# Supplementary material for: The effect of maternal age and planned place of birth on intrapartum outcomes in healthy women with straightforward pregnancies: secondary analysis of the Birthplace national prospective cohort study
Source: PubMed Central journal article supplement — BMJ Open. 2014 Jan 17;4(1):e004026. doi: 10.1136/bmjopen-2013-004026 (PMC3902355; doi:10.1136/bmjopen-2013-004026), 2014-01-17
Supplement: bmjopen-2013-004026.draft_revisions.pdf [file bmjopen-2013-004026.draft_revisions.pdf]

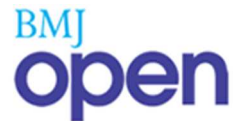

**The effect of maternal age and planned place of birth on intrapartum outcomes in healthy women with straightforward pregnancies: secondary analysis of the Birthplace national prospective cohort study**

|                                 |                                                                                                                                                                                                                                                                                                                                                                                                                                                                                                                                                                                                                                                                                                     |
|---------------------------------|-----------------------------------------------------------------------------------------------------------------------------------------------------------------------------------------------------------------------------------------------------------------------------------------------------------------------------------------------------------------------------------------------------------------------------------------------------------------------------------------------------------------------------------------------------------------------------------------------------------------------------------------------------------------------------------------------------|
| Journal:                        | <i>BMJ Open</i>                                                                                                                                                                                                                                                                                                                                                                                                                                                                                                                                                                                                                                                                                     |
| Manuscript ID:                  | bmjopen-2013-004026                                                                                                                                                                                                                                                                                                                                                                                                                                                                                                                                                                                                                                                                                 |
| Article Type:                   | Research                                                                                                                                                                                                                                                                                                                                                                                                                                                                                                                                                                                                                                                                                            |
| Date Submitted by the Author:   | 13-Sep-2013                                                                                                                                                                                                                                                                                                                                                                                                                                                                                                                                                                                                                                                                                         |
| Complete List of Authors:       | Li, Yangmei; University of Oxford, National Perinatal Epidemiology Unit, Nuffield Department of Population Health<br>Townend, John; University of Oxford, National Perinatal Epidemiology Unit, Nuffield Department of Population Health<br>Rowe, Rachel; University of Oxford, National Perinatal Epidemiology Unit, Nuffield Department of Population Health<br>Knight, Marian; University of Oxford, National Perinatal Epidemiology Unit, Nuffield Department of Population Health<br>Brocklehurst, Peter; University College London, Institute for Women's Health<br>Hollowell, Jennifer; University of Oxford, National Perinatal Epidemiology Unit, Nuffield Department of Population Health |
| <b>Primary Subject Heading</b>: | Obstetrics and gynaecology                                                                                                                                                                                                                                                                                                                                                                                                                                                                                                                                                                                                                                                                          |
| Secondary Subject Heading:      | Epidemiology, Medical management, Evidence based practice, Health services research                                                                                                                                                                                                                                                                                                                                                                                                                                                                                                                                                                                                                 |
| Keywords:                       | OBSTETRICS, Midwifery led care, Maternal medicine < OBSTETRICS, Intrapartum care                                                                                                                                                                                                                                                                                                                                                                                                                                                                                                                                                                                                                    |
|                                 |                                                                                                                                                                                                                                                                                                                                                                                                                                                                                                                                                                                                                                                                                                     |

SCHOLARONE™  
Manuscripts

1  
2  
3 **The effect of maternal age and planned place of birth on intrapartum**  
4 **outcomes in healthy women with straightforward pregnancies:**  
5 **secondary analysis of the Birthplace national prospective cohort**  
6 **study**  
7  
8  
9

10  
11  
12  
13  
14 **Authors**

15  
16  
17 Yangmei Li,<sup>1</sup> John Townend,<sup>1</sup> Rachel Rowe,<sup>1</sup> Marian Knight,<sup>1</sup> Peter Brocklehurst,<sup>2</sup> Jennifer Hollowell<sup>1</sup>

18  
19  
20 <sup>1</sup> National Perinatal Epidemiology Unit, University of Oxford, Oxford, UK

21  
22 <sup>2</sup> Institute for Women's Health, University College London, London, UK  
23  
24  
25  
26  
27

28 **Corresponding author**

29  
30 Jennifer Hollowell PhD, Policy Research Unit in Maternal Health and Care, National Perinatal  
31 Epidemiology Unit, University of Oxford, Old Road Campus, Headington, Oxford, OX3 7LF, United  
32 Kingdom  
33  
34

35  
36 Tel: +44 (0)1865 289452 (direct)/289700 (messages)

37  
38 Fax: +44 (0)1865 289701

39  
40 Email: [jennifer.hollowell@npeu.ox.ac.uk](mailto:jennifer.hollowell@npeu.ox.ac.uk)  
41  
42  
43

44 **Keywords**

45  
46 Maternal age, parity, birthing centre, home birth, augmentation, instrumental delivery, caesarean  
47 section, adverse maternal outcomes, adverse perinatal outcomes  
48  
49

50  
51 **Word count**

52  
53 Main text 4,277 words  
54  
55  
56  
57  
58  
59  
60

## Abstract

### Objectives

To describe the relationship between maternal age and intrapartum outcomes in 'low risk' women; and to evaluate whether the relationship between maternal age and intrapartum interventions and adverse outcomes differs by planned place of birth

### Design

Prospective cohort study

### Setting

Obstetric units, midwifery units and planned home births in England

### Participants

63,371 women aged over 16 without any known medical or obstetric risk factors, with singleton pregnancies, planning a vaginal birth

### Methods

Log Poisson regression was used to evaluate the association between maternal age, modelled as a continuous and categorical variable, and risk of intrapartum interventions and adverse maternal and perinatal outcomes.

### Main Outcome Measures

Intrapartum caesarean section, instrumental delivery, syntocinon augmentation and a composite measure of maternal interventions/adverse outcomes requiring obstetric care encompassing augmentation, instrumental delivery, intrapartum caesarean section, general anaesthesia, maternal blood transfusion, 3<sup>rd</sup>/4<sup>th</sup> degree perineal tear, maternal admission for higher level care; adverse perinatal outcome (composite of neonatal unit admission or perinatal death).

### Results

Interventions and adverse maternal outcomes requiring obstetric care generally increased with age, particularly in nulliparous women. For nulliparous women aged 16-40, the risk of experiencing an intervention or adverse outcome requiring obstetric care increased more steeply with age in planned non-obstetric unit births than in planned obstetric unit births (adjusted RR 1.21 per 5-year

1 increase in age, 95% CI 1.18-1.25 vs. adjusted RR 1.12, 95% CI 1.10-1.15) but absolute risks were  
2 lower in planned non-OU births at all ages. The risk of neonatal unit admission or perinatal death  
3 was significantly raised in nulliparous women aged 40+ relative to women aged 25-29 (adjusted RR  
4 2.29, 95% CI 1.28-4.09).  
5  
6  
7

## 8 **Conclusions**

9  
10 Younger nulliparous women appear to benefit more than older nulliparous women from planned  
11 birth in a non-obstetric unit setting. Age 40 is an appropriate threshold for recommending individual  
12 assessment when planning place of birth.  
13  
14  
15  
16  
17  
18  
19  
20  
21  
22  
23  
24  
25  
26  
27  
28  
29  
30  
31  
32  
33  
34  
35  
36  
37  
38  
39  
40  
41  
42  
43  
44  
45  
46  
47  
48  
49  
50  
51  
52  
53  
54  
55  
56  
57  
58  
59  
60

## Article summary

### Article focus

- Does increasing age in women without known medical or obstetric risk factors increase the risk of intrapartum interventions and adverse outcomes that might affect their choice of planned place of birth?

### Key messages

- Older women having a first baby appear to benefit less than younger women from planned birth in a non-obstetric unit setting.
- The chances of experiencing an intervention or outcome that requires obstetric care increase with age, even in women who do not have known risk factors.
- Increased intervention rates at older ages may partly reflect women's expectations and preferences and possibly 'higher risk' labelling by clinicians.

### Strengths and weaknesses

#### Strengths

- The study was based on a large, nationally representative cohort of 'low risk' women, with high quality data collected prospectively.

#### Weaknesses

- The number of women over 40 was relatively small so the study had limited power to explore effects in women over 40, particularly in non-obstetric unit settings.
- Planned births in non-obstetric unit settings were combined; graphical plots indicated that this was reasonable but important differences between settings cannot be ruled out.

## Background

The proportion of births in women aged 35 and over has been steadily rising in recent years in the UK and elsewhere.[1, 2] Currently approximately 16% of births in England and Wales are to women aged 35-39 and 4% of births are to women aged 40 and over.[1]

Advanced maternal age is associated with an increased risk of pregnancy complications including gestational diabetes,[3] pregnancy induced hypertension and preeclampsia,[4, 5] twin or higher order pregnancies,[3] breech presentation,[6] placenta praevia,[3, 7-9] preterm birth,[5, 10] post-term birth,[11], severe maternal morbidity,[12] and adverse perinatal outcomes including antepartum stillbirth,[13] intrapartum-related perinatal death,[14] early neonatal death[15] and neonatal unit admission.[5] Older women also have an increased risk of interventions such as induction and caesarean section.[16-20] However, many age-related pregnancy complications are known risk factors for intrapartum complications or adverse perinatal outcomes and women with these risk factors would normally be advised to give birth in an obstetric unit (OU). Relatively little is known about the incidence of intrapartum interventions and adverse maternal and perinatal outcomes in older women who do not have known risk factors.[21]

Current clinical guidelines[22] recommend that healthy women with straightforward pregnancies should be offered a choice of planned birth at home, in a midwife-led unit or in an obstetric unit, but also suggest individual assessment when planning place of birth for women over 40 at booking.[22] The evidence for 'low risk' women in general shows that planned birth in a non-OU setting is associated with a lower incidence of intrapartum interventions[22-28] and research has demonstrated that in 'low risk' women, after adjustment for maternal characteristics, planned birth in a midwifery unit and planned birth at home (multiparous women only) is not associated with an increased risk to the baby compared with planned birth in an OU.[25] However, the risks that might affect the choice of planned place of birth by healthy older women (and in particular nulliparous older women) are not well documented.

The aim of this study was to evaluate the association between maternal age and intrapartum interventions and adverse maternal and perinatal outcomes that may influence the choice of planned place of birth, in 'low risk' women with singleton, term pregnancies planning a vaginal birth.

The main objectives were to describe the relationship between maternal age and intrapartum interventions and adverse outcomes that indicate a need for obstetric or neonatal care in 'low risk' women; and to evaluate whether the relationship between maternal age and intrapartum interventions and adverse outcomes differs by planned place of birth.

1  
2  
3  
4  
5  
6  
7  
8  
9  
10  
11  
12  
13  
14  
15  
16  
17  
18  
19  
20  
21  
22  
23  
24  
25  
26  
27  
28  
29  
30  
31  
32  
33  
34  
35  
36  
37  
38  
39  
40  
41  
42  
43  
44  
45  
46  
47  
48  
49  
50  
51  
52  
53  
54  
55  
56  
57  
58  
59  
60

For peer review only

## Methods

### Settings and participants

The study used data from the Birthplace in England national prospective cohort study which was designed to compare perinatal and maternal outcomes and interventions by planned place of birth at the start of care in labour.

The cohort study methods are described in full elsewhere.[25, 26] Briefly, the Birthplace cohort included a total of 79,774 births between April 2008 and April 2010, including 32,257 planned OU births from a stratified random sample of 36 OUs, 11,666 planned births in 53 freestanding midwifery units (FMUs), 17,582 planned births in 43 alongside midwifery units (AMUs) and 18,269 planned home births from 142 NHS trusts across England. Births were eligible for inclusion if the woman was planning a vaginal birth and received some labour care from an NHS midwife in her planned birth setting. Women who had an elective caesarean section or caesarean section before the onset of labour, presented in preterm labour (<37 weeks' gestation), had a multiple pregnancy, an unplanned home birth, or who were "unbooked" (received no antenatal care) were excluded. Stillbirths occurring before the start of care in labour were excluded. Women in the cohort were classified as 'low risk' if before the start of labour they were not known to have any of the medical or obstetric risk factors listed in national guidelines on intrapartum care[22] as "indicating increased risk suggesting planned birth in an obstetric unit". The study had a high response rate and low levels of missing data.[25, 26]

The study population for the analyses reported here was 'low risk' women in the Birthplace cohort aged 16 years or over at the time of birth, with a term (gestational age 37<sup>+0</sup> weeks to 42<sup>+0</sup> weeks inclusive) pregnancy and parity less than 6. In the NICE intrapartum care guideline individual assessment is recommended when planning place of birth for women with parity of 6 or more and many midwifery units restrict admission to women of parity 5 or less.[29]

Research ethics committee approval for the Birthplace study was obtained from the Berkshire Research Ethics Committee and did not require consent to be sought from participants as no personally identifiable data were collected.

### Data

As described elsewhere,[25] maternal characteristics, and medical or obstetric risk factors known prior to the onset of labour were extracted from the woman's medical records by the midwife attending the birth. Complicating conditions identified by the midwife at the start of care in labour



1 (for example prolonged rupture of membranes), intrapartum interventions and adverse maternal  
2 and perinatal outcomes were recorded by the attending midwife using a data collection form started  
3 during labour and completed on or after the fifth postnatal day.  
4

5  
6 Planned place of birth (OU, AMU, FMU or home) was based on the intended place of birth at the  
7 start of care in labour. Women were included in the group in which they planned to give birth at the  
8 start of care in labour regardless of whether they were transferred during labour care or  
9 immediately after the birth.  
10  
11

## 12 **Outcomes**

13  
14 We focused on outcome measures that reflected interventions and adverse outcomes that indicated  
15 a need for obstetric and/or neonatal care, that is, outcomes that would require the woman and/or  
16 baby to be transferred to an obstetric or neonatal unit if labour care or birth took place elsewhere.  
17 For women, we considered the following outcomes both separately and as a combined maternal  
18 composite outcome ('interventions/adverse outcomes requiring obstetric care'): augmentation with  
19 syntocinon, instrumental delivery (ventouse or forceps), intrapartum caesarean section, general  
20 anaesthesia, maternal blood transfusion, 3<sup>rd</sup>/4<sup>th</sup> degree perineal tear, maternal admission for higher  
21 level care. The use of epidural/spinal analgesia was also considered as a secondary outcome. The  
22 main outcomes considered for women were the maternal composite outcome, augmentation,  
23 instrumental delivery, and intrapartum caesarean section.  
24  
25  
26  
27  
28  
29  
30  
31  
32

33 For babies, we considered a single composite outcome measure largely reflecting admission to a  
34 neonatal unit. This 'perinatal composite outcome' encompassed one or more of the following  
35 events: admission to a neonatal unit within 48 hours of birth, stillbirth after the onset of labour or  
36 early neonatal death.  
37  
38  
39  
40

## 41 **Statistical analysis**

42 Analyses were conducted separately by parity. We modelled age at the time of delivery both as a  
43 categorical and continuous variable, using log Poisson regression to estimate relative risks adjusted  
44 for the following potential confounders: ethnic group, understanding of English, marital or partner  
45 status, body mass index (BMI), index of multiple deprivation (IMD) score, gestational age at birth  
46 and, where appropriate, planned place of birth (see supplementary Table S1 for categorisation). We  
47 also carried out sensitivity analyses in which we additionally adjusted for the presence of  
48 complicating conditions identified at the start of care in labour (none, one or more) and for the use  
49 of epidural/spinal analgesia.  
50  
51  
52  
53  
54  
55  
56  
57  
58  
59  
60

1 We fitted a series of models following a pre-specified, iterative strategy. In order to test our  
2 modelling assumptions regarding age and to determine whether it was appropriate to combine data  
3 for planned births in non-OU settings, we plotted outcomes by age and planned place of birth using  
4 polynomial smoothing.[30] Visual inspection of these plots (see Figure 1 for the main outcomes)  
5 indicated that it was reasonable to model age as a continuous variable within the age range 16-40  
6 (inclusive) and further indicated that event rates were generally similar in the three non-OU settings,  
7 suggesting that it was reasonable to combine the non-OU settings for the purposes of exploring  
8 interactions between maternal age and planned place of birth. We did not model age as a  
9 continuous variable above the age of 40 because data were sparse, particularly for planned non-OU  
10 births to nulliparous women, and we could not be confident that the broadly linear trends seen at  
11 younger ages could be extrapolated above this age.  
12

13 We initially modelled the effect of age on study outcomes separately by parity and for all planned  
14 places of birth combined. Models in which age was modelled as a continuous variable were  
15 restricted to the age range 16-40 inclusive. For each of the study outcomes, we tested for an  
16 interaction between age (as a continuous variable) and planned place of birth (OU vs. non-OU) using  
17 a Wald test, and where the interaction was significant at the 5% level, we modelled the effect of age  
18 on the outcome separately by planned place of birth.  
19

20 In order to test whether the presence of complicating conditions at the start of care in labour (for  
21 example prolonged rupture of membranes) had an effect on the observed relationships, we fitted a  
22 further set of models in which we adjusted for both maternal characteristics and the presence of  
23 complicating conditions. Because previous analyses have shown that women planning birth in an OU  
24 have a higher prevalence of complicating conditions than in other settings[25] and this affects the  
25 magnitude of the difference in event rates between settings, we carried out further analyses of the  
26 main outcomes restricted to 'low risk' women without complicating conditions at the start of care in  
27 labour.  
28

29 Robust variance estimation was used to allow for the clustered nature of the data and, as described  
30 elsewhere,[25, 26] probability weights were incorporated to account for differences in the  
31 probability of a woman being selected for inclusion in the study arising from differences in each  
32 unit/trust's period of participation and the stratum specific probabilities of selection of OUs. The  
33 weighting is such that, when applied to the pooled data for all four settings, the weighted event  
34 rates represent the estimated average event rates for England as a whole.  
35  
36  
37  
38  
39  
40  
41  
42  
43  
44  
45  
46  
47  
48  
49  
50  
51  
52  
53  
54  
55  
56  
57  
58  
59  
60

1 For each outcome, we calculated the number of events, the number of births, the weighted  
2 incidence and the unadjusted and adjusted relative risks. We assessed statistical significance at the  
3  
4 5% level.  
5  
6  
7  
8  
9  
10  
11  
12  
13  
14  
15  
16  
17  
18  
19  
20  
21  
22  
23  
24  
25  
26  
27  
28  
29  
30  
31  
32  
33  
34  
35  
36  
37  
38  
39  
40  
41  
42  
43  
44  
45  
46  
47  
48  
49  
50  
51  
52  
53  
54  
55  
56  
57  
58  
59  
60

For peer review only

## Results

### Description of the study sample

From the 79,774 women in the Birthplace cohort we excluded 15,553 women who had pre-existing medical and obstetric risk factors, 62 women who were aged <16, 682 women who had missing data on risk factors, parity or gestational age, and 106 whose age was missing. The study population consisted of 63,371 eligible 'low risk' women. The proportion (weighted) of women who were ineligible because of pre-existing medical or obstetric risk factors, increased from 31.9% in women aged 16-19 to 46.7% in women aged 40 and over.

Table 1 describes the characteristics of the sample by age. The percentages shown in the table are weighted so that they provide an estimate of the distribution of maternal characteristics that would apply to eligible 'low risk' births in England. Older women tended to be white, have a fluent understanding of English, and were more likely than younger women to live in a socioeconomically advantaged area. They were less likely than younger women to be nulliparous and more likely to have had multiple previous pregnancies. Planned home births were more common at older ages (Table 1 and supplementary Tables S2 and S3), particularly in multiparous women (supplementary Table S3). Older women were more likely to have complicating conditions, such as prolonged rupture of membranes, noted by the midwife at the start of care in labour (Table 1). Complicating conditions at start of care in labour were more common in nulliparous women (supplementary Tables S2 and S3).

[TABLE 1 HERE]

### Maternal interventions and adverse outcomes

Descriptive plots of outcomes by age indicated that the incidence of most outcomes tended to increase steadily with age in the age range 16 to 40, and that incidence rates were generally lower in planned non-OU births (Figure 1 and supplementary Figure S1). Rates for planned OU and non-OU births tended to diverge above this age range, but rates were based on small numbers of older women (supplementary Table S4) particularly for planned AMU and FMU births and therefore these rates have wide confidence intervals.

For nulliparous women in the age range 16-40 (all PPOBs combined), the adjusted risk of having an intervention/ adverse outcome requiring obstetric care (maternal composite) increased significantly with age, as did the risk of augmentation with syntocinon, instrumental delivery, intrapartum caesarean section, 3<sup>rd</sup>/4<sup>th</sup> degree perineal tear, or maternal admission for higher level care (Table 2).

1 For augmentation with syntocinon and the maternal composite outcome, the effect of age differed  
2 by PPOB (Table 2). The risk of augmentation increased more steeply with age in non-OU settings (RR  
3 1.23, 95% CI 1.18-1.28 for every 5-year increase in age in planned non-OU births vs. 1.12, 95% CI  
4 1.07-1.17 for planned OU births). Nevertheless, the proportion of women receiving augmentation  
5 was lower in planned non-OU births at all ages (Table 3). For example, 42.2% (95% CI 36.4%-48.1%)  
6 of nulliparous women aged 35-39 who planned birth in an OU received augmentation with  
7 syntocinon compared with 22.6% (95% CI 19.8%-25.7%) of nulliparous women of the same age who  
8 planned birth in a non-OU setting. A similar pattern was observed for the maternal composite  
9 outcome: the risk of an intervention/adverse outcome requiring obstetric care (maternal composite)  
10 increased slightly more steeply with age in the non-OU settings (RR 1.21, 95% CI 1.18-1.25 for every  
11 5-year increase in age in planned non-OU births vs. 1.12, 95% CI 1.10-1.15 for planned OU births) but  
12 the absolute risk was lower in the planned non-OU birth (Table 3). For example, 65.5% (95% CI  
13 61.8%-69.1%) of nulliparous women aged 35-39 who planned birth in an OU experienced an  
14 intervention/adverse outcome requiring obstetric care compared with 39.9% (95% CI 36.0%-43.9%)  
15 of nulliparous women of the same age who planned birth in a non-OU setting.  
16  
17  
18  
19  
20  
21  
22  
23  
24

25 [TABLE 2 AND TABLE 3 HERE]  
26  
27

28 In nulliparous women, the risk of instrumental delivery and intrapartum caesarean section increased  
29 significantly with age (RR 1.18, 95% CI 1.12-1.25 and RR 1.27, 95% CI 1.23-1.32) across all settings.  
30 Again, absolute risks were substantially lower in planned non-OU births (Table 3).  
31  
32  
33

34 For multiparous women aged 16-40 (all PPOBs combined), the combined risk of having an  
35 intervention or adverse outcome requiring obstetric care (maternal composite) or of instrumental  
36 delivery, intrapartum caesarean section, and maternal admission for higher level care increased with  
37 age (Table 2). Augmentation with syntocinon, general anaesthesia, blood transfusion, and 3<sup>rd</sup>/4<sup>th</sup>  
38 degree perineal tear were not associated with maternal age in multiparous women (Table 2). For all  
39 of the outcomes considered, the effect of age did not differ by PPOB in multiparous women (Table  
40 2). Again, for the maternal composite outcome, augmentation with syntocinon, instrumental  
41 delivery, intrapartum caesarean section, the absolute event rates were lower in planned non-OU  
42 births in most age categories (Table 4). For example, 9.8% (95% CI 8.2%-11.6%) of multiparous  
43 women aged 35-39 who planned birth in an OU received augmentation with syntocinon compared  
44 with 1.8% (95% CI 1.3%-2.5%) of women of the same age who planned birth in a non-OU setting.  
45  
46  
47  
48  
49  
50  
51  
52

53 Up to age 40, other less common outcomes did not increase significantly with maternal age in  
54 nulliparous or multiparous women with the exception of maternal admission to higher level care  
55 (Table 2 and supplementary Tables S5 and S6).  
56  
57  
58  
59  
60

1 [TABLE 4 HERE]

2  
3 Adjustment for complicating conditions at the start of care in labour had a negligible effect on the  
4 relationship between age and the study outcomes (supplementary Table S7). Absolute event rates  
5 for the main outcomes (maternal composite, augmentation with syntocinon, instrumental delivery,  
6 intrapartum caesarean section and perinatal composite) were reduced when the analysis was  
7 restricted to women without complicating conditions identified at start of labour care but absolute  
8 intervention rates remained substantially higher at all ages in planned OU births vs. planned births in  
9 other settings (supplementary Tables S8 and S9).

10  
11 The use of epidural/spinal analgesia increased significantly with maternal age and lower rates of use  
12 were observed in planned non-OU births (supplementary Figure S2). Adjustment for use of epidural  
13 in the multivariable models attenuated but did not change the results materially (data not shown).

### 20 21 **Perinatal outcome**

22  
23 The perinatal composite outcome (admission to a neonatal unit within 48 hours of birth, stillbirth  
24 after the onset of labour or early neonatal death) showed a modest but not statistically significant  
25 increase with age in nulliparous women in the age range 16-40 (Table 2). The risk increased  
26 significantly in nulliparous women aged 40+ compared with women aged 25-29 (RR 2.29, 95%CI  
27 1.28-4.09, adjusted for maternal characteristics and planned place of birth, all settings combined).  
28 Maternal age was not significantly associated with the risk of the perinatal composite outcome in  
29 multiparous women in the age range 16-40 (Table 2) and the risk was not significantly increased in  
30 births to multiparous women aged 40+ compared with women aged 25-29 (RR 1.21, 95% CI 0.60-  
31 2.43, adjustment as before). Absolute event rates are shown in Table 5.

32  
33 [TABLE 5 HERE]

## Discussion

### Principal findings

In women without known medical or obstetric risk factors prior to the onset of labour, interventions and adverse maternal outcomes requiring obstetric care generally increased with age, but there was no age at which there was a step-change in risk. For both nulliparous and multiparous women, maternal intervention rates were lower in births planned in non-OU settings compared with planned OU births, but for nulliparous women the overall risk of experiencing an intervention or adverse outcome requiring obstetric care, and in particular of augmentation with syntocinon, increased more steeply with age in planned non-OU births than in planned OU births. As a consequence, the benefit of planned non-OU birth was greatest at younger ages and reduced with increasing age.

In low risk women up to the age of 40, the risk of neonatal unit admission or intrapartum stillbirth/early neonatal death did not show a statistically significant upward trend with age in either nulliparous or multiparous women. In planned OU births, the risk of neonatal unit admission or perinatal death was significantly higher in nulliparous women aged 40+ relative to women aged 25-29.

### Strengths and limitations

A strength of the study is that we were able to evaluate the effect of age on intrapartum outcomes by planned birth setting in a nationally representative sample of 'low risk' women. In order to strengthen the evidence supporting clinical guidelines on planned place of birth, the study specifically focused on outcomes that reflect need for obstetric or neonatal care in a sample of women who meet the current criteria for planned birth in a non-OU setting.[22] To our knowledge, this is the first study to investigate the effect of increasing maternal age in different birth settings with a focus on outcomes that would require transfer to an OU and hence may affect the choice of planned place of birth.

Despite the large overall sample size, the number of older women was relatively small, so we had limited ability to explore effects above age 40 or to separate results of individual non-OU birth settings. We combined data for the non-OU settings, having first explored the data to check that this was reasonable. This increased our statistical power to evaluate the association between maternal age and the study outcomes (maternal and perinatal), but we still lacked the statistical power to evaluate uncommon outcomes. It is important to note that previous analyses[25] have shown that planned home births are associated with a significantly increased risk of adverse perinatal outcomes in nulliparous women.

1 The risk of bias due to missing data and non-response was low: the study had a low level of missing  
2 data, a high response rate[25, 26] and, because consent was not required, there was no self-  
3 selection bias due to non-consent. We controlled for important potential confounders such as body  
4 mass index and, because the study focused on a relatively homogeneous population of women  
5 without known medical or obstetric risk factors, uncontrolled differences in clinical risks between  
6 groups seem unlikely to explain our findings. Nevertheless, women self-select their birth setting and  
7 it may be that some of the differences in outcomes that we observed between settings may have  
8 been due to unmeasured differences in the characteristics of women opting for OU and non-OU  
9 births, rather than to differences attributable to the birth setting.  
10  
11  
12  
13  
14  
15

### 16 **Comparison with the existing literature**

17  
18  
19 Older women have been shown to have an increased risk of intrapartum intervention,[6, 31] but  
20 many studies include women known to be at higher risk who would normally be advised to give birth  
21 in an obstetric unit. Evidence relating to 'low risk' women[17] or from studies that have controlled  
22 for pre-existing risk factors or complications[32] is more limited but is generally consistent with our  
23 finding that intervention rates increase with age in 'low risk' women.  
24  
25  
26  
27

28 There is extensive evidence that 'low risk' women who plan birth in a non-OU setting have a reduced  
29 risk of a range of intrapartum interventions, including augmentation, instrumental delivery and  
30 intrapartum caesarean section, and are more likely to have a spontaneous vaginal birth.[22-24, 27,  
31 28] Our study found that, across the age range 16-40, women who plan birth in a non-OU setting  
32 experience substantially lower intervention rates and are less likely to experience an outcome  
33 requiring obstetric care than women of the same age who plan birth in an obstetric unit.  
34  
35  
36  
37

38 In nulliparous women we found that rates of augmentation of labour with syntocinon increased  
39 more steeply with maternal age in planned non-OU births compared with planned OU births. An  
40 age-related increase in augmentation is consistent with evidence of poorer uterine function at older  
41 ages,[33] longer labours[33] and an increased incidence of prolonged labour,[34, 35] but the reasons  
42 for a steeper increase in augmentation with age in non-OU settings is unclear. It has been suggested  
43 that labelling of older women as 'higher risk' and/or heightened concern about the safety of older  
44 nulliparous women, particularly those who have required fertility treatment, may result in increased  
45 rates of caesarean section for non-medical reasons,[20, 31, 32, 36] and it is possible that similar  
46 factors affect midwives' decision making regarding transfer for failure to progress, or for other  
47 reasons. Intrapartum transfers from midwifery units in the Birthplace study have been shown to  
48 increase significantly with age in nulliparous women[37] and, once transferred, women are  
49 'exposed' to the higher intervention rates found in obstetric units.  
50  
51  
52  
53  
54  
55  
56  
57  
58  
59  
60



1 It is also possible that age-related differences in women's expectations and expressed preferences  
2 may contribute to the pattern of intervention observed in our study. Older nulliparous women have  
3 been found to have a more positive attitude towards caesarean section,[38] for example, and also to  
4 have a higher perception of pregnancy risk, even in older women without known risk factors.[39]  
5 The significant positive association between maternal age and epidural use observed in our study  
6 (seen most strongly in nulliparous women planning a non-OU birth), would be consistent with a  
7 greater willingness of older women to consider interventions.  
8  
9

10  
11  
12  
13 We found a significantly increased risk of maternal admission to higher level care at older ages in  
14 both nulliparous and multiparous women. The number of events was small and this could be a  
15 chance finding but an increase in serious obstetric complications at older ages observed in some  
16 studies[3, 6, 12] cannot be ruled out.  
17  
18

19  
20 Although studies including women with known risk factors have reported increased risks in women  
21 aged over 35,[3, 6, 34] our analysis shows that up to the age of 40, risks tend to increase in a broadly  
22 linear manner in healthy women with straightforward pregnancies, with no evidence of a step-  
23 change in risk below the age of 40. Other studies have similarly concluded that the association of  
24 adverse outcomes with maternal age is a continuum,[3] with the increase in adverse perinatal  
25 outcomes possibly gaining momentum above the age of 40.[40] Because of the small number of  
26 births to mothers aged over 40 in our sample we had limited power to evaluate risks at older ages  
27 and other evidence relating to older 'low risk' women is sparse.[21]  
28  
29

30  
31  
32  
33  
34 There is some evidence that the babies of older women are at increased risk of serious adverse  
35 outcomes, including intrapartum-related perinatal death,[14] early neonatal death[15] and neonatal  
36 unit admission,[5, 32] but these outcomes would be expected to be substantially reduced in 'low  
37 risk' women who, by definition, do not have medical or obstetric risk factors such as severe obesity,  
38 diabetes or previous caesarean section. Furthermore, the poorer outcomes associated with the  
39 increased risk of pre-term birth at older ages do not apply to women giving birth at term. In our 'low  
40 risk' cohort, we did not observe a significant increase with age in our composite measure of neonatal  
41 unit admission/perinatal death within the age range 16-40, but graphical plots for nulliparous  
42 women suggested a possible upturn in neonatal unit admission/perinatal death around the age of 40  
43 in nulliparous women. Further research evaluating perinatal outcomes in 'low risk' women aged over  
44 40 is needed.  
45  
46  
47  
48  
49  
50  
51

## 52 53 **Conclusions and policy implications**

54  
55  
56 The incidence of intrapartum interventions and adverse outcomes requiring obstetric care increases  
57 with maternal age, but at all ages 'low risk' women who plan birth in a non-obstetric unit setting  
58  
59  
60

1 tend to experience lower intervention rates than comparable women who plan birth in an OU.  
2 Younger nulliparous women appear to benefit more than older nulliparous women from planned  
3 birth in a non-OU setting. Increased intervention rates at older ages may partly reflect women's  
4 expectations and preferences and possibly 'higher risk' labelling by clinicians.  
5  
6

7  
8 The findings support the current threshold of age 40 for recommending individual assessment when  
9 planning place of birth. Healthy older nulliparous women with straightforward pregnancies planning  
10 birth in non-OU setting should be informed that they have an increased risk of interventions that  
11 require transfer to an OU. Further research is required to evaluate adverse perinatal outcomes in  
12 'low risk' women aged over 40.  
13  
14  
15  
16  
17  
18  
19  
20  
21  
22  
23  
24  
25  
26  
27  
28  
29  
30  
31  
32  
33  
34  
35  
36  
37  
38  
39  
40  
41  
42  
43  
44  
45  
46  
47  
48  
49  
50  
51  
52  
53  
54  
55  
56  
57  
58  
59  
60

## Acknowledgements

We thank Xiaosi Wang for conducting initial literature searches and statistical analysis.

## Competing interests

None.

## Contribution to authorship

JH conceived and developed the study outline with input from PB; YL developed the protocol and analysis plan with input from JH, JT and MK; YL conducted the analysis; JT provided statistical advice; YL and JH drafted the manuscript with input from RR, MK and PB. All authors were involved in interpretation of data, review and revision of the draft manuscript and approval of the final version.

## Ethics Approval

Research ethics committee approval for the Birthplace study was obtained from the Berkshire Research Ethics Committee (MREC ref 07/H0505/151).

## Funding

This paper reports on an independent study which is funded by the Policy Research Programme in the Department of Health. The views expressed are not necessarily those of the Department.

Birthplace combines the Evaluation of Maternity Units in England study funded in 2006 by the National Institute for Health Research Service Delivery and Organisation (NIHR SDO) programme, and the Birth at Home in England study funded in 2007 by the Department of Health Policy Research Programme (DH PRP). From January 2012, the NIHR SDO programme merged with the NIHR Health Services Research programme to establish the new NIHR health Services and Delivery Research (NIHR HS&DR) programme. The views and opinions expressed by the authors do not necessarily reflect those of the HS&DR Programme, NIHR, NHS, DH PRP or the Department of Health.

## References

1. Office for National Statistics. Live Births in England and Wales by Characteristics of Mother 1, 2011. 2013.
2. Martin JA, Hamilton BE, Ventura SJ, et al. Births: final data for 2009. *Natl Vital Stat Rep.* 2011;**60**(1):1-70. doi:
3. Biro MA, Davey M-A, Carolan M, et al. Advanced maternal age and obstetric morbidity for women giving birth in Victoria, Australia: A population-based study. *Aust N Z J Obstet Gynaecol.* 2012;**52**(3):229-34. doi: 10.1111/j.1479-828X.2012.01427.x
4. Carolan M. Maternal age  $\geq 45$  years and maternal and perinatal outcomes: A review of the evidence. *Midwifery.* 2013;**29**(5):479-89. doi: 10.1016/j.midw.2012.04.001
5. Delbaere I, Verstraelen H, Goetgeluk S, et al. Pregnancy outcome in primiparae of advanced maternal age. *European Journal of Obstetrics & Gynecology and Reproductive Biology.* 2007;**135**(1):41-6. doi: 10.1016/j.ejogrb.2006.10.030
6. Jolly M, Sebire N, Harris J, et al. The risks associated with pregnancy in women aged 35 years or older. *Hum Reprod.* 2000;**15**(11):2433-7. doi: 10.1093/humrep/15.11.2433
7. Ananth CV, Demissie K, Smulian JC, et al. Placenta previa in singleton and twin births in the United States, 1989 through 1998: A comparison of risk factor profiles and associated conditions. *Am J Obstet Gynecol.* 2003;**188**(1):275-81. doi: 10.1067/mob.2003.10
8. Ananth CV, Wilcox AJ, Savitz DA, et al. Effect of maternal age and parity on the risk of uteroplacental bleeding disorders in pregnancy. *Obstet Gynecol.* 1996;**88**(4, Part 1):511-6. doi: 10.1016/0029-7844(96)00236-0
9. Faiz AS, Ananth CV. Etiology and risk factors for placenta previa: an overview and meta-analysis of observational studies. *Journal of Maternal-Fetal and Neonatal Medicine.* 2003;**13**(3):175-90. doi: 10.1080/jmf.13.3.175.190
10. Jacobsson B, Ladfors L, Milsom I. Advanced Maternal Age and Adverse Perinatal Outcome. *Obstet Gynecol.* 2004;**104**(4):727-33 10.1097/01.AOG.0000140682.63746.be. doi: 10.1097/01.AOG.0000140682.63746.be

- 1 11. Roos N, Sahlin L, Ekman-Ordeberg G, et al. Maternal risk factors for postterm pregnancy and  
2 cesarean delivery following labor induction. *Acta Obstet Gynecol Scand*. 2010;**89**(8):1003-10. doi:  
3 10.3109/00016349.2010.500009
- 4  
5  
6 12. Knight M, Kurinczuk JJ, Spark P, et al. Inequalities in maternal health: national cohort study  
7 of ethnic variation in severe maternal morbidities. *BMJ*. 2009;**338**:b542. doi: 10.1136/bmj.b542
- 8  
9  
10 13. Huang L, Sauve R, Birkett N, et al. Maternal age and risk of stillbirth: a systematic review.  
11 *Can Med Assoc J*. 2008;**178**(2):165-72. doi: 10.1503/cmaj.070150
- 12  
13  
14 14. Pasupathy D, Wood AM, Pell JP, et al. Advanced maternal age and the risk of perinatal death  
15 due to intrapartum anoxia at term. *J Epidemiol Community Health*. 2011;**65**(3):241-5. doi:  
16 10.1136/jech.2009.097170
- 17  
18  
19 15. Gilbert WM, Nesbitt TS, Danielsen B. Childbearing Beyond Age 40: Pregnancy Outcome in  
20 24,032 Cases. *Obstet Gynecol*. 1999;**93**(1):9-14. doi:  
21  
22  
23 16. Ezra Y, McParland P, Farine D. High delivery intervention rates in nulliparous women over  
24 age 35. *European Journal of Obstetrics & Gynecology and Reproductive Biology*. 1995;**62**(2):203-7.  
25 doi: [http://dx.doi.org/10.1016/0301-2115\(95\)02201-H](http://dx.doi.org/10.1016/0301-2115(95)02201-H)
- 26  
27  
28 17. Gordon D, Milberg J, Daling J, et al. Advanced Maternal Age As a Risk Factor for Cesarean  
29 Delivery. *Obstet Gynecol*. 1991;**77**(4):493-7. doi:  
30  
31  
32 18. Heffner LJ, Elkin E, Fretts RC. Impact of labor induction, gestational age, and maternal age on  
33 cesarean delivery rates. *Obstet Gynecol*. 2003;**102**(2):287-93. doi: 10.1016/S0029-7844(03)00531-3
- 34  
35  
36 19. Patel RR, Peters TJ, Murphy DJ, et al. Prenatal risk factors for Caesarean section. Analyses of  
37 the ALSPAC cohort of 12 944 women in England. *Int J Epidemiol*. 2005;**34**(2):353-67. doi:  
38 10.1093/ije/dyh401
- 39  
40  
41 20. Peipert JF, Bracken MB. Maternal Age: An Independent Risk Factor for Cesarean Delivery.  
42 *Obstet Gynecol*. 1993;**81**(2):200-5. doi:  
43  
44  
45 21. Carolan M. The Graying of the Obstetric Population: Implications for the Older Mother. *J*  
46 *Obstet Gynecol Neonatal Nurs*. 2003;**32**(1):19-27. doi: 10.1177/0884217502239797
- 47  
48  
49 22. National Collaborating Centre for Women's and Children's Health. Intrapartum care of  
50 healthy women and their babies during childbirth. Commissioned by the National Institute for Health  
51 and Clinical Excellence (NICE). London: RCOG press; 2007.
- 52  
53  
54  
55  
56  
57  
58  
59  
60

- 1 23. Hodnett ED, Downe S, Walsh D. Alternative versus conventional institutional settings for  
2 birth. Cochrane Database of Systematic Reviews [Internet]. (8). Available from:  
3 <http://onlinelibrary.wiley.com/doi/10.1002/14651858.CD000012.pub4/abstract>.  
4  
5  
6 24. Walsh D, Downe SM. Outcomes of free-standing, midwife-led birth centers: a structured  
7 review. *Birth*. 2004;**31**(3):222-9. doi: 10.1111/j.0730-7659.2004.00309.x  
8  
9  
10 25. Birthplace in England Collaborative Group. Perinatal and maternal outcomes by planned  
11 place of birth for healthy women with low risk pregnancies: the Birthplace in England national  
12 prospective cohort study. *BMJ*. 2011;**343**:d7400. doi: 10.1136/bmj.d7400  
13  
14  
15 26. Hollowell J, Puddicombe D, Rowe R, et al. The Birthplace national prospective cohort study:  
16 perinatal and maternal outcomes by planned place of birth. Birthplace in England research  
17 programme. Final report part 4. NIHR Service Delivery and Organisation programme, 2011.  
18  
19  
20 27. Lindgren HE, Radestad IJ, Christensson K, et al. Outcome of planned home births compared  
21 to hospital births in Sweden between 1992 and 2004. A population-based register study. *Acta Obstet*  
22 *Gynecol Scand*. 2008;**87**(7):751-9. doi: 10.1080/00016340802199903  
23  
24  
25 28. Janssen PA, Saxell L, Page LA, et al. Outcomes of planned home birth with registered midwife  
26 versus planned hospital birth with midwife or physician. *CMAJ*. 2009;**181**(6-7):377-83. doi:  
27 10.1503/cmaj.081869  
28  
29  
30 29. Redshaw M, Rowe R, Schroeder L, et al. Mapping maternity care. The configuration of  
31 maternity care in England. Birthplace in England research programme. Final report part 3. NIHR  
32 Service Delivery and Organisation programme, 2011.  
33  
34  
35 30. Fan J, Gijbels I. Local Polynomial Modelling and Its Applications. London: Chapman & Hall;  
36 1996.  
37  
38  
39 31. Bayrampour H, Heaman M. Advanced Maternal Age and the Risk of Cesarean Birth: A  
40 Systematic Review. *Birth*. 2010;**37**(3):219-26. doi: 10.1111/j.1523-536X.2010.00409.x  
41  
42  
43 32. Bell JS, Campbell DM, Graham WJ, et al. Can obstetric complications explain the high levels  
44 of obstetric interventions and maternity service use among older women? A retrospective analysis  
45 of routinely collected data. *BJOG*. 2001;**108**(9):910-8. doi: 10.1111/j.1471-0528.2001.00214.x  
46  
47  
48 33. Main DM, Main EK, Moore li DH. The relationship between maternal age and uterine  
49 dysfunction: A continuous effect throughout reproductive life. *Am J Obstet Gynecol*.  
50 2000;**182**(6):1312-20. doi: 10.1067/mob.2000.106249  
51  
52  
53  
54  
55  
56  
57  
58  
59  
60

- 1  
2  
3  
4  
5  
6  
7  
8  
9  
10  
11  
12  
13  
14  
15  
16  
17  
18  
19  
20  
21  
22  
23  
24  
25  
26  
27  
28  
29  
30  
31  
32  
33  
34  
35  
36  
37  
38  
39  
40  
41  
42  
43  
44  
45  
46  
47  
48  
49  
50  
51  
52  
53  
54  
55  
56  
57  
58  
59  
60
34. Berkowitz GS, Skovron ML, Lapinski RH, et al. Delayed Childbearing and the Outcome of Pregnancy. *N Engl J Med*. 1990;**322**(10):659-64. doi: 10.1056/NEJM199003083221004
35. Greenberg MB, Cheng YW, Sullivan M, et al. Does length of labor vary by maternal age? *Am J Obstet Gynecol*. 2007;**197**(4):428.e1-.e7. doi: 10.1016/j.ajog.2007.06.058
36. Cnattingius R, Cnattingius S, Notzon FC. Obstacles to reducing cesarean rates in a low-cesarean setting: the effect of maternal age, height, and weight. *Obstet Gynecol*. 1998;**92**(4, Part 1):501-6. doi: 10.1016/s0029-7844(98)00244-0
37. Rowe RE, Fitzpatrick R, Hollowell J, et al. Transfers of women planning birth in midwifery units: data from the Birthplace prospective cohort study. *BJOG*. 2012;**119**(9):1081-90. doi: 10.1111/j.1471-0528.2012.03414.x
38. Aasheim V, Waldenstrom U, Rasmussen S, et al. Experience of childbirth in first-time mothers of advanced age - a Norwegian population-based study. *BMC Pregnancy Childbirth*. 2013;**13**:53. doi: 10.1186/1471-2393-13-53
39. Bayrampour H, Heaman M, Duncan KA, et al. Comparison of Perception of Pregnancy Risk of Nulliparous Women of Advanced Maternal Age and Younger Age. *Journal of Midwifery & Women's Health*. 2012;**57**(5):445-53. doi: 10.1111/j.1542-2011.2012.00188.x
40. Carolan M, Frankowska D. Advanced maternal age and adverse perinatal outcome: A review of the evidence. *Midwifery*. 2011;**27**(6):793-801. doi: 10.1016/j.midw.2010.07.006

1  
2  
3  
4  
5  
6  
7  
8  
9  
10  
11  
12  
13  
14  
15  
16  
17  
18  
19  
20  
21  
22  
23  
24  
25  
26  
27  
28  
29  
30  
31  
32  
33  
34  
35  
36  
37  
38  
39  
40  
41  
42  
43  
44  
45  
46  
47  
48  
49  
50  
51  
52  
53  
54  
55  
56  
57  
58  
59  
60

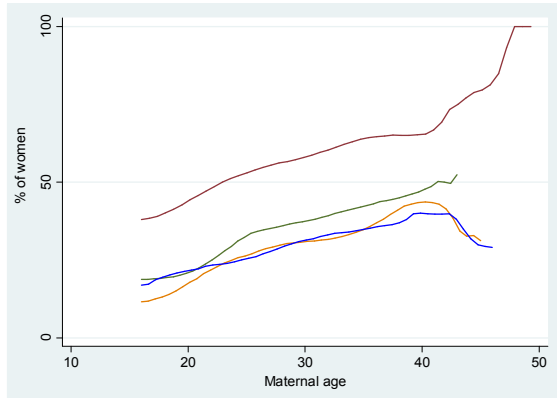

(a) Maternal composite, nulliparous women

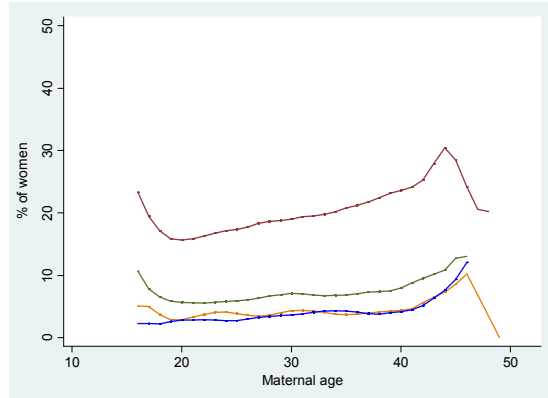

(e) Maternal composite, multiparous women

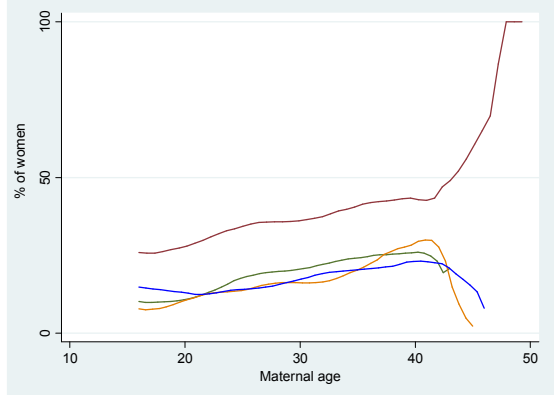

(b) Augmentation, nulliparous women

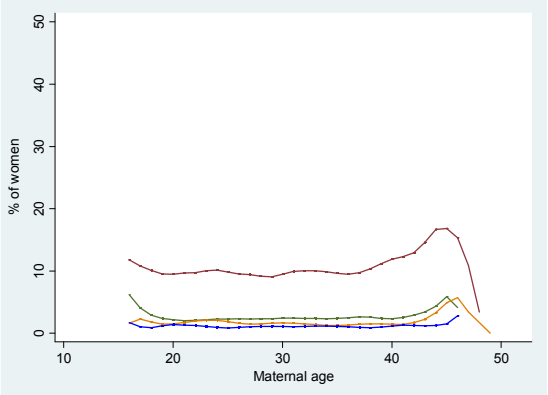

(f) Augmentation, multiparous women

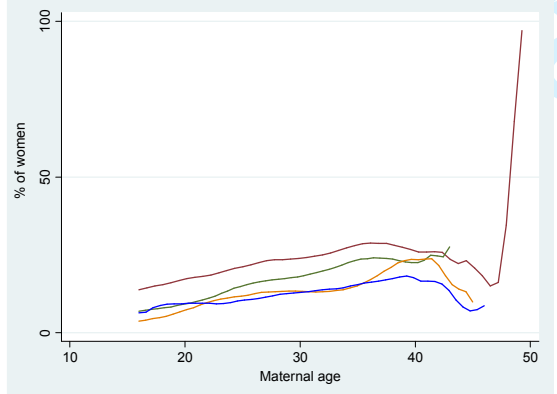

(c) Instrumental delivery, nulliparous women

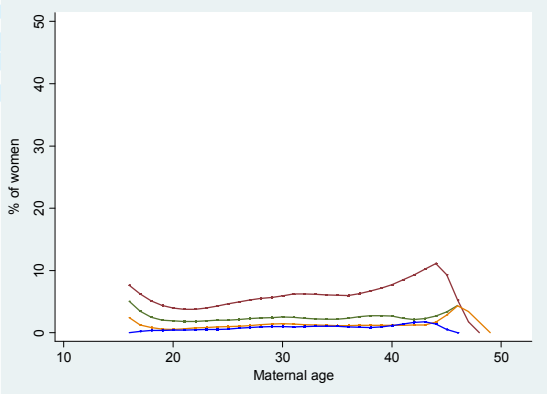

(g) Instrumental delivery, multiparous women

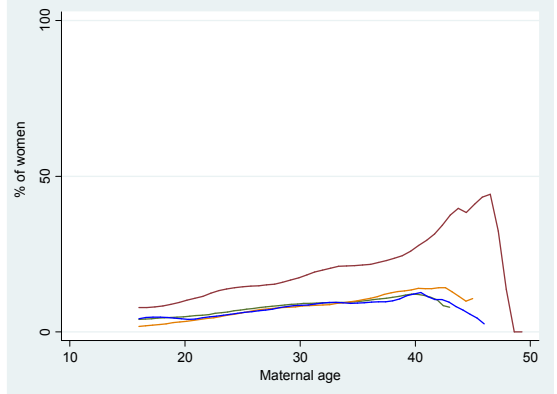

(d) Intrapartum caesarean section, nulliparous

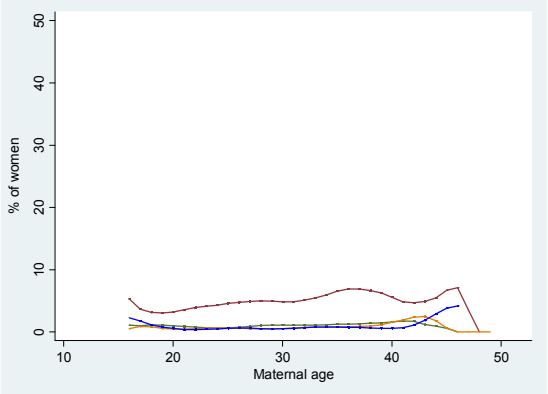

(h) Intrapartum caesarean section, multiparous

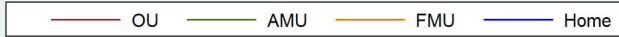



1 **Figure 1 Association between maternal age and intrapartum interventions and adverse maternal outcomes**  
2 **in low risk women aged 16 and over<sup>1</sup>**

3 <sup>1</sup> NOTE THAT scales for nulliparous women and multiparous women are different.  
4  
5  
6  
7  
8  
9  
10  
11  
12  
13  
14  
15  
16  
17  
18  
19  
20  
21  
22  
23  
24  
25  
26  
27  
28  
29  
30  
31  
32  
33  
34  
35  
36  
37  
38  
39  
40  
41  
42  
43  
44  
45  
46  
47  
48  
49  
50  
51  
52  
53  
54  
55  
56  
57  
58  
59  
60

For peer review only

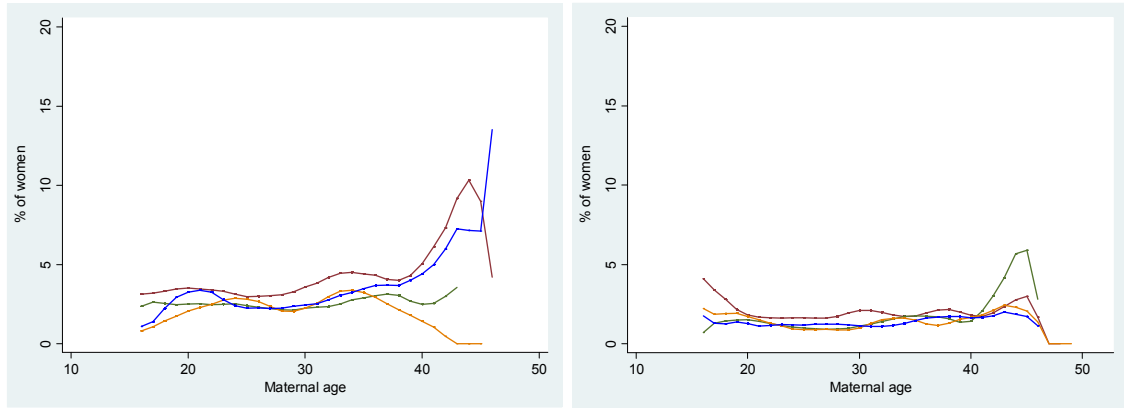

(a) Perinatal composite, nulliparous women

(b) Perinatal composite, multiparous women

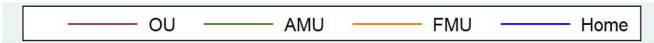

**Figure 2 Association between maternal age and perinatal composite outcome in low risk women aged 16 and over**

1  
2  
3  
4  
5  
6  
7  
8  
9  
10  
11  
12  
13  
14  
15  
16  
17  
18  
19  
20  
21  
22  
23  
24  
25  
26  
27  
28  
29  
30  
31  
32  
33  
34  
35  
36  
37  
38  
39  
40  
41  
42  
43  
44  
45  
46  
47  
48  
49  
50  
51  
52  
53  
54  
55  
56  
57  
58  
59  
60

**Table 1 Characteristics of low risk women aged 16 and over by maternal age category**

|                                            | 16 - 19 years |                | 20 - 24 years |                | 25 - 29 years |                | 30 - 34 years |                | 35 - 39 years |                | ≥ 40 years |                |
|--------------------------------------------|---------------|----------------|---------------|----------------|---------------|----------------|---------------|----------------|---------------|----------------|------------|----------------|
|                                            | n=3354        |                | n=11395       |                | n=18091       |                | n=18453       |                | n=10397       |                | n=1681     |                |
|                                            | n             | % <sup>1</sup> | n          | % <sup>1</sup> |
| <b>Ethnic group</b>                        |               |                |               |                |               |                |               |                |               |                |            |                |
| White                                      | 3078          | 90.1           | 9685          | 81.2           | 15146         | 77.5           | 16052         | 80.7           | 9339          | 84.3           | 1527       | 86.6           |
| Non-white                                  | 275           | 9.9            | 1697          | 18.8           | 2920          | 22.5           | 2375          | 19.3           | 1044          | 15.8           | 153        | 13.4           |
| Missing                                    | 1             |                | 13            |                | 25            |                | 26            |                | 14            |                | 1          |                |
| <b>Understanding of English</b>            |               |                |               |                |               |                |               |                |               |                |            |                |
| Fluent                                     | 3254          | 96.7           | 10394         | 89.6           | 16757         | 90.0           | 17605         | 92.9           | 10155         | 96.3           | 1638       | 96.7           |
| Not fluent                                 | 94            | 3.3            | 948           | 10.4           | 1251          | 10.0           | 776           | 7.1            | 214           | 3.7            | 36         | 3.4            |
| Missing                                    | 6             |                | 53            |                | 83            |                | 72            |                | 28            |                | 7          |                |
| <b>Marital/partner status</b>              |               |                |               |                |               |                |               |                |               |                |            |                |
| Married/living with partner                | 1836          | 51.9           | 9550          | 81.8           | 16868         | 92.1           | 17782         | 96.1           | 10004         | 95.4           | 1591       | 94.4           |
| Single/unsupported by partner              | 1440          | 48.1           | 1677          | 18.2           | 1010          | 7.9            | 493           | 3.9            | 293           | 4.7            | 68         | 5.7            |
| Missing                                    | 78            |                | 168           |                | 213           |                | 178           |                | 100           |                | 22         |                |
| <b>BMI in pregnancy (kg/m<sup>2</sup>)</b> |               |                |               |                |               |                |               |                |               |                |            |                |
| < 18.5                                     | 184           | 6.2            | 426           | 4.2            | 413           | 2.6            | 337           | 2.1            | 156           | 1.5            | 18         | 0.2            |
| 18.5 - 24.9                                | 1753          | 50.3           | 5316          | 45.6           | 8560          | 45.9           | 9059          | 46.7           | 4864          | 44.5           | 802        | 46.4           |
| 25.0 - 29.9                                | 598           | 17.9           | 2558          | 21.7           | 4341          | 24.6           | 4206          | 23.2           | 2572          | 26.9           | 415        | 27.6           |
| 30.0 - 35.0                                | 233           | 7.6            | 1096          | 10.0           | 1627          | 9.3            | 1399          | 8.8            | 769           | 8.9            | 109        | 8.1            |
| Not recorded                               | 581           | 18.1           | 1969          | 18.4           | 3091          | 17.6           | 3389          | 19.2           | 2000          | 18.3           | 329        | 17.7           |
| Missing                                    | 5             |                | 30            |                | 59            |                | 63            |                | 36            |                | 8          |                |
| <b>IMD quintile</b>                        |               |                |               |                |               |                |               |                |               |                |            |                |
| 1 <sup>st</sup> (Least deprived)           | 245           | 6.8            | 1102          | 8.5            | 2875          | 13.8           | 4255          | 20.5           | 2783          | 24.6           | 434        | 26.0           |
| 2 <sup>nd</sup>                            | 405           | 12.3           | 1521          | 13.3           | 3259          | 17.5           | 4114          | 21.7           | 2434          | 22.3           | 396        | 22.0           |
| 3 <sup>rd</sup>                            | 637           | 18.2           | 2115          | 18.0           | 3657          | 18.6           | 3759          | 19.7           | 2135          | 20.0           | 357        | 21.6           |
| 4 <sup>th</sup>                            | 827           | 25.3           | 2784          | 23.9           | 3957          | 22.7           | 3479          | 19.8           | 1765          | 17.9           | 291        | 16.9           |
| 5 <sup>th</sup> (Most deprived)            | 1221          | 37.5           | 3821          | 36.2           | 4262          | 27.5           | 2759          | 18.4           | 1215          | 15.2           | 197        | 13.7           |
| Missing                                    | 19            |                | 52            |                | 81            |                | 87            |                | 65            |                | 6          |                |
| <b>Previous pregnancies ≥ 24 weeks</b>     |               |                |               |                |               |                |               |                |               |                |            |                |
| 0                                          | 2835          | 86.8           | 6341          | 62.0           | 8438          | 53.6           | 7307          | 46.7           | 2989          | 36.9           | 346        | 28.0           |

|                                                                          |      |      |      |      |      |      |      |      |      |      |     |      |
|--------------------------------------------------------------------------|------|------|------|------|------|------|------|------|------|------|-----|------|
| 1                                                                        | 474  | 12.1 | 3772 | 29.4 | 5892 | 29.9 | 6963 | 33.9 | 3929 | 35.5 | 540 | 32.3 |
| 2                                                                        | 38   | 0.8  | 1006 | 6.8  | 2549 | 10.9 | 2779 | 12.2 | 2260 | 17.4 | 414 | 20.2 |
| 3-5                                                                      | 7    | 0.3  | 276  | 1.9  | 1212 | 5.6  | 1404 | 7.2  | 1219 | 10.2 | 381 | 19.5 |
| Missing                                                                  |      |      |      |      |      |      |      |      |      |      |     |      |
| <b>Gestation at delivery (completed weeks)</b>                           |      |      |      |      |      |      |      |      |      |      |     |      |
| 37                                                                       | 119  | 4.1  | 351  | 3.5  | 530  | 3.6  | 534  | 3.5  | 275  | 3.1  | 52  | 3.2  |
| 38                                                                       | 305  | 11.0 | 1136 | 10.1 | 1743 | 9.9  | 1739 | 9.9  | 971  | 10.2 | 146 | 9.9  |
| 39                                                                       | 783  | 22.5 | 2788 | 24.4 | 4409 | 24.2 | 4439 | 23.5 | 2516 | 23.2 | 410 | 27.2 |
| 40                                                                       | 1292 | 36.7 | 4361 | 36.7 | 6970 | 36.2 | 7090 | 37.5 | 3933 | 35.9 | 639 | 35.0 |
| 41 - 42+0 days                                                           | 855  | 25.7 | 2759 | 25.3 | 4439 | 26.1 | 4651 | 25.6 | 2702 | 27.7 | 434 | 24.7 |
| <b>Planned place of birth</b>                                            |      |      |      |      |      |      |      |      |      |      |     |      |
| OU                                                                       | 1445 | 87.5 | 4150 | 84.9 | 5601 | 82.6 | 4946 | 80.7 | 2571 | 80.2 | 497 | 83.2 |
| AMU                                                                      | 1038 | 8.5  | 3445 | 9.6  | 4958 | 10.1 | 4540 | 10.3 | 2212 | 9.6  | 294 | 7.9  |
| FMU                                                                      | 661  | 3.2  | 2115 | 3.5  | 3242 | 3.8  | 3216 | 3.9  | 1674 | 3.8  | 249 | 3.0  |
| Home                                                                     | 210  | 0.8  | 1685 | 2.0  | 4290 | 3.5  | 5751 | 5.1  | 3940 | 6.4  | 641 | 5.8  |
| <b>Birth weight (grams)</b>                                              |      |      |      |      |      |      |      |      |      |      |     |      |
| < 2500                                                                   | 53   | 1.9  | 146  | 1.8  | 166  | 1.4  | 159  | 1.1  | 75   | 1.0  | 17  | 1.3  |
| 2500 - 2999                                                              | 561  | 18.4 | 1728 | 16.4 | 2281 | 14.5 | 1924 | 12.7 | 1100 | 12.5 | 168 | 12.8 |
| 3000 - 3499                                                              | 1502 | 44.6 | 4678 | 41.1 | 7171 | 39.3 | 6960 | 38.2 | 3644 | 36.5 | 596 | 37.1 |
| 3500 - 3999                                                              | 977  | 28.4 | 3664 | 30.9 | 6256 | 33.4 | 6767 | 35.0 | 3888 | 35.3 | 617 | 36.9 |
| 4000 - 4499                                                              | 233  | 6.0  | 1023 | 8.7  | 1926 | 10.0 | 2294 | 11.4 | 1432 | 12.5 | 239 | 9.9  |
| ≥ 4500                                                                   | 21   | 0.7  | 135  | 1.2  | 262  | 1.5  | 303  | 1.6  | 237  | 2.3  | 40  | 2.0  |
| Missing                                                                  | 7    |      | 21   |      | 29   |      | 46   |      | 21   |      | 4   |      |
| <b>Complicating conditions identified at the start of care in labour</b> |      |      |      |      |      |      |      |      |      |      |     |      |
| Prolonged rupture of membranes > 18 hours                                | 145  | 7.1  | 411  | 6.1  | 678  | 6.5  | 706  | 7.1  | 415  | 7.0  | 78  | 8.9  |
| Meconium stained liquor                                                  | 126  | 5.8  | 322  | 4.8  | 469  | 5.0  | 541  | 6.1  | 295  | 5.9  | 60  | 7.4  |
| Proteinuria 1+ or more                                                   | 79   | 2.3  | 203  | 1.7  | 261  | 1.9  | 226  | 1.6  | 109  | 1.7  | 20  | 1.6  |
| Hypertension                                                             | 55   | 2.6  | 160  | 2.2  | 232  | 2.4  | 207  | 2.0  | 102  | 2.1  | 17  | 2.0  |
| Abnormal vaginal bleeding                                                | 16   | 0.7  | 57   | 0.9  | 79   | 0.9  | 119  | 1.5  | 77   | 2.1  | 16  | 2.1  |

|                                   |            |             |             |             |             |             |             |             |             |             |            |             |
|-----------------------------------|------------|-------------|-------------|-------------|-------------|-------------|-------------|-------------|-------------|-------------|------------|-------------|
| Non-cephalic presentation         | 5          | 0.2         | 31          | 0.5         | 44          | 0.4         | 64          | 0.5         | 46          | 0.7         | 3          | 0.3         |
| Abnormal fetal heart rate         | 41         | 1.5         | 106         | 1.7         | 162         | 1.8         | 143         | 1.7         | 82          | 1.7         | 27         | 3.0         |
| Other complications               | 14         | 0.6         | 24          | 0.3         | 23          | 0.2         | 27          | 0.1         | 11          | 0.2         | 2          | 0.2         |
| <b>Any complicating condition</b> | <b>431</b> | <b>18.5</b> | <b>1175</b> | <b>16.1</b> | <b>1744</b> | <b>16.6</b> | <b>1829</b> | <b>18.0</b> | <b>1001</b> | <b>18.1</b> | <b>199</b> | <b>22.5</b> |

<sup>1</sup> Probability weights are incorporated to account for differences in the probability of a woman being selected for inclusion in the study arising from differences in each unit/trust's period of participation and the stratum specific probabilities of selection of OUs.

**Table 2 Association between maternal age (per 5-year increase) and maternal and perinatal outcomes in low risk women aged between 16 and 40 years old (inclusive)**

|                                          | Nulliparous women                           |             |                         |             | Multiparous women                          |             |                         |             |
|------------------------------------------|---------------------------------------------|-------------|-------------------------|-------------|--------------------------------------------|-------------|-------------------------|-------------|
|                                          | Unadjusted <sup>1</sup>                     |             | Adjusted <sup>1,2</sup> |             | Unadjusted <sup>1</sup>                    |             | Adjusted <sup>1,2</sup> |             |
|                                          | RR                                          | (95% CI)    | RR                      | (95% CI)    | RR                                         | (95% CI)    | RR                      | (95% CI)    |
| Maternal composite                       | 1.13                                        | (1.11-1.16) | 1.13                    | (1.11-1.16) | 1.07                                       | (1.03-1.13) | 1.08                    | (1.03-1.14) |
| OU                                       | 1.13                                        | (1.11-1.16) | 1.12                    | (1.10-1.15) |                                            |             |                         |             |
| Non-OU <sup>1,3</sup>                    | 1.22                                        | (1.19-1.26) | 1.21                    | (1.18-1.25) |                                            |             |                         |             |
|                                          | Wald test for interaction $P^{1,4} < 0.001$ |             |                         |             | Wald test for interaction $P^{1,4} = 0.34$ |             |                         |             |
| Augmentation                             | 1.13                                        | (1.09-1.16) | 1.12                    | (1.08-1.17) | 1.00                                       | (0.92-1.08) | 1.01                    | (0.92-1.11) |
| OU                                       | 1.13                                        | (1.09-1.17) | 1.12                    | (1.07-1.17) |                                            |             |                         |             |
| Non-OU <sup>1,3</sup>                    | 1.25                                        | (1.20-1.31) | 1.23                    | (1.18-1.28) |                                            |             |                         |             |
|                                          | Wald test for interaction $P^{1,4} < 0.001$ |             |                         |             | Wald test for interaction $P^{1,4} = 0.24$ |             |                         |             |
| Instrumental delivery                    | 1.20                                        | (1.13-1.26) | 1.18                    | (1.12-1.25) | 1.14                                       | (1.04-1.25) | 1.15                    | (1.05-1.27) |
|                                          | Wald test for interaction $P^{1,4} = 0.18$  |             |                         |             | Wald test for interaction $P^{1,4} = 0.06$ |             |                         |             |
| Intrapartum caesarean section            | 1.27                                        | (1.23-1.31) | 1.27                    | (1.23-1.32) | 1.16                                       | (1.07-1.26) | 1.16                    | (1.06-1.28) |
|                                          | Wald test for interaction $P^{1,4} = 0.26$  |             |                         |             | Wald test for interaction $P^{1,4} = 0.50$ |             |                         |             |
| General anaesthesia                      | 1.06                                        | (0.93-1.20) | 1.06                    | (0.92-1.22) | 1.05                                       | (0.87-1.27) | 1.09                    | (0.91-1.32) |
|                                          | Wald test for interaction $P^{1,4} = 0.83$  |             |                         |             | Wald test for interaction $P^{1,4} = 0.15$ |             |                         |             |
| Maternal blood transfusion               | 1.09                                        | (0.97-1.23) | 1.13                    | (0.95-1.34) | 1.23                                       | (0.95-1.60) | 1.24                    | (0.94-1.62) |
|                                          | Wald test for interaction $P^{1,4} = 0.38$  |             |                         |             | Wald test for interaction $P^{1,4} = 0.44$ |             |                         |             |
| Third/fourth degree perineal tear        | 1.17                                        | (1.09-1.27) | 1.12                    | (1.02-1.23) | 1.10                                       | (0.98-1.23) | 1.01                    | (0.89-1.15) |
|                                          | Wald test for interaction $P^{1,4} = 0.43$  |             |                         |             | Wald test for interaction $P^{1,4} = 0.29$ |             |                         |             |
| Maternal admission for higher level care | 1.28                                        | (1.03-1.58) | 1.46                    | (1.07-1.99) | 1.40                                       | (1.01-1.92) | 1.49                    | (1.06-2.10) |
|                                          | Wald test for interaction $P^{1,4} = 0.41$  |             |                         |             | Wald test for interaction $P^{1,4} = 0.15$ |             |                         |             |
| Perinatal composite                      | 1.07                                        | (0.97-1.17) | 1.06                    | (0.95-1.17) | 1.02                                       | (0.87-1.19) | 0.98                    | (0.84-1.15) |
|                                          | Wald test for interaction $P^{1,4} = 0.92$  |             |                         |             | Wald test for interaction $P^{1,4} = 0.66$ |             |                         |             |

<sup>1</sup> Probability weights are incorporated to account for differences in the probability of a woman being selected for inclusion in the study arising from differences in each unit/trust's period of participation and the stratum specific probabilities of selection of OUs.

1  
2  
3  
4  
5 <sup>2</sup> Adjusted for ethnic group, understanding of English, marital/partner status, BMI in pregnancy, index of multiple deprivation score quintile, gestation at  
6 delivery, and planned place of birth (OU vs. AMU vs. FMU vs. home).  
7

8 <sup>3</sup> Results in these rows were adjusted for ethnic group, understanding of English, marital/partner status, BMI in pregnancy, index of multiple deprivation  
9 score quintile, and gestation at delivery.  
10

11 <sup>4</sup> P for interaction, results in these rows were adjusted for ethnic group, understanding of English, marital/partner status, BMI in pregnancy, index of  
12 multiple deprivation score quintile, gestation at delivery, and planned place of birth (OU vs. non-OU).  
13  
14  
15  
16  
17  
18  
19  
20  
21  
22  
23  
24  
25  
26  
27  
28  
29  
30  
31  
32  
33  
34  
35  
36  
37  
38  
39  
40  
41  
42  
43  
44  
45  
46  
47  
48  
49

**Table 3 Intrapartum interventions and adverse maternal outcomes by maternal age in low risk nulliparous women aged 16 and over**

| Age (years)                          | Events / Births<br>n/N | OU                         |             | Events / Births<br>n/N | Non-OU                     |             |
|--------------------------------------|------------------------|----------------------------|-------------|------------------------|----------------------------|-------------|
|                                      |                        | Weighted <sup>1</sup><br>% | (95% CI)    |                        | Weighted <sup>1</sup><br>% | (95% CI)    |
| <b>Maternal composite</b>            |                        |                            |             |                        |                            |             |
| 16-19                                | 480/1239               | 39.4                       | (35.6-43.3) | 252/1553               | 17.5                       | (15.2-20.1) |
| 20-24                                | 1229/2577              | 47.9                       | (44.7-51.1) | 886/3679               | 24.2                       | (21.8-26.8) |
| 25-29                                | 1670/3003              | 55.6                       | (53.4-57.9) | 1680/5354              | 32.3                       | (29.5-35.2) |
| 30-34                                | 1402/2322              | 61.1                       | (57.3-64.8) | 1730/4897              | 36.6                       | (34.2-39.1) |
| 35-39                                | 622/957                | 65.5                       | (61.8-69.1) | 792/1995               | 39.9                       | (36.0-43.9) |
| 40+                                  | 108/148                | 71.9                       | (63.0-79.3) | 83/196                 | 44.8                       | (35.2-54.7) |
| Total                                | 5511/10246             | 54.4                       | (51.9-56.9) | 5423/17674             | 31.3                       | (29.3-33.4) |
| <b>Augmentation</b>                  |                        |                            |             |                        |                            |             |
| 16-19                                | 317/1245               | 25.9                       | (22.5-29.7) | 141/1564               | 8.6                        | (7.0-10.5)  |
| 20-24                                | 790/2584               | 30.7                       | (26.9-34.7) | 489/3706               | 12.9                       | (11.1-14.9) |
| 25-29                                | 1079/3011              | 35.7                       | (33.4-38.1) | 918/5372               | 17.4                       | (15.6-19.3) |
| 30-34                                | 867/2318               | 37.5                       | (34.1-41.1) | 964/4921               | 19.9                       | (18.3-21.7) |
| 35-39                                | 402/955                | 42.2                       | (36.4-48.1) | 473/2015               | 22.6                       | (19.8-25.7) |
| 40+                                  | 71/149                 | 47.6                       | (37.0-58.4) | 44/196                 | 23.7                       | (15.7-34.1) |
| Total                                | 3526/10262             | 34.6                       | (31.9-37.4) | 3029/17774             | 16.9                       | (15.7-18.1) |
| <b>Instrumental delivery</b>         |                        |                            |             |                        |                            |             |
| 16-19                                | 191/1266               | 15.1                       | (12.5-18.2) | 99/1568                | 7.9                        | (6.2-10.2)  |
| 20-24                                | 469/2618               | 17.9                       | (15.9-20.0) | 392/3717               | 10.6                       | (8.9-12.5)  |
| 25-29                                | 707/3039               | 23.4                       | (21.3-25.6) | 772/5391               | 15.0                       | (13.1-17.0) |
| 30-34                                | 591/2349               | 26.3                       | (21.3-32.1) | 795/4950               | 17.0                       | (15.2-19.1) |
| 35-39                                | 275/968                | 29.5                       | (25.0-34.4) | 401/2018               | 19.4                       | (15.9-23.6) |
| 40+                                  | 41/149                 | 30.4                       | (20.0-43.2) | 37/197                 | 21.0                       | (13.3-31.5) |
| Total                                | 2274/10389             | 22.5                       | (19.9-25.3) | 2496/17841             | 14.5                       | (13.0-16.0) |
| <b>Intrapartum caesarean section</b> |                        |                            |             |                        |                            |             |
| 16-19                                | 101/1266               | 8.3                        | (6.5-10.5)  | 55/1568                | 3.3                        | (2.5-4.2)   |
| 20-24                                | 313/2618               | 12.2                       | (10.4-14.2) | 194/3717               | 5.2                        | (4.2-6.5)   |
| 25-29                                | 461/3039               | 15.2                       | (13.3-17.2) | 408/5391               | 8.0                        | (6.9-9.3)   |
| 30-34                                | 466/2349               | 19.8                       | (17.5-22.3) | 452/4950               | 9.0                        | (7.9-10.4)  |
| 35-39                                | 223/968                | 23.0                       | (19.8-26.5) | 212/2018               | 11.2                       | (9.0-13.9)  |
| 40+                                  | 47/149                 | 29.2                       | (20.9-39.3) | 22/197                 | 9.7                        | (5.2-17.2)  |
| Total                                | 1611/10389             | 15.7                       | (14.1-17.5) | 1343/17841             | 7.6                        | (6.8-8.4)   |

<sup>1</sup> Probability weights are incorporated to account for differences in the probability of a woman being selected for inclusion in the study arising from differences in each unit/trust's period of participation and the stratum specific probabilities of selection of OUs.



**Table 4 Intrapartum interventions and adverse maternal outcomes by maternal age in low risk multiparous women aged 16 and over**

| Age (years)                          | Events / Births<br>n/N | OU                         |             | Events / Births<br>n/N | Non-OU                     |            |
|--------------------------------------|------------------------|----------------------------|-------------|------------------------|----------------------------|------------|
|                                      |                        | Weighted <sup>1</sup><br>% | (95% CI)    |                        | Weighted <sup>1</sup><br>% | (95% CI)   |
| <b>Maternal composite</b>            |                        |                            |             |                        |                            |            |
| 16-19                                | 35/177                 | 20.2                       | (14.1-28.0) | 20/338                 | 6.6                        | (4.1-10.6) |
| 20-24                                | 242/1506               | 16.2                       | (13.8-19.0) | 146/3486               | 4.6                        | (3.6-5.8)  |
| 25-29                                | 468/2504               | 18.9                       | (16.9-20.9) | 297/6989               | 4.8                        | (4.1-5.7)  |
| 30-34                                | 492/2548               | 19.2                       | (16.8-21.8) | 418/8440               | 5.4                        | (4.7-6.2)  |
| 35-39                                | 344/1575               | 21.9                       | (19.4-24.7) | 273/5737               | 5.6                        | (4.8-6.6)  |
| 40+                                  | 82/340                 | 24.1                       | (20.7-28.0) | 65/975                 | 7.4                        | (5.6-9.7)  |
| Total                                | 1663/8650              | 19.3                       | (17.6-21.1) | 1219/25965             | 5.3                        | (4.7-5.9)  |
| <b>Augmentation</b>                  |                        |                            |             |                        |                            |            |
| 16-19                                | 19/178                 | 10.5                       | (5.9-17.9)  | 11/340                 | 3.8                        | (2.0-7.1)  |
| 20-24                                | 144/1516               | 9.4                        | (7.5-11.8)  | 62/3520                | 2.0                        | (1.4-2.7)  |
| 25-29                                | 247/2529               | 9.9                        | (8.2-12.0)  | 109/7077               | 1.8                        | (1.4-2.3)  |
| 30-34                                | 255/2572               | 9.7                        | (8.0-11.7)  | 132/8535               | 1.6                        | (1.3-2.0)  |
| 35-39                                | 156/1592               | 9.8                        | (8.2-11.6)  | 89/5796                | 1.8                        | (1.3-2.5)  |
| 40+                                  | 42/345                 | 12.2                       | (9.5-15.5)  | 18/985                 | 1.8                        | (1.1-3.2)  |
| Total                                | 863/8732               | 9.8                        | (8.5-11.4)  | 421/26253              | 1.8                        | (1.5-2.1)  |
| <b>Instrumental delivery</b>         |                        |                            |             |                        |                            |            |
| 16-19                                | 12/179                 | 7.5                        | (3.6-14.9)  | 7/340                  | 3.1                        | (1.3-7.1)  |
| 20-24                                | 55/1530                | 3.6                        | (2.7-4.9)   | 38/3520                | 1.4                        | (1.0-2.0)  |
| 25-29                                | 139/2557               | 5.5                        | (4.6-6.5)   | 102/7092               | 1.8                        | (1.4-2.3)  |
| 30-34                                | 159/2594               | 6.1                        | (5.0-7.5)   | 124/8544               | 1.6                        | (1.2-2.0)  |
| 35-39                                | 102/1600               | 6.6                        | (5.0-8.6)   | 82/5802                | 1.8                        | (1.4-2.4)  |
| 40+                                  | 30/347                 | 8.8                        | (5.5-13.8)  | 17/987                 | 2.5                        | (1.3-4.7)  |
| Total                                | 497/8807               | 5.7                        | (4.9-6.7)   | 370/26285              | 1.7                        | (1.4-2.1)  |
| <b>Intrapartum caesarean section</b> |                        |                            |             |                        |                            |            |
| 16-19                                | 6/179                  | 3.4                        | (1.4-7.7)   | 4/340                  | 0.9                        | (0.3-2.5)  |
| 20-24                                | 62/1530                | 4.1                        | (2.6-6.3)   | 21/3520                | 0.6                        | (0.3-1.1)  |
| 25-29                                | 121/2557               | 4.8                        | (3.8-6.1)   | 48/7092                | 0.7                        | (0.5-0.9)  |
| 30-34                                | 134/2594               | 5.1                        | (4.0-6.5)   | 70/8544                | 0.9                        | (0.6-1.2)  |
| 35-39                                | 110/1600               | 6.8                        | (5.1-9.1)   | 53/5802                | 1.1                        | (0.8-1.5)  |
| 40+                                  | 16/347                 | 4.8                        | (3.1-7.4)   | 15/987                 | 1.5                        | (0.8-2.7)  |
| Total                                | 449/8807               | 5.1                        | (4.2-6.3)   | 211/26285              | 0.8                        | (0.7-1.1)  |

<sup>1</sup> Probability weights are incorporated to account for differences in the probability of a woman being selected for inclusion in the study arising from differences in each unit/trust's period of participation and the stratum specific probabilities of selection of OUs.

Table 5 Perinatal outcomes by maternal age in low risk women aged 16 and over

| Age (years)        | OU                     |                                     | Non-OU                 |                                     |
|--------------------|------------------------|-------------------------------------|------------------------|-------------------------------------|
|                    | Events / Births<br>n/N | Weighted <sup>1</sup><br>% (95% CI) | Events / Births<br>n/N | Weighted <sup>1</sup><br>% (95% CI) |
| <b>Nulliparous</b> |                        |                                     |                        |                                     |
| 16-19              | 39/1260                | 3.2 (2.2-4.5)                       | 31/1553                | 2.9 (1.9-4.4)                       |
| 20-24              | 89/2610                | 3.5 (2.5-5.0)                       | 94/3700                | 2.4 (1.9-3.2)                       |
| 25-29              | 92/3026                | 3.3 (2.6-4.0)                       | 123/5357               | 2.1 (1.7-2.8)                       |
| 30-34              | 101/2340               | 4.2 (3.1-5.6)                       | 128/4918               | 3.0 (2.2-4.0)                       |
| 35-39              | 37/962                 | 3.9 (2.8-5.4)                       | 65/1999                | 3.0 (2.1-4.1)                       |
| 40+                | 10/149                 | 7.5 (3.4-15.7)                      | 8/195                  | 3.9 (1.0-14.0)                      |
| Total              | 368/10347              | 3.7 (2.9-4.6)                       | 449/17722              | 2.6 (2.2-3.1)                       |
| <b>Multiparous</b> |                        |                                     |                        |                                     |
| 16-19              | 6/179                  | 3.0 (1.4-6.4)                       | 5/337                  | 1.7 (0.6-4.6)                       |
| 20-24              | 26/1519                | 1.8 (1.2-2.7)                       | 43/3489                | 1.3 (0.8-2.0)                       |
| 25-29              | 41/2547                | 1.6 (1.2-2.3)                       | 73/7032                | 1.1 (0.8-1.6)                       |
| 30-34              | 50/2578                | 2.0 (1.5-2.6)                       | 111/8468               | 1.2 (1.0-1.5)                       |
| 35-39              | 33/1594                | 2.1 (1.3-3.3)                       | 88/5761                | 1.6 (1.2-2.2)                       |
| 40+                | 7/345                  | 2.1 (0.9-4.6)                       | 20/978                 | 2.3 (1.3-4.1)                       |
| Total              | 163/8762               | 1.9 (1.5-2.4)                       | 340/26065              | 1.3 (1.1-1.6)                       |

<sup>1</sup> Probability weights are incorporated to account for differences in the probability of a woman being selected for inclusion in the study arising from differences in each unit/trust's period of participation and the stratum specific probabilities of selection of OUs.

## Table of Contents

|                                                                                                                                                                                                                              |    |
|------------------------------------------------------------------------------------------------------------------------------------------------------------------------------------------------------------------------------|----|
| Figure S1 Association between maternal age and less common intrapartum interventions and adverse maternal outcomes in low risk women aged 16 and over .....                                                                  | 2  |
| Figure S2 Association between maternal age and epidural in low risk women aged 16 and over .....                                                                                                                             | 3  |
| Table S1 Categorisation of potential confounders .....                                                                                                                                                                       | 4  |
| Table S2 Characteristics of low risk nulliparous women aged 16 and over by maternal age category..                                                                                                                           | 5  |
| Table S3 Characteristics of low risk multiparous women aged 16 and over by maternal age category                                                                                                                             | 7  |
| Table S4 Sample size of low risk women aged 40 and over by planned place of birth and parity .....                                                                                                                           | 9  |
| Table S5 Less common intrapartum interventions and adverse maternal outcomes by maternal age in low risk nulliparous women aged 16 and over .....                                                                            | 10 |
| Table S6 Less common intrapartum interventions and adverse maternal outcomes by maternal age in low risk multiparous women aged 16 and over.....                                                                             | 11 |
| Table S7 Association between maternal age and intrapartum interventions and adverse maternal outcomes in low risk women aged between 16 and 40 years old (inclusive) additionally adjusted for complicating conditions ..... | 12 |
| Table S8 Event rates in restricted sample of nulliparous women aged 16 and over without complicating conditions identified at the start of care in labour .....                                                              | 13 |
| Table S9 Event rates in restricted sample of multiparous women aged 16 and over without complicating conditions identified at the start of care in labour .....                                                              | 14 |

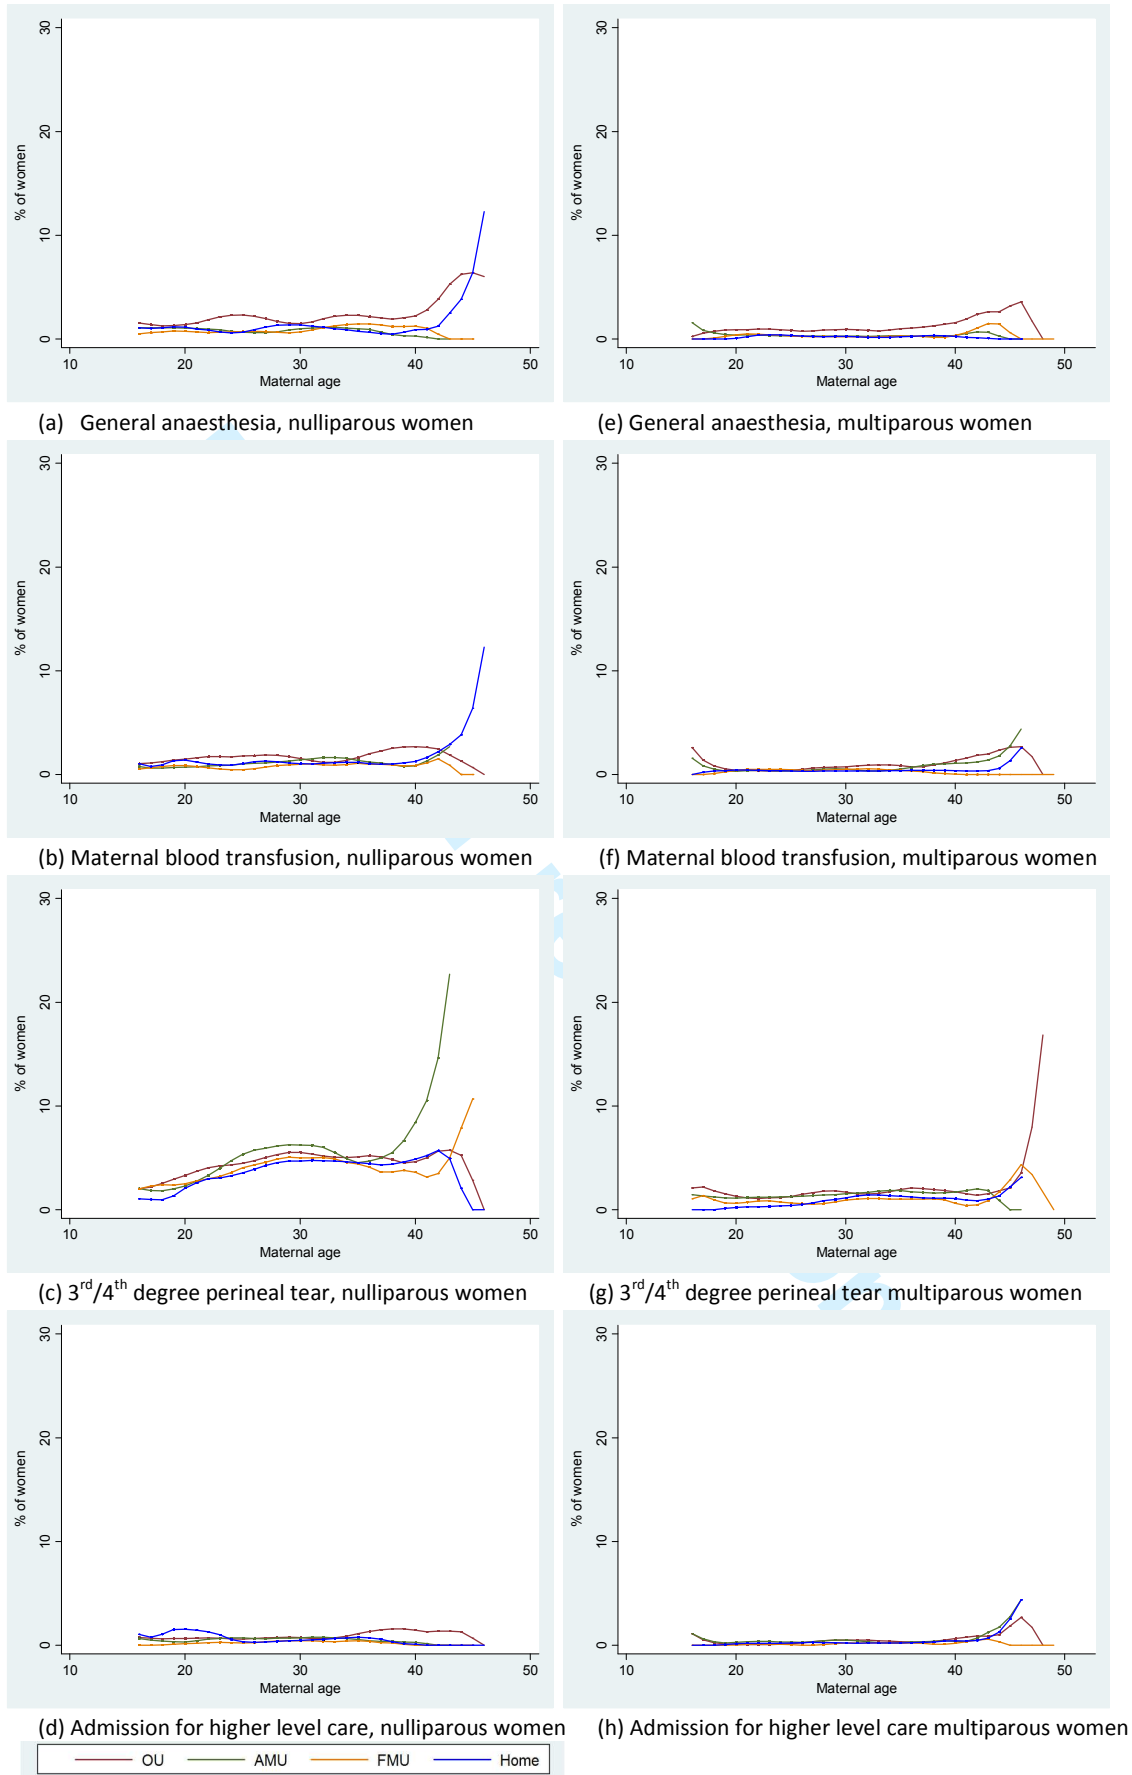

Figure S1 Association between maternal age and less common intrapartum interventions and adverse maternal outcomes in low risk women aged 16 and over

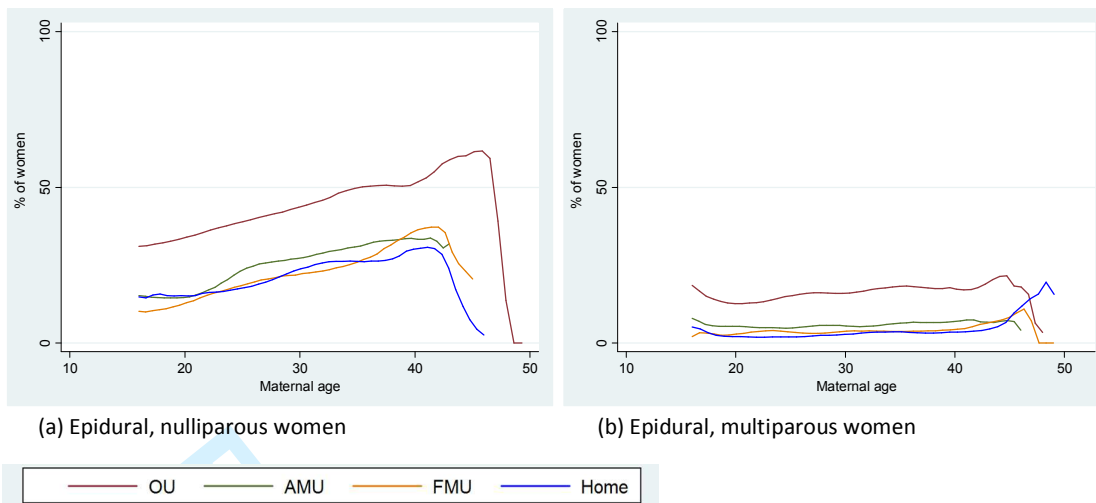

Figure S2 Association between maternal age and epidural in low risk women aged 16 and over

Table S1 Categorisation of potential confounders

| Covariate                                                         | Response categories                                                                                                                                                                 | Alternative categories in case of few events                                                   |
|-------------------------------------------------------------------|-------------------------------------------------------------------------------------------------------------------------------------------------------------------------------------|------------------------------------------------------------------------------------------------|
| Ethnic group                                                      | 1 White<br>2 Non-white                                                                                                                                                              |                                                                                                |
| Understanding of English                                          | 1 Fluent<br>2 Not fluent (some/none)                                                                                                                                                |                                                                                                |
| Marital/partner status                                            | 1 Married/living with partner<br>2 Single/unsupported by partner                                                                                                                    |                                                                                                |
| BMI in pregnancy (kg/m <sup>2</sup> )                             | 1 Less than 18.5<br>2 18.5 to 24.9<br>3 25.0 to 29.9<br>4 30.0 to 35.0<br>5 Not recorded                                                                                            |                                                                                                |
| Index of Multiple Deprivation (IMD) quintile                      | 1 1 <sup>st</sup> quintile (least deprived)<br>2 2 <sup>nd</sup> quintile<br>3 3 <sup>rd</sup> quintile<br>4 4 <sup>th</sup> quintile<br>5 5 <sup>th</sup> quintile (most deprived) | 1 1 <sup>st</sup> to 3 <sup>rd</sup> quintile<br>2 4 <sup>th</sup> to 5 <sup>th</sup> quintile |
| Previous pregnancies ≥24 weeks                                    | 1 0 Nulliparous<br>2 1 previous<br>3 2 previous<br>4 3 or more previous                                                                                                             | 1 Nulliparous<br>2 Multiparous                                                                 |
| Gestation at delivery (completed weeks)                           | 1 37 weeks<br>2 38 weeks<br>3 39 weeks<br>4 40 weeks<br>5 41 weeks to 42 weeks+0 days                                                                                               | 1 37 - 39 weeks<br>2 ≥ 40 weeks                                                                |
| Planned place of birth                                            | 1 Obstetric unit<br>2 Alongside midwifery unit<br>3 Freestanding midwifery unit<br>4 Home                                                                                           |                                                                                                |
| Complicating conditions identified at the start of care in labour | 1 No complicating conditions<br>2 One or more complicating conditions                                                                                                               |                                                                                                |

Table S2 Characteristics of low risk nulliparous women aged 16 and over by maternal age category

|                                                | 16 - 19 years<br>n=2835 |                | 20 - 24 years<br>n=6341 |                | 25 - 29 years<br>n=8438 |                | 30 - 34 years<br>n=7307 |                | 35 - 39 years<br>n=2989 |                | ≥ 40 years<br>n=346 |                |
|------------------------------------------------|-------------------------|----------------|-------------------------|----------------|-------------------------|----------------|-------------------------|----------------|-------------------------|----------------|---------------------|----------------|
|                                                | n                       | % <sup>1</sup> | n                   | % <sup>1</sup> |
| <b>Ethnic group</b>                            |                         |                |                         |                |                         |                |                         |                |                         |                |                     |                |
| White                                          | 2600                    | 90.4           | 5329                    | 80.6           | 7085                    | 78.5           | 6434                    | 82.7           | 2686                    | 86.0           | 314                 | 86.1           |
| Non-white                                      | 234                     | 9.6            | 1004                    | 19.4           | 1340                    | 21.5           | 859                     | 17.3           | 298                     | 14.0           | 31                  | 13.9           |
| Missing                                        | 1                       |                | 8                       |                | 13                      |                | 14                      |                | 5                       |                | 1                   |                |
| <b>Understanding of English</b>                |                         |                |                         |                |                         |                |                         |                |                         |                |                     |                |
| Fluent                                         | 2749                    | 96.8           | 5709                    | 88.6           | 7757                    | 89.8           | 6999                    | 94.4           | 2931                    | 97.5           | 341                 | 98.7           |
| Not fluent                                     | 81                      | 3.2            | 602                     | 11.4           | 636                     | 10.2           | 276                     | 5.7            | 48                      | 2.5            | 3                   | 1.3            |
| Missing                                        | 5                       |                | 30                      |                | 45                      |                | 32                      |                | 10                      |                | 2                   |                |
| <b>Marital/partner status</b>                  |                         |                |                         |                |                         |                |                         |                |                         |                |                     |                |
| Married/living with partner                    | 1484                    | 50.2           | 5171                    | 80.1           | 7869                    | 92.2           | 7015                    | 95.9           | 2854                    | 94.9           | 320                 | 92.8           |
| Single/unsupported by partner                  | 1284                    | 49.8           | 1072                    | 19.9           | 474                     | 7.8            | 217                     | 4.1            | 97                      | 5.1            | 23                  | 7.3            |
| Missing                                        | 67                      |                | 98                      |                | 95                      |                | 75                      |                | 38                      |                | 3                   |                |
| <b>BMI in pregnancy (kg/m<sup>2</sup>)</b>     |                         |                |                         |                |                         |                |                         |                |                         |                |                     |                |
| < 18.5                                         | 163                     | 6.2            | 237                     | 3.9            | 183                     | 2.6            | 140                     | 2.2            | 49                      | 1.6            | 0                   | 0.0            |
| 18.5 - 24.9                                    | 1510                    | 51.0           | 3136                    | 47.8           | 4216                    | 47.2           | 3813                    | 48.7           | 1441                    | 46.0           | 170                 | 44.8           |
| 25.0 - 29.9                                    | 494                     | 18.1           | 1358                    | 20.9           | 1897                    | 23.6           | 1528                    | 21.7           | 682                     | 25.6           | 74                  | 24.3           |
| 30.0 - 35.0                                    | 189                     | 7.1            | 535                     | 9.0            | 641                     | 8.3            | 438                     | 7.6            | 192                     | 8.1            | 21                  | 8.0            |
| Not recorded                                   | 477                     | 17.7           | 1059                    | 18.4           | 1477                    | 18.3           | 1363                    | 19.9           | 616                     | 18.8           | 80                  | 22.9           |
| Missing                                        | 2                       |                | 16                      |                | 24                      |                | 25                      |                | 9                       |                | 1                   |                |
| <b>IMD quintile</b>                            |                         |                |                         |                |                         |                |                         |                |                         |                |                     |                |
| 1 <sup>st</sup> (Least deprived)               | 212                     | 7.2            | 670                     | 9.2            | 1475                    | 14.5           | 1667                    | 21.4           | 741                     | 22.8           | 89                  | 26.9           |
| 2 <sup>nd</sup>                                | 356                     | 12.6           | 940                     | 14.5           | 1690                    | 19.7           | 1641                    | 22.1           | 689                     | 22.0           | 89                  | 23.8           |
| 3 <sup>rd</sup>                                | 538                     | 17.7           | 1239                    | 18.9           | 1769                    | 19.3           | 1544                    | 20.7           | 633                     | 21.1           | 69                  | 20.0           |
| 4 <sup>th</sup>                                | 689                     | 25.3           | 1525                    | 23.6           | 1808                    | 22.7           | 1455                    | 20.7           | 558                     | 20.3           | 56                  | 16.9           |
| 5 <sup>th</sup> (Most deprived)                | 1025                    | 37.2           | 1932                    | 33.8           | 1663                    | 23.7           | 972                     | 15.2           | 353                     | 13.9           | 40                  | 12.5           |
| Missing                                        | 15                      |                | 35                      |                | 33                      |                | 28                      |                | 15                      |                | 3                   |                |
| <b>Gestation at delivery (completed weeks)</b> |                         |                |                         |                |                         |                |                         |                |                         |                |                     |                |
| 37                                             | 93                      | 3.7            | 189                     | 3.4            | 275                     | 4.0            | 243                     | 3.7            | 90                      | 3.2            | 9                   | 2.4            |
| 38                                             | 255                     | 10.9           | 631                     | 10.1           | 813                     | 9.8            | 717                     | 9.6            | 287                     | 9.3            | 29                  | 6.0            |
| 39                                             | 649                     | 21.9           | 1462                    | 23.5           | 1989                    | 23.3           | 1652                    | 22.2           | 700                     | 23.3           | 76                  | 23.6           |
| 40                                             | 1075                    | 36.5           | 2393                    | 36.3           | 3107                    | 34.3           | 2688                    | 36.6           | 1076                    | 35.0           | 132                 | 36.5           |
| 41 - 42+0 days                                 | 763                     | 27.1           | 1666                    | 26.8           | 2254                    | 28.6           | 2007                    | 27.9           | 836                     | 29.2           | 100                 | 31.6           |

1  
2  
3  
4  
5  
6  
7  
8  
9  
10  
11  
12  
13  
14  
15  
16  
17  
18  
19  
20  
21  
22  
23  
24  
25  
26  
27  
28  
29  
30  
31  
32  
33  
34  
35  
36  
37  
38  
39  
40  
41  
42  
43  
44  
45  
46  
47  
48  
49

|                                                                          |            |             |            |             |             |             |             |             |            |             |           |             |
|--------------------------------------------------------------------------|------------|-------------|------------|-------------|-------------|-------------|-------------|-------------|------------|-------------|-----------|-------------|
| <b>Planned place of birth</b>                                            |            |             |            |             |             |             |             |             |            |             |           |             |
| OU                                                                       | 1266       | 88.0        | 2620       | 86.6        | 3043        | 85.0        | 2351        | 83.5        | 968        | 84.4        | 149       | 89.2        |
| AMU                                                                      | 882        | 8.4         | 2040       | 9.3         | 2535        | 9.7         | 1984        | 10.0        | 752        | 9.2         | 56        | 5.9         |
| FMU                                                                      | 564        | 3.2         | 1235       | 3.3         | 1531        | 3.3         | 1302        | 3.4         | 456        | 2.7         | 47        | 2.0         |
| Home                                                                     | 123        | 0.5         | 446        | 0.8         | 1329        | 2.0         | 1670        | 3.2         | 813        | 3.7         | 94        | 3.0         |
| <b>Birth weight (grams)</b>                                              |            |             |            |             |             |             |             |             |            |             |           |             |
| < 2500                                                                   | 46         | 2.0         | 105        | 2.1         | 88          | 1.4         | 87          | 1.3         | 43         | 1.5         | 6         | 1.9         |
| 2500 - 2999                                                              | 470        | 17.8        | 1053       | 17.4        | 1209        | 16.0        | 914         | 14.1        | 453        | 16.2        | 48        | 10.9        |
| 3000 - 3499                                                              | 1286       | 44.7        | 2709       | 43.0        | 3536        | 41.1        | 3053        | 41.0        | 1167       | 38.8        | 139       | 43.0        |
| 3500 - 3999                                                              | 826        | 28.8        | 1913       | 28.9        | 2782        | 31.8        | 2481        | 33.4        | 997        | 32.1        | 110       | 32.3        |
| 4000 - 4499                                                              | 185        | 6.0         | 487        | 7.6         | 734         | 8.5         | 669         | 8.7         | 282        | 10.0        | 38        | 9.2         |
| ≥ 4500                                                                   | 15         | 0.7         | 64         | 0.9         | 77          | 1.1         | 82          | 1.5         | 40         | 1.5         | 5         | 2.7         |
| Missing                                                                  | 7          |             | 10         |             | 12          |             | 21          |             | 7          |             | 0         |             |
| <b>Complicating conditions identified at the start of care in labour</b> |            |             |            |             |             |             |             |             |            |             |           |             |
| Prolonged rupture of membranes > 18 hours                                | 130        | 7.2         | 293        | 7.4         | 457         | 8.7         | 466         | 10.6        | 209        | 10.8        | 34        | 14.7        |
| Meconium stained liquor                                                  | 112        | 5.9         | 220        | 5.6         | 285         | 6.0         | 286         | 7.4         | 127        | 7.6         | 16        | 6.1         |
| Proteinuria 1+ or more                                                   | 73         | 2.4         | 150        | 2.1         | 161         | 2.4         | 129         | 2.0         | 49         | 2.5         | 8         | 3.5         |
| Hypertension                                                             | 51         | 2.8         | 128        | 2.9         | 156         | 3.2         | 127         | 2.8         | 48         | 3.6         | 10        | 5.0         |
| Abnormal vaginal bleeding                                                | 16         | 0.8         | 38         | 1.0         | 54          | 1.2         | 66          | 1.8         | 42         | 3.3         | 7         | 2.9         |
| Non-cephalic presentation                                                | 5          | 0.2         | 20         | 0.5         | 29          | 0.4         | 38          | 0.7         | 18         | 0.7         | 1         | 0.5         |
| Abnormal fetal heart rate                                                | 35         | 1.5         | 79         | 2.1         | 108         | 2.3         | 83          | 2.1         | 41         | 2.6         | 9         | 3.7         |
| Other complications                                                      | 14         | 0.6         | 15         | 0.3         | 16          | 0.2         | 14          | 0.2         | 5          | 0.3         | 0         | 0.0         |
| <b>Any complicating conditions</b>                                       | <b>390</b> | <b>19.0</b> | <b>825</b> | <b>19.1</b> | <b>1112</b> | <b>21.0</b> | <b>1073</b> | <b>24.1</b> | <b>465</b> | <b>25.7</b> | <b>73</b> | <b>32.2</b> |

<sup>1</sup>Probability weights are incorporated to account for differences in the probability of a woman being selected for inclusion in the study arising from differences in each unit/trust’s period of participation and the stratum specific probabilities of selection of OUs.



Table S3 Characteristics of low risk multiparous women aged 16 and over by maternal age category

|                                            | 16-19 years |                | 20 - 24 years |                | 25 - 29 years |                | 30 - 34 years |                | 35 - 39 years |                | ≥ 40 years |                |
|--------------------------------------------|-------------|----------------|---------------|----------------|---------------|----------------|---------------|----------------|---------------|----------------|------------|----------------|
|                                            | n           | % <sup>1</sup> | n             | % <sup>1</sup> | n             | % <sup>1</sup> | n             | % <sup>1</sup> | n             | % <sup>1</sup> | n          | % <sup>1</sup> |
| <b>Ethnic group</b>                        |             |                |               |                |               |                |               |                |               |                |            |                |
| White                                      | 478         | 88.2           | 4356          | 82.1           | 8061          | 76.3           | 9618          | 78.9           | 6653          | 83.2           | 1213       | 86.8           |
| Non-white                                  | 41          | 11.8           | 693           | 17.9           | 1580          | 23.7           | 1516          | 21.1           | 746           | 16.8           | 122        | 13.2           |
| Missing                                    | 0           |                | 5             |                | 12            |                | 12            |                | 9             |                | 0          |                |
| <b>Understanding of English</b>            |             |                |               |                |               |                |               |                |               |                |            |                |
| Fluent                                     | 505         | 96.3           | 4685          | 91.3           | 9000          | 90.3           | 10606         | 91.7           | 7224          | 95.6           | 1297       | 95.9           |
| Not fluent                                 | 13          | 3.8            | 346           | 8.8            | 615           | 9.7            | 500           | 8.3            | 166           | 4.5            | 33         | 4.1            |
| Missing                                    | 1           |                | 23            |                | 38            |                | 40            |                | 18            |                | 5          |                |
| <b>Marital/partner status</b>              |             |                |               |                |               |                |               |                |               |                |            |                |
| Married/living with partner                | 352         | 63.0           | 4379          | 84.5           | 8999          | 92.0           | 10767         | 96.3           | 7150          | 95.6           | 1271       | 95.0           |
| Single/unsupported by partner              | 156         | 37.1           | 605           | 15.5           | 536           | 8.0            | 276           | 3.7            | 196           | 4.4            | 45         | 5.0            |
| Missing                                    | 11          |                | 70            |                | 118           |                | 103           |                | 62            |                | 19         |                |
| <b>BMI in pregnancy (kg/m<sup>2</sup>)</b> |             |                |               |                |               |                |               |                |               |                |            |                |
| < 18.5                                     | 21          | 5.9            | 189           | 4.6            | 230           | 2.6            | 197           | 2.0            | 107           | 1.5            | 18         | 0.3            |
| 18.5 - 24.9                                | 243         | 45.8           | 2180          | 42.2           | 4344          | 44.4           | 5246          | 45.0           | 3423          | 43.7           | 632        | 47.0           |
| 25.0 - 29.9                                | 104         | 17.2           | 1200          | 23.1           | 2444          | 25.7           | 2678          | 24.6           | 1890          | 27.6           | 341        | 28.9           |
| 30.0 - 35.0                                | 44          | 10.4           | 561           | 11.7           | 986           | 10.5           | 961           | 10.0           | 577           | 9.3            | 88         | 8.1            |
| Not recorded                               | 104         | 20.7           | 910           | 18.5           | 1614          | 16.9           | 2026          | 18.5           | 1384          | 17.9           | 249        | 15.7           |
| Missing                                    | 3           |                | 14            |                | 35            |                | 38            |                | 27            |                | 7          |                |
| <b>IMD quintile</b>                        |             |                |               |                |               |                |               |                |               |                |            |                |
| 1 <sup>st</sup> (Least deprived)           | 33          | 3.6            | 432           | 7.4            | 1400          | 13.0           | 2588          | 19.6           | 2042          | 25.7           | 345        | 25.6           |
| 2 <sup>nd</sup>                            | 49          | 10.0           | 581           | 11.4           | 1569          | 15.0           | 2473          | 21.4           | 1745          | 22.4           | 307        | 21.3           |
| 3 <sup>rd</sup>                            | 99          | 21.2           | 876           | 16.4           | 1888          | 17.7           | 2215          | 19.0           | 1502          | 19.4           | 288        | 22.2           |
| 4 <sup>th</sup>                            | 138         | 25.6           | 1259          | 24.6           | 2149          | 22.6           | 2024          | 18.9           | 1207          | 16.5           | 235        | 16.8           |
| 5 <sup>th</sup> (Most deprived)            | 196         | 39.6           | 1889          | 40.2           | 2599          | 31.7           | 1787          | 21.1           | 862           | 16.0           | 157        | 14.1           |
| Missing                                    | 4           |                | 17            |                | 48            |                | 59            |                | 50            |                | 3          |                |
| <b>Previous pregnancies ≥ 24 weeks</b>     |             |                |               |                |               |                |               |                |               |                |            |                |
| 1                                          | 474         | 91.6           | 3772          | 77.1           | 5892          | 64.5           | 6963          | 63.6           | 3929          | 56.3           | 540        | 44.9           |
| 2                                          | 38          | 6.3            | 1006          | 17.9           | 2549          | 23.4           | 2779          | 22.9           | 2260          | 27.5           | 414        | 28.0           |
| 3-5                                        | 7           | 2.2            | 276           | 5.0            | 1212          | 12.1           | 1404          | 13.5           | 1219          | 16.2           | 381        | 27.1           |

|                                                                          |           |             |            |             |            |             |            |             |            |             |            |             |
|--------------------------------------------------------------------------|-----------|-------------|------------|-------------|------------|-------------|------------|-------------|------------|-------------|------------|-------------|
| <b>Gestation at delivery (completed weeks)</b>                           |           |             |            |             |            |             |            |             |            |             |            |             |
| 37                                                                       | 26        | 6.9         | 162        | 3.8         | 255        | 3.2         | 291        | 3.4         | 185        | 3.0         | 43         | 3.6         |
| 38                                                                       | 50        | 12.3        | 505        | 10.0        | 930        | 10.0        | 1022       | 10.3        | 684        | 10.8        | 117        | 11.4        |
| 39                                                                       | 134       | 26.5        | 1326       | 26.0        | 2420       | 25.2        | 2787       | 24.5        | 1816       | 23.1        | 334        | 28.6        |
| 40                                                                       | 217       | 37.7        | 1968       | 37.4        | 3863       | 38.4        | 4402       | 38.2        | 2857       | 36.3        | 507        | 34.4        |
| 41 - 42+0 days                                                           | 92        | 16.7        | 1093       | 22.8        | 2185       | 23.2        | 2644       | 23.6        | 1866       | 26.8        | 334        | 22.0        |
| <b>Planned place of birth</b>                                            |           |             |            |             |            |             |            |             |            |             |            |             |
| OU                                                                       | 179       | 84.6        | 1530       | 82.2        | 2558       | 79.8        | 2595       | 78.3        | 1603       | 77.7        | 348        | 80.9        |
| AMU                                                                      | 156       | 9.6         | 1405       | 10.0        | 2423       | 10.6        | 2556       | 10.5        | 1460       | 9.8         | 238        | 8.7         |
| FMU                                                                      | 97        | 3.4         | 880        | 3.9         | 1711       | 4.4         | 1914       | 4.4         | 1218       | 4.5         | 202        | 3.4         |
| Home                                                                     | 87        | 2.5         | 1239       | 3.9         | 2961       | 5.3         | 4081       | 6.7         | 3127       | 8.0         | 547        | 6.9         |
| <b>Birth weight (grams)</b>                                              |           |             |            |             |            |             |            |             |            |             |            |             |
| < 2500                                                                   | 7         | 0.8         | 41         | 1.3         | 78         | 1.3         | 72         | 1.0         | 32         | 0.7         | 11         | 1.1         |
| 2500 - 2999                                                              | 91        | 22.7        | 675        | 14.6        | 1072       | 12.7        | 1010       | 11.5        | 647        | 10.3        | 120        | 13.5        |
| 3000 - 3499                                                              | 216       | 44.0        | 1969       | 37.9        | 3635       | 37.3        | 3907       | 35.8        | 2477       | 35.2        | 457        | 34.9        |
| 3500 - 3999                                                              | 151       | 26.0        | 1751       | 34.0        | 3474       | 35.2        | 4286       | 36.3        | 2891       | 37.1        | 507        | 38.7        |
| 4000 - 4499                                                              | 48        | 6.1         | 536        | 10.6        | 1192       | 11.6        | 1625       | 13.8        | 1150       | 14.0        | 201        | 10.1        |
| ≥ 4500                                                                   | 6         | 0.5         | 71         | 1.7         | 185        | 1.9         | 221        | 1.6         | 197        | 2.8         | 35         | 1.8         |
| Missing                                                                  | 0         |             | 11         |             | 17         |             | 25         |             | 14         |             | 4          |             |
| <b>Complicating conditions identified at the start of care in labour</b> |           |             |            |             |            |             |            |             |            |             |            |             |
| Prolonged rupture of membranes > 18 hours                                | 15        | 6.1         | 118        | 4.0         | 221        | 4.0         | 240        | 4.0         | 206        | 4.8         | 44         | 6.6         |
| Meconium stained liquor                                                  | 14        | 5.6         | 102        | 3.7         | 184        | 3.8         | 255        | 4.9         | 168        | 4.9         | 44         | 7.9         |
| Proteinuria 1+ or more                                                   | 6         | 1.9         | 53         | 0.9         | 100        | 1.3         | 97         | 1.2         | 60         | 1.2         | 12         | 0.9         |
| Hypertension                                                             | 4         | 1.6         | 32         | 0.9         | 76         | 1.5         | 80         | 1.4         | 54         | 1.2         | 7          | 0.8         |
| Abnormal vaginal bleeding                                                | 0         | 0.0         | 19         | 0.8         | 25         | 0.5         | 53         | 1.2         | 35         | 1.4         | 9          | 1.8         |
| Non-cephalic presentation                                                | 0         | 0.0         | 11         | 0.4         | 15         | 0.3         | 26         | 0.4         | 28         | 0.8         | 2          | 0.3         |
| Abnormal fetal heart rate                                                | 6         | 1.9         | 27         | 1.0         | 54         | 1.2         | 60         | 1.3         | 41         | 1.2         | 18         | 2.8         |
| Other complications                                                      | 0         | 0.0         | 9          | 0.3         | 7          | 0.2         | 13         | 0.1         | 6          | 0.2         | 2          | 0.3         |
| <b>Any complicating conditions</b>                                       | <b>41</b> | <b>15.5</b> | <b>350</b> | <b>11.2</b> | <b>632</b> | <b>11.5</b> | <b>756</b> | <b>12.7</b> | <b>536</b> | <b>13.6</b> | <b>126</b> | <b>18.7</b> |

<sup>1</sup> Probability weights are incorporated to account for differences in the probability of a woman being selected for inclusion in the study arising from differences in each unit/trust's period of participation and the stratum specific probabilities of selection of OUs.

Table S4 Sample size of low risk women aged 40 and over by planned place of birth and parity

| Age (years)  | Nulliparous women |           |           |           | Multiparous women |            |            |            |
|--------------|-------------------|-----------|-----------|-----------|-------------------|------------|------------|------------|
|              | OU                | AMU       | FMU       | Home      | OU                | AMU        | FMU        | Home       |
| 40           | 64                | 32        | 24        | 38        | 157               | 103        | 93         | 242        |
| 41           | 31                | 17        | 11        | 26        | 86                | 63         | 47         | 147        |
| 42           | 24                | 6         | 3         | 13        | 53                | 39         | 25         | 83         |
| 43           | 12                | 1         | 2         | 10        | 29                | 18         | 22         | 37         |
| 44           | 14                | 0         | 4         | 4         | 12                | 10         | 10         | 23         |
| 45           | 2                 | 0         | 3         | 2         | 4                 | 4          | 2          | 9          |
| 46           | 1                 | 0         | 0         | 1         | 5                 | 1          | 1          | 5          |
| 47           | 0                 | 0         | 0         | 0         | 1                 | 0          | 1          | 0          |
| 48           | 0                 | 0         | 0         | 0         | 1                 | 0          | 0          | 0          |
| 49           | 0                 | 0         | 0         | 0         | 0                 | 0          | 1          | 0          |
| 50           | 1                 | 0         | 0         | 0         | 0                 | 0          | 0          | 0          |
| 51           | 0                 | 0         | 0         | 0         | 0                 | 0          | 0          | 0          |
| 52           | 0                 | 0         | 0         | 0         | 0                 | 0          | 0          | 1          |
| <b>Total</b> | <b>149</b>        | <b>56</b> | <b>47</b> | <b>94</b> | <b>348</b>        | <b>238</b> | <b>202</b> | <b>547</b> |

**Table S5 Less common intrapartum interventions and adverse maternal outcomes by maternal age in low risk nulliparous women aged 16 and over**

| Age (years)                                               | OU                     |                                     |  | Non-OU                 |                                     |  |
|-----------------------------------------------------------|------------------------|-------------------------------------|--|------------------------|-------------------------------------|--|
|                                                           | Events / Births<br>n/N | Weighted <sup>1</sup><br>% (95% CI) |  | Events / Births<br>n/N | Weighted <sup>1</sup><br>% (95% CI) |  |
| <b>General anaesthesia</b>                                |                        |                                     |  |                        |                                     |  |
| 16-19                                                     | 17/1251                | 1.4 (0.8-2.4)                       |  | 14/1562                | 0.8 (0.4-1.5)                       |  |
| 20-24                                                     | 47/2587                | 1.8 (1.4-2.4)                       |  | 31/3698                | 0.9 (0.6-1.4)                       |  |
| 25-29                                                     | 58/2984                | 1.9 (1.5-2.5)                       |  | 41/5349                | 0.8 (0.5-1.3)                       |  |
| 30-34                                                     | 44/2312                | 1.8 (1.3-2.7)                       |  | 57/4900                | 1.3 (0.9-1.9)                       |  |
| 35-39                                                     | 20/949                 | 2.0 (1.2-3.5)                       |  | 16/2001                | 0.9 (0.4-1.9)                       |  |
| 40+                                                       | 5/143                  | 3.0 (1.2-7.6)                       |  | 2/195                  | 0.6 (0.1-2.5)                       |  |
| Total                                                     | 191/10226              | 1.9 (1.5-2.3)                       |  | 161/17705              | 1.0 (0.8-1.2)                       |  |
| <b>Maternal blood transfusion</b>                         |                        |                                     |  |                        |                                     |  |
| 16-19                                                     | 13/1260                | 1.1 (0.7-1.9)                       |  | 10/1555                | 0.6 (0.3-1.2)                       |  |
| 20-24                                                     | 47/2606                | 1.8 (1.4-2.5)                       |  | 29/3697                | 0.8 (0.6-1.2)                       |  |
| 25-29                                                     | 57/3024                | 1.8 (1.2-2.6)                       |  | 54/5359                | 1.0 (0.8-1.3)                       |  |
| 30-34                                                     | 27/2335                | 1.2 (0.8-1.8)                       |  | 64/4923                | 1.7 (1.2-2.5)                       |  |
| 35-39                                                     | 21/961                 | 2.3 (1.3-3.9)                       |  | 21/2002                | 1.2 (0.7-2.1)                       |  |
| 40+                                                       | 4/149                  | 2.8 (1.1-6.8)                       |  | 5/196                  | 1.6 (0.5-4.6)                       |  |
| Total                                                     | 169/10335              | 1.6 (1.3-2.0)                       |  | 183/17732              | 1.1 (1.0-1.4)                       |  |
| <b>3<sup>rd</sup>/4<sup>th</sup> degree perineal tear</b> |                        |                                     |  |                        |                                     |  |
| 16-19                                                     | 25/1259                | 2.0 (1.2-3.2)                       |  | 30/1567                | 1.9 (1.2-2.8)                       |  |
| 20-24                                                     | 107/2609               | 4.1 (3.3-5.3)                       |  | 118/3709               | 3.2 (2.5-4.1)                       |  |
| 25-29                                                     | 153/3030               | 4.8 (3.9-5.8)                       |  | 274/5389               | 5.4 (4.7-6.3)                       |  |
| 30-34                                                     | 121/2343               | 5.1 (4.3-6.1)                       |  | 267/4942               | 5.8 (5.0-6.7)                       |  |
| 35-39                                                     | 49/968                 | 5.0 (3.4-7.2)                       |  | 85/2007                | 4.1 (3.2-5.2)                       |  |
| 40+                                                       | 9/149                  | 5.3 (2.9-9.6)                       |  | 17/196                 | 11.1 (5.0-22.7)                     |  |
| Total                                                     | 464/10358              | 4.4 (3.8-5.1)                       |  | 791/17810              | 4.6 (4.1-5.2)                       |  |
| <b>Maternal admission for higher level care</b>           |                        |                                     |  |                        |                                     |  |
| 16-19                                                     | 9/1266                 | 0.7 (0.3-1.6)                       |  | 5/1569                 | 0.3 (0.1-0.8)                       |  |
| 20-24                                                     | 18/2620                | 0.7 (0.4-1.2)                       |  | 22/3721                | 0.8 (0.4-1.5)                       |  |
| 25-29                                                     | 22/3043                | 0.7 (0.4-1.3)                       |  | 24/5395                | 0.7 (0.4-1.3)                       |  |
| 30-34                                                     | 16/2351                | 0.7 (0.4-1.3)                       |  | 31/4956                | 1.3 (0.5-3.1)                       |  |
| 35-39                                                     | 14/968                 | 1.9 (0.7-4.8)                       |  | 10/2021                | 0.5 (0.2-1.1)                       |  |
| 40+                                                       | 2/149                  | 1.5 (0.3-6.8)                       |  | 0/197                  | 0 -                                 |  |
| Total                                                     | 81/10397               | 0.8 (0.5-1.4)                       |  | 92/17859               | 0.8 (0.4-1.5)                       |  |

<sup>1</sup>Probability weights are incorporated to account for differences in the probability of a woman being selected for inclusion in the study arising from differences in each unit/trust's period of participation and the stratum specific probabilities of selection of OUs.

**Table S6 Less common intrapartum interventions and adverse maternal outcomes by maternal age in low risk multiparous women aged 16 and over**

| Age (years)                                               | OU                     |                                     | Non-OU                 |                                     |
|-----------------------------------------------------------|------------------------|-------------------------------------|------------------------|-------------------------------------|
|                                                           | Events / Births<br>n/N | Weighted <sup>1</sup><br>% (95% CI) | Events / Births<br>n/N | Weighted <sup>1</sup><br>% (95% CI) |
| <b>General anaesthesia</b>                                |                        |                                     |                        |                                     |
| 16-19                                                     | 1/177                  | 0.7 (0.1-4.3)                       | 1/339                  | 0.5 (0.1-3.6)                       |
| 20-24                                                     | 15/1516                | 1.0 (0.6-1.7)                       | 15/3518                | 0.4 (0.2-0.8)                       |
| 25-29                                                     | 19/2528                | 0.8 (0.5-1.2)                       | 18/7072                | 0.3 (0.1-0.5)                       |
| 30-34                                                     | 21/2569                | 0.8 (0.5-1.3)                       | 17/8526                | 0.2 (0.1-0.4)                       |
| 35-39                                                     | 19/1584                | 1.1 (0.7-1.7)                       | 16/5790                | 0.3 (0.1-0.5)                       |
| 40+                                                       | 9/343                  | 2.6 (1.5-4.6)                       | 5/985                  | 0.5 (0.2-1.6)                       |
| Total                                                     | 84/8717                | 0.9 (0.7-1.2)                       | 72/26230               | 0.3 (0.2-0.4)                       |
| <b>Maternal blood transfusion</b>                         |                        |                                     |                        |                                     |
| 16-19                                                     | 3/179                  | 1.7 (0.4-6.4)                       | 1/339                  | 0.5 (0.1-3.6)                       |
| 20-24                                                     | 6/1519                 | 0.4 (0.2-0.9)                       | 15/3495                | 0.5 (0.2-0.9)                       |
| 25-29                                                     | 16/2544                | 0.6 (0.3-1.0)                       | 26/7024                | 0.4 (0.3-0.6)                       |
| 30-34                                                     | 23/2575                | 0.9 (0.5-1.6)                       | 35/8478                | 0.4 (0.3-0.5)                       |
| 35-39                                                     | 11/1593                | 0.6 (0.3-1.1)                       | 30/5759                | 0.6 (0.4-1.0)                       |
| 40+                                                       | 7/345                  | 2.2 (1.1-4.3)                       | 6/979                  | 0.8 (0.3-1.8)                       |
| Total                                                     | 66/8755                | 0.7 (0.6-1.0)                       | 113/26074              | 0.5 (0.4-0.6)                       |
| <b>3<sup>rd</sup>/4<sup>th</sup> degree perineal tear</b> |                        |                                     |                        |                                     |
| 16-19                                                     | 5/179                  | 2.7 (1.2-5.9)                       | 4/340                  | 0.9 (0.3-2.4)                       |
| 20-24                                                     | 15/1529                | 1.1 (0.6-1.8)                       | 29/3518                | 1.0 (0.7-1.4)                       |
| 25-29                                                     | 44/2550                | 1.8 (1.3-2.3)                       | 60/7075                | 1.0 (0.7-1.3)                       |
| 30-34                                                     | 42/2588                | 1.6 (1.1-2.3)                       | 123/8531               | 1.6 (1.3-2.1)                       |
| 35-39                                                     | 32/1600                | 2.0 (1.3-3.1)                       | 71/5792                | 1.3 (1.0-1.7)                       |
| 40+                                                       | 5/345                  | 1.4 (0.6-3.3)                       | 12/985                 | 1.2 (0.6-2.2)                       |
| Total                                                     | 143/8791               | 1.7 (1.3-2.1)                       | 299/26241              | 1.3 (1.1-1.5)                       |
| <b>Maternal admission for higher level care</b>           |                        |                                     |                        |                                     |
| 16-19                                                     | 1/179                  | 0.5 (0.1-3.6)                       | 1/340                  | 0.5 (0.1-3.6)                       |
| 20-24                                                     | 1/1530                 | 0.1 (0.0-0.5)                       | 8/3524                 | 0.2 (0.1-0.5)                       |
| 25-29                                                     | 9/2558                 | 0.3 (0.2-0.7)                       | 17/7095                | 0.3 (0.2-0.5)                       |
| 30-34                                                     | 13/2595                | 0.5 (0.2-1.1)                       | 22/8551                | 0.3 (0.2-0.5)                       |
| 35-39                                                     | 4/1603                 | 0.3 (0.1-0.7)                       | 16/5805                | 0.3 (0.2-0.5)                       |
| 40+                                                       | 4/348                  | 1.2 (0.5-3.1)                       | 7/987                  | 0.7 (0.3-1.6)                       |
| Total                                                     | 32/8813                | 0.4 (0.2-0.6)                       | 71/26302               | 0.3 (0.2-0.4)                       |

<sup>1</sup> Probability weights are incorporated to account for differences in the probability of a woman being selected for inclusion in the study arising from differences in each unit/trust's period of participation and the stratum specific probabilities of selection of OUs.

**Table S7 Association between maternal age and intrapartum interventions and adverse maternal outcomes in low risk women aged between 16 and 40 years old (inclusive) additionally adjusted for complicating conditions**

|                                                       | Nulliparous women         |               | Multiparous women         |              |
|-------------------------------------------------------|---------------------------|---------------|---------------------------|--------------|
|                                                       | Adjusted <sup>1</sup>     |               | Adjusted <sup>1</sup>     |              |
|                                                       | RR                        | (95% CI)      | RR                        | (95% CI)     |
| Maternal composite                                    | 1.12                      | (1.09-1.15)   | 1.07                      | (1.02-1.12)  |
| OU <sup>2</sup>                                       | 1.11                      | (1.08-1.14)   |                           |              |
| Non-OU <sup>2</sup>                                   | 1.21                      | (1.18-1.24)   |                           |              |
|                                                       | Wald test for interaction | $P^3 < 0.001$ | Wald test for interaction | $P^3 = 0.50$ |
| Augmentation                                          | 1.11                      | (1.06-1.15)   | 0.98                      | (0.90-1.07)  |
| OU <sup>2</sup>                                       | 1.10                      | (1.05-1.15)   |                           |              |
| Non-OU <sup>2</sup>                                   | 1.22                      | (1.17-1.28)   |                           |              |
|                                                       | Wald test for interaction | $P^3 < 0.001$ | Wald test for interaction | $P^3 = 0.33$ |
| Instrumental delivery                                 | 1.18                      | (1.11-1.25)   | 1.14                      | (1.04-1.25)  |
|                                                       | Wald test for interaction | $P^3 = 0.17$  | Wald test for interaction | $P^3 = 0.08$ |
| Intrapartum caesarean section                         | 1.25                      | (1.20-1.30)   | 1.13                      | (1.03-1.23)  |
|                                                       | Wald test for interaction | $P^3 = 0.12$  | Wald test for interaction | $P^3 = 0.40$ |
| General anaesthesia                                   | 1.04                      | (0.91-1.19)   | 1.07                      | (0.89-1.29)  |
|                                                       | Wald test for interaction | $P^3 = 0.71$  | Wald test for interaction | $P^3 = 0.17$ |
| Maternal blood transfusion                            | 1.13                      | (0.95-1.33)   | 1.21                      | (0.93-1.59)  |
|                                                       | Wald test for interaction | $P^3 = 0.38$  | Wald test for interaction | $P^3 = 0.50$ |
| 3 <sup>rd</sup> /4 <sup>th</sup> degree perineal tear | 1.12                      | (1.02-1.23)   | 1.01                      | (0.89-1.15)  |
|                                                       | Wald test for interaction | $P^3 = 0.41$  | Wald test for interaction | $P^3 = 0.30$ |
| Maternal admission for higher level care              | 1.45                      | (1.07-1.96)   | 1.47                      | (1.04-2.08)  |
|                                                       | Wald test for interaction | $P^3 = 0.43$  | Wald test for interaction | $P^3 = 0.16$ |
| Neonatal composite                                    | 1.04                      | (0.94-1.16)   | 0.97                      | (0.83-1.13)  |
|                                                       | Wald test for interaction | $P^3 = 0.78$  | Wald test for interaction | $P^3 = 0.66$ |

<sup>1</sup> Probability weights are incorporated to account for differences in the probability of a woman being selected for inclusion in the study arising from differences in each unit/trust's period of participation and the stratum specific probabilities of selection of OUs. Models were adjusted for ethnic group, understanding of English, marital/partner status, BMI in pregnancy, index of multiple deprivation score quintile, gestation at delivery, planned place of birth (OU/AMU/FMU/home), and complicating conditions identified at the start of care in labour.

<sup>2</sup> Results in these rows were weighted and adjusted as in footnote 1, with the exception of planned place of birth.

<sup>3</sup>  $P$  for interaction, results in these rows were weighted and adjusted as in footnote 1 except that planned place of birth was included as a binary variable (OU vs. non-OU).

**Table S8 Event rates in restricted sample of nulliparous women aged 16 and over without complicating conditions identified at the start of care in labour**

| Age (years)                          | OU                     |                                     | Non-OU                 |                                     |
|--------------------------------------|------------------------|-------------------------------------|------------------------|-------------------------------------|
|                                      | Events / Births<br>n/N | Weighted <sup>1</sup><br>% (95% CI) | Events / Births<br>n/N | Weighted <sup>1</sup><br>% (95% CI) |
| <b>Maternal composite</b>            |                        |                                     |                        |                                     |
| 16-19                                | 335/985                | 34.4 (30.9-38.1)                    | 221/1418               | 16.9 (14.6-19.4)                    |
| 20-24                                | 861/2039               | 42.3 (38.9-45.9)                    | 768/3382               | 22.7 (20.6-25.0)                    |
| 25-29                                | 1160/2302              | 50.1 (47.4-52.7)                    | 1453/4929              | 30.2 (27.5-33.0)                    |
| 30-34                                | 902/1680               | 54.5 (49.8-59.1)                    | 1524/4442              | 35.4 (33.2-37.6)                    |
| 35-39                                | 391/680                | 57.7 (53.4-62.0)                    | 685/1800               | 38.0 (34.3-41.9)                    |
| 40+                                  | 67/98                  | 66.1 (53.7-76.6)                    | 70/173                 | 42.4 (32.9-52.5)                    |
| Total                                | 3716/7784              | 48.1 (45.5-50.8)                    | 4721/16144             | 29.7 (27.8-31.6)                    |
| <b>Augmentation</b>                  |                        |                                     |                        |                                     |
| 16-19                                | 224/991                | 23.0 (19.9-26.4)                    | 119/1428               | 8.0 (6.5-9.9)                       |
| 20-24                                | 527/2044               | 25.8 (22.0-30.0)                    | 417/3406               | 12.0 (10.5-13.8)                    |
| 25-29                                | 701/2305               | 30.0 (27.5-32.6)                    | 777/4944               | 15.8 (14.1-17.7)                    |
| 30-34                                | 523/1678               | 31.4 (27.5-35.6)                    | 838/4462               | 18.8 (17.2-20.5)                    |
| 35-39                                | 239/676                | 34.8 (28.3-42.0)                    | 402/1817               | 21.1 (18.2-24.3)                    |
| 40+                                  | 41/99                  | 40.2 (27.9-53.9)                    | 37/173                 | 22.6 (14.3-33.8)                    |
| Total                                | 2255/7793              | 29.0 (26.2-32.0)                    | 2590/16230             | 15.7 (14.5-16.9)                    |
| <b>Instrumental delivery</b>         |                        |                                     |                        |                                     |
| 16-19                                | 139/1008               | 13.6 (10.8-16.9)                    | 92/1432                | 8.2 (6.4-10.5)                      |
| 20-24                                | 354/2073               | 17.0 (14.9-19.4)                    | 350/3418               | 10.0 (8.5-11.8)                     |
| 25-29                                | 512/2328               | 22.2 (19.9-24.6)                    | 672/4962               | 14.0 (12.2-16.0)                    |
| 30-34                                | 411/1700               | 25.3 (20.0-31.4)                    | 713/4487               | 16.8 (15.0-18.9)                    |
| 35-39                                | 191/686                | 28.9 (24.2-34.1)                    | 353/1819               | 19.3 (15.8-23.4)                    |
| 40+                                  | 26/99                  | 26.9 (17.8-38.5)                    | 31/174                 | 20.7 (12.8-31.6)                    |
| Total                                | 1633/7894              | 21.2 (18.7-23.9)                    | 2211/16292             | 14.0 (12.6-15.5)                    |
| <b>Intrapartum caesarean section</b> |                        |                                     |                        |                                     |
| 16-19                                | 65/1008                | 6.8 (4.9-9.4)                       | 45/1432                | 2.7 (2.0-3.7)                       |
| 20-24                                | 194/2073               | 9.4 (7.8-11.3)                      | 156/3418               | 4.6 (3.6-5.8)                       |
| 25-29                                | 308/2328               | 13.0 (11.2-15.1)                    | 343/4962               | 7.3 (6.3-8.5)                       |
| 30-34                                | 267/1700               | 15.8 (13.2-18.9)                    | 382/4487               | 8.3 (7.2-9.6)                       |
| 35-39                                | 125/686                | 18.3 (13.9-23.9)                    | 177/1819               | 10.1 (8.1-12.5)                     |
| 40+                                  | 27/99                  | 25.6 (16.1-38.2)                    | 18/174                 | 8.8 (4.8-15.4)                      |
| Total                                | 986/7894               | 12.6 (11.0-14.5)                    | 1121/16292             | 6.9 (6.2-7.6)                       |
| <b>Perinatal composite</b>           |                        |                                     |                        |                                     |
| 16-19                                | 26/1003                | 2.6 (1.8-3.8)                       | 23/1419                | 2.5 (1.6-4.0)                       |
| 20-24                                | 58/2064                | 2.9 (1.9-4.3)                       | 87/3402                | 2.4 (1.9-3.1)                       |
| 25-29                                | 57/2319                | 2.7 (2.0-3.5)                       | 104/4932               | 2.0 (1.5-2.6)                       |
| 30-34                                | 67/1694                | 3.7 (2.6-5.2)                       | 108/4459               | 2.9 (2.1-4.0)                       |
| 35-39                                | 14/682                 | 1.8 (1.0-3.4)                       | 56/1804                | 2.5 (1.8-3.4)                       |
| 40+                                  | 7/99                   | 7.8 (3.8-15.6)                      | 4/172                  | 2.1 (0.5-8.5)                       |
| Total                                | 229/7861               | 2.9 (2.3-3.7)                       | 382/16188              | 2.4 (2.0-2.9)                       |

<sup>1</sup> Probability weights are incorporated to account for differences in the probability of a woman being selected for inclusion in the study arising from differences in each unit/trust's period of participation and the stratum specific probabilities of selection of OUs.

**Table S9 Event rates in restricted sample of multiparous women aged 16 and over without complicating conditions identified at the start of care in labour**

| Age (years)                          | OU                     |                                     |  | Non-OU                 |                                     |  |
|--------------------------------------|------------------------|-------------------------------------|--|------------------------|-------------------------------------|--|
|                                      | Events / Births<br>n/N | Weighted <sup>1</sup><br>% (95% CI) |  | Events / Births<br>n/N | Weighted <sup>1</sup><br>% (95% CI) |  |
| <b>Maternal composite</b>            |                        |                                     |  |                        |                                     |  |
| 16-19                                | 23/149                 | 14.2 (8.7-22.1)                     |  | 18/323                 | 6.2 (3.8-10.0)                      |  |
| 20-24                                | 183/1311               | 14.1 (11.9-16.8)                    |  | 130/3320               | 4.3 (3.4-5.5)                       |  |
| 25-29                                | 334/2159               | 15.5 (13.8-17.3)                    |  | 272/6663               | 4.7 (3.9-5.6)                       |  |
| 30-34                                | 342/2155               | 15.7 (13.3-18.5)                    |  | 376/8033               | 5.1 (4.4-5.9)                       |  |
| 35-39                                | 232/1316               | 17.8 (15.4-20.3)                    |  | 242/5421               | 5.3 (4.5-6.2)                       |  |
| 40+                                  | 54/265                 | 20.3 (16.4-24.8)                    |  | 55/917                 | 6.8 (5.1-9.1)                       |  |
| Total                                | 1168/7355              | 15.9 (14.2-17.8)                    |  | 1093/24677             | 5.0 (4.5-5.6)                       |  |
| <b>Augmentation</b>                  |                        |                                     |  |                        |                                     |  |
| 16-19                                | 11/150                 | 6.8 (3.5-12.8)                      |  | 9/324                  | 3.2 (1.7-6.0)                       |  |
| 20-24                                | 101/1321               | 7.6 (6.0-9.6)                       |  | 53/3352                | 1.8 (1.3-2.5)                       |  |
| 25-29                                | 155/2179               | 7.2 (5.7-9.0)                       |  | 94/6743                | 1.6 (1.2-2.1)                       |  |
| 30-34                                | 165/2175               | 7.5 (5.9-9.6)                       |  | 112/8118               | 1.5 (1.2-1.9)                       |  |
| 35-39                                | 93/1331                | 6.9 (5.5-8.7)                       |  | 80/5476                | 1.7 (1.2-2.3)                       |  |
| 40+                                  | 22/268                 | 8.3 (5.0-13.3)                      |  | 12/927                 | 1.2 (0.6-2.3)                       |  |
| Total                                | 547/7424               | 7.3 (6.1-8.8)                       |  | 360/24940              | 1.6 (1.4-1.9)                       |  |
| <b>Instrumental delivery</b>         |                        |                                     |  |                        |                                     |  |
| 16-19                                | 7/151                  | 4.2 (1.9-9.1)                       |  | 7/324                  | 3.3 (1.4-7.4)                       |  |
| 20-24                                | 45/1334                | 3.4 (2.4-4.8)                       |  | 33/3352                | 1.3 (0.9-1.9)                       |  |
| 25-29                                | 111/2205               | 5.1 (4.3-6.0)                       |  | 95/6757                | 1.7 (1.3-2.3)                       |  |
| 30-34                                | 126/2194               | 5.8 (4.7-7.1)                       |  | 119/8126               | 1.6 (1.2-2.0)                       |  |
| 35-39                                | 80/1338                | 6.1 (4.7-8.0)                       |  | 73/5482                | 1.7 (1.3-2.3)                       |  |
| 40+                                  | 20/269                 | 7.2 (4.5-11.3)                      |  | 15/929                 | 2.3 (1.1-4.9)                       |  |
| Total                                | 389/7491               | 5.3 (4.5-6.2)                       |  | 342/24970              | 1.7 (1.4-2.0)                       |  |
| <b>Intrapartum caesarean section</b> |                        |                                     |  |                        |                                     |  |
| 16-19                                | 4/151                  | 2.5 (0.9-7.2)                       |  | 4/324                  | 1.0 (0.3-2.7)                       |  |
| 20-24                                | 48/1334                | 3.6 (2.2-6.1)                       |  | 17/3352                | 0.5 (0.2-1.0)                       |  |
| 25-29                                | 79/2205                | 3.6 (2.7-4.7)                       |  | 42/6757                | 0.6 (0.4-0.9)                       |  |
| 30-34                                | 80/2194                | 3.6 (2.6-4.9)                       |  | 54/8126                | 0.7 (0.5-1.1)                       |  |
| 35-39                                | 64/1338                | 4.8 (3.4-6.7)                       |  | 41/5482                | 0.9 (0.6-1.4)                       |  |
| 40+                                  | 11/269                 | 4.0 (2.2-7.4)                       |  | 14/929                 | 1.4 (0.7-2.6)                       |  |
| Total                                | 286/7491               | 3.8 (2.9-5.0)                       |  | 172/24970              | 0.7 (0.6-0.9)                       |  |
| <b>Perinatal composite</b>           |                        |                                     |  |                        |                                     |  |
| 16-19                                | 4/151                  | 2.2 (0.8-5.7)                       |  | 4/322                  | 1.5 (0.5-4.5)                       |  |
| 20-24                                | 19/1325                | 1.5 (0.9-2.5)                       |  | 39/3323                | 1.2 (0.8-1.7)                       |  |
| 25-29                                | 34/2199                | 1.6 (1.1-2.2)                       |  | 61/6701                | 1.0 (0.7-1.6)                       |  |
| 30-34                                | 30/2182                | 1.4 (0.9-2.0)                       |  | 97/8058                | 1.1 (0.9-1.4)                       |  |
| 35-39                                | 26/1334                | 2.0 (1.2-3.4)                       |  | 82/5445                | 1.6 (1.2-2.1)                       |  |
| 40+                                  | 6/268                  | 2.2 (0.9-5.1)                       |  | 17/920                 | 2.1 (1.1-4.0)                       |  |
| Total                                | 119/7459               | 1.6 (1.2-2.1)                       |  | 300/24769              | 1.2 (1.0-1.5)                       |  |

<sup>1</sup> Probability weights are incorporated to account for differences in the probability of a woman being selected for inclusion in the study arising from differences in each unit/trust's period of participation and the stratum specific probabilities of selection of OUs.



STROBE Statement—Checklist of items that should be included in reports of *cohort studies*

|                           | Item No | Recommendation                                                                                                                                                                       |                                                                                            |
|---------------------------|---------|--------------------------------------------------------------------------------------------------------------------------------------------------------------------------------------|--------------------------------------------------------------------------------------------|
| <b>Title and abstract</b> | 1       | (a) Indicate the study's design with a commonly used term in the title or the abstract                                                                                               | Yes – title and abstract                                                                   |
|                           |         | (b) Provide in the abstract an informative and balanced summary of what was done and what was found                                                                                  | Yes, p2-3                                                                                  |
| <b>Introduction</b>       |         |                                                                                                                                                                                      |                                                                                            |
| Background/rationale      | 2       | Explain the scientific background and rationale for the investigation being reported                                                                                                 | Yes, p5                                                                                    |
| Objectives                | 3       | State specific objectives, including any prespecified hypotheses                                                                                                                     | Yes, p5-6                                                                                  |
| <b>Methods</b>            |         |                                                                                                                                                                                      |                                                                                            |
| Study design              | 4       | Present key elements of study design early in the paper                                                                                                                              | Yes, p7                                                                                    |
| Setting                   | 5       | Describe the setting, locations, and relevant dates, including periods of recruitment, exposure, follow-up, and data collection                                                      | Yes, p7-8. References also given to other                                                  |
| Participants              | 6       | (a) Give the eligibility criteria, and the sources and methods of selection of participants. Describe methods of follow-up                                                           | publications providing more details                                                        |
|                           |         | (b) For matched studies, give matching criteria and number of exposed and unexposed                                                                                                  | N/A                                                                                        |
| Variables                 | 7       | Clearly define all outcomes, exposures, predictors, potential confounders, and effect modifiers. Give diagnostic criteria, if applicable                                             | Yes, p8-9 and Table S1                                                                     |
| Data sources/measurement  | 8*      | For each variable of interest, give sources of data and details of methods of assessment (measurement). Describe comparability of assessment methods if there is more than one group | Yes, p7, more details in cited reports.                                                    |
| Bias                      | 9       | Describe any efforts to address potential sources of bias                                                                                                                            | Cohort study methods to minimise bias addressed elsewhere – ref 26.                        |
| Study size                | 10      | Explain how the study size was arrived at                                                                                                                                            | N/A. Secondary analysis of existing data. Original power calculations described in ref 26. |
| Quantitative variables    | 11      | Explain how quantitative variables were handled in the analyses. If applicable, describe which groupings were chosen and why                                                         | Yes, p8-9.                                                                                 |
| Statistical methods       | 12      | (a) Describe all statistical methods, including those used to control for confounding                                                                                                | Yes, p8-10                                                                                 |
|                           |         | (b) Describe any methods used to examine subgroups and interactions                                                                                                                  | Yes, interactions p9                                                                       |
|                           |         | (c) Explain how missing data were addressed                                                                                                                                          | N/A. Low level of missing data                                                             |
|                           |         | (d) If applicable, explain how loss to follow-up was addressed                                                                                                                       | N/A                                                                                        |
|                           |         | (e) Describe any sensitivity analyses                                                                                                                                                | Yes, p9                                                                                    |
| <b>Results</b>            |         |                                                                                                                                                                                      |                                                                                            |
| Participants              | 13*     | (a) Report numbers of individuals at each stage of study—eg numbers potentially eligible, examined for eligibility,                                                                  | P11 for current study; refs given for                                                      |

|                          |     |                                                                                                                                                                                                              |                                                                                                                |
|--------------------------|-----|--------------------------------------------------------------------------------------------------------------------------------------------------------------------------------------------------------------|----------------------------------------------------------------------------------------------------------------|
|                          |     | confirmed eligible, included in the study, completing follow-up, and analysed                                                                                                                                | 'recruitment' into main study                                                                                  |
|                          |     | (b) Give reasons for non-participation at each stage                                                                                                                                                         | Ditto                                                                                                          |
|                          |     | (c) Consider use of a flow diagram                                                                                                                                                                           | N/A                                                                                                            |
| Descriptive data         | 14* | (a) Give characteristics of study participants (eg demographic, clinical, social) and information on exposures and potential confounders                                                                     | Yes, Tables 1, S2 and S3                                                                                       |
|                          |     | (b) Indicate number of participants with missing data for each variable of interest                                                                                                                          | Yes, Tables 1, S2 and S3                                                                                       |
|                          |     | (c) Summarise follow-up time (eg, average and total amount)                                                                                                                                                  | N/A                                                                                                            |
| Outcome data             | 15* | Report numbers of outcome events or summary measures over time                                                                                                                                               | Yes, fully reported in tables                                                                                  |
| Main results             | 16  | (a) Give unadjusted estimates and, if applicable, confounder-adjusted estimates and their precision (eg, 95% confidence interval). Make clear which confounders were adjusted for and why they were included | Yes, unadjusted & adjusted estimates and 95% CIs reported in tables; adjustment variables described (Table S1) |
|                          |     | (b) Report category boundaries when continuous variables were categorized                                                                                                                                    | Yes. Maternal age – Table 1; confounders Table S1                                                              |
|                          |     | (c) If relevant, consider translating estimates of relative risk into absolute risk for a meaningful time period                                                                                             | Absolute event rates reported in tables                                                                        |
| Other analyses           | 17  | Report other analyses done—eg analyses of subgroups and interactions, and sensitivity analyses                                                                                                               | All analyses reported in manuscript or supplementary tables                                                    |
| <b>Discussion</b>        |     |                                                                                                                                                                                                              |                                                                                                                |
| Key results              | 18  | Summarise key results with reference to study objectives                                                                                                                                                     | Yes, p14                                                                                                       |
| Limitations              | 19  | Discuss limitations of the study, taking into account sources of potential bias or imprecision. Discuss both direction and magnitude of any potential bias                                                   | Yes, p14-15                                                                                                    |
| Interpretation           | 20  | Give a cautious overall interpretation of results considering objectives, limitations, multiplicity of analyses, results from similar studies, and other relevant evidence                                   | Other evidence comprehensively summarised p15-17; cautious interpretation p17                                  |
| Generalisability         | 21  | Discuss the generalisability (external validity) of the study results                                                                                                                                        | Yes, p14                                                                                                       |
| <b>Other information</b> |     |                                                                                                                                                                                                              |                                                                                                                |
| Funding                  | 22  | Give the source of funding and the role of the funders for the present study and, if applicable, for the original study on which the present article is based                                                | Yes, p18                                                                                                       |

\*Give information separately for exposed and unexposed groups.



**The effect of maternal age and planned place of birth on intrapartum outcomes in healthy women with straightforward pregnancies: secondary analysis of the Birthplace national prospective cohort study**

|                                 |                                                                                                                                                                                                                                                                                                                                                                                                                                                                                                                                                                                                                                                                                                                                                                                                                                                                                                                                                               |
|---------------------------------|---------------------------------------------------------------------------------------------------------------------------------------------------------------------------------------------------------------------------------------------------------------------------------------------------------------------------------------------------------------------------------------------------------------------------------------------------------------------------------------------------------------------------------------------------------------------------------------------------------------------------------------------------------------------------------------------------------------------------------------------------------------------------------------------------------------------------------------------------------------------------------------------------------------------------------------------------------------|
| Journal:                        | <i>BMJ Open</i>                                                                                                                                                                                                                                                                                                                                                                                                                                                                                                                                                                                                                                                                                                                                                                                                                                                                                                                                               |
| Manuscript ID:                  | bmjopen-2013-004026.R1                                                                                                                                                                                                                                                                                                                                                                                                                                                                                                                                                                                                                                                                                                                                                                                                                                                                                                                                        |
| Article Type:                   | Research                                                                                                                                                                                                                                                                                                                                                                                                                                                                                                                                                                                                                                                                                                                                                                                                                                                                                                                                                      |
| Date Submitted by the Author:   | 27-Nov-2013                                                                                                                                                                                                                                                                                                                                                                                                                                                                                                                                                                                                                                                                                                                                                                                                                                                                                                                                                   |
| Complete List of Authors:       | Li, Yangmei; University of Oxford, Policy Research Unit in Maternal Health and Care, National Perinatal Epidemiology Unit, Nuffield Department of Population Health<br>Townend, John; University of Oxford, Policy Research Unit in Maternal Health and Care, National Perinatal Epidemiology Unit, Nuffield Department of Population Health<br>Rowe, Rachel; University of Oxford, Policy Research Unit in Maternal Health and Care, National Perinatal Epidemiology Unit, Nuffield Department of Population Health<br>Knight, Marian; University of Oxford, Policy Research Unit in Maternal Health and Care, National Perinatal Epidemiology Unit, Nuffield Department of Population Health<br>Brocklehurst, Peter; University College London, Institute for Women's Health<br>Hollowell, Jennifer; University of Oxford, Policy Research Unit in Maternal Health and Care, National Perinatal Epidemiology Unit, Nuffield Department of Population Health |
| <b>Primary Subject Heading</b>: | Obstetrics and gynaecology                                                                                                                                                                                                                                                                                                                                                                                                                                                                                                                                                                                                                                                                                                                                                                                                                                                                                                                                    |
| Secondary Subject Heading:      | Epidemiology, Medical management, Evidence based practice, Health services research                                                                                                                                                                                                                                                                                                                                                                                                                                                                                                                                                                                                                                                                                                                                                                                                                                                                           |
| Keywords:                       | OBSTETRICS, Midwifery led care, Maternal medicine < OBSTETRICS, Intrapartum care                                                                                                                                                                                                                                                                                                                                                                                                                                                                                                                                                                                                                                                                                                                                                                                                                                                                              |
|                                 |                                                                                                                                                                                                                                                                                                                                                                                                                                                                                                                                                                                                                                                                                                                                                                                                                                                                                                                                                               |

SCHOLARONE™  
Manuscripts

1  
2  
3 **The effect of maternal age and planned place of birth on intrapartum**  
4 **outcomes in healthy women with straightforward pregnancies:**  
5 **secondary analysis of the Birthplace national prospective cohort**  
6 **study**  
7  
8  
9

10  
11  
12  
13  
14 **Authors**

15  
16  
17 Yangmei Li,<sup>1</sup> John Townend,<sup>1</sup> Rachel Rowe,<sup>1</sup> Marian Knight,<sup>1</sup> Peter Brocklehurst,<sup>2</sup> Jennifer Hollowell<sup>1</sup>

18  
19  
20 <sup>1</sup> Policy Research Unit in Maternal Health and Care, National Perinatal Epidemiology Unit, Nuffield  
21 Department of Population Health, University of Oxford, Oxford, UK  
22

23  
24 <sup>2</sup> Institute for Women's Health, University College London, London, UK  
25  
26  
27  
28

29 **Corresponding author**

30  
31  
32 Jennifer Hollowell PhD, Policy Research Unit in Maternal Health and Care, National Perinatal  
33 Epidemiology Unit, Nuffield Department of Population Health, University of Oxford, Old Road  
34 Campus, Headington, Oxford, OX3 7LF, United Kingdom  
35  
36

37  
38 Tel: +44 (0)1865 289452 (direct)/289700 (messages)

39  
40 Fax: +44 (0)1865 289701

41  
42  
43 Email: [jennifer.hollowell@npeu.ox.ac.uk](mailto:jennifer.hollowell@npeu.ox.ac.uk)  
44

45 **Keywords**

46  
47  
48 Maternal age, parity, birthing centre, home birth, augmentation, instrumental delivery, caesarean  
49 section, adverse maternal outcomes, adverse perinatal outcomes  
50  
51

52 **Word count**

53  
54  
55 Main text 4,630 words  
56  
57  
58  
59  
60

## Abstract

### Objectives

To describe the relationship between maternal age and intrapartum outcomes in 'low risk' women; and to evaluate whether the relationship between maternal age and intrapartum interventions and adverse outcomes differs by planned place of birth

### Design

Prospective cohort study

### Setting

Obstetric units, midwifery units and planned home births in England

### Participants

63,371 women aged over 16 without known medical or obstetric risk factors, with singleton pregnancies, planning vaginal birth

### Methods

Log Poisson regression was used to evaluate the association between maternal age, modelled as a continuous and categorical variable, and risk of intrapartum interventions and adverse maternal and perinatal outcomes.

### Main Outcome Measures

Intrapartum caesarean section, instrumental delivery, syntocinon augmentation and a composite measure of maternal interventions/adverse outcomes requiring obstetric care encompassing augmentation, instrumental delivery, intrapartum caesarean section, general anaesthesia, blood transfusion, 3<sup>rd</sup>/4<sup>th</sup> degree tear, maternal admission; adverse perinatal outcome (encompassing neonatal unit admission or perinatal death).

### Results

Interventions and adverse maternal outcomes requiring obstetric care generally increased with age, particularly in nulliparous women. For nulliparous women aged 16-40, the risk of experiencing an intervention or adverse outcome requiring obstetric care increased more steeply with age in planned non-obstetric unit births than in planned obstetric unit births (adjusted RR 1.21 per 5-year

1 increase in age, 95% CI 1.18-1.25 vs. adjusted RR 1.12, 95% CI 1.10-1.15) but absolute risks were  
2 lower in planned non-OU births at all ages. The risk of neonatal unit admission or perinatal death  
3 was significantly raised in nulliparous women aged 40+ relative to women aged 25-29 (adjusted RR  
4 2.29, 95% CI 1.28-4.09).  
5  
6  
7

### 8 **Conclusions**

9  
10 At all ages 'low risk' women who plan birth in a non-obstetric unit setting tend to experience lower  
11 intervention rates than comparable women who plan birth in an OU. Younger nulliparous women  
12 appear to benefit more from this reduction than older nulliparous women.  
13  
14  
15  
16  
17  
18  
19  
20  
21  
22  
23  
24  
25  
26  
27  
28  
29  
30  
31  
32  
33  
34  
35  
36  
37  
38  
39  
40  
41  
42  
43  
44  
45  
46  
47  
48  
49  
50  
51  
52  
53  
54  
55  
56  
57  
58  
59  
60

## Article summary

### Article focus

- Does increasing age in women without known medical or obstetric risk factors increase the risk of intrapartum interventions and adverse outcomes that might affect their choice of planned place of birth?

### Key messages

- Older women having a first baby appear to benefit less than younger women from planned birth in a non-obstetric unit setting.
- The chances of experiencing an intervention or outcome that requires obstetric care increase with age, even in women who do not have known risk factors.
- Increased intervention rates at older ages may partly reflect women's expectations and preferences and possibly 'higher risk' labelling by clinicians.

### Strengths and weaknesses

#### Strengths

- The study was based on a large, nationally representative cohort of 'low risk' women, with high quality data collected prospectively.

#### Weaknesses

- The number of women over 40 was relatively small so the study had limited power to explore effects in women over 40, particularly in non-obstetric unit settings.
- Planned births in non-obstetric unit settings were combined; graphical plots indicated that this was reasonable but important differences between settings cannot be ruled out.

## Background

The proportion of births in women aged 35 and over has been steadily rising in recent years in the UK and elsewhere.[1, 2] Currently approximately 16% of births in England and Wales are to women aged 35-39 and 4% of births are to women aged 40 and over.[1]

Advanced maternal age is associated with an increased risk of pregnancy complications including gestational diabetes,[3] pregnancy induced hypertension and preeclampsia,[4, 5] twin or higher order pregnancies,[3] breech presentation,[6] placenta praevia,[3, 7-9] preterm birth,[5, 10] post-term birth,[11], severe maternal morbidity,[12] and adverse perinatal outcomes including antepartum stillbirth,[13] intrapartum-related perinatal death,[14] early neonatal death[15] and neonatal unit admission.[5] Older women also have an increased risk of interventions such as induction and caesarean section.[16-20] However, many age-related pregnancy complications are known risk factors for intrapartum complications or adverse perinatal outcomes and women with these risk factors would normally be advised to give birth in an obstetric unit (OU). Relatively little is known about the incidence of intrapartum interventions and adverse maternal and perinatal outcomes in older women who do not have known risk factors.[21]

The current clinical guideline in England[22] recommends that healthy women with straightforward pregnancies should be offered a choice of planned birth at home, in a midwife-led unit or in an obstetric unit, but also suggest individual assessment when planning place of birth for women over 40 at booking.[22] The evidence for 'low risk' women in general shows that planned birth in a non-OU setting is associated with a lower incidence of intrapartum interventions[22-28] and research has demonstrated that in 'low risk' women, after adjustment for maternal characteristics, planned birth in a midwifery unit and planned birth at home (multiparous women only) is not associated with an increased risk to the baby compared with planned birth in an OU.[25] However, rates of intrapartum transfer increase with age in nulliparous women[29] and, more generally, the risks that might affect the choice of planned place of birth (PPOB) by healthy older women are not well documented.

The aim of this study was to evaluate the association between maternal age and intrapartum interventions and adverse maternal and perinatal outcomes that may influence the choice of planned place of birth, in 'low risk' women with singleton, term pregnancies planning a vaginal birth.

The main objectives were to describe the relationship between maternal age and intrapartum interventions and adverse outcomes that indicate a need for obstetric or neonatal care in 'low risk' women; and to evaluate whether the relationship between maternal age and intrapartum interventions and adverse outcomes differs by planned place of birth.



## Methods

### Settings and participants

The study used data from the Birthplace in England national prospective cohort study which was designed to compare perinatal and maternal outcomes and interventions by planned place of birth at the start of care in labour.

The cohort study methods are described in full elsewhere.[25, 26] Briefly, the Birthplace cohort included a total of 79,774 births between April 2008 and April 2010, including 32,257 planned OU births from a stratified random sample of 36 OUs, 11,666 planned births in 53 freestanding midwifery units (FMUs), 17,582 planned births in 43 alongside midwifery units (AMUs) and 18,269 planned home births from 142 NHS trusts across England. Births were eligible for inclusion if the woman was planning a vaginal birth and received some labour care from an NHS midwife in her planned birth setting. Women who had an elective caesarean section or caesarean section before the onset of labour, presented in preterm labour (<37 weeks' gestation), had a multiple pregnancy, an unplanned home birth, or who were "unbooked" (received no antenatal care) were excluded. Stillbirths occurring before the start of care in labour were excluded. Women in the cohort were classified as 'low risk' if before the start of labour they were not known to have any of the medical or obstetric risk factors listed in national guidelines on intrapartum care[22] as "indicating increased risk suggesting planned birth in an obstetric unit". The study had a high response rate and low levels of missing data.[25, 26]

The study population for the analyses reported here was 'low risk' women in the Birthplace cohort aged 16 years or over at the time of birth, with a term (gestational age 37<sup>+0</sup> weeks to 42<sup>+0</sup> weeks inclusive) pregnancy and parity less than 6. In the NICE intrapartum care guideline individual assessment is recommended when planning place of birth for women with parity of 6 or more and many midwifery units restrict admission to women of parity 5 or less.[30] We additionally excluded women for whom age, parity or gestational age was not known.

Research ethics committee approval for the Birthplace study was obtained from the Berkshire Research Ethics Committee and did not require consent to be sought from participants as no personally identifiable data were collected.

### Data

As described elsewhere,[25] maternal characteristics, and medical or obstetric risk factors known prior to the onset of labour were extracted from the woman's medical records by the midwife

1 attending the birth. Complicating conditions identified by the midwife at the start of care in labour  
2 (for example prolonged rupture of membranes), intrapartum interventions and adverse maternal  
3 and perinatal outcomes were recorded by the attending midwife using a data collection form started  
4 during labour and completed on or after the fifth postnatal day.  
5  
6

7  
8 Planned place of birth (OU, AMU, FMU or home) was based on the intended place of birth at the  
9 start of care in labour. Women were included in the group in which they planned to give birth at the  
10 start of care in labour regardless of whether they were transferred during labour care or  
11 immediately after the birth.  
12  
13

## 14 **Outcomes**

15  
16 We focused on outcome measures that reflected interventions and adverse outcomes that indicated  
17 a need for obstetric and/or neonatal care, that is, outcomes that would require the woman and/or  
18 baby to be transferred to an obstetric or neonatal unit if labour care or birth took place elsewhere.  
19 For women, we considered the following outcomes both separately and as a combined maternal  
20 composite outcome ('interventions/adverse outcomes requiring obstetric care'): augmentation with  
21 syntocinon, instrumental delivery (ventouse or forceps), intrapartum caesarean section, general  
22 anaesthesia, maternal blood transfusion, 3<sup>rd</sup>/4<sup>th</sup> degree perineal tear, maternal admission for higher  
23 level care. The use of epidural/spinal analgesia was also considered as a secondary outcome. The  
24 main outcomes considered for women were the maternal composite outcome ('interventions and  
25 adverse outcomes requiring obstetric care'), augmentation, instrumental delivery, and intrapartum  
26 caesarean section.  
27  
28

29 For babies, we considered a single composite outcome measure largely reflecting admission to a  
30 neonatal unit. This 'perinatal composite outcome' encompassed one or more of the following  
31 events: admission to a neonatal unit within 48 hours of birth, stillbirth after the onset of labour or  
32 early neonatal death.  
33  
34

## 35 **Statistical analysis**

36  
37 Analyses were conducted separately by parity. We modelled age at the time of delivery both as a  
38 categorical and continuous variable, using log Poisson regression to estimate relative risks adjusted  
39 for the following potential confounders: ethnic group, understanding of English, marital or partner  
40 status, body mass index (BMI), index of multiple deprivation (IMD) score, gestational age at birth  
41 and, where appropriate, planned place of birth (see supplementary Table S1 for categorisation). We  
42 also carried out sensitivity analyses in which we additionally adjusted for the presence of  
43  
44  
45  
46  
47  
48  
49  
50  
51  
52  
53  
54  
55  
56  
57  
58  
59  
60

1 complicating conditions identified at the start of care in labour (none, one or more) and for the use  
2 of epidural/spinal analgesia.  
3

4 We fitted a series of models following a pre-specified, iterative strategy. In order to test our  
5 modelling assumptions regarding age and to determine whether it was appropriate to combine data  
6 for planned births in non-OU settings, we plotted outcomes by age and planned place of birth using  
7 polynomial smoothing.[31] Visual inspection of these plots (see Figure 1 and 2 for the main  
8 outcomes) indicated that it was reasonable to model age as a continuous variable within the age  
9 range 16-40 (inclusive) and further indicated that event rates were generally similar in the three  
10 non-OU settings, suggesting that it was reasonable to combine the non-OU settings for the purposes  
11 of exploring interactions between maternal age and planned place of birth. We did not model age as  
12 a continuous variable above the age of 40 because data were sparse, particularly for planned non-  
13 OU births to nulliparous women, and we could not be confident that the broadly linear trends seen  
14 at younger ages could be extrapolated above this age.  
15  
16

17 We initially modelled the effect of age on study outcomes separately by parity and for all planned  
18 places of birth combined. Models in which age was modelled as a continuous variable were  
19 restricted to the age range 16-40 inclusive. For each of the study outcomes, we tested for an  
20 interaction between age (as a continuous variable) and planned place of birth (OU vs. non-OU) using  
21 a Wald test, and where the interaction was significant at the 5% level, we modelled the effect of age  
22 on the outcome separately by planned place of birth. For outcomes where the interaction between  
23 age and planned place of birth was significant, we calculated crude and adjusted relative risks  
24 associated with planned non-OU birth separately for each age band.  
25  
26

27 In order to test whether the presence of complicating conditions at the start of care in labour (for  
28 example prolonged rupture of membranes) had an effect on the observed relationships, we fitted a  
29 further set of models in which we adjusted for both maternal characteristics and the presence of  
30 complicating conditions. Because previous analyses have shown that women planning birth in an OU  
31 have a higher prevalence of complicating conditions than in other settings[25] and this affects the  
32 magnitude of the difference in event rates between settings, we carried out further analyses of the  
33 main outcomes restricted to 'low risk' women without complicating conditions at the start of care in  
34 labour.  
35  
36

37 Robust variance estimation was used to allow for the clustered nature of the data and, as described  
38 elsewhere,[25, 26] probability weights were incorporated to account for differences in the  
39 probability of a woman being selected for inclusion in the study arising from differences in each  
40 unit/trust's period of participation and the stratum specific probabilities of selection of OUs. The  
41  
42  
43  
44  
45  
46  
47  
48  
49  
50

1  
2  
3  
4  
5  
6  
7  
8  
9  
10  
11  
12  
13  
14  
15  
16  
17  
18  
19  
20  
21  
22  
23  
24  
25  
26  
27  
28  
29  
30  
31  
32  
33  
34  
35  
36  
37  
38  
39  
40  
41  
42  
43  
44  
45  
46  
47  
48  
49  
50  
51  
52  
53  
54  
55  
56  
57  
58  
59  
60

weighting is such that, when applied to the pooled data for all four settings, the weighted event rates represent the estimated average event rates for England as a whole.

For each outcome, we calculated the number of events, the number of births, the weighted incidence and 95% confidence intervals. We assessed statistical significance at the 5% level.

For peer review only

## Results

### Description of the study sample

From the 79,774 women in the Birthplace cohort we excluded 15,553 women who had pre-existing risk factors including 'NICE' medical and obstetric risk factors,[22] grand multiparity (parity 6 or over) and post-term pregnancy, 62 women who were aged under 16, 682 women who had missing data on risk factors, parity or gestational age, and 106 whose age was missing. The study population consisted of 63,371 eligible 'low risk' women. The proportion (weighted) of women who were ineligible because of pre-existing risk factors, increased from 31.9% in women aged 16-19 to 46.7% in women aged 40 and over.

Table 1 describes the characteristics of the sample by age. The percentages shown in the table are weighted so that they provide an estimate of the distribution of maternal characteristics that would apply to eligible 'low risk' births in England. Older women tended to be white, have a fluent understanding of English, and were more likely than younger women to live in a socioeconomically advantaged area. They were less likely than younger women to be nulliparous and more likely to have had multiple previous pregnancies. Planned home births were more common at older ages (Table 1 and supplementary Tables S2 and S3), particularly in multiparous women (supplementary Table S3). Older women were more likely to have complicating conditions, such as prolonged rupture of membranes, noted by the midwife at the start of care in labour (Table 1). Complicating conditions at start of care in labour were more common in nulliparous women (supplementary Tables S2 and S3).

[TABLE 1 HERE]

### Maternal interventions and adverse outcomes

Descriptive plots of outcomes by age indicated that the incidence of most outcomes tended to increase steadily with age in the age range 16 to 40, and that incidence rates were generally lower in planned non-OU births (Figure 1 and supplementary Figure S1). Rates for planned OU and non-OU births tended to diverge above this age range, but rates were based on small numbers of older women (supplementary Table S4) particularly for planned AMU and FMU births and therefore these rates have wide confidence intervals.

For nulliparous women in the age range 16-40 (all PPOBs combined), the adjusted risk of having an intervention/ adverse outcome requiring obstetric care (maternal composite) increased significantly with age, as did the risk of augmentation with syntocinon, instrumental delivery, intrapartum

1 caesarean section, 3<sup>rd</sup>/4<sup>th</sup> degree perineal tear, or maternal admission for higher level care (Table 2).  
2 For augmentation with syntocinon and the maternal composite outcome, the effect of age differed  
3 by PPOB (Table 2). The risk of augmentation increased more steeply with age in non-OU settings (RR  
4 1.23, 95% CI 1.18-1.28 for every 5-year increase in age in planned non-OU births vs. 1.12, 95% CI  
5 1.07-1.17 for planned OU births). Nevertheless, the proportion of women receiving augmentation  
6 was lower in planned non-OU births at all ages (Table 3). For example, 42.2% (95% CI 36.4%-48.1%)  
7 of nulliparous women aged 35-39 who planned birth in an OU received augmentation with  
8 syntocinon compared with 22.6% (95% CI 19.8%-25.7%) of nulliparous women of the same age who  
9 planned birth in a non-OU setting. A similar pattern was observed for the maternal composite  
10 outcome: the risk of an intervention/adverse outcome requiring obstetric care (maternal composite)  
11 increased slightly more steeply with age in the non-OU settings (RR 1.21, 95% CI 1.18-1.25 for every  
12 5-year increase in age in planned non-OU births vs. 1.12, 95% CI 1.10-1.15 for planned OU births) but  
13 the absolute risk was lower in the planned non-OU birth at all ages (Table 3). For example, 65.5%  
14 (95% CI 61.8%-69.1%) of nulliparous women aged 35-39 who planned birth in an OU experienced an  
15 intervention/adverse outcome requiring obstetric care compared with 39.9% (95% CI 36.0%-43.9%)  
16 of nulliparous women of the same age who planned birth in a non-OU setting. In nulliparous women,  
17 the risk of instrumental delivery and intrapartum caesarean section increased significantly with age  
18 (RR 1.18, 95% CI 1.12-1.25 and RR 1.27, 95% CI 1.23-1.32) across all settings. Again, absolute risks  
19 were substantially lower in planned non-OU births (Table 3).  
20  
21  
22  
23  
24  
25  
26  
27  
28  
29  
30  
31

32 [TABLE 2 AND TABLE 3 HERE]  
33  
34

35 Similar patterns were observed when we adjusted for complicating conditions at the start of care in  
36 labour in order to take account of difference between settings in complicating conditions at the start  
37 of care in labour (23.9% in nulliparous planned OU births vs. 8.6% in nulliparous planned-non-OU  
38 births) (supplementary Table S5).  
39  
40  
41

42 However, although the risk of intervention increased with age, at all ages, nulliparous women who  
43 planned birth in a non-OU setting had a significantly reduced risk of receiving augmentation or of  
44 experiencing an intervention/adverse outcome requiring obstetric care. Table 4 shows the adjusted  
45 risks by age for the two outcomes (maternal composite and augmentation) where the effect of  
46 planned place of birth differed by age.  
47  
48  
49  
50

51 [TABLE 4 HERE]  
52  
53

54 For multiparous women aged 16-40 (all PPOBs combined), the combined risk of having an  
55 intervention or adverse outcome requiring obstetric care (maternal composite) or of instrumental  
56 delivery, intrapartum caesarean section, and maternal admission for higher level care increased with  
57  
58  
59  
60

1 age (Table 2). Augmentation with syntocinon, general anaesthesia, blood transfusion, and 3<sup>rd</sup>/4<sup>th</sup>  
2 degree perineal tear were not associated with maternal age in multiparous women (Table 2). For all  
3 of the outcomes considered, the effect of age did not differ by PPOB in multiparous women (Table  
4 2). Again, for the maternal composite outcome, augmentation with syntocinon, instrumental  
5 delivery, intrapartum caesarean section, the absolute event rates were lower in planned non-OU  
6 births in most age categories (Table 5). For example, 9.8% (95% CI 8.2%-11.6%) of multiparous  
7 women aged 35-39 who planned birth in an OU received augmentation with syntocinon compared  
8 with 1.8% (95% CI 1.3%-2.5%) of women of the same age who planned birth in a non-OU setting.  
9

10  
11  
12  
13  
14  
15 Up to age 40, other less common outcomes did not increase significantly with maternal age in  
16 nulliparous or multiparous women with the exception of maternal admission to higher level care  
17 (Table 2 and supplementary Tables S6 and S7).  
18

19  
20 [TABLE 5 HERE]  
21

22  
23 Absolute event rates for the main outcomes (maternal composite, augmentation with syntocinon,  
24 instrumental delivery, intrapartum caesarean section and perinatal composite) were reduced when  
25 the analysis was restricted to women without complicating conditions identified at start of labour  
26 care (supplementary Tables S8 and S9). However, at all ages, nulliparous women without  
27 complicating conditions who planned birth in a non-OU setting had a significantly reduced risk of  
28 experiencing an intervention/adverse outcome requiring obstetric care (maternal composite  
29 outcome) (Table S8 and S10). For example, 38.0% (95% CI 34.3%-41.9%) of nulliparous women aged  
30 35-39 without complicating complications who planned birth in a non-OU setting experienced an  
31 intervention/adverse outcome requiring obstetric care, compared with 57.7% (95% CI 53.4%- 62.0%)  
32 of women of the same age without complicating conditions who planned birth in an OU.  
33  
34  
35  
36  
37  
38

39  
40 The use of epidural/spinal analgesia increased significantly with maternal age and lower rates of use  
41 were observed in planned non-OU births (supplementary Figure S2). Adjustment for use of epidural  
42 in the multivariable models attenuated but did not change the results materially (data not shown).  
43  
44  
45

#### 46 **Perinatal outcome**

47  
48 The perinatal composite outcome (admission to a neonatal unit within 48 hours of birth, stillbirth  
49 after the onset of labour or early neonatal death) showed a modest but not statistically significant  
50 increase with age in nulliparous women in the age range 16-40 (Table 2). The risk increased  
51 significantly in nulliparous women aged 40+ compared with women aged 25-29 (RR 2.29, 95%CI  
52 1.28-4.09, adjusted for maternal characteristics and planned place of birth, all settings combined).  
53  
54  
55  
56  
57  
58  
59  
60

1  
2  
3  
4  
5  
6  
7  
8  
9  
10  
11  
12  
13  
14  
15  
16  
17  
18  
19  
20  
21  
22  
23  
24  
25  
26  
27  
28  
29  
30  
31  
32  
33  
34  
35  
36  
37  
38  
39  
40  
41  
42  
43  
44  
45  
46  
47  
48  
49  
50  
51  
52  
53  
54  
55  
56  
57  
58  
59  
60

multiparous women in the age range 16-40 (Table 2) and the risk was not significantly increased in births to multiparous women aged 40+ compared with women aged 25-29 (RR 1.21, 95% CI 0.60-2.43, adjustment as before). Absolute event rates are shown in Table 6.

[TABLE 6 HERE]

For peer review only



## Discussion

### Principal findings

In women without known medical or obstetric risk factors prior to the onset of labour, interventions and adverse maternal outcomes requiring obstetric care generally increased with age, but there was no age at which there was a step-change in risk. For both nulliparous and multiparous women, maternal intervention rates were lower in births planned in non-OU settings compared with planned OU births at all ages. For nulliparous women the overall risk of experiencing an intervention or adverse outcome requiring obstetric care, and in particular of augmentation with syntocinon, increased more steeply with age in planned non-OU births than in planned OU births. As a consequence, although nulliparous women of all ages who planned birth in a non-OU setting had a significantly reduced risk of experiencing an intervention or adverse outcome requiring obstetric care, the benefit of planned non-OU birth was greatest at younger ages.

In low risk women up to the age of 40, the risk of neonatal unit admission or intrapartum stillbirth/early neonatal death did not show a statistically significant upward trend with age in either nulliparous or multiparous women. In planned OU births, the risk of neonatal unit admission or perinatal death was significantly higher in nulliparous women aged 40+ relative to women aged 25-29.

### Strengths and limitations

A strength of the study is that we were able to evaluate the effect of age on intrapartum outcomes by planned birth setting in a nationally representative sample of 'low risk' women. In order to strengthen the evidence supporting clinical guidelines on planned place of birth, the study specifically focused on outcomes that reflect need for obstetric or neonatal care in a sample of women who meet the current criteria for planned birth in a non-OU setting.[22] To our knowledge, this is the first study to investigate the effect of increasing maternal age in different birth settings with a focus on outcomes that would require transfer to an OU and hence may affect the choice of planned place of birth.

Despite the large overall sample size, the number of older women was relatively small, so we had limited ability to explore effects above age 40 or to separate results of individual non-OU birth settings. We combined data for the non-OU settings, having first explored the data to check that this was reasonable. This increased our statistical power to evaluate the association between maternal age and the study outcomes (maternal and perinatal), but we still lacked the statistical power to evaluate uncommon outcomes. It is important to note that previous analyses[25] have shown that

1 planned home births are associated with a significantly increased risk of adverse perinatal outcomes  
2 in nulliparous women.  
3

4  
5 The risk of bias due to missing data and non-response was low: the study had a low level of missing  
6 data, a high response rate[25, 26] and, because consent was not required, there was no self-  
7 selection bias due to non-consent. We addressed potential differences in risk between groups in a  
8 number of ways. First, we controlled for important potential confounders such as body mass index.  
9  
10 Second, we focused on a relatively homogeneous population of women without known medical or  
11 obstetric risk factors prior to the onset of labour. Third, because previous analyses[25] identified  
12 that the prevalence of complicating conditions at the start of care in labour was higher in the  
13 planned OU birth group, we conducted two additional analyses in which we controlled for  
14 complicating conditions and restricted the analysis to women without complicating conditions.  
15  
16 Differences in the clinical characteristics of the OU and non-OU groups therefore seem unlikely to  
17 explain the age related trends observed or the significant reductions in risks observed in non-OU  
18 births. Nevertheless, women self-select their birth setting and it may be that some of the differences  
19 in outcomes that we observed between settings may have been due to unmeasured differences in  
20 the characteristics of women opting for OU and non-OU births, rather than to differences  
21 attributable to the birth setting.  
22  
23  
24  
25  
26  
27  
28  
29

### 30 **Comparison with the existing literature**

31  
32  
33 Older women have been shown to have an increased risk of intrapartum intervention,[6, 32] but  
34 many studies include women known to be at higher risk who would normally be advised to give birth  
35 in an obstetric unit. Evidence relating to 'low risk' women[17] or from studies that have controlled  
36 for pre-existing risk factors or complications[33] is more limited but is generally consistent with our  
37 finding that intervention rates increase with age in 'low risk' women.  
38  
39  
40

41  
42 There is extensive evidence that 'low risk' women who plan birth in a non-OU setting have a reduced  
43 risk of a range of intrapartum interventions, including augmentation, instrumental delivery and  
44 intrapartum caesarean section, and are more likely to have a spontaneous vaginal birth.[22-24, 27,  
45 28] Our study found that, across the age range 16-40, women who plan birth in a non-OU setting  
46 experience substantially lower intervention rates and are less likely to experience an outcome  
47 requiring obstetric care than women of the same age who plan birth in an obstetric unit.  
48  
49  
50

51  
52  
53 In nulliparous women we found that rates of augmentation of labour with syntocinon increased  
54 more steeply with maternal age in planned non-OU births compared with planned OU births,  
55 although absolute rates of augmentation were substantially lower in planned non-OU births at all  
56 ages. An age-related increase in augmentation is consistent with evidence of poorer uterine function  
57  
58  
59  
60

1 at older ages,[34] longer labours[34] and an increased incidence of prolonged labour,[35, 36] but the  
2 reasons for a steeper increase in augmentation with age in non-OU settings is unclear. It has been  
3 suggested that labelling of older women as 'higher risk' and/or heightened concern about the safety  
4 of older nulliparous women, particularly those who have required fertility treatment, may result in  
5 increased rates of caesarean section for non-medical reasons,[20, 32, 33, 37] and it is possible that  
6 similar factors affect midwives' decision making regarding transfer for failure to progress, or for  
7 other reasons. Intrapartum transfers from midwifery units in the Birthplace study have been shown  
8 to increase significantly with age in nulliparous women[29] and, once transferred, women are  
9 'exposed' to the higher intervention rates found in obstetric units.

16 It is also possible that age-related differences in women's expectations and expressed preferences  
17 may contribute to the pattern of intervention observed in our study. Older nulliparous women have  
18 been found to have a more positive attitude towards caesarean section,[38] for example, and also to  
19 have a higher perception of pregnancy risk, even in older women without known risk factors.[39]  
20 The significant positive association between maternal age and epidural use observed in our study  
21 (seen most strongly in nulliparous women planning a non-OU birth), would be consistent with a  
22 greater willingness of older women to consider interventions.

28 We found a significantly increased risk of maternal admission to higher level care at older ages in  
29 both nulliparous and multiparous women. The number of events was small and this could be a  
30 chance finding but an increase in serious obstetric complications at older ages observed in some  
31 studies[3, 6, 12] cannot be ruled out.

36 Although studies including women with known risk factors have reported increased risks in women  
37 aged over 35,[3, 6, 35] our analysis shows that up to the age of 40, risks tend to increase in a broadly  
38 linear manner in healthy women with straightforward pregnancies, with no evidence of a step-  
39 change in risk below the age of 40. Other studies have similarly concluded that the association of  
40 adverse outcomes with maternal age is a continuum,[3] with the increase in adverse perinatal  
41 outcomes possibly gaining momentum above the age of 40.[40] Because of the small number of  
42 births to mothers aged over 40 in our sample we had limited power to evaluate risks at older ages  
43 and other evidence relating to older 'low risk' women is sparse.[21]

50 There is some evidence that the babies of older women are at increased risk of serious adverse  
51 outcomes, including intrapartum-related perinatal death,[14] early neonatal death[15] and neonatal  
52 unit admission,[5, 33] but these outcomes would be expected to be substantially reduced in 'low  
53 risk' women who, by definition, do not have medical or obstetric risk factors such as severe obesity,  
54 diabetes or previous caesarean section. Furthermore, the poorer outcomes associated with the  
55

1 increased risk of pre-term birth at older ages do not apply to women giving birth at term. In our 'low  
2 risk' cohort, we did not observe a significant increase with age in our composite measure of neonatal  
3 unit admission/perinatal death within the age range 16-40, but graphical plots for nulliparous  
4 women suggested a possible upturn in neonatal unit admission/perinatal death around the age of 40  
5 in nulliparous women. Further research evaluating perinatal outcomes in 'low risk' women aged over  
6 40 is needed.  
7  
8  
9

### 10 **Conclusions and policy implications**

11  
12  
13  
14 The incidence of intrapartum interventions and adverse outcomes requiring obstetric care increases  
15 with maternal age, but at all ages 'low risk' women who plan birth in a non-obstetric unit setting  
16 tend to experience lower intervention rates than comparable women who plan birth in an OU.  
17 Amongst nulliparous women, younger women appear to benefit more from the reduction in  
18 interventions associated with planned birth in a non-OU setting. Increased intervention rates at  
19 older ages may partly reflect women's expectations and preferences and possibly 'higher risk'  
20 labelling by clinicians.  
21  
22  
23  
24  
25

26 All women, irrespective of age and parity, should be given information about the risks and benefits  
27 of different birth settings. Nulliparous women planning birth in non-OU setting should be informed  
28 that the risk of interventions that require transfer to an OU increases with age. Further research is  
29 required to evaluate adverse perinatal outcomes in 'low risk' women aged over 40.  
30  
31  
32  
33  
34  
35  
36  
37  
38  
39  
40  
41  
42  
43  
44  
45  
46  
47  
48  
49  
50  
51  
52  
53  
54  
55  
56  
57  
58  
59  
60

## Acknowledgements

We thank Xiaosi Wang for conducting initial literature searches and statistical analysis.

## Competing interests

None.

## Contribution to authorship

JH conceived and developed the study outline with input from PB; YL developed the protocol and analysis plan with input from JH, JT and MK; YL conducted the analysis; JT provided statistical advice; YL and JH drafted the manuscript with input from RR, MK and PB. All authors were involved in interpretation of data, review and revision of the draft manuscript and approval of the final version.

## Ethics Approval

Research ethics committee approval for the Birthplace study was obtained from the Berkshire Research Ethics Committee (MREC ref 07/H0505/151).

## Funding

This paper reports on an independent study which is funded by the Policy Research Programme in the Department of Health. The views expressed are not necessarily those of the Department.

Birthplace combines the Evaluation of Maternity Units in England study funded in 2006 by the National Institute for Health Research Service Delivery and Organisation (NIHR SDO) programme, and the Birth at Home in England study funded in 2007 by the Department of Health Policy Research Programme (DH PRP). From January 2012, the NIHR SDO programme merged with the NIHR Health Services Research programme to establish the new NIHR health Services and Delivery Research (NIHR HS&DR) programme. The views and opinions expressed by the authors do not necessarily reflect those of the HS&DR Programme, NIHR, NHS, DH PRP or the Department of Health.

## References

1. Office for National Statistics. Live Births in England and Wales by Characteristics of Mother 1, 2011. November 2013. Available from: [http://www.ons.gov.uk/ons/dcp171778\\_296157.pdf](http://www.ons.gov.uk/ons/dcp171778_296157.pdf).
2. Martin JA, Hamilton BE, Ventura SJ, et al. Births: final data for 2009. *Natl Vital Stat Rep*. 2011;**60**(1):1-70. doi:
3. Biro MA, Davey M-A, Carolan M, et al. Advanced maternal age and obstetric morbidity for women giving birth in Victoria, Australia: A population-based study. *Aust N Z J Obstet Gynaecol*. 2012;**52**(3):229-34. doi: 10.1111/j.1479-828X.2012.01427.x
4. Carolan M. Maternal age  $\geq 45$  years and maternal and perinatal outcomes: A review of the evidence. *Midwifery*. 2013;**29**(5):479-89. doi: 10.1016/j.midw.2012.04.001
5. Delbaere I, Verstraelen H, Goetgeluk S, et al. Pregnancy outcome in primiparae of advanced maternal age. *European Journal of Obstetrics & Gynecology and Reproductive Biology*. 2007;**135**(1):41-6. doi: 10.1016/j.ejogrb.2006.10.030
6. Jolly M, Sebire N, Harris J, et al. The risks associated with pregnancy in women aged 35 years or older. *Hum Reprod*. 2000;**15**(11):2433-7. doi: 10.1093/humrep/15.11.2433
7. Ananth CV, Demissie K, Smulian JC, et al. Placenta previa in singleton and twin births in the United States, 1989 through 1998: A comparison of risk factor profiles and associated conditions. *Am J Obstet Gynecol*. 2003;**188**(1):275-81. doi: 10.1067/mob.2003.10
8. Ananth CV, Wilcox AJ, Savitz DA, et al. Effect of maternal age and parity on the risk of uteroplacental bleeding disorders in pregnancy. *Obstet Gynecol*. 1996;**88**(4, Part 1):511-6. doi: 10.1016/0029-7844(96)00236-0
9. Faiz AS, Ananth CV. Etiology and risk factors for placenta previa: an overview and meta-analysis of observational studies. *Journal of Maternal-Fetal and Neonatal Medicine*. 2003;**13**(3):175-90. doi: 10.1080/jmf.13.3.175.190
10. Jacobsson B, Ladfors L, Milsom I. Advanced Maternal Age and Adverse Perinatal Outcome. *Obstet Gynecol*. 2004;**104**(4):727-33. doi: 10.1097/01.AOG.0000140682.63746.be. doi: 10.1097/01.AOG.0000140682.63746.be

- 1 11. Roos N, Sahlin L, Ekman-Ordeberg G, et al. Maternal risk factors for postterm pregnancy and  
2 cesarean delivery following labor induction. *Acta Obstet Gynecol Scand*. 2010;**89**(8):1003-10. doi:  
3 10.3109/00016349.2010.500009
- 4  
5  
6 12. Knight M, Kurinczuk JJ, Spark P, et al. Inequalities in maternal health: national cohort study  
7 of ethnic variation in severe maternal morbidities. *BMJ*. 2009;**338**:b542. doi: 10.1136/bmj.b542
- 8  
9  
10 13. Huang L, Sauve R, Birkett N, et al. Maternal age and risk of stillbirth: a systematic review.  
11 *Can Med Assoc J*. 2008;**178**(2):165-72. doi: 10.1503/cmaj.070150
- 12  
13  
14 14. Pasupathy D, Wood AM, Pell JP, et al. Advanced maternal age and the risk of perinatal death  
15 due to intrapartum anoxia at term. *J Epidemiol Community Health*. 2011;**65**(3):241-5. doi:  
16 10.1136/jech.2009.097170
- 17  
18  
19 15. Gilbert WM, Nesbitt TS, Danielsen B. Childbearing Beyond Age 40: Pregnancy Outcome in  
20 24,032 Cases. *Obstet Gynecol*. 1999;**93**(1):9-14. doi:  
21  
22  
23 16. Ezra Y, McParland P, Farine D. High delivery intervention rates in nulliparous women over  
24 age 35. *European Journal of Obstetrics & Gynecology and Reproductive Biology*. 1995;**62**(2):203-7.  
25 doi: [http://dx.doi.org/10.1016/0301-2115\(95\)02201-H](http://dx.doi.org/10.1016/0301-2115(95)02201-H)
- 26  
27  
28 17. Gordon D, Milberg J, Daling J, et al. Advanced Maternal Age As a Risk Factor for Cesarean  
29 Delivery. *Obstet Gynecol*. 1991;**77**(4):493-7. doi:  
30  
31  
32 18. Heffner LJ, Elkin E, Fretts RC. Impact of labor induction, gestational age, and maternal age on  
33 cesarean delivery rates. *Obstet Gynecol*. 2003;**102**(2):287-93. doi: 10.1016/S0029-7844(03)00531-3
- 34  
35  
36 19. Patel RR, Peters TJ, Murphy DJ, et al. Prenatal risk factors for Caesarean section. Analyses of  
37 the ALSPAC cohort of 12 944 women in England. *Int J Epidemiol*. 2005;**34**(2):353-67. doi:  
38 10.1093/ije/dyh401
- 39  
40  
41 20. Peipert JF, Bracken MB. Maternal Age: An Independent Risk Factor for Cesarean Delivery.  
42 *Obstet Gynecol*. 1993;**81**(2):200-5. doi:  
43  
44  
45 21. Carolan M. The Graying of the Obstetric Population: Implications for the Older Mother. *J*  
46 *Obstet Gynecol Neonatal Nurs*. 2003;**32**(1):19-27. doi: 10.1177/0884217502239797
- 47  
48  
49 22. National Collaborating Centre for Women's and Children's Health. Intrapartum care of  
50 healthy women and their babies during childbirth. Commissioned by the National Institute for Health  
51 and Clinical Excellence (NICE). London: RCOG press; 2007.
- 52  
53  
54  
55  
56  
57  
58  
59  
60

- 1 23. Hodnett ED, Downe S, Walsh D. Alternative versus conventional institutional settings for  
2 birth. *The Cochrane database of systematic reviews*. 2012;**8**:CD000012. doi:  
3 10.1002/14651858.CD000012.pub4  
4  
5  
6 24. Walsh D, Downe SM. Outcomes of free-standing, midwife-led birth centers: a structured  
7 review. *Birth*. 2004;**31**(3):222-9. doi: 10.1111/j.0730-7659.2004.00309.x  
8  
9  
10 25. Birthplace in England Collaborative Group. Perinatal and maternal outcomes by planned  
11 place of birth for healthy women with low risk pregnancies: the Birthplace in England national  
12 prospective cohort study. *BMJ*. 2011;**343**:d7400. doi: 10.1136/bmj.d7400  
13  
14  
15 26. Hollowell J, Puddicombe D, Rowe R, et al. The Birthplace national prospective cohort study:  
16 perinatal and maternal outcomes by planned place of birth. Birthplace in England research  
17 programme. Final report part 4. NIHR Service Delivery and Organisation programme, 2011.  
18  
19  
20 27. Lindgren HE, Radestad IJ, Christensson K, et al. Outcome of planned home births compared  
21 to hospital births in Sweden between 1992 and 2004. A population-based register study. *Acta Obstet*  
22 *Gynecol Scand*. 2008;**87**(7):751-9. doi: 10.1080/00016340802199903  
23  
24  
25 28. Janssen PA, Saxell L, Page LA, et al. Outcomes of planned home birth with registered midwife  
26 versus planned hospital birth with midwife or physician. *CMAJ*. 2009;**181**(6-7):377-83. doi:  
27 10.1503/cmaj.081869  
28  
29  
30 29. Rowe RE, Fitzpatrick R, Hollowell J, et al. Transfers of women planning birth in midwifery  
31 units: data from the Birthplace prospective cohort study. *BJOG*. 2012;**119**(9):1081-90. doi:  
32 10.1111/j.1471-0528.2012.03414.x  
33  
34  
35 30. Redshaw M, Rowe R, Schroeder L, et al. Mapping maternity care. The configuration of  
36 maternity care in England. Birthplace in England research programme. Final report part 3. NIHR  
37 Service Delivery and Organisation programme;, 2011.  
38  
39  
40 31. Fan J, Gijbels I. Local Polynomial Modelling and Its Applications. London: Chapman & Hall;  
41 1996.  
42  
43  
44 32. Bayrampour H, Heaman M. Advanced Maternal Age and the Risk of Cesarean Birth: A  
45 Systematic Review. *Birth*. 2010;**37**(3):219-26. doi: 10.1111/j.1523-536X.2010.00409.x  
46  
47  
48 33. Bell JS, Campbell DM, Graham WJ, et al. Can obstetric complications explain the high levels  
49 of obstetric interventions and maternity service use among older women? A retrospective analysis  
50 of routinely collected data. *BJOG*. 2001;**108**(9):910-8. doi: 10.1111/j.1471-0528.2001.00214.x  
51  
52  
53  
54  
55  
56  
57  
58  
59  
60



- 1  
2  
3  
4  
5  
6  
7  
8  
9  
10  
11  
12  
13  
14  
15  
16  
17  
18  
19  
20  
21  
22  
23  
24  
25  
26  
27  
28  
29  
30  
31  
32  
33  
34  
35  
36  
37  
38  
39  
40  
41  
42  
43  
44  
45  
46  
47  
48  
49  
50  
51  
52  
53  
54  
55  
56  
57  
58  
59  
60
34. Main DM, Main EK, Moore li DH. The relationship between maternal age and uterine dysfunction: A continuous effect throughout reproductive life. *Am J Obstet Gynecol*. 2000;**182**(6):1312-20. doi: 10.1067/mob.2000.106249
35. Berkowitz GS, Skovron ML, Lapinski RH, et al. Delayed Childbearing and the Outcome of Pregnancy. *N Engl J Med*. 1990;**322**(10):659-64. doi: 10.1056/NEJM199003083221004
36. Greenberg MB, Cheng YW, Sullivan M, et al. Does length of labor vary by maternal age? *Am J Obstet Gynecol*. 2007;**197**(4):428.e1-.e7. doi: 10.1016/j.ajog.2007.06.058
37. Cnattingius R, Cnattingius S, Notzon FC. Obstacles to reducing cesarean rates in a low-cesarean setting: the effect of maternal age, height, and weight. *Obstet Gynecol*. 1998;**92**(4, Part 1):501-6. doi: 10.1016/s0029-7844(98)00244-0
38. Aasheim V, Waldenstrom U, Rasmussen S, et al. Experience of childbirth in first-time mothers of advanced age - a Norwegian population-based study. *BMC Pregnancy Childbirth*. 2013;**13**:53. doi: 10.1186/1471-2393-13-53
39. Bayrampour H, Heaman M, Duncan KA, et al. Comparison of Perception of Pregnancy Risk of Nulliparous Women of Advanced Maternal Age and Younger Age. *Journal of Midwifery & Women's Health*. 2012;**57**(5):445-53. doi: 10.1111/j.1542-2011.2012.00188.x
40. Carolan M, Frankowska D. Advanced maternal age and adverse perinatal outcome: A review of the evidence. *Midwifery*. 2011;**27**(6):793-801. doi: 10.1016/j.midw.2010.07.006

1  
2  
3  
4  
5  
6  
7  
8  
9  
10  
11  
12  
13  
14  
15  
16  
17  
18  
19  
20  
21  
22  
23  
24  
25  
26  
27  
28  
29  
30  
31  
32  
33  
34  
35  
36  
37  
38  
39  
40  
41  
42  
43  
44  
45  
46  
47  
48  
49  
50  
51  
52  
53  
54  
55  
56  
57  
58  
59  
60

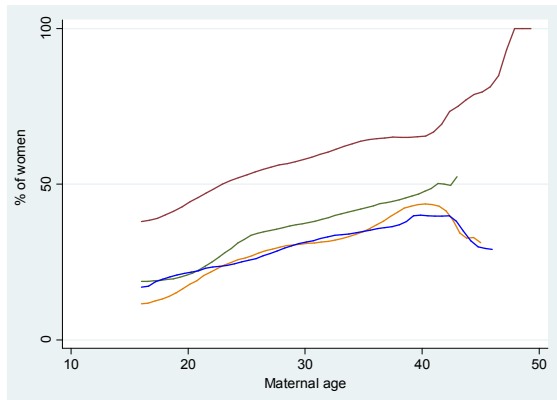

(a) Maternal composite, nulliparous women

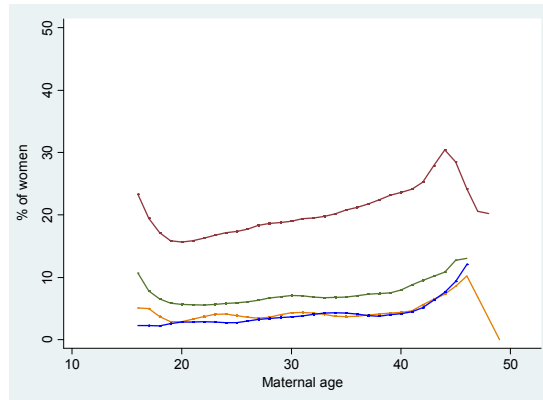

(e) Maternal composite, multiparous women

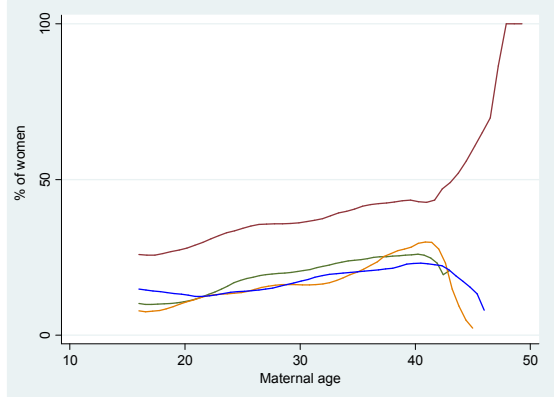

(b) Augmentation, nulliparous women

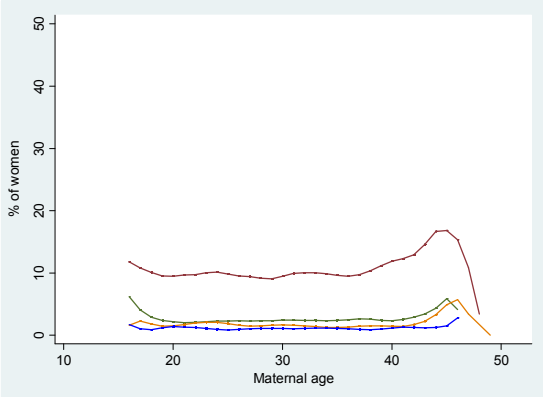

(f) Augmentation, multiparous women

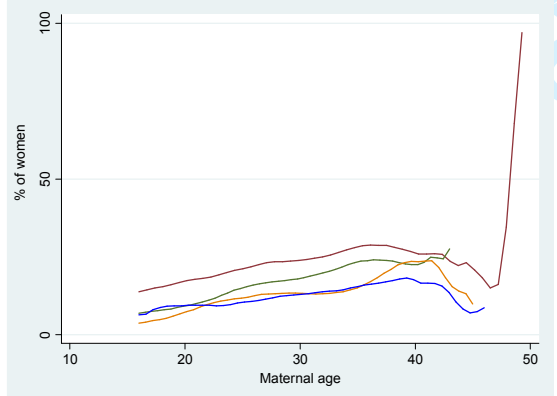

(c) Instrumental delivery, nulliparous women

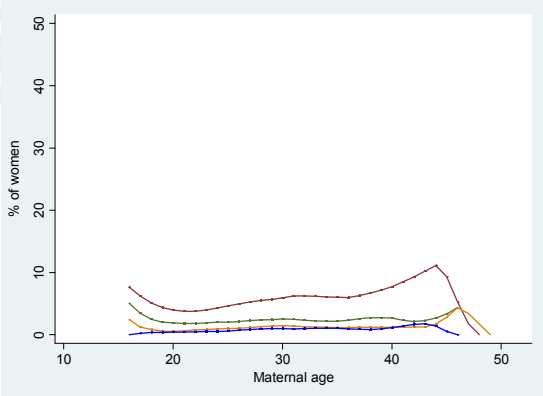

(g) Instrumental delivery, multiparous women

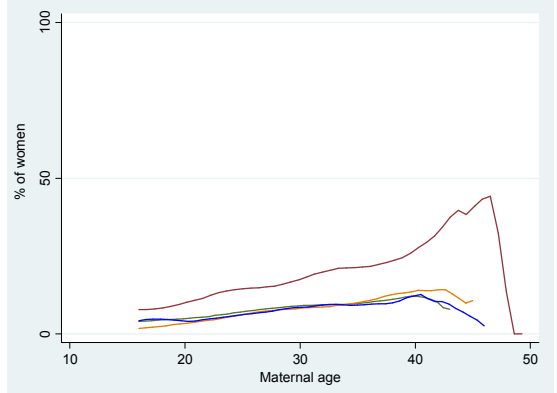

(d) Intrapartum caesarean section, nulliparous

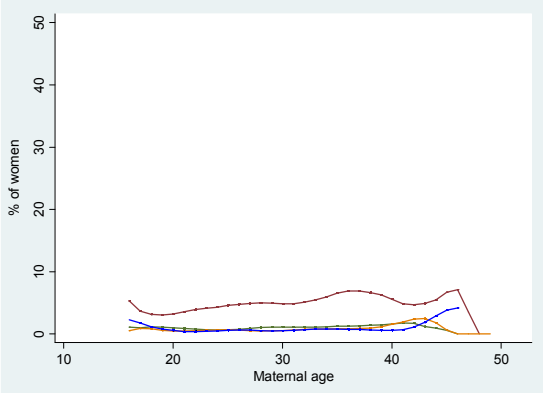

(h) Intrapartum caesarean section, multiparous

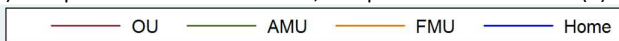

1 **Figure 1 Association between maternal age and intrapartum interventions and adverse maternal outcomes**  
2 **in low risk women aged 16 and over<sup>1</sup>**

3 <sup>1</sup> NOTE THAT scales for nulliparous women and multiparous women are different.  
4  
5  
6  
7  
8  
9  
10  
11  
12  
13  
14  
15  
16  
17  
18  
19  
20  
21  
22  
23  
24  
25  
26  
27  
28  
29  
30  
31  
32  
33  
34  
35  
36  
37  
38  
39  
40  
41  
42  
43  
44  
45  
46  
47  
48  
49  
50  
51  
52  
53  
54  
55  
56  
57  
58  
59  
60

For peer review only

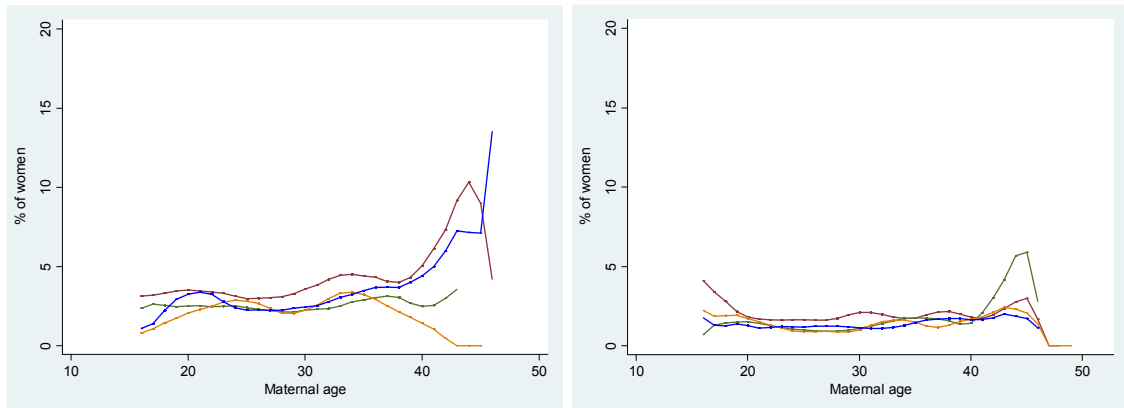

(a) Perinatal composite, nulliparous women

(b) Perinatal composite, multiparous women

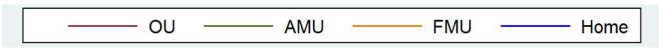

**Figure 2 Association between maternal age and perinatal composite outcome in low risk women aged 16 and over**

1  
2  
3  
4  
5  
6  
7  
8  
9  
10  
11  
12  
13  
14  
15  
16  
17  
18  
19  
20  
21  
22  
23  
24  
25  
26  
27  
28  
29  
30  
31  
32  
33  
34  
35  
36  
37  
38  
39  
40  
41  
42  
43  
44  
45  
46  
47  
48  
49  
50  
51  
52  
53  
54  
55  
56  
57  
58  
59  
60

**Table 1 Characteristics of low risk women aged 16 and over by maternal age category**

|                                            | 16 - 19 years |                | 20 - 24 years |                | 25 - 29 years |                | 30 - 34 years |                | 35 - 39 years |                | ≥ 40 years |                |
|--------------------------------------------|---------------|----------------|---------------|----------------|---------------|----------------|---------------|----------------|---------------|----------------|------------|----------------|
|                                            | n=3354        |                | n=11395       |                | n=18091       |                | n=18453       |                | n=10397       |                | n=1681     |                |
|                                            | n             | % <sup>1</sup> | n          | % <sup>1</sup> |
| <b>Ethnic group</b>                        |               |                |               |                |               |                |               |                |               |                |            |                |
| White                                      | 3078          | 90.1           | 9685          | 81.2           | 15146         | 77.5           | 16052         | 80.7           | 9339          | 84.3           | 1527       | 86.6           |
| Non-white                                  | 275           | 9.9            | 1697          | 18.8           | 2920          | 22.5           | 2375          | 19.3           | 1044          | 15.8           | 153        | 13.4           |
| Missing                                    | 1             |                | 13            |                | 25            |                | 26            |                | 14            |                | 1          |                |
| <b>Understanding of English</b>            |               |                |               |                |               |                |               |                |               |                |            |                |
| Fluent                                     | 3254          | 96.7           | 10394         | 89.6           | 16757         | 90.0           | 17605         | 92.9           | 10155         | 96.3           | 1638       | 96.7           |
| Not fluent                                 | 94            | 3.3            | 948           | 10.4           | 1251          | 10.0           | 776           | 7.1            | 214           | 3.7            | 36         | 3.4            |
| Missing                                    | 6             |                | 53            |                | 83            |                | 72            |                | 28            |                | 7          |                |
| <b>Marital/partner status</b>              |               |                |               |                |               |                |               |                |               |                |            |                |
| Married/living with partner                | 1836          | 51.9           | 9550          | 81.8           | 16868         | 92.1           | 17782         | 96.1           | 10004         | 95.4           | 1591       | 94.4           |
| Single/unsupported by partner              | 1440          | 48.1           | 1677          | 18.2           | 1010          | 7.9            | 493           | 3.9            | 293           | 4.7            | 68         | 5.7            |
| Missing                                    | 78            |                | 168           |                | 213           |                | 178           |                | 100           |                | 22         |                |
| <b>BMI in pregnancy (kg/m<sup>2</sup>)</b> |               |                |               |                |               |                |               |                |               |                |            |                |
| < 18.5                                     | 184           | 6.2            | 426           | 4.2            | 413           | 2.6            | 337           | 2.1            | 156           | 1.5            | 18         | 0.2            |
| 18.5 - 24.9                                | 1753          | 50.3           | 5316          | 45.6           | 8560          | 45.9           | 9059          | 46.7           | 4864          | 44.5           | 802        | 46.4           |
| 25.0 - 29.9                                | 598           | 17.9           | 2558          | 21.7           | 4341          | 24.6           | 4206          | 23.2           | 2572          | 26.9           | 415        | 27.6           |
| 30.0 - 35.0                                | 233           | 7.6            | 1096          | 10.0           | 1627          | 9.3            | 1399          | 8.8            | 769           | 8.9            | 109        | 8.1            |
| Not recorded                               | 581           | 18.1           | 1969          | 18.4           | 3091          | 17.6           | 3389          | 19.2           | 2000          | 18.3           | 329        | 17.7           |
| Missing                                    | 5             |                | 30            |                | 59            |                | 63            |                | 36            |                | 8          |                |
| <b>IMD quintile</b>                        |               |                |               |                |               |                |               |                |               |                |            |                |
| 1 <sup>st</sup> (Least deprived)           | 245           | 6.8            | 1102          | 8.5            | 2875          | 13.8           | 4255          | 20.5           | 2783          | 24.6           | 434        | 26.0           |
| 2 <sup>nd</sup>                            | 405           | 12.3           | 1521          | 13.3           | 3259          | 17.5           | 4114          | 21.7           | 2434          | 22.3           | 396        | 22.0           |
| 3 <sup>rd</sup>                            | 637           | 18.2           | 2115          | 18.0           | 3657          | 18.6           | 3759          | 19.7           | 2135          | 20.0           | 357        | 21.6           |
| 4 <sup>th</sup>                            | 827           | 25.3           | 2784          | 23.9           | 3957          | 22.7           | 3479          | 19.8           | 1765          | 17.9           | 291        | 16.9           |
| 5 <sup>th</sup> (Most deprived)            | 1221          | 37.5           | 3821          | 36.2           | 4262          | 27.5           | 2759          | 18.4           | 1215          | 15.2           | 197        | 13.7           |
| Missing                                    | 19            |                | 52            |                | 81            |                | 87            |                | 65            |                | 6          |                |
| <b>Previous pregnancies ≥ 24 weeks</b>     |               |                |               |                |               |                |               |                |               |                |            |                |
| 0                                          | 2835          | 86.8           | 6341          | 62.0           | 8438          | 53.6           | 7307          | 46.7           | 2989          | 36.9           | 346        | 28.0           |

|                                                                          |      |      |      |      |      |      |      |      |      |      |     |      |
|--------------------------------------------------------------------------|------|------|------|------|------|------|------|------|------|------|-----|------|
| 1                                                                        | 474  | 12.1 | 3772 | 29.4 | 5892 | 29.9 | 6963 | 33.9 | 3929 | 35.5 | 540 | 32.3 |
| 2                                                                        | 38   | 0.8  | 1006 | 6.8  | 2549 | 10.9 | 2779 | 12.2 | 2260 | 17.4 | 414 | 20.2 |
| 3-5                                                                      | 7    | 0.3  | 276  | 1.9  | 1212 | 5.6  | 1404 | 7.2  | 1219 | 10.2 | 381 | 19.5 |
| Missing                                                                  |      |      |      |      |      |      |      |      |      |      |     |      |
| <b>Gestation at delivery (completed weeks)</b>                           |      |      |      |      |      |      |      |      |      |      |     |      |
| 37                                                                       | 119  | 4.1  | 351  | 3.5  | 530  | 3.6  | 534  | 3.5  | 275  | 3.1  | 52  | 3.2  |
| 38                                                                       | 305  | 11.0 | 1136 | 10.1 | 1743 | 9.9  | 1739 | 9.9  | 971  | 10.2 | 146 | 9.9  |
| 39                                                                       | 783  | 22.5 | 2788 | 24.4 | 4409 | 24.2 | 4439 | 23.5 | 2516 | 23.2 | 410 | 27.2 |
| 40                                                                       | 1292 | 36.7 | 4361 | 36.7 | 6970 | 36.2 | 7090 | 37.5 | 3933 | 35.9 | 639 | 35.0 |
| 41 - 42+0 days                                                           | 855  | 25.7 | 2759 | 25.3 | 4439 | 26.1 | 4651 | 25.6 | 2702 | 27.7 | 434 | 24.7 |
| <b>Planned place of birth</b>                                            |      |      |      |      |      |      |      |      |      |      |     |      |
| OU                                                                       | 1445 | 87.5 | 4150 | 84.9 | 5601 | 82.6 | 4946 | 80.7 | 2571 | 80.2 | 497 | 83.2 |
| AMU                                                                      | 1038 | 8.5  | 3445 | 9.6  | 4958 | 10.1 | 4540 | 10.3 | 2212 | 9.6  | 294 | 7.9  |
| FMU                                                                      | 661  | 3.2  | 2115 | 3.5  | 3242 | 3.8  | 3216 | 3.9  | 1674 | 3.8  | 249 | 3.0  |
| Home                                                                     | 210  | 0.8  | 1685 | 2.0  | 4290 | 3.5  | 5751 | 5.1  | 3940 | 6.4  | 641 | 5.8  |
| <b>Birth weight (grams)</b>                                              |      |      |      |      |      |      |      |      |      |      |     |      |
| < 2500                                                                   | 53   | 1.9  | 146  | 1.8  | 166  | 1.4  | 159  | 1.1  | 75   | 1.0  | 17  | 1.3  |
| 2500 - 2999                                                              | 561  | 18.4 | 1728 | 16.4 | 2281 | 14.5 | 1924 | 12.7 | 1100 | 12.5 | 168 | 12.8 |
| 3000 - 3499                                                              | 1502 | 44.6 | 4678 | 41.1 | 7171 | 39.3 | 6960 | 38.2 | 3644 | 36.5 | 596 | 37.1 |
| 3500 - 3999                                                              | 977  | 28.4 | 3664 | 30.9 | 6256 | 33.4 | 6767 | 35.0 | 3888 | 35.3 | 617 | 36.9 |
| 4000 - 4499                                                              | 233  | 6.0  | 1023 | 8.7  | 1926 | 10.0 | 2294 | 11.4 | 1432 | 12.5 | 239 | 9.9  |
| ≥ 4500                                                                   | 21   | 0.7  | 135  | 1.2  | 262  | 1.5  | 303  | 1.6  | 237  | 2.3  | 40  | 2.0  |
| Missing                                                                  | 7    |      | 21   |      | 29   |      | 46   |      | 21   |      | 4   |      |
| <b>Complicating conditions identified at the start of care in labour</b> |      |      |      |      |      |      |      |      |      |      |     |      |
| Prolonged rupture of membranes > 18 hours                                | 145  | 7.1  | 411  | 6.1  | 678  | 6.5  | 706  | 7.1  | 415  | 7.0  | 78  | 8.9  |
| Meconium stained liquor                                                  | 126  | 5.8  | 322  | 4.8  | 469  | 5.0  | 541  | 6.1  | 295  | 5.9  | 60  | 7.4  |
| Proteinuria 1+ or more                                                   | 79   | 2.3  | 203  | 1.7  | 261  | 1.9  | 226  | 1.6  | 109  | 1.7  | 20  | 1.6  |
| Hypertension                                                             | 55   | 2.6  | 160  | 2.2  | 232  | 2.4  | 207  | 2.0  | 102  | 2.1  | 17  | 2.0  |
| Abnormal vaginal bleeding                                                | 16   | 0.7  | 57   | 0.9  | 79   | 0.9  | 119  | 1.5  | 77   | 2.1  | 16  | 2.1  |

|                                   |            |             |             |             |             |             |             |             |             |             |            |             |
|-----------------------------------|------------|-------------|-------------|-------------|-------------|-------------|-------------|-------------|-------------|-------------|------------|-------------|
| Non-cephalic presentation         | 5          | 0.2         | 31          | 0.5         | 44          | 0.4         | 64          | 0.5         | 46          | 0.7         | 3          | 0.3         |
| Abnormal fetal heart rate         | 41         | 1.5         | 106         | 1.7         | 162         | 1.8         | 143         | 1.7         | 82          | 1.7         | 27         | 3.0         |
| Other complications               | 14         | 0.6         | 24          | 0.3         | 23          | 0.2         | 27          | 0.1         | 11          | 0.2         | 2          | 0.2         |
| <b>Any complicating condition</b> | <b>431</b> | <b>18.5</b> | <b>1175</b> | <b>16.1</b> | <b>1744</b> | <b>16.6</b> | <b>1829</b> | <b>18.0</b> | <b>1001</b> | <b>18.1</b> | <b>199</b> | <b>22.5</b> |

<sup>1</sup> Probability weights are incorporated to account for differences in the probability of a woman being selected for inclusion in the study arising from differences in each unit/trust's period of participation and the stratum specific probabilities of selection of OUs.

**Table 2 Association between maternal age (per 5-year increase) and maternal and perinatal outcomes in low risk women aged between 16 and 40 years old (inclusive)**

|                                          | Nulliparous women         |             |                         |                   | Multiparous women         |             |                         |                  |
|------------------------------------------|---------------------------|-------------|-------------------------|-------------------|---------------------------|-------------|-------------------------|------------------|
|                                          | Unadjusted <sup>1</sup>   |             | Adjusted <sup>1,2</sup> |                   | Unadjusted <sup>1</sup>   |             | Adjusted <sup>1,2</sup> |                  |
|                                          | RR                        | (95% CI)    | RR                      | (95% CI)          | RR                        | (95% CI)    | RR                      | (95% CI)         |
| Maternal composite                       | 1.13                      | (1.11-1.16) | 1.13                    | (1.11-1.16)       | 1.07                      | (1.03-1.13) | 1.08                    | (1.03-1.14)      |
| OU                                       | 1.13                      | (1.11-1.16) | 1.12                    | (1.10-1.15)       |                           |             |                         |                  |
| Non-OU <sup>1,3</sup>                    | 1.22                      | (1.19-1.26) | 1.21                    | (1.18-1.25)       |                           |             |                         |                  |
|                                          | Wald test for interaction |             |                         |                   | Wald test for interaction |             |                         |                  |
|                                          |                           |             |                         | $P^{1,4} < 0.001$ |                           |             |                         | $P^{1,4} = 0.34$ |
| Augmentation                             | 1.13                      | (1.09-1.16) | 1.12                    | (1.08-1.17)       | 1.00                      | (0.92-1.08) | 1.01                    | (0.92-1.11)      |
| OU                                       | 1.13                      | (1.09-1.17) | 1.12                    | (1.07-1.17)       |                           |             |                         |                  |
| Non-OU <sup>1,3</sup>                    | 1.25                      | (1.20-1.31) | 1.23                    | (1.18-1.28)       |                           |             |                         |                  |
|                                          | Wald test for interaction |             |                         |                   | Wald test for interaction |             |                         |                  |
|                                          |                           |             |                         | $P^{1,4} < 0.001$ |                           |             |                         | $P^{1,4} = 0.24$ |
| Instrumental delivery                    | 1.20                      | (1.13-1.26) | 1.18                    | (1.12-1.25)       | 1.14                      | (1.04-1.25) | 1.15                    | (1.05-1.27)      |
|                                          | Wald test for interaction |             |                         |                   | Wald test for interaction |             |                         |                  |
|                                          |                           |             |                         | $P^{1,4} = 0.18$  |                           |             |                         | $P^{1,4} = 0.06$ |
| Intrapartum caesarean section            | 1.27                      | (1.23-1.31) | 1.27                    | (1.23-1.32)       | 1.16                      | (1.07-1.26) | 1.16                    | (1.06-1.28)      |
|                                          | Wald test for interaction |             |                         |                   | Wald test for interaction |             |                         |                  |
|                                          |                           |             |                         | $P^{1,4} = 0.26$  |                           |             |                         | $P^{1,4} = 0.50$ |
| General anaesthesia                      | 1.06                      | (0.93-1.20) | 1.06                    | (0.92-1.22)       | 1.05                      | (0.87-1.27) | 1.09                    | (0.91-1.32)      |
|                                          | Wald test for interaction |             |                         |                   | Wald test for interaction |             |                         |                  |
|                                          |                           |             |                         | $P^{1,4} = 0.83$  |                           |             |                         | $P^{1,4} = 0.15$ |
| Maternal blood transfusion               | 1.09                      | (0.97-1.23) | 1.13                    | (0.95-1.34)       | 1.23                      | (0.95-1.60) | 1.24                    | (0.94-1.62)      |
|                                          | Wald test for interaction |             |                         |                   | Wald test for interaction |             |                         |                  |
|                                          |                           |             |                         | $P^{1,4} = 0.38$  |                           |             |                         | $P^{1,4} = 0.44$ |
| Third/fourth degree perineal tear        | 1.17                      | (1.09-1.27) | 1.12                    | (1.02-1.23)       | 1.10                      | (0.98-1.23) | 1.01                    | (0.89-1.15)      |
|                                          | Wald test for interaction |             |                         |                   | Wald test for interaction |             |                         |                  |
|                                          |                           |             |                         | $P^{1,4} = 0.43$  |                           |             |                         | $P^{1,4} = 0.29$ |
| Maternal admission for higher level care | 1.28                      | (1.03-1.58) | 1.46                    | (1.07-1.99)       | 1.40                      | (1.01-1.92) | 1.49                    | (1.06-2.10)      |
|                                          | Wald test for interaction |             |                         |                   | Wald test for interaction |             |                         |                  |
|                                          |                           |             |                         | $P^{1,4} = 0.41$  |                           |             |                         | $P^{1,4} = 0.15$ |
| Perinatal composite                      | 1.07                      | (0.97-1.17) | 1.06                    | (0.95-1.17)       | 1.02                      | (0.87-1.19) | 0.98                    | (0.84-1.15)      |
|                                          | Wald test for interaction |             |                         |                   | Wald test for interaction |             |                         |                  |
|                                          |                           |             |                         | $P^{1,4} = 0.92$  |                           |             |                         | $P^{1,4} = 0.66$ |

<sup>1</sup> Probability weights are incorporated to account for differences in the probability of a woman being selected for inclusion in the study arising from differences in each unit/trust's period of participation and the stratum specific probabilities of selection of OUs.



1  
2  
3  
4  
5 <sup>2</sup> Adjusted for ethnic group, understanding of English, marital/partner status, BMI in pregnancy, index of multiple deprivation score quintile, gestation at  
6 delivery, and planned place of birth (OU vs. AMU vs. FMU vs. home).  
7

8 <sup>3</sup> Results in these rows were adjusted for ethnic group, understanding of English, marital/partner status, BMI in pregnancy, index of multiple deprivation  
9 score quintile, and gestation at delivery.  
10

11 <sup>4</sup> P for interaction, results in these rows were adjusted for ethnic group, understanding of English, marital/partner status, BMI in pregnancy, index of  
12 multiple deprivation score quintile, gestation at delivery, and planned place of birth (OU vs. non-OU).  
13  
14  
15  
16  
17  
18  
19  
20  
21  
22  
23  
24  
25  
26  
27  
28  
29  
30  
31  
32  
33  
34  
35  
36  
37  
38  
39  
40  
41  
42  
43  
44  
45  
46  
47  
48  
49

**Table 3 Intrapartum interventions and adverse maternal outcomes by maternal age in low risk nulliparous women aged 16 and over**

| Age (years)                          | Events / Births<br>n/N | OU                         |             | Events / Births<br>n/N | Non-OU                     |             |
|--------------------------------------|------------------------|----------------------------|-------------|------------------------|----------------------------|-------------|
|                                      |                        | Weighted <sup>1</sup><br>% | (95% CI)    |                        | Weighted <sup>1</sup><br>% | (95% CI)    |
| <b>Maternal composite</b>            |                        |                            |             |                        |                            |             |
| 16-19                                | 480/1239               | 39.4                       | (35.6-43.3) | 252/1553               | 17.5                       | (15.2-20.1) |
| 20-24                                | 1229/2577              | 47.9                       | (44.7-51.1) | 886/3679               | 24.2                       | (21.8-26.8) |
| 25-29                                | 1670/3003              | 55.6                       | (53.4-57.9) | 1680/5354              | 32.3                       | (29.5-35.2) |
| 30-34                                | 1402/2322              | 61.1                       | (57.3-64.8) | 1730/4897              | 36.6                       | (34.2-39.1) |
| 35-39                                | 622/957                | 65.5                       | (61.8-69.1) | 792/1995               | 39.9                       | (36.0-43.9) |
| 40+                                  | 108/148                | 71.9                       | (63.0-79.3) | 83/196                 | 44.8                       | (35.2-54.7) |
| Total                                | 5511/10246             | 54.4                       | (51.9-56.9) | 5423/17674             | 31.3                       | (29.3-33.4) |
| <b>Augmentation</b>                  |                        |                            |             |                        |                            |             |
| 16-19                                | 317/1245               | 25.9                       | (22.5-29.7) | 141/1564               | 8.6                        | (7.0-10.5)  |
| 20-24                                | 790/2584               | 30.7                       | (26.9-34.7) | 489/3706               | 12.9                       | (11.1-14.9) |
| 25-29                                | 1079/3011              | 35.7                       | (33.4-38.1) | 918/5372               | 17.4                       | (15.6-19.3) |
| 30-34                                | 867/2318               | 37.5                       | (34.1-41.1) | 964/4921               | 19.9                       | (18.3-21.7) |
| 35-39                                | 402/955                | 42.2                       | (36.4-48.1) | 473/2015               | 22.6                       | (19.8-25.7) |
| 40+                                  | 71/149                 | 47.6                       | (37.0-58.4) | 44/196                 | 23.7                       | (15.7-34.1) |
| Total                                | 3526/10262             | 34.6                       | (31.9-37.4) | 3029/17774             | 16.9                       | (15.7-18.1) |
| <b>Instrumental delivery</b>         |                        |                            |             |                        |                            |             |
| 16-19                                | 191/1266               | 15.1                       | (12.5-18.2) | 99/1568                | 7.9                        | (6.2-10.2)  |
| 20-24                                | 469/2618               | 17.9                       | (15.9-20.0) | 392/3717               | 10.6                       | (8.9-12.5)  |
| 25-29                                | 707/3039               | 23.4                       | (21.3-25.6) | 772/5391               | 15.0                       | (13.1-17.0) |
| 30-34                                | 591/2349               | 26.3                       | (21.3-32.1) | 795/4950               | 17.0                       | (15.2-19.1) |
| 35-39                                | 275/968                | 29.5                       | (25.0-34.4) | 401/2018               | 19.4                       | (15.9-23.6) |
| 40+                                  | 41/149                 | 30.4                       | (20.0-43.2) | 37/197                 | 21.0                       | (13.3-31.5) |
| Total                                | 2274/10389             | 22.5                       | (19.9-25.3) | 2496/17841             | 14.5                       | (13.0-16.0) |
| <b>Intrapartum caesarean section</b> |                        |                            |             |                        |                            |             |
| 16-19                                | 101/1266               | 8.3                        | (6.5-10.5)  | 55/1568                | 3.3                        | (2.5-4.2)   |
| 20-24                                | 313/2618               | 12.2                       | (10.4-14.2) | 194/3717               | 5.2                        | (4.2-6.5)   |
| 25-29                                | 461/3039               | 15.2                       | (13.3-17.2) | 408/5391               | 8.0                        | (6.9-9.3)   |
| 30-34                                | 466/2349               | 19.8                       | (17.5-22.3) | 452/4950               | 9.0                        | (7.9-10.4)  |
| 35-39                                | 223/968                | 23.0                       | (19.8-26.5) | 212/2018               | 11.2                       | (9.0-13.9)  |
| 40+                                  | 47/149                 | 29.2                       | (20.9-39.3) | 22/197                 | 9.7                        | (5.2-17.2)  |
| Total                                | 1611/10389             | 15.7                       | (14.1-17.5) | 1343/17841             | 7.6                        | (6.8-8.4)   |

<sup>1</sup> Probability weights are incorporated to account for differences in the probability of a woman being selected for inclusion in the study arising from differences in each unit/trust's period of participation and the stratum specific probabilities of selection of OUs.

Table 4 Relative risk for non-OU compared to OU by age groups in nulliparous women

| Age (years)               | Unadjusted RR <sup>1</sup><br>(95% CI) | Adjusted RR <sup>1,2</sup> (95% CI) | Adjusted RR <sup>1,3</sup> (95% CI) |
|---------------------------|----------------------------------------|-------------------------------------|-------------------------------------|
| <b>Maternal composite</b> |                                        |                                     |                                     |
| 16-19                     | 0.44 (0.38-0.53)                       | 0.45 (0.38-0.54)                    | 0.49 (0.42-0.58)                    |
| 20-24                     | 0.51 (0.45-0.57)                       | 0.51 (0.45-0.58)                    | 0.55 (0.49-0.62)                    |
| 25-29                     | 0.58 (0.53-0.64)                       | 0.59 (0.54-0.65)                    | 0.63 (0.57-0.70)                    |
| 30-34                     | 0.60 (0.55-0.66)                       | 0.61 (0.56-0.67)                    | 0.66 (0.60-0.73)                    |
| 35-39                     | 0.61 (0.54-0.68)                       | 0.62 (0.56-0.69)                    | 0.68 (0.61-0.76)                    |
| 40+                       | 0.62 (0.49-0.80)                       | 0.66 (0.51-0.87)                    | 0.70 (0.53-0.93)                    |
| <b>Augmentation</b>       |                                        |                                     |                                     |
| 16-19                     | 0.33 (0.26-0.42)                       | 0.34 (0.27-0.44)                    | 0.37 (0.29-0.47)                    |
| 20-24                     | 0.42 (0.35-0.51)                       | 0.43 (0.35-0.52)                    | 0.47 (0.39-0.57)                    |
| 25-29                     | 0.49 (0.43-0.55)                       | 0.50 (0.45-0.57)                    | 0.56 (0.49-0.63)                    |
| 30-34                     | 0.53 (0.47-0.60)                       | 0.55 (0.48-0.63)                    | 0.61 (0.53-0.71)                    |
| 35-39                     | 0.54 (0.44-0.65)                       | 0.54 (0.46-0.64)                    | 0.61 (0.51-0.74)                    |
| 40+                       | 0.50 (0.32-0.78)                       | 0.53 (0.33-0.84)                    | 0.58 (0.36-0.94)                    |

<sup>1</sup> Probability weights are incorporated to account for differences in the probability of a woman being selected for inclusion in the study arising from differences in each unit/trust's period of participation and the stratum specific probabilities of selection of OUs.

<sup>2</sup> Adjusted for ethnic group, understanding of English, marital/partner status, BMI in pregnancy, index of multiple deprivation score quintile, and gestation at delivery.

<sup>3</sup> Adjusted for ethnic group, understanding of English, marital/partner status, BMI in pregnancy, index of multiple deprivation score quintile, gestation at delivery, and complicating conditions identified at the start of care in labour.

**Table 5 Intrapartum interventions and adverse maternal outcomes by maternal age in low risk multiparous women aged 16 and over**

| Age (years)                          | Events /<br>Births<br>n/N | OU                         |             | Events /<br>Births<br>n/N | Non-OU                     |            |
|--------------------------------------|---------------------------|----------------------------|-------------|---------------------------|----------------------------|------------|
|                                      |                           | Weighted <sup>1</sup><br>% | (95% CI)    |                           | Weighted <sup>1</sup><br>% | (95% CI)   |
| <b>Maternal composite</b>            |                           |                            |             |                           |                            |            |
| 16-19                                | 35/177                    | 20.2                       | (14.1-28.0) | 20/338                    | 6.6                        | (4.1-10.6) |
| 20-24                                | 242/1506                  | 16.2                       | (13.8-19.0) | 146/3486                  | 4.6                        | (3.6-5.8)  |
| 25-29                                | 468/2504                  | 18.9                       | (16.9-20.9) | 297/6989                  | 4.8                        | (4.1-5.7)  |
| 30-34                                | 492/2548                  | 19.2                       | (16.8-21.8) | 418/8440                  | 5.4                        | (4.7-6.2)  |
| 35-39                                | 344/1575                  | 21.9                       | (19.4-24.7) | 273/5737                  | 5.6                        | (4.8-6.6)  |
| 40+                                  | 82/340                    | 24.1                       | (20.7-28.0) | 65/975                    | 7.4                        | (5.6-9.7)  |
| Total                                | 1663/8650                 | 19.3                       | (17.6-21.1) | 1219/25965                | 5.3                        | (4.7-5.9)  |
| <b>Augmentation</b>                  |                           |                            |             |                           |                            |            |
| 16-19                                | 19/178                    | 10.5                       | (5.9-17.9)  | 11/340                    | 3.8                        | (2.0-7.1)  |
| 20-24                                | 144/1516                  | 9.4                        | (7.5-11.8)  | 62/3520                   | 2.0                        | (1.4-2.7)  |
| 25-29                                | 247/2529                  | 9.9                        | (8.2-12.0)  | 109/7077                  | 1.8                        | (1.4-2.3)  |
| 30-34                                | 255/2572                  | 9.7                        | (8.0-11.7)  | 132/8535                  | 1.6                        | (1.3-2.0)  |
| 35-39                                | 156/1592                  | 9.8                        | (8.2-11.6)  | 89/5796                   | 1.8                        | (1.3-2.5)  |
| 40+                                  | 42/345                    | 12.2                       | (9.5-15.5)  | 18/985                    | 1.8                        | (1.1-3.2)  |
| Total                                | 863/8732                  | 9.8                        | (8.5-11.4)  | 421/26253                 | 1.8                        | (1.5-2.1)  |
| <b>Instrumental delivery</b>         |                           |                            |             |                           |                            |            |
| 16-19                                | 12/179                    | 7.5                        | (3.6-14.9)  | 7/340                     | 3.1                        | (1.3-7.1)  |
| 20-24                                | 55/1530                   | 3.6                        | (2.7-4.9)   | 38/3520                   | 1.4                        | (1.0-2.0)  |
| 25-29                                | 139/2557                  | 5.5                        | (4.6-6.5)   | 102/7092                  | 1.8                        | (1.4-2.3)  |
| 30-34                                | 159/2594                  | 6.1                        | (5.0-7.5)   | 124/8544                  | 1.6                        | (1.2-2.0)  |
| 35-39                                | 102/1600                  | 6.6                        | (5.0-8.6)   | 82/5802                   | 1.8                        | (1.4-2.4)  |
| 40+                                  | 30/347                    | 8.8                        | (5.5-13.8)  | 17/987                    | 2.5                        | (1.3-4.7)  |
| Total                                | 497/8807                  | 5.7                        | (4.9-6.7)   | 370/26285                 | 1.7                        | (1.4-2.1)  |
| <b>Intrapartum caesarean section</b> |                           |                            |             |                           |                            |            |
| 16-19                                | 6/179                     | 3.4                        | (1.4-7.7)   | 4/340                     | 0.9                        | (0.3-2.5)  |
| 20-24                                | 62/1530                   | 4.1                        | (2.6-6.3)   | 21/3520                   | 0.6                        | (0.3-1.1)  |
| 25-29                                | 121/2557                  | 4.8                        | (3.8-6.1)   | 48/7092                   | 0.7                        | (0.5-0.9)  |
| 30-34                                | 134/2594                  | 5.1                        | (4.0-6.5)   | 70/8544                   | 0.9                        | (0.6-1.2)  |
| 35-39                                | 110/1600                  | 6.8                        | (5.1-9.1)   | 53/5802                   | 1.1                        | (0.8-1.5)  |
| 40+                                  | 16/347                    | 4.8                        | (3.1-7.4)   | 15/987                    | 1.5                        | (0.8-2.7)  |
| Total                                | 449/8807                  | 5.1                        | (4.2-6.3)   | 211/26285                 | 0.8                        | (0.7-1.1)  |

<sup>1</sup> Probability weights are incorporated to account for differences in the probability of a woman being selected for inclusion in the study arising from differences in each unit/trust's period of participation and the stratum specific probabilities of selection of OUs.

Table 6 Perinatal outcomes by maternal age in low risk women aged 16 and over

| Age (years)        | OU                     |                                     | Non-OU                 |                                     |
|--------------------|------------------------|-------------------------------------|------------------------|-------------------------------------|
|                    | Events / Births<br>n/N | Weighted <sup>1</sup><br>% (95% CI) | Events / Births<br>n/N | Weighted <sup>1</sup><br>% (95% CI) |
| <b>Nulliparous</b> |                        |                                     |                        |                                     |
| 16-19              | 39/1260                | 3.2 (2.2-4.5)                       | 31/1553                | 2.9 (1.9-4.4)                       |
| 20-24              | 89/2610                | 3.5 (2.5-5.0)                       | 94/3700                | 2.4 (1.9-3.2)                       |
| 25-29              | 92/3026                | 3.3 (2.6-4.0)                       | 123/5357               | 2.1 (1.7-2.8)                       |
| 30-34              | 101/2340               | 4.2 (3.1-5.6)                       | 128/4918               | 3.0 (2.2-4.0)                       |
| 35-39              | 37/962                 | 3.9 (2.8-5.4)                       | 65/1999                | 3.0 (2.1-4.1)                       |
| 40+                | 10/149                 | 7.5 (3.4-15.7)                      | 8/195                  | 3.9 (1.0-14.0)                      |
| Total              | 368/10347              | 3.7 (2.9-4.6)                       | 449/17722              | 2.6 (2.2-3.1)                       |
| <b>Multiparous</b> |                        |                                     |                        |                                     |
| 16-19              | 6/179                  | 3.0 (1.4-6.4)                       | 5/337                  | 1.7 (0.6-4.6)                       |
| 20-24              | 26/1519                | 1.8 (1.2-2.7)                       | 43/3489                | 1.3 (0.8-2.0)                       |
| 25-29              | 41/2547                | 1.6 (1.2-2.3)                       | 73/7032                | 1.1 (0.8-1.6)                       |
| 30-34              | 50/2578                | 2.0 (1.5-2.6)                       | 111/8468               | 1.2 (1.0-1.5)                       |
| 35-39              | 33/1594                | 2.1 (1.3-3.3)                       | 88/5761                | 1.6 (1.2-2.2)                       |
| 40+                | 7/345                  | 2.1 (0.9-4.6)                       | 20/978                 | 2.3 (1.3-4.1)                       |
| Total              | 163/8762               | 1.9 (1.5-2.4)                       | 340/26065              | 1.3 (1.1-1.6)                       |

<sup>1</sup> Probability weights are incorporated to account for differences in the probability of a woman being selected for inclusion in the study arising from differences in each unit/trust's period of participation and the stratum specific probabilities of selection of OUs.

1  
2  
3 **The effect of maternal age and planned place of birth on intrapartum**  
4 **outcomes in healthy women with straightforward pregnancies:**  
5 **secondary analysis of the Birthplace national prospective cohort**  
6 **study**  
7  
8  
9

10  
11  
12  
13  
14 **Authors**

15  
16  
17 Yangmei Li,<sup>1</sup> John Townend,<sup>1</sup> Rachel Rowe,<sup>1</sup> Marian Knight,<sup>1</sup> Peter Brocklehurst,<sup>2</sup> Jennifer Hollowell<sup>1</sup>

18  
19  
20 <sup>1</sup> [Policy Research Unit in Maternal Health and Care](#), National Perinatal Epidemiology Unit, [Nuffield](#)  
21 [Department of Population Health](#), University of Oxford, Oxford, UK  
22

23  
24 <sup>2</sup> Institute for Women's Health, University College London, London, UK  
25

26  
27  
28  
29 **Corresponding author**

30  
31  
32 Jennifer Hollowell PhD, Policy Research Unit in Maternal Health and Care, National Perinatal  
33 Epidemiology Unit, [Nuffield Department of Population Health](#), University of Oxford, Old Road  
34 Campus, Headington, Oxford, OX3 7LF, United Kingdom  
35

36  
37  
38 Tel: +44 (0)1865 289452 (direct)/289700 (messages)

39  
40 Fax: +44 (0)1865 289701

41  
42  
43 Email: [jennifer.hollowell@npeu.ox.ac.uk](mailto:jennifer.hollowell@npeu.ox.ac.uk)  
44

45  
46 **Keywords**

47  
48 Maternal age, parity, birthing centre, home birth, augmentation, instrumental delivery, caesarean  
49 section, adverse maternal outcomes, adverse perinatal outcomes  
50

51  
52  
53 **Word count**

54  
55  
56 Main text 4, [277-630](#) words  
57  
58  
59  
60

## Abstract

### Objectives

To describe the relationship between maternal age and intrapartum outcomes in 'low risk' women; and to evaluate whether the relationship between maternal age and intrapartum interventions and adverse outcomes differs by planned place of birth

### Design

Prospective cohort study

### Setting

Obstetric units, midwifery units and planned home births in England

### Participants

63,371 women aged over 16 without ~~any~~ known medical or obstetric risk factors, with singleton pregnancies, planning ~~a~~-vaginal birth

### Methods

Log Poisson regression was used to evaluate the association between maternal age, modelled as a continuous and categorical variable, and risk of intrapartum interventions and adverse maternal and perinatal outcomes.

### Main Outcome Measures

Intrapartum caesarean section, instrumental delivery, syntocinon augmentation and a composite measure of maternal interventions/adverse outcomes requiring obstetric care encompassing augmentation, instrumental delivery, intrapartum caesarean section, general anaesthesia, ~~maternal~~ blood transfusion, 3<sup>rd</sup>/4<sup>th</sup> degree ~~perineal~~ tear, maternal admission ~~for higher level care~~; adverse perinatal outcome (~~composite of encompassing~~ neonatal unit admission or perinatal death).

### Results

Interventions and adverse maternal outcomes requiring obstetric care generally increased with age, particularly in nulliparous women. For nulliparous women aged 16-40, the risk of experiencing an intervention or adverse outcome requiring obstetric care increased more steeply with age in planned non-obstetric unit births than in planned obstetric unit births (adjusted RR 1.21 per 5-year

1 increase in age, 95% CI 1.18-1.25 vs. adjusted RR 1.12, 95% CI 1.10-1.15) but absolute risks were  
2 lower in planned non-OU births at all ages. The risk of neonatal unit admission or perinatal death  
3 was significantly raised in nulliparous women aged 40+ relative to women aged 25-29 (adjusted RR  
4 2.29, 95% CI 1.28-4.09).  
5  
6

## 8 **Conclusions**

10 At all ages 'low risk' women who plan birth in a non-obstetric unit setting tend to experience lower  
11 intervention rates than comparable women who plan birth in an OU. Younger nulliparous women  
12 appear to benefit more from this reduction than older nulliparous women. Younger nulliparous  
13 women appear to benefit more than older nulliparous women from planned birth in a non-obstetric  
14 unit setting. Age 40 is an appropriate threshold for recommending individual assessment when  
15 planning place of birth.  
16  
17  
18  
19  
20  
21  
22  
23  
24  
25  
26  
27  
28  
29  
30  
31  
32  
33  
34  
35  
36  
37  
38  
39  
40  
41  
42  
43  
44  
45  
46  
47  
48  
49  
50  
51  
52  
53  
54  
55  
56  
57  
58  
59  
60



## Article summary

### Article focus

- Does increasing age in women without known medical or obstetric risk factors increase the risk of intrapartum interventions and adverse outcomes that might affect their choice of planned place of birth?

### Key messages

- Older women having a first baby appear to benefit less than younger women from planned birth in a non-obstetric unit setting.
- The chances of experiencing an intervention or outcome that requires obstetric care increase with age, even in women who do not have known risk factors.
- Increased intervention rates at older ages may partly reflect women's expectations and preferences and possibly 'higher risk' labelling by clinicians.

### Strengths and weaknesses

#### Strengths

- The study was based on a large, nationally representative cohort of 'low risk' women, with high quality data collected prospectively.

#### Weaknesses

- The number of women over 40 was relatively small so the study had limited power to explore effects in women over 40, particularly in non-obstetric unit settings.
- Planned births in non-obstetric unit settings were combined; graphical plots indicated that this was reasonable but important differences between settings cannot be ruled out.

## Background

The proportion of births in women aged 35 and over has been steadily rising in recent years in the UK and elsewhere.[1, 2] Currently approximately 16% of births in England and Wales are to women aged 35-39 and 4% of births are to women aged 40 and over.[1]

Advanced maternal age is associated with an increased risk of pregnancy complications including gestational diabetes,[3] pregnancy induced hypertension and preeclampsia,[4, 5] twin or higher order pregnancies,[3] breech presentation,[6] placenta praevia,[3, 7-9] preterm birth,[5, 10] post-term birth,[11], severe maternal morbidity,[12] and adverse perinatal outcomes including antepartum stillbirth,[13] intrapartum-related perinatal death,[14] early neonatal death[15] and neonatal unit admission.[5] Older women also have an increased risk of interventions such as induction and caesarean section.[16-20] However, many age-related pregnancy complications are known risk factors for intrapartum complications or adverse perinatal outcomes and women with these risk factors would normally be advised to give birth in an obstetric unit (OU). Relatively little is known about the incidence of intrapartum interventions and adverse maternal and perinatal outcomes in older women who do not have known risk factors.[21]

The ~~C~~current clinical guidelines in England[22] recommends that healthy women with straightforward pregnancies should be offered a choice of planned birth at home, in a midwife-led unit or in an obstetric unit, but also suggest individual assessment when planning place of birth for women over 40 at booking.[22] The evidence for 'low risk' women in general shows that planned birth in a non-OU setting is associated with a lower incidence of intrapartum interventions[22-28] and research has demonstrated that in 'low risk' women, after adjustment for maternal characteristics, planned birth in a midwifery unit and planned birth at home (multiparous women only) is not associated with an increased risk to the baby compared with planned birth in an OU.[25] However, ~~rates of intrapartum transfer increase with age in nulliparous women~~[29] ~~and, more generally,~~ the risks that might affect the choice of planned place of birth (~~PPOB~~) by healthy older women (~~and in particular nulliparous older women~~) are not well documented.

The aim of this study was to evaluate the association between maternal age and intrapartum interventions and adverse maternal and perinatal outcomes that may influence the choice of planned place of birth, in 'low risk' women with singleton, term pregnancies planning a vaginal birth.

The main objectives were to describe the relationship between maternal age and intrapartum interventions and adverse outcomes that indicate a need for obstetric or neonatal care in 'low risk' women; and to evaluate whether the relationship between maternal age and intrapartum interventions and adverse outcomes differs by planned place of birth.

## Methods

### Settings and participants

The study used data from the Birthplace in England national prospective cohort study which was designed to compare perinatal and maternal outcomes and interventions by planned place of birth at the start of care in labour.

The cohort study methods are described in full elsewhere.[25, 26] Briefly, the Birthplace cohort included a total of 79,774 births between April 2008 and April 2010, including 32,257 planned OU births from a stratified random sample of 36 OUs, 11,666 planned births in 53 freestanding midwifery units (FMUs), 17,582 planned births in 43 alongside midwifery units (AMUs) and 18,269 planned home births from 142 NHS trusts across England. Births were eligible for inclusion if the woman was planning a vaginal birth and received some labour care from an NHS midwife in her planned birth setting. Women who had an elective caesarean section or caesarean section before the onset of labour, presented in preterm labour (<37 weeks' gestation), had a multiple pregnancy, an unplanned home birth, or who were "unbooked" (received no antenatal care) were excluded. Stillbirths occurring before the start of care in labour were excluded. Women in the cohort were classified as 'low risk' if before the start of labour they were not known to have any of the medical or obstetric risk factors listed in national guidelines on intrapartum care[22] as "indicating increased risk suggesting planned birth in an obstetric unit". The study had a high response rate and low levels of missing data.[25, 26]

The study population for the analyses reported here was 'low risk' women in the Birthplace cohort aged 16 years or over at the time of birth, with a term (gestational age 37<sup>+0</sup> weeks to 42<sup>+0</sup> weeks inclusive) pregnancy and parity less than 6. In the NICE intrapartum care guideline individual assessment is recommended when planning place of birth for women with parity of 6 or more and many midwifery units restrict admission to women of parity 5 or less.[30] We additionally excluded women for whom age, parity or gestational age was not known.

Research ethics committee approval for the Birthplace study was obtained from the Berkshire Research Ethics Committee and did not require consent to be sought from participants as no personally identifiable data were collected.

### Data

As described elsewhere,[25] maternal characteristics, and medical or obstetric risk factors known prior to the onset of labour were extracted from the woman's medical records by the midwife

1 attending the birth. Complicating conditions identified by the midwife at the start of care in labour  
2 (for example prolonged rupture of membranes), intrapartum interventions and adverse maternal  
3 and perinatal outcomes were recorded by the attending midwife using a data collection form started  
4 during labour and completed on or after the fifth postnatal day.  
5  
6

7  
8 Planned place of birth (OU, AMU, FMU or home) was based on the intended place of birth at the  
9 start of care in labour. Women were included in the group in which they planned to give birth at the  
10 start of care in labour regardless of whether they were transferred during labour care or  
11 immediately after the birth.  
12  
13

## 14 **Outcomes**

15  
16 We focused on outcome measures that reflected interventions and adverse outcomes that indicated  
17 a need for obstetric and/or neonatal care, that is, outcomes that would require the woman and/or  
18 baby to be transferred to an obstetric or neonatal unit if labour care or birth took place elsewhere.  
19 For women, we considered the following outcomes both separately and as a combined maternal  
20 composite outcome ('interventions/adverse outcomes requiring obstetric care'): augmentation with  
21 syntocinon, instrumental delivery (ventouse or forceps), intrapartum caesarean section, general  
22 anaesthesia, maternal blood transfusion, 3<sup>rd</sup>/4<sup>th</sup> degree perineal tear, maternal admission for higher  
23 level care. The use of epidural/spinal analgesia was also considered as a secondary outcome. The  
24 main outcomes considered for women were the maternal composite outcome ('interventions and  
25 adverse outcomes requiring obstetric care'), augmentation, instrumental delivery, and intrapartum  
26 caesarean section.  
27  
28  
29  
30  
31  
32  
33  
34  
35  
36

37 For babies, we considered a single composite outcome measure largely reflecting admission to a  
38 neonatal unit. This 'perinatal composite outcome' encompassed one or more of the following  
39 events: admission to a neonatal unit within 48 hours of birth, stillbirth after the onset of labour or  
40 early neonatal death.  
41  
42  
43

## 44 **Statistical analysis**

45  
46 Analyses were conducted separately by parity. We modelled age at the time of delivery both as a  
47 categorical and continuous variable, using log Poisson regression to estimate relative risks adjusted  
48 for the following potential confounders: ethnic group, understanding of English, marital or partner  
49 status, body mass index (BMI), index of multiple deprivation (IMD) score, gestational age at birth  
50 and, where appropriate, planned place of birth (see supplementary Table S1 for categorisation). We  
51 also carried out sensitivity analyses in which we additionally adjusted for the presence of  
52  
53  
54  
55  
56  
57  
58  
59  
60

1 complicating conditions identified at the start of care in labour (none, one or more) and for the use  
2 of epidural/spinal analgesia.  
3

4 We fitted a series of models following a pre-specified, iterative strategy. In order to test our  
5 modelling assumptions regarding age and to determine whether it was appropriate to combine data  
6 for planned births in non-OU settings, we plotted outcomes by age and planned place of birth using  
7 polynomial smoothing.[31] Visual inspection of these plots (see Figure 1 [and 2](#) for the main  
8 outcomes) indicated that it was reasonable to model age as a continuous variable within the age  
9 range 16-40 (inclusive) and further indicated that event rates were generally similar in the three  
10 non-OU settings, suggesting that it was reasonable to combine the non-OU settings for the purposes  
11 of exploring interactions between maternal age and planned place of birth. We did not model age as  
12 a continuous variable above the age of 40 because data were sparse, particularly for planned non-  
13 OU births to nulliparous women, and we could not be confident that the broadly linear trends seen  
14 at younger ages could be extrapolated above this age.  
15  
16  
17  
18  
19  
20  
21  
22

23 We initially modelled the effect of age on study outcomes separately by parity and for all planned  
24 places of birth combined. Models in which age was modelled as a continuous variable were  
25 restricted to the age range 16-40 inclusive. For each of the study outcomes, we tested for an  
26 interaction between age (as a continuous variable) and planned place of birth (OU vs. non-OU) using  
27 a Wald test, and where the interaction was significant at the 5% level, we modelled the effect of age  
28 on the outcome separately by planned place of birth. [For outcomes where the interaction between  
29 age and planned place of birth was significant, we calculated crude and adjusted relative risks  
30 associated with planned non-OU birth separately for each age band.](#)  
31  
32  
33  
34  
35  
36  
37

38 In order to test whether the presence of complicating conditions at the start of care in labour (for  
39 example prolonged rupture of membranes) had an effect on the observed relationships, we fitted a  
40 further set of models in which we adjusted for both maternal characteristics and the presence of  
41 complicating conditions. Because previous analyses have shown that women planning birth in an OU  
42 have a higher prevalence of complicating conditions than in other settings[25] and this affects the  
43 magnitude of the difference in event rates between settings, we carried out further analyses of the  
44 main outcomes restricted to 'low risk' women without complicating conditions at the start of care in  
45 labour.  
46  
47  
48  
49  
50

51 Robust variance estimation was used to allow for the clustered nature of the data and, as described  
52 elsewhere,[25, 26] probability weights were incorporated to account for differences in the  
53 probability of a woman being selected for inclusion in the study arising from differences in each  
54 unit/trust's period of participation and the stratum specific probabilities of selection of OUs. The  
55  
56  
57  
58  
59  
60

1 weighting is such that, when applied to the pooled data for all four settings, the weighted event  
2 rates represent the estimated average event rates for England as a whole.  
3

4 For each outcome, we calculated the number of events, the number of births, the weighted  
5 incidence and ~~the unadjusted and adjusted relative risks, 95% confidence intervals.~~ We assessed  
6  
7 statistical significance at the 5% level.  
8  
9

10  
11  
12  
13  
14  
15  
16  
17  
18  
19  
20  
21  
22  
23  
24  
25  
26  
27  
28  
29  
30  
31  
32  
33  
34  
35  
36  
37  
38  
39  
40  
41  
42  
43  
44  
45  
46  
47  
48  
49  
50  
51  
52  
53  
54  
55  
56  
57  
58  
59  
60

For peer review only

## Results

### Description of the study sample

From the 79,774 women in the Birthplace cohort we excluded 15,553 women who had pre-existing ~~medical and obstetric~~ risk factors including 'NICE' medical and obstetric risk factors,[22] grand multiparity (parity 6 or over) and post-term pregnancy, 62 women who were aged <under 16, 682 women who had missing data on risk factors, parity or gestational age, and 106 whose age was missing. The study population consisted of 63,371 eligible 'low risk' women. The proportion (weighted) of women who were ineligible because of pre-existing ~~medical or obstetric~~ risk factors, increased from 31.9% in women aged 16-19 to 46.7% in women aged 40 and over.

Table 1 describes the characteristics of the sample by age. The percentages shown in the table are weighted so that they provide an estimate of the distribution of maternal characteristics that would apply to eligible 'low risk' births in England. Older women tended to be white, have a fluent understanding of English, and were more likely than younger women to live in a socioeconomically advantaged area. They were less likely than younger women to be nulliparous and more likely to have had multiple previous pregnancies. Planned home births were more common at older ages (Table 1 and supplementary Tables S2 and S3), particularly in multiparous women (supplementary Table S3). Older women were more likely to have complicating conditions, such as prolonged rupture of membranes, noted by the midwife at the start of care in labour (Table 1). Complicating conditions at start of care in labour were more common in nulliparous women (supplementary Tables S2 and S3).

[TABLE 1 HERE]

### Maternal interventions and adverse outcomes

Descriptive plots of outcomes by age indicated that the incidence of most outcomes tended to increase steadily with age in the age range 16 to 40, and that incidence rates were generally lower in planned non-OU births (Figure 1 and supplementary Figure S1). Rates for planned OU and non-OU births tended to diverge above this age range, but rates were based on small numbers of older women (supplementary Table S4) particularly for planned AMU and FMU births and therefore these rates have wide confidence intervals.

For nulliparous women in the age range 16-40 (all PPOBs combined), the adjusted risk of having an intervention/ adverse outcome requiring obstetric care (maternal composite) increased significantly with age, as did the risk of augmentation with syntocinon, instrumental delivery, intrapartum

1 caesarean section, 3<sup>rd</sup>/4<sup>th</sup> degree perineal tear, or maternal admission for higher level care (Table 2).  
2 For augmentation with syntocinon and the maternal composite outcome, the effect of age differed  
3 by PPOB (Table 2). The risk of augmentation increased more steeply with age in non-OU settings (RR  
4 1.23, 95% CI 1.18-1.28 for every 5-year increase in age in planned non-OU births vs. 1.12, 95% CI  
5 1.07-1.17 for planned OU births). Nevertheless, the proportion of women receiving augmentation  
6 was lower in planned non-OU births at all ages (Table 3). For example, 42.2% (95% CI 36.4%-48.1%)  
7 of nulliparous women aged 35-39 who planned birth in an OU received augmentation with  
8 syntocinon compared with 22.6% (95% CI 19.8%-25.7%) of nulliparous women of the same age who  
9 planned birth in a non-OU setting. A similar pattern was observed for the maternal composite  
10 outcome: the risk of an intervention/adverse outcome requiring obstetric care (maternal composite)  
11 increased slightly more steeply with age in the non-OU settings (RR 1.21, 95% CI 1.18-1.25 for every  
12 5-year increase in age in planned non-OU births vs. 1.12, 95% CI 1.10-1.15 for planned OU births) but  
13 the absolute risk was lower in the planned non-OU birth at all ages (Table 3). For example, 65.5%  
14 (95% CI 61.8%-69.1%) of nulliparous women aged 35-39 who planned birth in an OU experienced an  
15 intervention/adverse outcome requiring obstetric care compared with 39.9% (95% CI 36.0%-43.9%)  
16 of nulliparous women of the same age who planned birth in a non-OU setting.

17  
18  
19  
20  
21  
22  
23  
24  
25  
26  
27 ~~[TABLE 2 AND TABLE 3 HERE]~~

28  
29  
30 In nulliparous women, the risk of instrumental delivery and intrapartum caesarean section increased  
31 significantly with age (RR 1.18, 95% CI 1.12-1.25 and RR 1.27, 95% CI 1.23-1.32) across all settings.

32  
33 Again, absolute risks were substantially lower in planned non-OU births (Table 3).

34  
35  
36 ~~[TABLE 2 AND TABLE 3 HERE]~~

37  
38  
39  
40  
41 Similar patterns were observed when we adjusted for complicating conditions at the start of care in  
42 labour in order to take account of difference between settings in complicating conditions at the start  
43 of care in labour (23.9% in nulliparous planned OU births vs. 8.6% in nulliparous planned-non-OU  
44 births) (supplementary Table S5).

45  
46  
47  
48 However, although the risk of intervention increased with age, at all ages, nulliparous women who  
49 planned birth in a non-OU setting had a significantly reduced risk of receiving augmentation or of  
50 experiencing an intervention/adverse outcome requiring obstetric care. Table 4 shows the adjusted  
51 risks by age for the two outcomes (maternal composite and augmentation) where the effect of  
52 planned place of birth differed by age.



1 [\[TABLE 4 HERE\]](#)

2  
3 For multiparous women aged 16-40 (all PPOBs combined), the combined risk of having an  
4 intervention or adverse outcome requiring obstetric care (maternal composite) or of instrumental  
5 delivery, intrapartum caesarean section, and maternal admission for higher level care increased with  
6 age (Table 2). Augmentation with syntocinon, general anaesthesia, blood transfusion, and 3<sup>rd</sup>/4<sup>th</sup>  
7 degree perineal tear were not associated with maternal age in multiparous women (Table 2). For all  
8 of the outcomes considered, the effect of age did not differ by PPOB in multiparous women (Table  
9 2). Again, for the maternal composite outcome, augmentation with syntocinon, instrumental  
10 delivery, intrapartum caesarean section, the absolute event rates were lower in planned non-OU  
11 births in most age categories (Table [45](#)). For example, 9.8% (95% CI 8.2%-11.6%) of multiparous  
12 women aged 35-39 who planned birth in an OU received augmentation with syntocinon compared  
13 with 1.8% (95% CI 1.3%-2.5%) of women of the same age who planned birth in a non-OU setting.  
14  
15

16  
17  
18  
19  
20  
21  
22 Up to age 40, other less common outcomes did not increase significantly with maternal age in  
23 nulliparous or multiparous women with the exception of maternal admission to higher level care  
24 (Table 2 and supplementary Tables [S5-S6](#) and [S6S7](#)).  
25  
26

27  
28 [\[TABLE 4.5 HERE\]](#)

29  
30 ~~Adjustment for complicating conditions at the start of care in labour had a negligible effect on the~~  
31 ~~relationship between age and the study outcomes (supplementary Table S7).~~ Absolute event rates  
32 for the main outcomes (maternal composite, augmentation with syntocinon, instrumental delivery,  
33 intrapartum caesarean section and perinatal composite) were reduced when the analysis was  
34 restricted to women without complicating conditions identified at start of labour care  
35 ~~(supplementary Tables S8 and S9). However, at all ages, nulliparous women without complicating~~  
36 ~~conditions who planned birth in a non-OU setting had a significantly reduced risk of experiencing an~~  
37 ~~intervention/adverse outcome requiring obstetric care (maternal composite outcome) (Table S8 and~~  
38 ~~S10). but absolute intervention rates remained substantially higher at all ages in planned OU births~~  
39 ~~vs. planned births in other settings (supplementary Tables S8 and S9).~~ For example, 38.0% (95% CI  
40 34.3%-41.9%) of nulliparous women aged 35-39 without complicating complications who planned  
41 birth in a non-OU setting experienced an intervention/adverse outcome requiring obstetric care,  
42 compared with 57.7% (95% CI 53.4%- 62.0%) of women of the same age without complicating  
43 conditions who planned birth in an OU.  
44  
45  
46  
47  
48  
49  
50  
51  
52

53  
54 The use of epidural/spinal analgesia increased significantly with maternal age and lower rates of use  
55 were observed in planned non-OU births (supplementary Figure S2). Adjustment for use of epidural  
56 in the multivariable models attenuated but did not change the results materially (data not shown).  
57  
58  
59  
60

## Perinatal outcome

The perinatal composite outcome (admission to a neonatal unit within 48 hours of birth, stillbirth after the onset of labour or early neonatal death) showed a modest but not statistically significant increase with age in nulliparous women in the age range 16-40 (Table 2). The risk increased significantly in nulliparous women aged 40+ compared with women aged 25-29 (RR 2.29, 95%CI 1.28-4.09, adjusted for maternal characteristics and planned place of birth, all settings combined). Maternal age was not significantly associated with the risk of the perinatal composite outcome in multiparous women in the age range 16-40 (Table 2) and the risk was not significantly increased in births to multiparous women aged 40+ compared with women aged 25-29 (RR 1.21, 95% CI 0.60-2.43, adjustment as before). Absolute event rates are shown in Table [56](#).

[TABLE [56](#) HERE]

## Discussion

### Principal findings

In women without known medical or obstetric risk factors prior to the onset of labour, interventions and adverse maternal outcomes requiring obstetric care generally increased with age, but there was no age at which there was a step-change in risk. For both nulliparous and multiparous women, maternal intervention rates were lower in births planned in non-OU settings compared with planned OU births ~~at all ages.~~ ~~but for~~ For nulliparous women the overall risk of experiencing an intervention or adverse outcome requiring obstetric care, and in particular of augmentation with syntocinon, increased more steeply with age in planned non-OU births than in planned OU births. As a consequence, although nulliparous women of all ages who planned birth in a non-OU setting had a significantly reduced risk of experiencing an intervention or adverse outcome requiring obstetric care, the benefit of planned non-OU birth was greatest at younger ages ~~and reduced with increasing age.~~

In low risk women up to the age of 40, the risk of neonatal unit admission or intrapartum stillbirth/early neonatal death did not show a statistically significant upward trend with age in either nulliparous or multiparous women. In planned OU births, the risk of neonatal unit admission or perinatal death was significantly higher in nulliparous women aged 40+ relative to women aged 25-29.

### Strengths and limitations

A strength of the study is that we were able to evaluate the effect of age on intrapartum outcomes by planned birth setting in a nationally representative sample of 'low risk' women. In order to strengthen the evidence supporting clinical guidelines on planned place of birth, the study specifically focused on outcomes that reflect need for obstetric or neonatal care in a sample of women who meet the current criteria for planned birth in a non-OU setting.[22] To our knowledge, this is the first study to investigate the effect of increasing maternal age in different birth settings with a focus on outcomes that would require transfer to an OU and hence may affect the choice of planned place of birth.

Despite the large overall sample size, the number of older women was relatively small, so we had limited ability to explore effects above age 40 or to separate results of individual non-OU birth settings. We combined data for the non-OU settings, having first explored the data to check that this was reasonable. This increased our statistical power to evaluate the association between maternal age and the study outcomes (maternal and perinatal), but we still lacked the statistical power to

1 evaluate uncommon outcomes. It is important to note that previous analyses[25] have shown that  
2 planned home births are associated with a significantly increased risk of adverse perinatal outcomes  
3 in nulliparous women.  
4

5  
6 The risk of bias due to missing data and non-response was low: the study had a low level of missing  
7 data, a high response rate[25, 26] and, because consent was not required, there was no self-  
8 selection bias due to non-consent. We addressed potential differences in risk between groups in a  
9 number of ways. First, we ~~We~~ controlled for important potential confounders such as body mass  
10 index. ~~Second, we and, because the study~~ focused on a relatively homogeneous population of  
11 women without known medical or obstetric risk factors prior to the onset of labour. Third, because  
12 previous analyses[25] identified that the prevalence of complicating conditions at the start of care in  
13 labour was higher in the planned OU birth group, we conducted two additional analyses in which we  
14 controlled for complicating conditions and restricted the analysis to women without complicating  
15 conditions. ~~uncontrolled~~ Differences in the clinical characteristics of the OU and non-OU ~~in clinical~~  
16 ~~risks between~~ groups therefore seem unlikely to explain ~~our findings. the age related trends~~  
17 observed or the significant reductions in risks observed in non-OU births. Nevertheless, women self-  
18 select their birth setting and it may be that some of the differences in outcomes that we observed  
19 between settings may have been due to unmeasured differences in the characteristics of women  
20 opting for OU and non-OU births, rather than to differences attributable to the birth setting.  
21  
22  
23  
24  
25  
26  
27  
28  
29  
30  
31

### 32 **Comparison with the existing literature**

33  
34 Older women have been shown to have an increased risk of intrapartum intervention,[6, 32] but  
35 many studies include women known to be at higher risk who would normally be advised to give birth  
36 in an obstetric unit. Evidence relating to 'low risk' women[17] or from studies that have controlled  
37 for pre-existing risk factors or complications[33] is more limited but is generally consistent with our  
38 finding that intervention rates increase with age in 'low risk' women.  
39  
40  
41  
42

43 There is extensive evidence that 'low risk' women who plan birth in a non-OU setting have a reduced  
44 risk of a range of intrapartum interventions, including augmentation, instrumental delivery and  
45 intrapartum caesarean section, and are more likely to have a spontaneous vaginal birth.[22-24, 27,  
46 28] Our study found that, across the age range 16-40, women who plan birth in a non-OU setting  
47 experience substantially lower intervention rates and are less likely to experience an outcome  
48 requiring obstetric care than women of the same age who plan birth in an obstetric unit.  
49  
50  
51  
52

53  
54 In nulliparous women we found that rates of augmentation of labour with syntocinon increased  
55 more steeply with maternal age in planned non-OU births compared with planned OU births,  
56 although absolute rates of augmentation were substantially lower in planned non-OU births at all  
57  
58  
59  
60

1 | ages. An age-related increase in augmentation is consistent with evidence of poorer uterine function  
2 | at older ages,[34] longer labours[34] and an increased incidence of prolonged labour,[35, 36] but the  
3 | reasons for a steeper increase in augmentation with age in non-OU settings is unclear. It has been  
4 | suggested that labelling of older women as 'higher risk' and/or heightened concern about the safety  
5 | of older nulliparous women, particularly those who have required fertility treatment, may result in  
6 | increased rates of caesarean section for non-medical reasons,[20, 32, 33, 37] and it is possible that  
7 | similar factors affect midwives' decision making regarding transfer for failure to progress, or for  
8 | other reasons. Intrapartum transfers from midwifery units in the Birthplace study have been shown  
9 | to increase significantly with age in nulliparous women[29] and, once transferred, women are  
10 | 'exposed' to the higher intervention rates found in obstetric units.

11 |  
12 | It is also possible that age-related differences in women's expectations and expressed preferences  
13 | may contribute to the pattern of intervention observed in our study. Older nulliparous women have  
14 | been found to have a more positive attitude towards caesarean section,[38] for example, and also to  
15 | have a higher perception of pregnancy risk, even in older women without known risk factors.[39]  
16 | The significant positive association between maternal age and epidural use observed in our study  
17 | (seen most strongly in nulliparous women planning a non-OU birth), would be consistent with a  
18 | greater willingness of older women to consider interventions.

19 |  
20 | We found a significantly increased risk of maternal admission to higher level care at older ages in  
21 | both nulliparous and multiparous women. The number of events was small and this could be a  
22 | chance finding but an increase in serious obstetric complications at older ages observed in some  
23 | studies[3, 6, 12] cannot be ruled out.

24 |  
25 | Although studies including women with known risk factors have reported increased risks in women  
26 | aged over 35,[3, 6, 35] our analysis shows that up to the age of 40, risks tend to increase in a broadly  
27 | linear manner in healthy women with straightforward pregnancies, with no evidence of a step-  
28 | change in risk below the age of 40. Other studies have similarly concluded that the association of  
29 | adverse outcomes with maternal age is a continuum,[3] with the increase in adverse perinatal  
30 | outcomes possibly gaining momentum above the age of 40.[40] Because of the small number of  
31 | births to mothers aged over 40 in our sample we had limited power to evaluate risks at older ages  
32 | and other evidence relating to older 'low risk' women is sparse.[21]

33 |  
34 | There is some evidence that the babies of older women are at increased risk of serious adverse  
35 | outcomes, including intrapartum-related perinatal death,[14] early neonatal death[15] and neonatal  
36 | unit admission,[5, 33] but these outcomes would be expected to be substantially reduced in 'low  
37 | risk' women who, by definition, do not have medical or obstetric risk factors such as severe obesity,

1 diabetes or previous caesarean section. Furthermore, the poorer outcomes associated with the  
2 increased risk of pre-term birth at older ages do not apply to women giving birth at term. In our 'low  
3 risk' cohort, we did not observe a significant increase with age in our composite measure of neonatal  
4 unit admission/perinatal death within the age range 16-40, but graphical plots for nulliparous  
5 women suggested a possible upturn in neonatal unit admission/perinatal death around the age of 40  
6 in nulliparous women. Further research evaluating perinatal outcomes in 'low risk' women aged over  
7 40 is needed.

### 12 **Conclusions and policy implications**

15 The incidence of intrapartum interventions and adverse outcomes requiring obstetric care increases  
16 with maternal age, but at all ages 'low risk' women who plan birth in a non-obstetric unit setting  
17 tend to experience lower intervention rates than comparable women who plan birth in an OU.

20 ~~Amongst younger nulliparous women, younger women~~ appear to benefit more ~~than older~~  
21 ~~nulliparous women~~ from the reduction in interventions associated with planned birth in a non-OU  
22 setting. Increased intervention rates at older ages may partly reflect women's expectations and  
23 preferences and possibly 'higher risk' labelling by clinicians.

27 ~~The findings support the current threshold of age 40 for recommending individual assessment when~~  
28 ~~planning place of birth. Healthy older nulliparous women with straightforward pregnancies~~  
29 ~~All~~  
30 women, irrespective of age and parity, should be given information about the risks and benefits of  
31 different birth settings. Nulliparous women planning birth in non-OU setting should be informed that  
32 ~~they have an increased risk of~~ the risk of interventions that require transfer to an OU increases with  
33 age. Further research is required to evaluate adverse perinatal outcomes in 'low risk' women aged  
34 over 40.

## Acknowledgements

We thank Xiaosi Wang for conducting initial literature searches and statistical analysis.

## Competing interests

None.

## Contribution to authorship

JH conceived and developed the study outline with input from PB; YL developed the protocol and analysis plan with input from JH, JT and MK; YL conducted the analysis; JT provided statistical advice; YL and JH drafted the manuscript with input from RR, MK and PB. All authors were involved in interpretation of data, review and revision of the draft manuscript and approval of the final version.

## Ethics Approval

Research ethics committee approval for the Birthplace study was obtained from the Berkshire Research Ethics Committee (MREC ref 07/H0505/151).

## Funding

This paper reports on an independent study which is funded by the Policy Research Programme in the Department of Health. The views expressed are not necessarily those of the Department.

Birthplace combines the Evaluation of Maternity Units in England study funded in 2006 by the National Institute for Health Research Service Delivery and Organisation (NIHR SDO) programme, and the Birth at Home in England study funded in 2007 by the Department of Health Policy Research Programme (DH PRP). From January 2012, the NIHR SDO programme merged with the NIHR Health Services Research programme to establish the new NIHR health Services and Delivery Research (NIHR HS&DR) programme. The views and opinions expressed by the authors do not necessarily reflect those of the HS&DR Programme, NIHR, NHS, DH PRP or the Department of Health.

## References

1. Office for National Statistics. Live Births in England and Wales by Characteristics of Mother 1, 2011. November 2013. Available from: [http://www.ons.gov.uk/ons/dcp171778\\_296157.pdf](http://www.ons.gov.uk/ons/dcp171778_296157.pdf).
2. Martin JA, Hamilton BE, Ventura SJ, et al. Births: final data for 2009. *Natl Vital Stat Rep*. 2011;**60**(1):1-70. doi:
3. Biro MA, Davey M-A, Carolan M, et al. Advanced maternal age and obstetric morbidity for women giving birth in Victoria, Australia: A population-based study. *Aust N Z J Obstet Gynaecol*. 2012;**52**(3):229-34. doi: 10.1111/j.1479-828X.2012.01427.x
4. Carolan M. Maternal age  $\geq 45$  years and maternal and perinatal outcomes: A review of the evidence. *Midwifery*. 2013;**29**(5):479-89. doi: 10.1016/j.midw.2012.04.001
5. Delbaere I, Verstraelen H, Goetgeluk S, et al. Pregnancy outcome in primiparae of advanced maternal age. *European Journal of Obstetrics & Gynecology and Reproductive Biology*. 2007;**135**(1):41-6. doi: 10.1016/j.ejogrb.2006.10.030
6. Jolly M, Sebire N, Harris J, et al. The risks associated with pregnancy in women aged 35 years or older. *Hum Reprod*. 2000;**15**(11):2433-7. doi: 10.1093/humrep/15.11.2433
7. Ananth CV, Demissie K, Smulian JC, et al. Placenta previa in singleton and twin births in the United States, 1989 through 1998: A comparison of risk factor profiles and associated conditions. *Am J Obstet Gynecol*. 2003;**188**(1):275-81. doi: 10.1067/mob.2003.10
8. Ananth CV, Wilcox AJ, Savitz DA, et al. Effect of maternal age and parity on the risk of uteroplacental bleeding disorders in pregnancy. *Obstet Gynecol*. 1996;**88**(4, Part 1):511-6. doi: 10.1016/0029-7844(96)00236-0
9. Faiz AS, Ananth CV. Etiology and risk factors for placenta previa: an overview and meta-analysis of observational studies. *Journal of Maternal-Fetal and Neonatal Medicine*. 2003;**13**(3):175-90. doi: 10.1080/jmf.13.3.175.190
10. Jacobsson B, Ladfors L, Milsom I. Advanced Maternal Age and Adverse Perinatal Outcome. *Obstet Gynecol*. 2004;**104**(4):727-33. doi: 10.1097/01.AOG.0000140682.63746.be. doi: 10.1097/01.AOG.0000140682.63746.be



- 1 11. Roos N, Sahlin L, Ekman-Ordeberg G, et al. Maternal risk factors for postterm pregnancy and  
2 cesarean delivery following labor induction. *Acta Obstet Gynecol Scand*. 2010;**89**(8):1003-10. doi:  
3 10.3109/00016349.2010.500009
- 4  
5  
6 12. Knight M, Kurinczuk JJ, Spark P, et al. Inequalities in maternal health: national cohort study  
7 of ethnic variation in severe maternal morbidities. *BMJ*. 2009;**338**:b542. doi: 10.1136/bmj.b542
- 8  
9  
10 13. Huang L, Sauve R, Birkett N, et al. Maternal age and risk of stillbirth: a systematic review.  
11 *Can Med Assoc J*. 2008;**178**(2):165-72. doi: 10.1503/cmaj.070150
- 12  
13  
14 14. Pasupathy D, Wood AM, Pell JP, et al. Advanced maternal age and the risk of perinatal death  
15 due to intrapartum anoxia at term. *J Epidemiol Community Health*. 2011;**65**(3):241-5. doi:  
16 10.1136/jech.2009.097170
- 17  
18  
19 15. Gilbert WM, Nesbitt TS, Danielsen B. Childbearing Beyond Age 40: Pregnancy Outcome in  
20 24,032 Cases. *Obstet Gynecol*. 1999;**93**(1):9-14. doi:  
21  
22  
23 16. Ezra Y, McParland P, Farine D. High delivery intervention rates in nulliparous women over  
24 age 35. *European Journal of Obstetrics & Gynecology and Reproductive Biology*. 1995;**62**(2):203-7.  
25 doi: [http://dx.doi.org/10.1016/0301-2115\(95\)02201-H](http://dx.doi.org/10.1016/0301-2115(95)02201-H)
- 26  
27  
28 17. Gordon D, Milberg J, Daling J, et al. Advanced Maternal Age As a Risk Factor for Cesarean  
29 Delivery. *Obstet Gynecol*. 1991;**77**(4):493-7. doi:  
30  
31  
32 18. Heffner LJ, Elkin E, Fretts RC. Impact of labor induction, gestational age, and maternal age on  
33 cesarean delivery rates. *Obstet Gynecol*. 2003;**102**(2):287-93. doi: 10.1016/S0029-7844(03)00531-3
- 34  
35  
36 19. Patel RR, Peters TJ, Murphy DJ, et al. Prenatal risk factors for Caesarean section. Analyses of  
37 the ALSPAC cohort of 12 944 women in England. *Int J Epidemiol*. 2005;**34**(2):353-67. doi:  
38 10.1093/ije/dyh401
- 39  
40  
41 20. Peipert JF, Bracken MB. Maternal Age: An Independent Risk Factor for Cesarean Delivery.  
42 *Obstet Gynecol*. 1993;**81**(2):200-5. doi:  
43  
44  
45 21. Carolan M. The Graying of the Obstetric Population: Implications for the Older Mother. *J*  
46 *Obstet Gynecol Neonatal Nurs*. 2003;**32**(1):19-27. doi: 10.1177/0884217502239797
- 47  
48  
49 22. National Collaborating Centre for Women's and Children's Health. Intrapartum care of  
50 healthy women and their babies during childbirth. Commissioned by the National Institute for Health  
51 and Clinical Excellence (NICE). London: RCOG press; 2007.
- 52  
53  
54  
55  
56  
57  
58  
59  
60

- 1 23. Hodnett ED, Downe S, Walsh D. Alternative versus conventional institutional settings for  
2 birth. *The Cochrane database of systematic reviews*. 2012;**8**:CD000012. doi:  
3 10.1002/14651858.CD000012.pub4  
4  
5  
6 24. Walsh D, Downe SM. Outcomes of free-standing, midwife-led birth centers: a structured  
7 review. *Birth*. 2004;**31**(3):222-9. doi: 10.1111/j.0730-7659.2004.00309.x  
8  
9  
10 25. Birthplace in England Collaborative Group. Perinatal and maternal outcomes by planned  
11 place of birth for healthy women with low risk pregnancies: the Birthplace in England national  
12 prospective cohort study. *BMJ*. 2011;**343**:d7400. doi: 10.1136/bmj.d7400  
13  
14  
15 26. Hollowell J, Puddicombe D, Rowe R, et al. The Birthplace national prospective cohort study:  
16 perinatal and maternal outcomes by planned place of birth. Birthplace in England research  
17 programme. Final report part 4. NIHR Service Delivery and Organisation programme, 2011.  
18  
19  
20 27. Lindgren HE, Radestad IJ, Christensson K, et al. Outcome of planned home births compared  
21 to hospital births in Sweden between 1992 and 2004. A population-based register study. *Acta Obstet*  
22 *Gynecol Scand*. 2008;**87**(7):751-9. doi: 10.1080/00016340802199903  
23  
24  
25 28. Janssen PA, Saxell L, Page LA, et al. Outcomes of planned home birth with registered midwife  
26 versus planned hospital birth with midwife or physician. *CMAJ*. 2009;**181**(6-7):377-83. doi:  
27 10.1503/cmaj.081869  
28  
29  
30 29. Rowe RE, Fitzpatrick R, Hollowell J, et al. Transfers of women planning birth in midwifery  
31 units: data from the Birthplace prospective cohort study. *BJOG*. 2012;**119**(9):1081-90. doi:  
32 10.1111/j.1471-0528.2012.03414.x  
33  
34  
35 30. Redshaw M, Rowe R, Schroeder L, et al. Mapping maternity care. The configuration of  
36 maternity care in England. Birthplace in England research programme. Final report part 3. NIHR  
37 Service Delivery and Organisation programme;, 2011.  
38  
39  
40 31. Fan J, Gijbels I. Local Polynomial Modelling and Its Applications. London: Chapman & Hall;  
41 1996.  
42  
43  
44 32. Bayrampour H, Heaman M. Advanced Maternal Age and the Risk of Cesarean Birth: A  
45 Systematic Review. *Birth*. 2010;**37**(3):219-26. doi: 10.1111/j.1523-536X.2010.00409.x  
46  
47  
48  
49 33. Bell JS, Campbell DM, Graham WJ, et al. Can obstetric complications explain the high levels  
50 of obstetric interventions and maternity service use among older women? A retrospective analysis  
51 of routinely collected data. *BJOG*. 2001;**108**(9):910-8. doi: 10.1111/j.1471-0528.2001.00214.x  
52  
53  
54  
55  
56  
57  
58  
59  
60

- 1  
2  
3  
4  
5  
6  
7  
8  
9  
10  
11  
12  
13  
14  
15  
16  
17  
18  
19  
20  
21  
22  
23  
24  
25  
26  
27  
28  
29  
30  
31  
32  
33  
34  
35  
36  
37  
38  
39  
40  
41  
42  
43  
44  
45  
46  
47  
48  
49  
50  
51  
52  
53  
54  
55  
56  
57  
58  
59  
60
34. Main DM, Main EK, Moore li DH. The relationship between maternal age and uterine dysfunction: A continuous effect throughout reproductive life. *Am J Obstet Gynecol*. 2000;**182**(6):1312-20. doi: 10.1067/mob.2000.106249
35. Berkowitz GS, Skovron ML, Lapinski RH, et al. Delayed Childbearing and the Outcome of Pregnancy. *N Engl J Med*. 1990;**322**(10):659-64. doi: 10.1056/NEJM199003083221004
36. Greenberg MB, Cheng YW, Sullivan M, et al. Does length of labor vary by maternal age? *Am J Obstet Gynecol*. 2007;**197**(4):428.e1-.e7. doi: 10.1016/j.ajog.2007.06.058
37. Cnattingius R, Cnattingius S, Notzon FC. Obstacles to reducing cesarean rates in a low-cesarean setting: the effect of maternal age, height, and weight. *Obstet Gynecol*. 1998;**92**(4, Part 1):501-6. doi: 10.1016/s0029-7844(98)00244-0
38. Aasheim V, Waldenstrom U, Rasmussen S, et al. Experience of childbirth in first-time mothers of advanced age - a Norwegian population-based study. *BMC Pregnancy Childbirth*. 2013;**13**:53. doi: 10.1186/1471-2393-13-53
39. Bayrampour H, Heaman M, Duncan KA, et al. Comparison of Perception of Pregnancy Risk of Nulliparous Women of Advanced Maternal Age and Younger Age. *Journal of Midwifery & Women's Health*. 2012;**57**(5):445-53. doi: 10.1111/j.1542-2011.2012.00188.x
40. Carolan M, Frankowska D. Advanced maternal age and adverse perinatal outcome: A review of the evidence. *Midwifery*. 2011;**27**(6):793-801. doi: 10.1016/j.midw.2010.07.006

1  
2  
3  
4  
5  
6  
7  
8  
9  
10  
11  
12  
13  
14  
15  
16  
17  
18  
19  
20  
21  
22  
23  
24  
25  
26  
27  
28  
29  
30  
31  
32  
33  
34  
35  
36  
37  
38  
39  
40  
41  
42  
43  
44  
45  
46  
47  
48  
49  
50  
51  
52  
53  
54  
55  
56  
57  
58  
59  
60



(a) Maternal composite, nulliparous women



(e) Maternal composite, multiparous women



(b) Augmentation, nulliparous women



(f) Augmentation, multiparous women

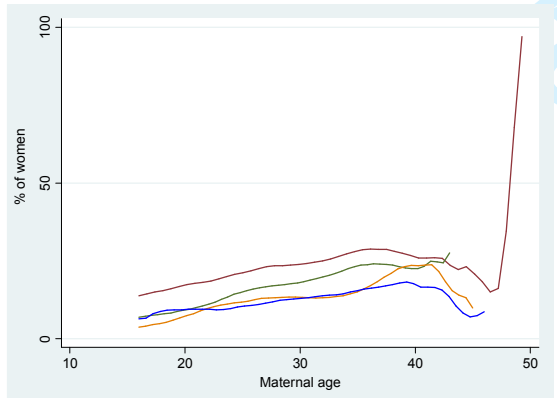

(c) Instrumental delivery, nulliparous women

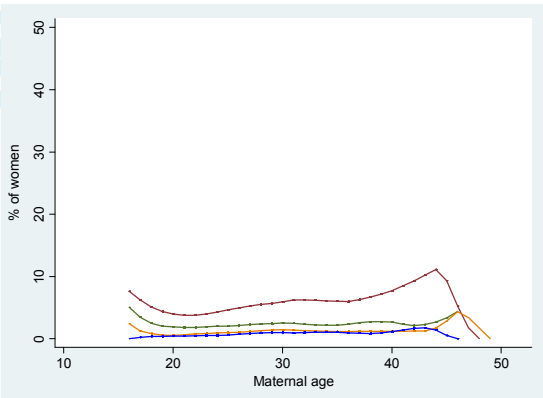

(g) Instrumental delivery, multiparous women

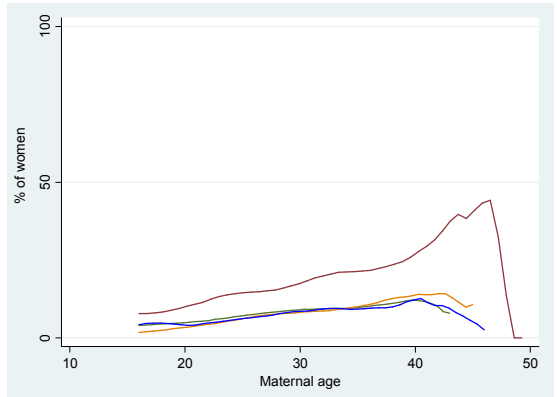

(d) Intrapartum caesarean section, nulliparous

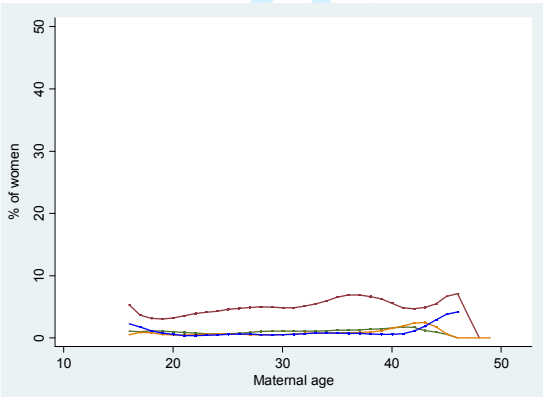

(h) Intrapartum caesarean section, multiparous

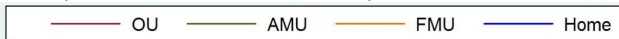

1 **Figure 1 Association between maternal age and intrapartum interventions and adverse maternal outcomes**  
2 **in low risk women aged 16 and over<sup>1</sup>**

3 <sup>1</sup> NOTE THAT scales for nulliparous women and multiparous women are different.  
4  
5  
6  
7  
8  
9  
10  
11  
12  
13  
14  
15  
16  
17  
18  
19  
20  
21  
22  
23  
24  
25  
26  
27  
28  
29  
30  
31  
32  
33  
34  
35  
36  
37  
38  
39  
40  
41  
42  
43  
44  
45  
46  
47  
48  
49  
50  
51  
52  
53  
54  
55  
56  
57  
58  
59  
60

For peer review only



(a) Perinatal composite, nulliparous women

(b) Perinatal composite, multiparous women



Figure 2 Association between maternal age and perinatal composite outcome in low risk women aged 16 and over

1  
2  
3  
4  
5  
6  
7  
8  
9  
10  
11  
12  
13  
14  
15  
16  
17  
18  
19  
20  
21  
22  
23  
24  
25  
26  
27  
28  
29  
30  
31  
32  
33  
34  
35  
36  
37  
38  
39  
40  
41  
42  
43  
44  
45  
46  
47  
48  
49  
50  
51  
52  
53  
54  
55  
56  
57  
58  
59  
60

**Table 1 Characteristics of low risk women aged 16 and over by maternal age category**

|                                            | 16 - 19 years |                | 20 - 24 years |                | 25 - 29 years |                | 30 - 34 years |                | 35 - 39 years |                | ≥ 40 years |                |
|--------------------------------------------|---------------|----------------|---------------|----------------|---------------|----------------|---------------|----------------|---------------|----------------|------------|----------------|
|                                            | n=3354        |                | n=11395       |                | n=18091       |                | n=18453       |                | n=10397       |                | n=1681     |                |
|                                            | n             | % <sup>1</sup> | n          | % <sup>1</sup> |
| <b>Ethnic group</b>                        |               |                |               |                |               |                |               |                |               |                |            |                |
| White                                      | 3078          | 90.1           | 9685          | 81.2           | 15146         | 77.5           | 16052         | 80.7           | 9339          | 84.3           | 1527       | 86.6           |
| Non-white                                  | 275           | 9.9            | 1697          | 18.8           | 2920          | 22.5           | 2375          | 19.3           | 1044          | 15.8           | 153        | 13.4           |
| Missing                                    | 1             |                | 13            |                | 25            |                | 26            |                | 14            |                | 1          |                |
| <b>Understanding of English</b>            |               |                |               |                |               |                |               |                |               |                |            |                |
| Fluent                                     | 3254          | 96.7           | 10394         | 89.6           | 16757         | 90.0           | 17605         | 92.9           | 10155         | 96.3           | 1638       | 96.7           |
| Not fluent                                 | 94            | 3.3            | 948           | 10.4           | 1251          | 10.0           | 776           | 7.1            | 214           | 3.7            | 36         | 3.4            |
| Missing                                    | 6             |                | 53            |                | 83            |                | 72            |                | 28            |                | 7          |                |
| <b>Marital/partner status</b>              |               |                |               |                |               |                |               |                |               |                |            |                |
| Married/living with partner                | 1836          | 51.9           | 9550          | 81.8           | 16868         | 92.1           | 17782         | 96.1           | 10004         | 95.4           | 1591       | 94.4           |
| Single/unsupported by partner              | 1440          | 48.1           | 1677          | 18.2           | 1010          | 7.9            | 493           | 3.9            | 293           | 4.7            | 68         | 5.7            |
| Missing                                    | 78            |                | 168           |                | 213           |                | 178           |                | 100           |                | 22         |                |
| <b>BMI in pregnancy (kg/m<sup>2</sup>)</b> |               |                |               |                |               |                |               |                |               |                |            |                |
| < 18.5                                     | 184           | 6.2            | 426           | 4.2            | 413           | 2.6            | 337           | 2.1            | 156           | 1.5            | 18         | 0.2            |
| 18.5 - 24.9                                | 1753          | 50.3           | 5316          | 45.6           | 8560          | 45.9           | 9059          | 46.7           | 4864          | 44.5           | 802        | 46.4           |
| 25.0 - 29.9                                | 598           | 17.9           | 2558          | 21.7           | 4341          | 24.6           | 4206          | 23.2           | 2572          | 26.9           | 415        | 27.6           |
| 30.0 - 35.0                                | 233           | 7.6            | 1096          | 10.0           | 1627          | 9.3            | 1399          | 8.8            | 769           | 8.9            | 109        | 8.1            |
| Not recorded                               | 581           | 18.1           | 1969          | 18.4           | 3091          | 17.6           | 3389          | 19.2           | 2000          | 18.3           | 329        | 17.7           |
| Missing                                    | 5             |                | 30            |                | 59            |                | 63            |                | 36            |                | 8          |                |
| <b>IMD quintile</b>                        |               |                |               |                |               |                |               |                |               |                |            |                |
| 1 <sup>st</sup> (Least deprived)           | 245           | 6.8            | 1102          | 8.5            | 2875          | 13.8           | 4255          | 20.5           | 2783          | 24.6           | 434        | 26.0           |
| 2 <sup>nd</sup>                            | 405           | 12.3           | 1521          | 13.3           | 3259          | 17.5           | 4114          | 21.7           | 2434          | 22.3           | 396        | 22.0           |
| 3 <sup>rd</sup>                            | 637           | 18.2           | 2115          | 18.0           | 3657          | 18.6           | 3759          | 19.7           | 2135          | 20.0           | 357        | 21.6           |
| 4 <sup>th</sup>                            | 827           | 25.3           | 2784          | 23.9           | 3957          | 22.7           | 3479          | 19.8           | 1765          | 17.9           | 291        | 16.9           |
| 5 <sup>th</sup> (Most deprived)            | 1221          | 37.5           | 3821          | 36.2           | 4262          | 27.5           | 2759          | 18.4           | 1215          | 15.2           | 197        | 13.7           |
| Missing                                    | 19            |                | 52            |                | 81            |                | 87            |                | 65            |                | 6          |                |
| <b>Previous pregnancies ≥ 24 weeks</b>     |               |                |               |                |               |                |               |                |               |                |            |                |
| 0                                          | 2835          | 86.8           | 6341          | 62.0           | 8438          | 53.6           | 7307          | 46.7           | 2989          | 36.9           | 346        | 28.0           |

|                                                                          |      |      |      |      |      |      |      |      |      |      |     |      |
|--------------------------------------------------------------------------|------|------|------|------|------|------|------|------|------|------|-----|------|
| 1                                                                        | 474  | 12.1 | 3772 | 29.4 | 5892 | 29.9 | 6963 | 33.9 | 3929 | 35.5 | 540 | 32.3 |
| 2                                                                        | 38   | 0.8  | 1006 | 6.8  | 2549 | 10.9 | 2779 | 12.2 | 2260 | 17.4 | 414 | 20.2 |
| 3-5                                                                      | 7    | 0.3  | 276  | 1.9  | 1212 | 5.6  | 1404 | 7.2  | 1219 | 10.2 | 381 | 19.5 |
| Missing                                                                  |      |      |      |      |      |      |      |      |      |      |     |      |
| <b>Gestation at delivery (completed weeks)</b>                           |      |      |      |      |      |      |      |      |      |      |     |      |
| 37                                                                       | 119  | 4.1  | 351  | 3.5  | 530  | 3.6  | 534  | 3.5  | 275  | 3.1  | 52  | 3.2  |
| 38                                                                       | 305  | 11.0 | 1136 | 10.1 | 1743 | 9.9  | 1739 | 9.9  | 971  | 10.2 | 146 | 9.9  |
| 39                                                                       | 783  | 22.5 | 2788 | 24.4 | 4409 | 24.2 | 4439 | 23.5 | 2516 | 23.2 | 410 | 27.2 |
| 40                                                                       | 1292 | 36.7 | 4361 | 36.7 | 6970 | 36.2 | 7090 | 37.5 | 3933 | 35.9 | 639 | 35.0 |
| 41 - 42+0 days                                                           | 855  | 25.7 | 2759 | 25.3 | 4439 | 26.1 | 4651 | 25.6 | 2702 | 27.7 | 434 | 24.7 |
| <b>Planned place of birth</b>                                            |      |      |      |      |      |      |      |      |      |      |     |      |
| OU                                                                       | 1445 | 87.5 | 4150 | 84.9 | 5601 | 82.6 | 4946 | 80.7 | 2571 | 80.2 | 497 | 83.2 |
| AMU                                                                      | 1038 | 8.5  | 3445 | 9.6  | 4958 | 10.1 | 4540 | 10.3 | 2212 | 9.6  | 294 | 7.9  |
| FMU                                                                      | 661  | 3.2  | 2115 | 3.5  | 3242 | 3.8  | 3216 | 3.9  | 1674 | 3.8  | 249 | 3.0  |
| Home                                                                     | 210  | 0.8  | 1685 | 2.0  | 4290 | 3.5  | 5751 | 5.1  | 3940 | 6.4  | 641 | 5.8  |
| <b>Birth weight (grams)</b>                                              |      |      |      |      |      |      |      |      |      |      |     |      |
| < 2500                                                                   | 53   | 1.9  | 146  | 1.8  | 166  | 1.4  | 159  | 1.1  | 75   | 1.0  | 17  | 1.3  |
| 2500 - 2999                                                              | 561  | 18.4 | 1728 | 16.4 | 2281 | 14.5 | 1924 | 12.7 | 1100 | 12.5 | 168 | 12.8 |
| 3000 - 3499                                                              | 1502 | 44.6 | 4678 | 41.1 | 7171 | 39.3 | 6960 | 38.2 | 3644 | 36.5 | 596 | 37.1 |
| 3500 - 3999                                                              | 977  | 28.4 | 3664 | 30.9 | 6256 | 33.4 | 6767 | 35.0 | 3888 | 35.3 | 617 | 36.9 |
| 4000 - 4499                                                              | 233  | 6.0  | 1023 | 8.7  | 1926 | 10.0 | 2294 | 11.4 | 1432 | 12.5 | 239 | 9.9  |
| ≥ 4500                                                                   | 21   | 0.7  | 135  | 1.2  | 262  | 1.5  | 303  | 1.6  | 237  | 2.3  | 40  | 2.0  |
| Missing                                                                  | 7    |      | 21   |      | 29   |      | 46   |      | 21   |      | 4   |      |
| <b>Complicating conditions identified at the start of care in labour</b> |      |      |      |      |      |      |      |      |      |      |     |      |
| Prolonged rupture of membranes > 18 hours                                | 145  | 7.1  | 411  | 6.1  | 678  | 6.5  | 706  | 7.1  | 415  | 7.0  | 78  | 8.9  |
| Meconium stained liquor                                                  | 126  | 5.8  | 322  | 4.8  | 469  | 5.0  | 541  | 6.1  | 295  | 5.9  | 60  | 7.4  |
| Proteinuria 1+ or more                                                   | 79   | 2.3  | 203  | 1.7  | 261  | 1.9  | 226  | 1.6  | 109  | 1.7  | 20  | 1.6  |
| Hypertension                                                             | 55   | 2.6  | 160  | 2.2  | 232  | 2.4  | 207  | 2.0  | 102  | 2.1  | 17  | 2.0  |
| Abnormal vaginal bleeding                                                | 16   | 0.7  | 57   | 0.9  | 79   | 0.9  | 119  | 1.5  | 77   | 2.1  | 16  | 2.1  |



|                                   |            |             |             |             |             |             |             |             |             |             |            |             |
|-----------------------------------|------------|-------------|-------------|-------------|-------------|-------------|-------------|-------------|-------------|-------------|------------|-------------|
| Non-cephalic presentation         | 5          | 0.2         | 31          | 0.5         | 44          | 0.4         | 64          | 0.5         | 46          | 0.7         | 3          | 0.3         |
| Abnormal fetal heart rate         | 41         | 1.5         | 106         | 1.7         | 162         | 1.8         | 143         | 1.7         | 82          | 1.7         | 27         | 3.0         |
| Other complications               | 14         | 0.6         | 24          | 0.3         | 23          | 0.2         | 27          | 0.1         | 11          | 0.2         | 2          | 0.2         |
| <b>Any complicating condition</b> | <b>431</b> | <b>18.5</b> | <b>1175</b> | <b>16.1</b> | <b>1744</b> | <b>16.6</b> | <b>1829</b> | <b>18.0</b> | <b>1001</b> | <b>18.1</b> | <b>199</b> | <b>22.5</b> |

<sup>1</sup> Probability weights are incorporated to account for differences in the probability of a woman being selected for inclusion in the study arising from differences in each unit/trust's period of participation and the stratum specific probabilities of selection of OUs.

1  
2  
3  
4  
5  
6  
7  
8  
9  
10  
11  
12  
13  
14  
15  
16  
17  
18  
19  
20  
21  
22  
23  
24  
25  
26  
27  
28  
29  
30  
31  
32  
33  
34  
35  
36  
37  
38  
39  
40  
41  
42  
43  
44  
45  
46  
47  
48  
49

**Table 2 Association between maternal age (per 5-year increase) and maternal and perinatal outcomes in low risk women aged between 16 and 40 years old (inclusive)**

|                                          | Nulliparous women                           |             |                         |             | Multiparous women                          |             |                         |             |
|------------------------------------------|---------------------------------------------|-------------|-------------------------|-------------|--------------------------------------------|-------------|-------------------------|-------------|
|                                          | Unadjusted <sup>1</sup>                     |             | Adjusted <sup>1,2</sup> |             | Unadjusted <sup>1</sup>                    |             | Adjusted <sup>1,2</sup> |             |
|                                          | RR                                          | (95% CI)    | RR                      | (95% CI)    | RR                                         | (95% CI)    | RR                      | (95% CI)    |
| Maternal composite                       | 1.13                                        | (1.11-1.16) | 1.13                    | (1.11-1.16) | 1.07                                       | (1.03-1.13) | 1.08                    | (1.03-1.14) |
| OU                                       | 1.13                                        | (1.11-1.16) | 1.12                    | (1.10-1.15) |                                            |             |                         |             |
| Non-OU <sup>1,3</sup>                    | 1.22                                        | (1.19-1.26) | 1.21                    | (1.18-1.25) |                                            |             |                         |             |
|                                          | Wald test for interaction $P^{1,4} < 0.001$ |             |                         |             | Wald test for interaction $P^{1,4} = 0.34$ |             |                         |             |
| Augmentation                             | 1.13                                        | (1.09-1.16) | 1.12                    | (1.08-1.17) | 1.00                                       | (0.92-1.08) | 1.01                    | (0.92-1.11) |
| OU                                       | 1.13                                        | (1.09-1.17) | 1.12                    | (1.07-1.17) |                                            |             |                         |             |
| Non-OU <sup>1,3</sup>                    | 1.25                                        | (1.20-1.31) | 1.23                    | (1.18-1.28) |                                            |             |                         |             |
|                                          | Wald test for interaction $P^{1,4} < 0.001$ |             |                         |             | Wald test for interaction $P^{1,4} = 0.24$ |             |                         |             |
| Instrumental delivery                    | 1.20                                        | (1.13-1.26) | 1.18                    | (1.12-1.25) | 1.14                                       | (1.04-1.25) | 1.15                    | (1.05-1.27) |
|                                          | Wald test for interaction $P^{1,4} = 0.18$  |             |                         |             | Wald test for interaction $P^{1,4} = 0.06$ |             |                         |             |
| Intrapartum caesarean section            | 1.27                                        | (1.23-1.31) | 1.27                    | (1.23-1.32) | 1.16                                       | (1.07-1.26) | 1.16                    | (1.06-1.28) |
|                                          | Wald test for interaction $P^{1,4} = 0.26$  |             |                         |             | Wald test for interaction $P^{1,4} = 0.50$ |             |                         |             |
| General anaesthesia                      | 1.06                                        | (0.93-1.20) | 1.06                    | (0.92-1.22) | 1.05                                       | (0.87-1.27) | 1.09                    | (0.91-1.32) |
|                                          | Wald test for interaction $P^{1,4} = 0.83$  |             |                         |             | Wald test for interaction $P^{1,4} = 0.15$ |             |                         |             |
| Maternal blood transfusion               | 1.09                                        | (0.97-1.23) | 1.13                    | (0.95-1.34) | 1.23                                       | (0.95-1.60) | 1.24                    | (0.94-1.62) |
|                                          | Wald test for interaction $P^{1,4} = 0.38$  |             |                         |             | Wald test for interaction $P^{1,4} = 0.44$ |             |                         |             |
| Third/fourth degree perineal tear        | 1.17                                        | (1.09-1.27) | 1.12                    | (1.02-1.23) | 1.10                                       | (0.98-1.23) | 1.01                    | (0.89-1.15) |
|                                          | Wald test for interaction $P^{1,4} = 0.43$  |             |                         |             | Wald test for interaction $P^{1,4} = 0.29$ |             |                         |             |
| Maternal admission for higher level care | 1.28                                        | (1.03-1.58) | 1.46                    | (1.07-1.99) | 1.40                                       | (1.01-1.92) | 1.49                    | (1.06-2.10) |
|                                          | Wald test for interaction $P^{1,4} = 0.41$  |             |                         |             | Wald test for interaction $P^{1,4} = 0.15$ |             |                         |             |
| Perinatal composite                      | 1.07                                        | (0.97-1.17) | 1.06                    | (0.95-1.17) | 1.02                                       | (0.87-1.19) | 0.98                    | (0.84-1.15) |
|                                          | Wald test for interaction $P^{1,4} = 0.92$  |             |                         |             | Wald test for interaction $P^{1,4} = 0.66$ |             |                         |             |

<sup>1</sup> Probability weights are incorporated to account for differences in the probability of a woman being selected for inclusion in the study arising from differences in each unit/trust's period of participation and the stratum specific probabilities of selection of OUs.

1  
2  
3  
4  
5 <sup>2</sup> Adjusted for ethnic group, understanding of English, marital/partner status, BMI in pregnancy, index of multiple deprivation score quintile, gestation at  
6 delivery, and planned place of birth (OU vs. AMU vs. FMU vs. home).  
7

8 <sup>3</sup> Results in these rows were adjusted for ethnic group, understanding of English, marital/partner status, BMI in pregnancy, index of multiple deprivation  
9 score quintile, and gestation at delivery.  
10

11 <sup>4</sup> P for interaction, results in these rows were adjusted for ethnic group, understanding of English, marital/partner status, BMI in pregnancy, index of  
12 multiple deprivation score quintile, gestation at delivery, and planned place of birth (OU vs. non-OU).  
13  
14  
15  
16  
17  
18  
19  
20  
21  
22  
23  
24  
25  
26  
27  
28  
29  
30  
31  
32  
33  
34  
35  
36  
37  
38  
39  
40  
41  
42  
43  
44  
45  
46  
47  
48  
49

**Table 3 Intrapartum interventions and adverse maternal outcomes by maternal age in low risk nulliparous women aged 16 and over**

| Age (years)                          | Events / Births<br>n/N | OU                         |             | Events / Births<br>n/N | Non-OU                     |             |
|--------------------------------------|------------------------|----------------------------|-------------|------------------------|----------------------------|-------------|
|                                      |                        | Weighted <sup>1</sup><br>% | (95% CI)    |                        | Weighted <sup>1</sup><br>% | (95% CI)    |
| <b>Maternal composite</b>            |                        |                            |             |                        |                            |             |
| 16-19                                | 480/1239               | 39.4                       | (35.6-43.3) | 252/1553               | 17.5                       | (15.2-20.1) |
| 20-24                                | 1229/2577              | 47.9                       | (44.7-51.1) | 886/3679               | 24.2                       | (21.8-26.8) |
| 25-29                                | 1670/3003              | 55.6                       | (53.4-57.9) | 1680/5354              | 32.3                       | (29.5-35.2) |
| 30-34                                | 1402/2322              | 61.1                       | (57.3-64.8) | 1730/4897              | 36.6                       | (34.2-39.1) |
| 35-39                                | 622/957                | 65.5                       | (61.8-69.1) | 792/1995               | 39.9                       | (36.0-43.9) |
| 40+                                  | 108/148                | 71.9                       | (63.0-79.3) | 83/196                 | 44.8                       | (35.2-54.7) |
| Total                                | 5511/10246             | 54.4                       | (51.9-56.9) | 5423/17674             | 31.3                       | (29.3-33.4) |
| <b>Augmentation</b>                  |                        |                            |             |                        |                            |             |
| 16-19                                | 317/1245               | 25.9                       | (22.5-29.7) | 141/1564               | 8.6                        | (7.0-10.5)  |
| 20-24                                | 790/2584               | 30.7                       | (26.9-34.7) | 489/3706               | 12.9                       | (11.1-14.9) |
| 25-29                                | 1079/3011              | 35.7                       | (33.4-38.1) | 918/5372               | 17.4                       | (15.6-19.3) |
| 30-34                                | 867/2318               | 37.5                       | (34.1-41.1) | 964/4921               | 19.9                       | (18.3-21.7) |
| 35-39                                | 402/955                | 42.2                       | (36.4-48.1) | 473/2015               | 22.6                       | (19.8-25.7) |
| 40+                                  | 71/149                 | 47.6                       | (37.0-58.4) | 44/196                 | 23.7                       | (15.7-34.1) |
| Total                                | 3526/10262             | 34.6                       | (31.9-37.4) | 3029/17774             | 16.9                       | (15.7-18.1) |
| <b>Instrumental delivery</b>         |                        |                            |             |                        |                            |             |
| 16-19                                | 191/1266               | 15.1                       | (12.5-18.2) | 99/1568                | 7.9                        | (6.2-10.2)  |
| 20-24                                | 469/2618               | 17.9                       | (15.9-20.0) | 392/3717               | 10.6                       | (8.9-12.5)  |
| 25-29                                | 707/3039               | 23.4                       | (21.3-25.6) | 772/5391               | 15.0                       | (13.1-17.0) |
| 30-34                                | 591/2349               | 26.3                       | (21.3-32.1) | 795/4950               | 17.0                       | (15.2-19.1) |
| 35-39                                | 275/968                | 29.5                       | (25.0-34.4) | 401/2018               | 19.4                       | (15.9-23.6) |
| 40+                                  | 41/149                 | 30.4                       | (20.0-43.2) | 37/197                 | 21.0                       | (13.3-31.5) |
| Total                                | 2274/10389             | 22.5                       | (19.9-25.3) | 2496/17841             | 14.5                       | (13.0-16.0) |
| <b>Intrapartum caesarean section</b> |                        |                            |             |                        |                            |             |
| 16-19                                | 101/1266               | 8.3                        | (6.5-10.5)  | 55/1568                | 3.3                        | (2.5-4.2)   |
| 20-24                                | 313/2618               | 12.2                       | (10.4-14.2) | 194/3717               | 5.2                        | (4.2-6.5)   |
| 25-29                                | 461/3039               | 15.2                       | (13.3-17.2) | 408/5391               | 8.0                        | (6.9-9.3)   |
| 30-34                                | 466/2349               | 19.8                       | (17.5-22.3) | 452/4950               | 9.0                        | (7.9-10.4)  |
| 35-39                                | 223/968                | 23.0                       | (19.8-26.5) | 212/2018               | 11.2                       | (9.0-13.9)  |
| 40+                                  | 47/149                 | 29.2                       | (20.9-39.3) | 22/197                 | 9.7                        | (5.2-17.2)  |
| Total                                | 1611/10389             | 15.7                       | (14.1-17.5) | 1343/17841             | 7.6                        | (6.8-8.4)   |

<sup>1</sup> Probability weights are incorporated to account for differences in the probability of a woman being selected for inclusion in the study arising from differences in each unit/trust's period of participation and the stratum specific probabilities of selection of OUs.

**Table 4 Relative risk for non-OU compared to OU by age groups in nulliparous women**

| <u>Age (years)</u>               | <u>Unadjusted RR<sup>1</sup><br/>(95% CI)</u> | <u>Adjusted RR<sup>1,2</sup> (95% CI)</u> | <u>Adjusted RR<sup>1,3</sup> (95% CI)</u> |
|----------------------------------|-----------------------------------------------|-------------------------------------------|-------------------------------------------|
| <b><u>Maternal composite</u></b> |                                               |                                           |                                           |
| <u>16-19</u>                     | <u>0.44 (0.38-0.53)</u>                       | <u>0.45 (0.38-0.54)</u>                   | <u>0.49 (0.42-0.58)</u>                   |
| <u>20-24</u>                     | <u>0.51 (0.45-0.57)</u>                       | <u>0.51 (0.45-0.58)</u>                   | <u>0.55 (0.49-0.62)</u>                   |
| <u>25-29</u>                     | <u>0.58 (0.53-0.64)</u>                       | <u>0.59 (0.54-0.65)</u>                   | <u>0.63 (0.57-0.70)</u>                   |
| <u>30-34</u>                     | <u>0.60 (0.55-0.66)</u>                       | <u>0.61 (0.56-0.67)</u>                   | <u>0.66 (0.60-0.73)</u>                   |
| <u>35-39</u>                     | <u>0.61 (0.54-0.68)</u>                       | <u>0.62 (0.56-0.69)</u>                   | <u>0.68 (0.61-0.76)</u>                   |
| <u>40+</u>                       | <u>0.62 (0.49-0.80)</u>                       | <u>0.66 (0.51-0.87)</u>                   | <u>0.70 (0.53-0.93)</u>                   |
| <b><u>Augmentation</u></b>       |                                               |                                           |                                           |
| <u>16-19</u>                     | <u>0.33 (0.26-0.42)</u>                       | <u>0.34 (0.27-0.44)</u>                   | <u>0.37 (0.29-0.47)</u>                   |
| <u>20-24</u>                     | <u>0.42 (0.35-0.51)</u>                       | <u>0.43 (0.35-0.52)</u>                   | <u>0.47 (0.39-0.57)</u>                   |
| <u>25-29</u>                     | <u>0.49 (0.43-0.55)</u>                       | <u>0.50 (0.45-0.57)</u>                   | <u>0.56 (0.49-0.63)</u>                   |
| <u>30-34</u>                     | <u>0.53 (0.47-0.60)</u>                       | <u>0.55 (0.48-0.63)</u>                   | <u>0.61 (0.53-0.71)</u>                   |
| <u>35-39</u>                     | <u>0.54 (0.44-0.65)</u>                       | <u>0.54 (0.46-0.64)</u>                   | <u>0.61 (0.51-0.74)</u>                   |
| <u>40+</u>                       | <u>0.50 (0.32-0.78)</u>                       | <u>0.53 (0.33-0.84)</u>                   | <u>0.58 (0.36-0.94)</u>                   |

<sup>1</sup> Probability weights are incorporated to account for differences in the probability of a woman being selected for inclusion in the study arising from differences in each unit/trust's period of participation and the stratum specific probabilities of selection of OUs.

<sup>2</sup> Adjusted for ethnic group, understanding of English, marital/partner status, BMI in pregnancy, index of multiple deprivation score quintile, and gestation at delivery.

<sup>3</sup> Adjusted for ethnic group, understanding of English, marital/partner status, BMI in pregnancy, index of multiple deprivation score quintile, gestation at delivery, and complicating conditions identified at the start of care in labour.

**Table 4.5** Intrapartum interventions and adverse maternal outcomes by maternal age in low risk multiparous women aged 16 and over

| Age (years)                          | Events / Births<br>n/N | OU                         |             | Events / Births<br>n/N | Non-OU                     |            |
|--------------------------------------|------------------------|----------------------------|-------------|------------------------|----------------------------|------------|
|                                      |                        | Weighted <sup>1</sup><br>% | (95% CI)    |                        | Weighted <sup>1</sup><br>% | (95% CI)   |
| <b>Maternal composite</b>            |                        |                            |             |                        |                            |            |
| 16-19                                | 35/177                 | 20.2                       | (14.1-28.0) | 20/338                 | 6.6                        | (4.1-10.6) |
| 20-24                                | 242/1506               | 16.2                       | (13.8-19.0) | 146/3486               | 4.6                        | (3.6-5.8)  |
| 25-29                                | 468/2504               | 18.9                       | (16.9-20.9) | 297/6989               | 4.8                        | (4.1-5.7)  |
| 30-34                                | 492/2548               | 19.2                       | (16.8-21.8) | 418/8440               | 5.4                        | (4.7-6.2)  |
| 35-39                                | 344/1575               | 21.9                       | (19.4-24.7) | 273/5737               | 5.6                        | (4.8-6.6)  |
| 40+                                  | 82/340                 | 24.1                       | (20.7-28.0) | 65/975                 | 7.4                        | (5.6-9.7)  |
| Total                                | 1663/8650              | 19.3                       | (17.6-21.1) | 1219/25965             | 5.3                        | (4.7-5.9)  |
| <b>Augmentation</b>                  |                        |                            |             |                        |                            |            |
| 16-19                                | 19/178                 | 10.5                       | (5.9-17.9)  | 11/340                 | 3.8                        | (2.0-7.1)  |
| 20-24                                | 144/1516               | 9.4                        | (7.5-11.8)  | 62/3520                | 2.0                        | (1.4-2.7)  |
| 25-29                                | 247/2529               | 9.9                        | (8.2-12.0)  | 109/7077               | 1.8                        | (1.4-2.3)  |
| 30-34                                | 255/2572               | 9.7                        | (8.0-11.7)  | 132/8535               | 1.6                        | (1.3-2.0)  |
| 35-39                                | 156/1592               | 9.8                        | (8.2-11.6)  | 89/5796                | 1.8                        | (1.3-2.5)  |
| 40+                                  | 42/345                 | 12.2                       | (9.5-15.5)  | 18/985                 | 1.8                        | (1.1-3.2)  |
| Total                                | 863/8732               | 9.8                        | (8.5-11.4)  | 421/26253              | 1.8                        | (1.5-2.1)  |
| <b>Instrumental delivery</b>         |                        |                            |             |                        |                            |            |
| 16-19                                | 12/179                 | 7.5                        | (3.6-14.9)  | 7/340                  | 3.1                        | (1.3-7.1)  |
| 20-24                                | 55/1530                | 3.6                        | (2.7-4.9)   | 38/3520                | 1.4                        | (1.0-2.0)  |
| 25-29                                | 139/2557               | 5.5                        | (4.6-6.5)   | 102/7092               | 1.8                        | (1.4-2.3)  |
| 30-34                                | 159/2594               | 6.1                        | (5.0-7.5)   | 124/8544               | 1.6                        | (1.2-2.0)  |
| 35-39                                | 102/1600               | 6.6                        | (5.0-8.6)   | 82/5802                | 1.8                        | (1.4-2.4)  |
| 40+                                  | 30/347                 | 8.8                        | (5.5-13.8)  | 17/987                 | 2.5                        | (1.3-4.7)  |
| Total                                | 497/8807               | 5.7                        | (4.9-6.7)   | 370/26285              | 1.7                        | (1.4-2.1)  |
| <b>Intrapartum caesarean section</b> |                        |                            |             |                        |                            |            |
| 16-19                                | 6/179                  | 3.4                        | (1.4-7.7)   | 4/340                  | 0.9                        | (0.3-2.5)  |
| 20-24                                | 62/1530                | 4.1                        | (2.6-6.3)   | 21/3520                | 0.6                        | (0.3-1.1)  |
| 25-29                                | 121/2557               | 4.8                        | (3.8-6.1)   | 48/7092                | 0.7                        | (0.5-0.9)  |
| 30-34                                | 134/2594               | 5.1                        | (4.0-6.5)   | 70/8544                | 0.9                        | (0.6-1.2)  |
| 35-39                                | 110/1600               | 6.8                        | (5.1-9.1)   | 53/5802                | 1.1                        | (0.8-1.5)  |
| 40+                                  | 16/347                 | 4.8                        | (3.1-7.4)   | 15/987                 | 1.5                        | (0.8-2.7)  |
| Total                                | 449/8807               | 5.1                        | (4.2-6.3)   | 211/26285              | 0.8                        | (0.7-1.1)  |

<sup>1</sup> Probability weights are incorporated to account for differences in the probability of a woman being selected for inclusion in the study arising from differences in each unit/trust's period of participation and the stratum specific probabilities of selection of OUs.

Table 5-6 Perinatal outcomes by maternal age in low risk women aged 16 and over

| Age (years)        | OU                     |                                     | Non-OU                 |                                     |
|--------------------|------------------------|-------------------------------------|------------------------|-------------------------------------|
|                    | Events / Births<br>n/N | Weighted <sup>1</sup><br>% (95% CI) | Events / Births<br>n/N | Weighted <sup>1</sup><br>% (95% CI) |
| <b>Nulliparous</b> |                        |                                     |                        |                                     |
| 16-19              | 39/1260                | 3.2 (2.2-4.5)                       | 31/1553                | 2.9 (1.9-4.4)                       |
| 20-24              | 89/2610                | 3.5 (2.5-5.0)                       | 94/3700                | 2.4 (1.9-3.2)                       |
| 25-29              | 92/3026                | 3.3 (2.6-4.0)                       | 123/5357               | 2.1 (1.7-2.8)                       |
| 30-34              | 101/2340               | 4.2 (3.1-5.6)                       | 128/4918               | 3.0 (2.2-4.0)                       |
| 35-39              | 37/962                 | 3.9 (2.8-5.4)                       | 65/1999                | 3.0 (2.1-4.1)                       |
| 40+                | 10/149                 | 7.5 (3.4-15.7)                      | 8/195                  | 3.9 (1.0-14.0)                      |
| Total              | 368/10347              | 3.7 (2.9-4.6)                       | 449/17722              | 2.6 (2.2-3.1)                       |
| <b>Multiparous</b> |                        |                                     |                        |                                     |
| 16-19              | 6/179                  | 3.0 (1.4-6.4)                       | 5/337                  | 1.7 (0.6-4.6)                       |
| 20-24              | 26/1519                | 1.8 (1.2-2.7)                       | 43/3489                | 1.3 (0.8-2.0)                       |
| 25-29              | 41/2547                | 1.6 (1.2-2.3)                       | 73/7032                | 1.1 (0.8-1.6)                       |
| 30-34              | 50/2578                | 2.0 (1.5-2.6)                       | 111/8468               | 1.2 (1.0-1.5)                       |
| 35-39              | 33/1594                | 2.1 (1.3-3.3)                       | 88/5761                | 1.6 (1.2-2.2)                       |
| 40+                | 7/345                  | 2.1 (0.9-4.6)                       | 20/978                 | 2.3 (1.3-4.1)                       |
| Total              | 163/8762               | 1.9 (1.5-2.4)                       | 340/26065              | 1.3 (1.1-1.6)                       |

<sup>1</sup> Probability weights are incorporated to account for differences in the probability of a woman being selected for inclusion in the study arising from differences in each unit/trust's period of participation and the stratum specific probabilities of selection of OUs.

## Table of Contents

|                                                                                                                                                                                                                              |    |
|------------------------------------------------------------------------------------------------------------------------------------------------------------------------------------------------------------------------------|----|
| Figure S1 Association between maternal age and less common intrapartum interventions and adverse maternal outcomes in low risk women aged 16 and over .....                                                                  | 2  |
| Figure S2 Association between maternal age and epidural in low risk women aged 16 and over .....                                                                                                                             | 3  |
| Table S1 Categorisation of potential confounders .....                                                                                                                                                                       | 4  |
| Table S2 Characteristics of low risk nulliparous women aged 16 and over by maternal age category..                                                                                                                           | 5  |
| Table S3 Characteristics of low risk multiparous women aged 16 and over by maternal age category                                                                                                                             | 7  |
| Table S4 Sample size of low risk women aged 40 and over by planned place of birth and parity .....                                                                                                                           | 9  |
| Table S5 Association between maternal age and intrapartum interventions and adverse maternal outcomes in low risk women aged between 16 and 40 years old (inclusive) additionally adjusted for complicating conditions ..... | 12 |
| Table S6 Less common intrapartum interventions and adverse maternal outcomes by maternal age in low risk nulliparous women aged 16 and over .....                                                                            | 13 |
| Table S7 Less common intrapartum interventions and adverse maternal outcomes by maternal age in low risk multiparous women aged 16 and over.....                                                                             | 14 |
| Table S8 Event rates in restricted sample of nulliparous women aged 16 and over without complicating conditions identified at the start of care in labour .....                                                              | 15 |
| Table S9 Event rates in restricted sample of multiparous women aged 16 and over without complicating conditions identified at the start of care in labour .....                                                              | 16 |
| Table S10 Relative risk for non-OU compared to OU by age groups in nulliparous women without complicating conditions .....                                                                                                   | 17 |



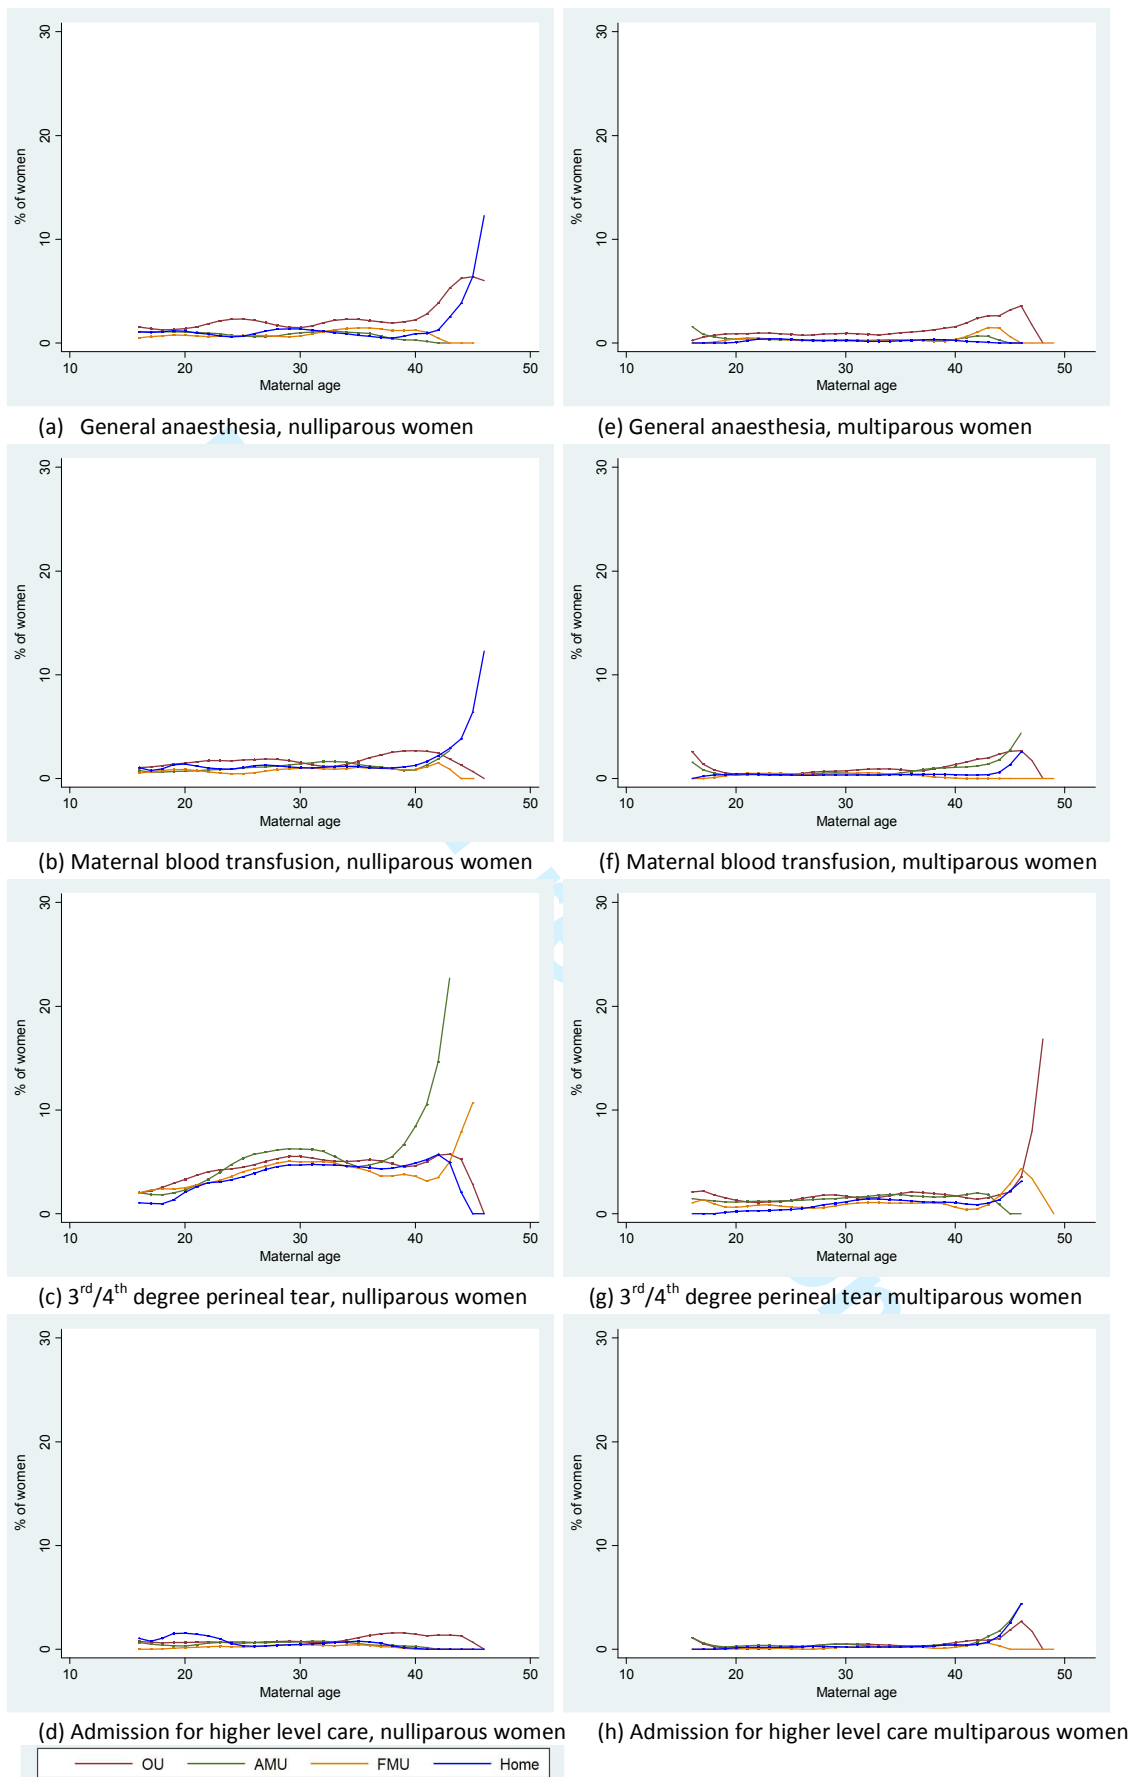

Figure S1 Association between maternal age and less common intrapartum interventions and adverse maternal outcomes in low risk women aged 16 and over

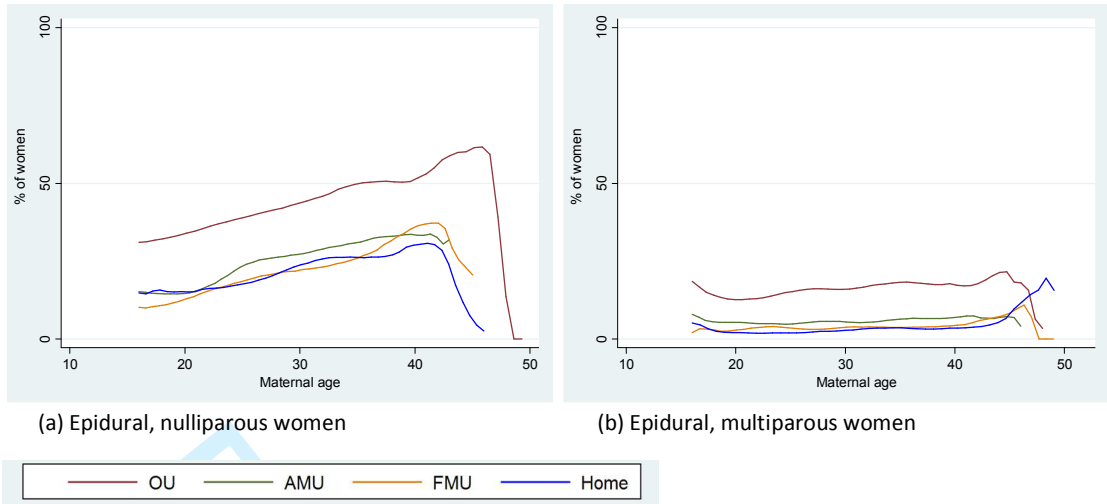

Figure S2 Association between maternal age and epidural in low risk women aged 16 and over

1  
2  
3  
4  
5  
6  
7  
8  
9  
10  
11  
12  
13  
14  
15  
16  
17  
18  
19  
20  
21  
22  
23  
24  
25  
26  
27  
28  
29  
30  
31  
32  
33  
34  
35  
36  
37  
38  
39  
40  
41  
42  
43  
44  
45  
46  
47  
48  
49  
50  
51  
52  
53  
54  
55  
56  
57  
58  
59  
60

Table S1 Categorisation of potential confounders

| Covariate                                                         | Response categories                                                                                                                                                                 | Alternative categories in case of few events                                                   |
|-------------------------------------------------------------------|-------------------------------------------------------------------------------------------------------------------------------------------------------------------------------------|------------------------------------------------------------------------------------------------|
| Ethnic group                                                      | 1 White<br>2 Non-white                                                                                                                                                              |                                                                                                |
| Understanding of English                                          | 1 Fluent<br>2 Not fluent (some/none)                                                                                                                                                |                                                                                                |
| Marital/partner status                                            | 1 Married/living with partner<br>2 Single/unsupported by partner                                                                                                                    |                                                                                                |
| BMI in pregnancy (kg/m <sup>2</sup> )                             | 1 Less than 18.5<br>2 18.5 to 24.9<br>3 25.0 to 29.9<br>4 30.0 to 35.0<br>5 Not recorded                                                                                            |                                                                                                |
| Index of Multiple Deprivation (IMD) quintile                      | 1 1 <sup>st</sup> quintile (least deprived)<br>2 2 <sup>nd</sup> quintile<br>3 3 <sup>rd</sup> quintile<br>4 4 <sup>th</sup> quintile<br>5 5 <sup>th</sup> quintile (most deprived) | 1 1 <sup>st</sup> to 3 <sup>rd</sup> quintile<br>2 4 <sup>th</sup> to 5 <sup>th</sup> quintile |
| Previous pregnancies ≥24 weeks                                    | 1 0 Nulliparous<br>2 1 previous<br>3 2 previous<br>4 3 or more previous                                                                                                             | 1 Nulliparous<br>2 Multiparous                                                                 |
| Gestation at delivery (completed weeks)                           | 1 37 weeks<br>2 38 weeks<br>3 39 weeks<br>4 40 weeks<br>5 41 weeks to 42 weeks+0 days                                                                                               | 1 37 - 39 weeks<br>2 ≥ 40 weeks                                                                |
| Planned place of birth                                            | 1 Obstetric unit<br>2 Alongside midwifery unit<br>3 Freestanding midwifery unit<br>4 Home                                                                                           |                                                                                                |
| Complicating conditions identified at the start of care in labour | 1 No complicating conditions<br>2 One or more complicating conditions                                                                                                               |                                                                                                |

Table S2 Characteristics of low risk nulliparous women aged 16 and over by maternal age category

|                                                | 16 - 19 years<br>n=2835 |                | 20 - 24 years<br>n=6341 |                | 25 - 29 years<br>n=8438 |                | 30 - 34 years<br>n=7307 |                | 35 - 39 years<br>n=2989 |                | ≥ 40 years<br>n=346 |                |
|------------------------------------------------|-------------------------|----------------|-------------------------|----------------|-------------------------|----------------|-------------------------|----------------|-------------------------|----------------|---------------------|----------------|
|                                                | n                       | % <sup>1</sup> | n                   | % <sup>1</sup> |
| <b>Ethnic group</b>                            |                         |                |                         |                |                         |                |                         |                |                         |                |                     |                |
| White                                          | 2600                    | 90.4           | 5329                    | 80.6           | 7085                    | 78.5           | 6434                    | 82.7           | 2686                    | 86.0           | 314                 | 86.1           |
| Non-white                                      | 234                     | 9.6            | 1004                    | 19.4           | 1340                    | 21.5           | 859                     | 17.3           | 298                     | 14.0           | 31                  | 13.9           |
| Missing                                        | 1                       |                | 8                       |                | 13                      |                | 14                      |                | 5                       |                | 1                   |                |
| <b>Understanding of English</b>                |                         |                |                         |                |                         |                |                         |                |                         |                |                     |                |
| Fluent                                         | 2749                    | 96.8           | 5709                    | 88.6           | 7757                    | 89.8           | 6999                    | 94.4           | 2931                    | 97.5           | 341                 | 98.7           |
| Not fluent                                     | 81                      | 3.2            | 602                     | 11.4           | 636                     | 10.2           | 276                     | 5.7            | 48                      | 2.5            | 3                   | 1.3            |
| Missing                                        | 5                       |                | 30                      |                | 45                      |                | 32                      |                | 10                      |                | 2                   |                |
| <b>Marital/partner status</b>                  |                         |                |                         |                |                         |                |                         |                |                         |                |                     |                |
| Married/living with partner                    | 1484                    | 50.2           | 5171                    | 80.1           | 7869                    | 92.2           | 7015                    | 95.9           | 2854                    | 94.9           | 320                 | 92.8           |
| Single/unsupported by partner                  | 1284                    | 49.8           | 1072                    | 19.9           | 474                     | 7.8            | 217                     | 4.1            | 97                      | 5.1            | 23                  | 7.3            |
| Missing                                        | 67                      |                | 98                      |                | 95                      |                | 75                      |                | 38                      |                | 3                   |                |
| <b>BMI in pregnancy (kg/m<sup>2</sup>)</b>     |                         |                |                         |                |                         |                |                         |                |                         |                |                     |                |
| < 18.5                                         | 163                     | 6.2            | 237                     | 3.9            | 183                     | 2.6            | 140                     | 2.2            | 49                      | 1.6            | 0                   | 0.0            |
| 18.5 - 24.9                                    | 1510                    | 51.0           | 3136                    | 47.8           | 4216                    | 47.2           | 3813                    | 48.7           | 1441                    | 46.0           | 170                 | 44.8           |
| 25.0 - 29.9                                    | 494                     | 18.1           | 1358                    | 20.9           | 1897                    | 23.6           | 1528                    | 21.7           | 682                     | 25.6           | 74                  | 24.3           |
| 30.0 - 35.0                                    | 189                     | 7.1            | 535                     | 9.0            | 641                     | 8.3            | 438                     | 7.6            | 192                     | 8.1            | 21                  | 8.0            |
| Not recorded                                   | 477                     | 17.7           | 1059                    | 18.4           | 1477                    | 18.3           | 1363                    | 19.9           | 616                     | 18.8           | 80                  | 22.9           |
| Missing                                        | 2                       |                | 16                      |                | 24                      |                | 25                      |                | 9                       |                | 1                   |                |
| <b>IMD quintile</b>                            |                         |                |                         |                |                         |                |                         |                |                         |                |                     |                |
| 1 <sup>st</sup> (Least deprived)               | 212                     | 7.2            | 670                     | 9.2            | 1475                    | 14.5           | 1667                    | 21.4           | 741                     | 22.8           | 89                  | 26.9           |
| 2 <sup>nd</sup>                                | 356                     | 12.6           | 940                     | 14.5           | 1690                    | 19.7           | 1641                    | 22.1           | 689                     | 22.0           | 89                  | 23.8           |
| 3 <sup>rd</sup>                                | 538                     | 17.7           | 1239                    | 18.9           | 1769                    | 19.3           | 1544                    | 20.7           | 633                     | 21.1           | 69                  | 20.0           |
| 4 <sup>th</sup>                                | 689                     | 25.3           | 1525                    | 23.6           | 1808                    | 22.7           | 1455                    | 20.7           | 558                     | 20.3           | 56                  | 16.9           |
| 5 <sup>th</sup> (Most deprived)                | 1025                    | 37.2           | 1932                    | 33.8           | 1663                    | 23.7           | 972                     | 15.2           | 353                     | 13.9           | 40                  | 12.5           |
| Missing                                        | 15                      |                | 35                      |                | 33                      |                | 28                      |                | 15                      |                | 3                   |                |
| <b>Gestation at delivery (completed weeks)</b> |                         |                |                         |                |                         |                |                         |                |                         |                |                     |                |
| 37                                             | 93                      | 3.7            | 189                     | 3.4            | 275                     | 4.0            | 243                     | 3.7            | 90                      | 3.2            | 9                   | 2.4            |
| 38                                             | 255                     | 10.9           | 631                     | 10.1           | 813                     | 9.8            | 717                     | 9.6            | 287                     | 9.3            | 29                  | 6.0            |
| 39                                             | 649                     | 21.9           | 1462                    | 23.5           | 1989                    | 23.3           | 1652                    | 22.2           | 700                     | 23.3           | 76                  | 23.6           |
| 40                                             | 1075                    | 36.5           | 2393                    | 36.3           | 3107                    | 34.3           | 2688                    | 36.6           | 1076                    | 35.0           | 132                 | 36.5           |
| 41 - 42+0 days                                 | 763                     | 27.1           | 1666                    | 26.8           | 2254                    | 28.6           | 2007                    | 27.9           | 836                     | 29.2           | 100                 | 31.6           |

|                                                                          |            |             |            |             |             |             |             |             |            |             |           |             |
|--------------------------------------------------------------------------|------------|-------------|------------|-------------|-------------|-------------|-------------|-------------|------------|-------------|-----------|-------------|
| <b>Planned place of birth</b>                                            |            |             |            |             |             |             |             |             |            |             |           |             |
| OU                                                                       | 1266       | 88.0        | 2620       | 86.6        | 3043        | 85.0        | 2351        | 83.5        | 968        | 84.4        | 149       | 89.2        |
| AMU                                                                      | 882        | 8.4         | 2040       | 9.3         | 2535        | 9.7         | 1984        | 10.0        | 752        | 9.2         | 56        | 5.9         |
| FMU                                                                      | 564        | 3.2         | 1235       | 3.3         | 1531        | 3.3         | 1302        | 3.4         | 456        | 2.7         | 47        | 2.0         |
| Home                                                                     | 123        | 0.5         | 446        | 0.8         | 1329        | 2.0         | 1670        | 3.2         | 813        | 3.7         | 94        | 3.0         |
| <b>Birth weight (grams)</b>                                              |            |             |            |             |             |             |             |             |            |             |           |             |
| < 2500                                                                   | 46         | 2.0         | 105        | 2.1         | 88          | 1.4         | 87          | 1.3         | 43         | 1.5         | 6         | 1.9         |
| 2500 - 2999                                                              | 470        | 17.8        | 1053       | 17.4        | 1209        | 16.0        | 914         | 14.1        | 453        | 16.2        | 48        | 10.9        |
| 3000 - 3499                                                              | 1286       | 44.7        | 2709       | 43.0        | 3536        | 41.1        | 3053        | 41.0        | 1167       | 38.8        | 139       | 43.0        |
| 3500 - 3999                                                              | 826        | 28.8        | 1913       | 28.9        | 2782        | 31.8        | 2481        | 33.4        | 997        | 32.1        | 110       | 32.3        |
| 4000 - 4499                                                              | 185        | 6.0         | 487        | 7.6         | 734         | 8.5         | 669         | 8.7         | 282        | 10.0        | 38        | 9.2         |
| ≥ 4500                                                                   | 15         | 0.7         | 64         | 0.9         | 77          | 1.1         | 82          | 1.5         | 40         | 1.5         | 5         | 2.7         |
| Missing                                                                  | 7          |             | 10         |             | 12          |             | 21          |             | 7          |             | 0         |             |
| <b>Complicating conditions identified at the start of care in labour</b> |            |             |            |             |             |             |             |             |            |             |           |             |
| Prolonged rupture of membranes > 18 hours                                | 130        | 7.2         | 293        | 7.4         | 457         | 8.7         | 466         | 10.6        | 209        | 10.8        | 34        | 14.7        |
| Meconium stained liquor                                                  | 112        | 5.9         | 220        | 5.6         | 285         | 6.0         | 286         | 7.4         | 127        | 7.6         | 16        | 6.1         |
| Proteinuria 1+ or more                                                   | 73         | 2.4         | 150        | 2.1         | 161         | 2.4         | 129         | 2.0         | 49         | 2.5         | 8         | 3.5         |
| Hypertension                                                             | 51         | 2.8         | 128        | 2.9         | 156         | 3.2         | 127         | 2.8         | 48         | 3.6         | 10        | 5.0         |
| Abnormal vaginal bleeding                                                | 16         | 0.8         | 38         | 1.0         | 54          | 1.2         | 66          | 1.8         | 42         | 3.3         | 7         | 2.9         |
| Non-cephalic presentation                                                | 5          | 0.2         | 20         | 0.5         | 29          | 0.4         | 38          | 0.7         | 18         | 0.7         | 1         | 0.5         |
| Abnormal fetal heart rate                                                | 35         | 1.5         | 79         | 2.1         | 108         | 2.3         | 83          | 2.1         | 41         | 2.6         | 9         | 3.7         |
| Other complications                                                      | 14         | 0.6         | 15         | 0.3         | 16          | 0.2         | 14          | 0.2         | 5          | 0.3         | 0         | 0.0         |
| <b>Any complicating conditions</b>                                       | <b>390</b> | <b>19.0</b> | <b>825</b> | <b>19.1</b> | <b>1112</b> | <b>21.0</b> | <b>1073</b> | <b>24.1</b> | <b>465</b> | <b>25.7</b> | <b>73</b> | <b>32.2</b> |

<sup>1</sup>Probability weights are incorporated to account for differences in the probability of a woman being selected for inclusion in the study arising from differences in each unit/trust's period of participation and the stratum specific probabilities of selection of OUs.

Table S3 Characteristics of low risk multiparous women aged 16 and over by maternal age category

|                                            | 16-19 years |                | 20 - 24 years |                | 25 - 29 years |                | 30 - 34 years |                | 35 - 39 years |                | ≥ 40 years |                |
|--------------------------------------------|-------------|----------------|---------------|----------------|---------------|----------------|---------------|----------------|---------------|----------------|------------|----------------|
|                                            | n           | % <sup>1</sup> | n             | % <sup>1</sup> | n             | % <sup>1</sup> | n             | % <sup>1</sup> | n             | % <sup>1</sup> | n          | % <sup>1</sup> |
| <b>Ethnic group</b>                        |             |                |               |                |               |                |               |                |               |                |            |                |
| White                                      | 478         | 88.2           | 4356          | 82.1           | 8061          | 76.3           | 9618          | 78.9           | 6653          | 83.2           | 1213       | 86.8           |
| Non-white                                  | 41          | 11.8           | 693           | 17.9           | 1580          | 23.7           | 1516          | 21.1           | 746           | 16.8           | 122        | 13.2           |
| Missing                                    | 0           |                | 5             |                | 12            |                | 12            |                | 9             |                | 0          |                |
| <b>Understanding of English</b>            |             |                |               |                |               |                |               |                |               |                |            |                |
| Fluent                                     | 505         | 96.3           | 4685          | 91.3           | 9000          | 90.3           | 10606         | 91.7           | 7224          | 95.6           | 1297       | 95.9           |
| Not fluent                                 | 13          | 3.8            | 346           | 8.8            | 615           | 9.7            | 500           | 8.3            | 166           | 4.5            | 33         | 4.1            |
| Missing                                    | 1           |                | 23            |                | 38            |                | 40            |                | 18            |                | 5          |                |
| <b>Marital/partner status</b>              |             |                |               |                |               |                |               |                |               |                |            |                |
| Married/living with partner                | 352         | 63.0           | 4379          | 84.5           | 8999          | 92.0           | 10767         | 96.3           | 7150          | 95.6           | 1271       | 95.0           |
| Single/unsupported by partner              | 156         | 37.1           | 605           | 15.5           | 536           | 8.0            | 276           | 3.7            | 196           | 4.4            | 45         | 5.0            |
| Missing                                    | 11          |                | 70            |                | 118           |                | 103           |                | 62            |                | 19         |                |
| <b>BMI in pregnancy (kg/m<sup>2</sup>)</b> |             |                |               |                |               |                |               |                |               |                |            |                |
| < 18.5                                     | 21          | 5.9            | 189           | 4.6            | 230           | 2.6            | 197           | 2.0            | 107           | 1.5            | 18         | 0.3            |
| 18.5 - 24.9                                | 243         | 45.8           | 2180          | 42.2           | 4344          | 44.4           | 5246          | 45.0           | 3423          | 43.7           | 632        | 47.0           |
| 25.0 - 29.9                                | 104         | 17.2           | 1200          | 23.1           | 2444          | 25.7           | 2678          | 24.6           | 1890          | 27.6           | 341        | 28.9           |
| 30.0 - 35.0                                | 44          | 10.4           | 561           | 11.7           | 986           | 10.5           | 961           | 10.0           | 577           | 9.3            | 88         | 8.1            |
| Not recorded                               | 104         | 20.7           | 910           | 18.5           | 1614          | 16.9           | 2026          | 18.5           | 1384          | 17.9           | 249        | 15.7           |
| Missing                                    | 3           |                | 14            |                | 35            |                | 38            |                | 27            |                | 7          |                |
| <b>IMD quintile</b>                        |             |                |               |                |               |                |               |                |               |                |            |                |
| 1 <sup>st</sup> (Least deprived)           | 33          | 3.6            | 432           | 7.4            | 1400          | 13.0           | 2588          | 19.6           | 2042          | 25.7           | 345        | 25.6           |
| 2 <sup>nd</sup>                            | 49          | 10.0           | 581           | 11.4           | 1569          | 15.0           | 2473          | 21.4           | 1745          | 22.4           | 307        | 21.3           |
| 3 <sup>rd</sup>                            | 99          | 21.2           | 876           | 16.4           | 1888          | 17.7           | 2215          | 19.0           | 1502          | 19.4           | 288        | 22.2           |
| 4 <sup>th</sup>                            | 138         | 25.6           | 1259          | 24.6           | 2149          | 22.6           | 2024          | 18.9           | 1207          | 16.5           | 235        | 16.8           |
| 5 <sup>th</sup> (Most deprived)            | 196         | 39.6           | 1889          | 40.2           | 2599          | 31.7           | 1787          | 21.1           | 862           | 16.0           | 157        | 14.1           |
| Missing                                    | 4           |                | 17            |                | 48            |                | 59            |                | 50            |                | 3          |                |
| <b>Previous pregnancies ≥ 24 weeks</b>     |             |                |               |                |               |                |               |                |               |                |            |                |
| 1                                          | 474         | 91.6           | 3772          | 77.1           | 5892          | 64.5           | 6963          | 63.6           | 3929          | 56.3           | 540        | 44.9           |
| 2                                          | 38          | 6.3            | 1006          | 17.9           | 2549          | 23.4           | 2779          | 22.9           | 2260          | 27.5           | 414        | 28.0           |
| 3-5                                        | 7           | 2.2            | 276           | 5.0            | 1212          | 12.1           | 1404          | 13.5           | 1219          | 16.2           | 381        | 27.1           |

|                                                                          |           |             |            |             |            |             |            |             |            |             |            |             |
|--------------------------------------------------------------------------|-----------|-------------|------------|-------------|------------|-------------|------------|-------------|------------|-------------|------------|-------------|
| <b>Gestation at delivery (completed weeks)</b>                           |           |             |            |             |            |             |            |             |            |             |            |             |
| 37                                                                       | 26        | 6.9         | 162        | 3.8         | 255        | 3.2         | 291        | 3.4         | 185        | 3.0         | 43         | 3.6         |
| 38                                                                       | 50        | 12.3        | 505        | 10.0        | 930        | 10.0        | 1022       | 10.3        | 684        | 10.8        | 117        | 11.4        |
| 39                                                                       | 134       | 26.5        | 1326       | 26.0        | 2420       | 25.2        | 2787       | 24.5        | 1816       | 23.1        | 334        | 28.6        |
| 40                                                                       | 217       | 37.7        | 1968       | 37.4        | 3863       | 38.4        | 4402       | 38.2        | 2857       | 36.3        | 507        | 34.4        |
| 41 - 42+0 days                                                           | 92        | 16.7        | 1093       | 22.8        | 2185       | 23.2        | 2644       | 23.6        | 1866       | 26.8        | 334        | 22.0        |
| <b>Planned place of birth</b>                                            |           |             |            |             |            |             |            |             |            |             |            |             |
| OU                                                                       | 179       | 84.6        | 1530       | 82.2        | 2558       | 79.8        | 2595       | 78.3        | 1603       | 77.7        | 348        | 80.9        |
| AMU                                                                      | 156       | 9.6         | 1405       | 10.0        | 2423       | 10.6        | 2556       | 10.5        | 1460       | 9.8         | 238        | 8.7         |
| FMU                                                                      | 97        | 3.4         | 880        | 3.9         | 1711       | 4.4         | 1914       | 4.4         | 1218       | 4.5         | 202        | 3.4         |
| Home                                                                     | 87        | 2.5         | 1239       | 3.9         | 2961       | 5.3         | 4081       | 6.7         | 3127       | 8.0         | 547        | 6.9         |
| <b>Birth weight (grams)</b>                                              |           |             |            |             |            |             |            |             |            |             |            |             |
| < 2500                                                                   | 7         | 0.8         | 41         | 1.3         | 78         | 1.3         | 72         | 1.0         | 32         | 0.7         | 11         | 1.1         |
| 2500 - 2999                                                              | 91        | 22.7        | 675        | 14.6        | 1072       | 12.7        | 1010       | 11.5        | 647        | 10.3        | 120        | 13.5        |
| 3000 - 3499                                                              | 216       | 44.0        | 1969       | 37.9        | 3635       | 37.3        | 3907       | 35.8        | 2477       | 35.2        | 457        | 34.9        |
| 3500 - 3999                                                              | 151       | 26.0        | 1751       | 34.0        | 3474       | 35.2        | 4286       | 36.3        | 2891       | 37.1        | 507        | 38.7        |
| 4000 - 4499                                                              | 48        | 6.1         | 536        | 10.6        | 1192       | 11.6        | 1625       | 13.8        | 1150       | 14.0        | 201        | 10.1        |
| ≥ 4500                                                                   | 6         | 0.5         | 71         | 1.7         | 185        | 1.9         | 221        | 1.6         | 197        | 2.8         | 35         | 1.8         |
| Missing                                                                  | 0         |             | 11         |             | 17         |             | 25         |             | 14         |             | 4          |             |
| <b>Complicating conditions identified at the start of care in labour</b> |           |             |            |             |            |             |            |             |            |             |            |             |
| Prolonged rupture of membranes > 18 hours                                | 15        | 6.1         | 118        | 4.0         | 221        | 4.0         | 240        | 4.0         | 206        | 4.8         | 44         | 6.6         |
| Meconium stained liquor                                                  | 14        | 5.6         | 102        | 3.7         | 184        | 3.8         | 255        | 4.9         | 168        | 4.9         | 44         | 7.9         |
| Proteinuria 1+ or more                                                   | 6         | 1.9         | 53         | 0.9         | 100        | 1.3         | 97         | 1.2         | 60         | 1.2         | 12         | 0.9         |
| Hypertension                                                             | 4         | 1.6         | 32         | 0.9         | 76         | 1.5         | 80         | 1.4         | 54         | 1.2         | 7          | 0.8         |
| Abnormal vaginal bleeding                                                | 0         | 0.0         | 19         | 0.8         | 25         | 0.5         | 53         | 1.2         | 35         | 1.4         | 9          | 1.8         |
| Non-cephalic presentation                                                | 0         | 0.0         | 11         | 0.4         | 15         | 0.3         | 26         | 0.4         | 28         | 0.8         | 2          | 0.3         |
| Abnormal fetal heart rate                                                | 6         | 1.9         | 27         | 1.0         | 54         | 1.2         | 60         | 1.3         | 41         | 1.2         | 18         | 2.8         |
| Other complications                                                      | 0         | 0.0         | 9          | 0.3         | 7          | 0.2         | 13         | 0.1         | 6          | 0.2         | 2          | 0.3         |
| <b>Any complicating conditions</b>                                       | <b>41</b> | <b>15.5</b> | <b>350</b> | <b>11.2</b> | <b>632</b> | <b>11.5</b> | <b>756</b> | <b>12.7</b> | <b>536</b> | <b>13.6</b> | <b>126</b> | <b>18.7</b> |

<sup>1</sup> Probability weights are incorporated to account for differences in the probability of a woman being selected for inclusion in the study arising from differences in each unit/trust's period of participation and the stratum specific probabilities of selection of OUs.

Table S4 Sample size of low risk women aged 40 and over by planned place of birth and parity

| Age (years)  | Nulliparous women |           |           |           | Multiparous women |            |            |            |
|--------------|-------------------|-----------|-----------|-----------|-------------------|------------|------------|------------|
|              | OU                | AMU       | FMU       | Home      | OU                | AMU        | FMU        | Home       |
| 40           | 64                | 32        | 24        | 38        | 157               | 103        | 93         | 242        |
| 41           | 31                | 17        | 11        | 26        | 86                | 63         | 47         | 147        |
| 42           | 24                | 6         | 3         | 13        | 53                | 39         | 25         | 83         |
| 43           | 12                | 1         | 2         | 10        | 29                | 18         | 22         | 37         |
| 44           | 14                | 0         | 4         | 4         | 12                | 10         | 10         | 23         |
| 45           | 2                 | 0         | 3         | 2         | 4                 | 4          | 2          | 9          |
| 46           | 1                 | 0         | 0         | 1         | 5                 | 1          | 1          | 5          |
| 47           | 0                 | 0         | 0         | 0         | 1                 | 0          | 1          | 0          |
| 48           | 0                 | 0         | 0         | 0         | 1                 | 0          | 0          | 0          |
| 49           | 0                 | 0         | 0         | 0         | 0                 | 0          | 1          | 0          |
| 50           | 1                 | 0         | 0         | 0         | 0                 | 0          | 0          | 0          |
| 51           | 0                 | 0         | 0         | 0         | 0                 | 0          | 0          | 0          |
| 52           | 0                 | 0         | 0         | 0         | 0                 | 0          | 0          | 1          |
| <b>Total</b> | <b>149</b>        | <b>56</b> | <b>47</b> | <b>94</b> | <b>348</b>        | <b>238</b> | <b>202</b> | <b>547</b> |



**Table S5 Less common intrapartum interventions and adverse maternal outcomes by maternal age in low risk nulliparous women aged 16 and over**

| Age (years)                                               | OU                       |                                     | Non-OU                   |                                     |
|-----------------------------------------------------------|--------------------------|-------------------------------------|--------------------------|-------------------------------------|
|                                                           | Events/<br>Births<br>n/N | Weighted <sup>‡</sup><br>% (95% CI) | Events/<br>Births<br>n/N | Weighted <sup>‡</sup><br>% (95% CI) |
| <b>General anaesthesia</b>                                |                          |                                     |                          |                                     |
| 16-19                                                     | 17/1251                  | 1.4 (0.8-2.4)                       | 14/1562                  | 0.8 (0.4-1.5)                       |
| 20-24                                                     | 47/2587                  | 1.8 (1.4-2.4)                       | 31/3698                  | 0.9 (0.6-1.4)                       |
| 25-29                                                     | 58/2984                  | 1.9 (1.5-2.5)                       | 41/5349                  | 0.8 (0.5-1.3)                       |
| 30-34                                                     | 44/2312                  | 1.8 (1.3-2.7)                       | 57/4900                  | 1.3 (0.9-1.9)                       |
| 35-39                                                     | 20/949                   | 2.0 (1.2-3.5)                       | 16/2001                  | 0.9 (0.4-1.9)                       |
| 40+                                                       | 5/143                    | 3.0 (1.2-7.6)                       | 2/195                    | 0.6 (0.1-2.5)                       |
| Total                                                     | 191/10226                | 1.9 (1.5-2.3)                       | 161/17705                | 1.0 (0.8-1.2)                       |
| <b>Maternal blood transfusion</b>                         |                          |                                     |                          |                                     |
| 16-19                                                     | 13/1260                  | 1.1 (0.7-1.9)                       | 10/1555                  | 0.6 (0.3-1.2)                       |
| 20-24                                                     | 47/2606                  | 1.8 (1.4-2.5)                       | 29/3697                  | 0.8 (0.6-1.2)                       |
| 25-29                                                     | 57/3024                  | 1.8 (1.2-2.6)                       | 54/5359                  | 1.0 (0.8-1.3)                       |
| 30-34                                                     | 27/2335                  | 1.2 (0.8-1.8)                       | 64/4923                  | 1.7 (1.2-2.5)                       |
| 35-39                                                     | 21/961                   | 2.3 (1.3-3.9)                       | 21/2002                  | 1.2 (0.7-2.1)                       |
| 40+                                                       | 4/149                    | 2.8 (1.1-6.8)                       | 5/196                    | 1.6 (0.5-4.6)                       |
| Total                                                     | 169/10335                | 1.6 (1.3-2.0)                       | 183/17732                | 1.1 (1.0-1.4)                       |
| <b>3<sup>rd</sup>/4<sup>th</sup> degree perineal tear</b> |                          |                                     |                          |                                     |
| 16-19                                                     | 25/1259                  | 2.0 (1.2-3.2)                       | 30/1567                  | 1.9 (1.2-2.8)                       |
| 20-24                                                     | 107/2609                 | 4.1 (3.3-5.3)                       | 118/3709                 | 3.2 (2.5-4.1)                       |
| 25-29                                                     | 153/3030                 | 4.8 (3.9-5.8)                       | 274/5389                 | 5.4 (4.7-6.3)                       |
| 30-34                                                     | 121/2343                 | 5.1 (4.3-6.1)                       | 267/4942                 | 5.8 (5.0-6.7)                       |
| 35-39                                                     | 49/968                   | 5.0 (3.4-7.2)                       | 85/2007                  | 4.1 (3.2-5.2)                       |
| 40+                                                       | 9/149                    | 5.3 (2.9-9.6)                       | 17/196                   | 11.1 (5.0-22.7)                     |
| Total                                                     | 464/10358                | 4.4 (3.8-5.1)                       | 791/17810                | 4.6 (4.1-5.2)                       |
| <b>Maternal admission for higher level care</b>           |                          |                                     |                          |                                     |
| 16-19                                                     | 9/1266                   | 0.7 (0.3-1.6)                       | 5/1569                   | 0.3 (0.1-0.8)                       |
| 20-24                                                     | 18/2620                  | 0.7 (0.4-1.2)                       | 22/3721                  | 0.8 (0.4-1.5)                       |
| 25-29                                                     | 22/3043                  | 0.7 (0.4-1.3)                       | 24/5395                  | 0.7 (0.4-1.3)                       |
| 30-34                                                     | 16/2351                  | 0.7 (0.4-1.3)                       | 31/4956                  | 1.3 (0.5-3.1)                       |
| 35-39                                                     | 14/968                   | 1.9 (0.7-4.8)                       | 10/2021                  | 0.5 (0.2-1.1)                       |
| 40+                                                       | 2/149                    | 1.5 (0.3-6.8)                       | 0/197                    | 0 -                                 |
| Total                                                     | 81/10397                 | 0.8 (0.5-1.4)                       | 92/17859                 | 0.8 (0.4-1.5)                       |

<sup>‡</sup>Probability weights are incorporated to account for differences in the probability of a woman being selected for inclusion in the study arising from differences in each unit/trust's period of participation and the stratum specific probabilities of selection of OUs.

**Table S6 Less common intrapartum interventions and adverse maternal outcomes by maternal age in low risk multiparous women aged 16 and over**

| Age (years)                                               | OU                     |                                     | Non-OU                 |                                     |
|-----------------------------------------------------------|------------------------|-------------------------------------|------------------------|-------------------------------------|
|                                                           | Events / Births<br>n/N | Weighted <sup>‡</sup><br>% (95% CI) | Events / Births<br>n/N | Weighted <sup>‡</sup><br>% (95% CI) |
| <b>General anaesthesia</b>                                |                        |                                     |                        |                                     |
| 16-19                                                     | 1/177                  | 0.7 (0.1-4.3)                       | 1/339                  | 0.5 (0.1-3.6)                       |
| 20-24                                                     | 15/1516                | 1.0 (0.6-1.7)                       | 15/3518                | 0.4 (0.2-0.8)                       |
| 25-29                                                     | 19/2528                | 0.8 (0.5-1.2)                       | 18/7072                | 0.3 (0.1-0.5)                       |
| 30-34                                                     | 21/2569                | 0.8 (0.5-1.3)                       | 17/8526                | 0.2 (0.1-0.4)                       |
| 35-39                                                     | 19/1584                | 1.1 (0.7-1.7)                       | 16/5790                | 0.3 (0.1-0.5)                       |
| 40+                                                       | 9/343                  | 2.6 (1.5-4.6)                       | 5/985                  | 0.5 (0.2-1.6)                       |
| Total                                                     | 84/8717                | 0.9 (0.7-1.2)                       | 72/26230               | 0.3 (0.2-0.4)                       |
| <b>Maternal blood transfusion</b>                         |                        |                                     |                        |                                     |
| 16-19                                                     | 3/179                  | 1.7 (0.4-6.4)                       | 1/339                  | 0.5 (0.1-3.6)                       |
| 20-24                                                     | 6/1519                 | 0.4 (0.2-0.9)                       | 15/3495                | 0.5 (0.2-0.9)                       |
| 25-29                                                     | 16/2544                | 0.6 (0.3-1.0)                       | 26/7024                | 0.4 (0.3-0.6)                       |
| 30-34                                                     | 23/2575                | 0.9 (0.5-1.6)                       | 35/8478                | 0.4 (0.3-0.5)                       |
| 35-39                                                     | 11/1593                | 0.6 (0.3-1.1)                       | 30/5759                | 0.6 (0.4-1.0)                       |
| 40+                                                       | 7/345                  | 2.2 (1.1-4.3)                       | 6/979                  | 0.8 (0.3-1.8)                       |
| Total                                                     | 66/8755                | 0.7 (0.6-1.0)                       | 113/26074              | 0.5 (0.4-0.6)                       |
| <b>3<sup>rd</sup>/4<sup>th</sup> degree perineal tear</b> |                        |                                     |                        |                                     |
| 16-19                                                     | 5/179                  | 2.7 (1.2-5.9)                       | 4/340                  | 0.9 (0.3-2.4)                       |
| 20-24                                                     | 15/1529                | 1.1 (0.6-1.8)                       | 29/3518                | 1.0 (0.7-1.4)                       |
| 25-29                                                     | 44/2550                | 1.8 (1.3-2.3)                       | 60/7075                | 1.0 (0.7-1.3)                       |
| 30-34                                                     | 42/2588                | 1.6 (1.1-2.3)                       | 123/8531               | 1.6 (1.3-2.1)                       |
| 35-39                                                     | 32/1600                | 2.0 (1.3-3.1)                       | 71/5792                | 1.3 (1.0-1.7)                       |
| 40+                                                       | 5/345                  | 1.4 (0.6-3.3)                       | 12/985                 | 1.2 (0.6-2.2)                       |
| Total                                                     | 143/8791               | 1.7 (1.3-2.1)                       | 299/26241              | 1.3 (1.1-1.5)                       |
| <b>Maternal admission for higher level care</b>           |                        |                                     |                        |                                     |
| 16-19                                                     | 1/179                  | 0.5 (0.1-3.6)                       | 1/340                  | 0.5 (0.1-3.6)                       |
| 20-24                                                     | 1/1530                 | 0.1 (0.0-0.5)                       | 8/3524                 | 0.2 (0.1-0.5)                       |
| 25-29                                                     | 9/2558                 | 0.3 (0.2-0.7)                       | 17/7095                | 0.3 (0.2-0.5)                       |
| 30-34                                                     | 13/2595                | 0.5 (0.2-1.1)                       | 22/8551                | 0.3 (0.2-0.5)                       |
| 35-39                                                     | 4/1603                 | 0.3 (0.1-0.7)                       | 16/5805                | 0.3 (0.2-0.5)                       |
| 40+                                                       | 4/348                  | 1.2 (0.5-3.1)                       | 7/987                  | 0.7 (0.3-1.6)                       |
| Total                                                     | 32/8813                | 0.4 (0.2-0.6)                       | 71/26302               | 0.3 (0.2-0.4)                       |

<sup>‡</sup>Probability weights are incorporated to account for differences in the probability of a woman being selected for inclusion in the study arising from differences in each unit/trust's period of participation and the stratum specific probabilities of selection of OUs.

**Table S7-S5 Association between maternal age and intrapartum interventions and adverse maternal outcomes in low risk women aged between 16 and 40 years old (inclusive) additionally adjusted for complicating conditions**

|                                                       | Nulliparous women         |               | Multiparous women         |              |
|-------------------------------------------------------|---------------------------|---------------|---------------------------|--------------|
|                                                       | Adjusted <sup>1</sup>     |               | Adjusted <sup>1</sup>     |              |
|                                                       | RR                        | (95% CI)      | RR                        | (95% CI)     |
| Maternal composite                                    | 1.12                      | (1.09-1.15)   | 1.07                      | (1.02-1.12)  |
| OU <sup>2</sup>                                       | 1.11                      | (1.08-1.14)   |                           |              |
| Non-OU <sup>2</sup>                                   | 1.21                      | (1.18-1.24)   |                           |              |
|                                                       | Wald test for interaction | $P^3 < 0.001$ | Wald test for interaction | $P^3 = 0.50$ |
| Augmentation                                          | 1.11                      | (1.06-1.15)   | 0.98                      | (0.90-1.07)  |
| OU <sup>2</sup>                                       | 1.10                      | (1.05-1.15)   |                           |              |
| Non-OU <sup>2</sup>                                   | 1.22                      | (1.17-1.28)   |                           |              |
|                                                       | Wald test for interaction | $P^3 < 0.001$ | Wald test for interaction | $P^3 = 0.33$ |
| Instrumental delivery                                 | 1.18                      | (1.11-1.25)   | 1.14                      | (1.04-1.25)  |
|                                                       | Wald test for interaction | $P^3 = 0.17$  | Wald test for interaction | $P^3 = 0.08$ |
| Intrapartum caesarean section                         | 1.25                      | (1.20-1.30)   | 1.13                      | (1.03-1.23)  |
|                                                       | Wald test for interaction | $P^3 = 0.12$  | Wald test for interaction | $P^3 = 0.40$ |
| General anaesthesia                                   | 1.04                      | (0.91-1.19)   | 1.07                      | (0.89-1.29)  |
|                                                       | Wald test for interaction | $P^3 = 0.71$  | Wald test for interaction | $P^3 = 0.17$ |
| Maternal blood transfusion                            | 1.13                      | (0.95-1.33)   | 1.21                      | (0.93-1.59)  |
|                                                       | Wald test for interaction | $P^3 = 0.38$  | Wald test for interaction | $P^3 = 0.50$ |
| 3 <sup>rd</sup> /4 <sup>th</sup> degree perineal tear | 1.12                      | (1.02-1.23)   | 1.01                      | (0.89-1.15)  |
|                                                       | Wald test for interaction | $P^3 = 0.41$  | Wald test for interaction | $P^3 = 0.30$ |
| Maternal admission for higher level care              | 1.45                      | (1.07-1.96)   | 1.47                      | (1.04-2.08)  |
|                                                       | Wald test for interaction | $P^3 = 0.43$  | Wald test for interaction | $P^3 = 0.16$ |
| Neonatal composite                                    | 1.04                      | (0.94-1.16)   | 0.97                      | (0.83-1.13)  |
|                                                       | Wald test for interaction | $P^3 = 0.78$  | Wald test for interaction | $P^3 = 0.66$ |

<sup>1</sup> Probability weights are incorporated to account for differences in the probability of a woman being selected for inclusion in the study arising from differences in each unit/trust's period of participation and the stratum specific probabilities of selection of OUs. Models were adjusted for ethnic group, understanding of English, marital/partner status, BMI in pregnancy, index of multiple deprivation score quintile, gestation at delivery, planned place of birth (OU/AMU/FMU/home), and complicating conditions identified at the start of care in labour.

<sup>2</sup> Results in these rows were weighted and adjusted as in footnote 1, with the exception of planned place of birth.

<sup>3</sup>  $P$  for interaction, results in these rows were weighted and adjusted as in footnote 1 except that planned place of birth was included as a binary variable (OU vs. non-OU).

**Table S5-S6** Less common intrapartum interventions and adverse maternal outcomes by maternal age in low risk nulliparous women aged 16 and over

| Age (years)                                               | OU                     |                                     |  | Non-OU                 |                                     |  |
|-----------------------------------------------------------|------------------------|-------------------------------------|--|------------------------|-------------------------------------|--|
|                                                           | Events / Births<br>n/N | Weighted <sup>1</sup><br>% (95% CI) |  | Events / Births<br>n/N | Weighted <sup>1</sup><br>% (95% CI) |  |
| <b>General anaesthesia</b>                                |                        |                                     |  |                        |                                     |  |
| 16-19                                                     | 17/1251                | 1.4 (0.8-2.4)                       |  | 14/1562                | 0.8 (0.4-1.5)                       |  |
| 20-24                                                     | 47/2587                | 1.8 (1.4-2.4)                       |  | 31/3698                | 0.9 (0.6-1.4)                       |  |
| 25-29                                                     | 58/2984                | 1.9 (1.5-2.5)                       |  | 41/5349                | 0.8 (0.5-1.3)                       |  |
| 30-34                                                     | 44/2312                | 1.8 (1.3-2.7)                       |  | 57/4900                | 1.3 (0.9-1.9)                       |  |
| 35-39                                                     | 20/949                 | 2.0 (1.2-3.5)                       |  | 16/2001                | 0.9 (0.4-1.9)                       |  |
| 40+                                                       | 5/143                  | 3.0 (1.2-7.6)                       |  | 2/195                  | 0.6 (0.1-2.5)                       |  |
| Total                                                     | 191/10226              | 1.9 (1.5-2.3)                       |  | 161/17705              | 1.0 (0.8-1.2)                       |  |
| <b>Maternal blood transfusion</b>                         |                        |                                     |  |                        |                                     |  |
| 16-19                                                     | 13/1260                | 1.1 (0.7-1.9)                       |  | 10/1555                | 0.6 (0.3-1.2)                       |  |
| 20-24                                                     | 47/2606                | 1.8 (1.4-2.5)                       |  | 29/3697                | 0.8 (0.6-1.2)                       |  |
| 25-29                                                     | 57/3024                | 1.8 (1.2-2.6)                       |  | 54/5359                | 1.0 (0.8-1.3)                       |  |
| 30-34                                                     | 27/2335                | 1.2 (0.8-1.8)                       |  | 64/4923                | 1.7 (1.2-2.5)                       |  |
| 35-39                                                     | 21/961                 | 2.3 (1.3-3.9)                       |  | 21/2002                | 1.2 (0.7-2.1)                       |  |
| 40+                                                       | 4/149                  | 2.8 (1.1-6.8)                       |  | 5/196                  | 1.6 (0.5-4.6)                       |  |
| Total                                                     | 169/10335              | 1.6 (1.3-2.0)                       |  | 183/17732              | 1.1 (1.0-1.4)                       |  |
| <b>3<sup>rd</sup>/4<sup>th</sup> degree perineal tear</b> |                        |                                     |  |                        |                                     |  |
| 16-19                                                     | 25/1259                | 2.0 (1.2-3.2)                       |  | 30/1567                | 1.9 (1.2-2.8)                       |  |
| 20-24                                                     | 107/2609               | 4.1 (3.3-5.3)                       |  | 118/3709               | 3.2 (2.5-4.1)                       |  |
| 25-29                                                     | 153/3030               | 4.8 (3.9-5.8)                       |  | 274/5389               | 5.4 (4.7-6.3)                       |  |
| 30-34                                                     | 121/2343               | 5.1 (4.3-6.1)                       |  | 267/4942               | 5.8 (5.0-6.7)                       |  |
| 35-39                                                     | 49/968                 | 5.0 (3.4-7.2)                       |  | 85/2007                | 4.1 (3.2-5.2)                       |  |
| 40+                                                       | 9/149                  | 5.3 (2.9-9.6)                       |  | 17/196                 | 11.1 (5.0-22.7)                     |  |
| Total                                                     | 464/10358              | 4.4 (3.8-5.1)                       |  | 791/17810              | 4.6 (4.1-5.2)                       |  |
| <b>Maternal admission for higher level care</b>           |                        |                                     |  |                        |                                     |  |
| 16-19                                                     | 9/1266                 | 0.7 (0.3-1.6)                       |  | 5/1569                 | 0.3 (0.1-0.8)                       |  |
| 20-24                                                     | 18/2620                | 0.7 (0.4-1.2)                       |  | 22/3721                | 0.8 (0.4-1.5)                       |  |
| 25-29                                                     | 22/3043                | 0.7 (0.4-1.3)                       |  | 24/5395                | 0.7 (0.4-1.3)                       |  |
| 30-34                                                     | 16/2351                | 0.7 (0.4-1.3)                       |  | 31/4956                | 1.3 (0.5-3.1)                       |  |
| 35-39                                                     | 14/968                 | 1.9 (0.7-4.8)                       |  | 10/2021                | 0.5 (0.2-1.1)                       |  |
| 40+                                                       | 2/149                  | 1.5 (0.3-6.8)                       |  | 0/197                  | 0 -                                 |  |
| Total                                                     | 81/10397               | 0.8 (0.5-1.4)                       |  | 92/17859               | 0.8 (0.4-1.5)                       |  |

<sup>1</sup>Probability weights are incorporated to account for differences in the probability of a woman being selected for inclusion in the study arising from differences in each unit/trust's period of participation and the stratum specific probabilities of selection of OUs.

**Table S6-S7 Less common intrapartum interventions and adverse maternal outcomes by maternal age in low risk multiparous women aged 16 and over**

| Age (years)                                               | Events / Births<br>n/N | OU                         |           | Events / Births<br>n/N | Non-OU                     |           |
|-----------------------------------------------------------|------------------------|----------------------------|-----------|------------------------|----------------------------|-----------|
|                                                           |                        | Weighted <sup>1</sup><br>% | (95% CI)  |                        | Weighted <sup>1</sup><br>% | (95% CI)  |
| <b>General anaesthesia</b>                                |                        |                            |           |                        |                            |           |
| 16-19                                                     | 1/177                  | 0.7                        | (0.1-4.3) | 1/339                  | 0.5                        | (0.1-3.6) |
| 20-24                                                     | 15/1516                | 1.0                        | (0.6-1.7) | 15/3518                | 0.4                        | (0.2-0.8) |
| 25-29                                                     | 19/2528                | 0.8                        | (0.5-1.2) | 18/7072                | 0.3                        | (0.1-0.5) |
| 30-34                                                     | 21/2569                | 0.8                        | (0.5-1.3) | 17/8526                | 0.2                        | (0.1-0.4) |
| 35-39                                                     | 19/1584                | 1.1                        | (0.7-1.7) | 16/5790                | 0.3                        | (0.1-0.5) |
| 40+                                                       | 9/343                  | 2.6                        | (1.5-4.6) | 5/985                  | 0.5                        | (0.2-1.6) |
| Total                                                     | 84/8717                | 0.9                        | (0.7-1.2) | 72/26230               | 0.3                        | (0.2-0.4) |
| <b>Maternal blood transfusion</b>                         |                        |                            |           |                        |                            |           |
| 16-19                                                     | 3/179                  | 1.7                        | (0.4-6.4) | 1/339                  | 0.5                        | (0.1-3.6) |
| 20-24                                                     | 6/1519                 | 0.4                        | (0.2-0.9) | 15/3495                | 0.5                        | (0.2-0.9) |
| 25-29                                                     | 16/2544                | 0.6                        | (0.3-1.0) | 26/7024                | 0.4                        | (0.3-0.6) |
| 30-34                                                     | 23/2575                | 0.9                        | (0.5-1.6) | 35/8478                | 0.4                        | (0.3-0.5) |
| 35-39                                                     | 11/1593                | 0.6                        | (0.3-1.1) | 30/5759                | 0.6                        | (0.4-1.0) |
| 40+                                                       | 7/345                  | 2.2                        | (1.1-4.3) | 6/979                  | 0.8                        | (0.3-1.8) |
| Total                                                     | 66/8755                | 0.7                        | (0.6-1.0) | 113/26074              | 0.5                        | (0.4-0.6) |
| <b>3<sup>rd</sup>/4<sup>th</sup> degree perineal tear</b> |                        |                            |           |                        |                            |           |
| 16-19                                                     | 5/179                  | 2.7                        | (1.2-5.9) | 4/340                  | 0.9                        | (0.3-2.4) |
| 20-24                                                     | 15/1529                | 1.1                        | (0.6-1.8) | 29/3518                | 1.0                        | (0.7-1.4) |
| 25-29                                                     | 44/2550                | 1.8                        | (1.3-2.3) | 60/7075                | 1.0                        | (0.7-1.3) |
| 30-34                                                     | 42/2588                | 1.6                        | (1.1-2.3) | 123/8531               | 1.6                        | (1.3-2.1) |
| 35-39                                                     | 32/1600                | 2.0                        | (1.3-3.1) | 71/5792                | 1.3                        | (1.0-1.7) |
| 40+                                                       | 5/345                  | 1.4                        | (0.6-3.3) | 12/985                 | 1.2                        | (0.6-2.2) |
| Total                                                     | 143/8791               | 1.7                        | (1.3-2.1) | 299/26241              | 1.3                        | (1.1-1.5) |
| <b>Maternal admission for higher level care</b>           |                        |                            |           |                        |                            |           |
| 16-19                                                     | 1/179                  | 0.5                        | (0.1-3.6) | 1/340                  | 0.5                        | (0.1-3.6) |
| 20-24                                                     | 1/1530                 | 0.1                        | (0.0-0.5) | 8/3524                 | 0.2                        | (0.1-0.5) |
| 25-29                                                     | 9/2558                 | 0.3                        | (0.2-0.7) | 17/7095                | 0.3                        | (0.2-0.5) |
| 30-34                                                     | 13/2595                | 0.5                        | (0.2-1.1) | 22/8551                | 0.3                        | (0.2-0.5) |
| 35-39                                                     | 4/1603                 | 0.3                        | (0.1-0.7) | 16/5805                | 0.3                        | (0.2-0.5) |
| 40+                                                       | 4/348                  | 1.2                        | (0.5-3.1) | 7/987                  | 0.7                        | (0.3-1.6) |
| Total                                                     | 32/8813                | 0.4                        | (0.2-0.6) | 71/26302               | 0.3                        | (0.2-0.4) |

<sup>1</sup> Probability weights are incorporated to account for differences in the probability of a woman being selected for inclusion in the study arising from differences in each unit/trust's period of participation and the stratum specific probabilities of selection of OUs.

**Table S8 Event rates in restricted sample of nulliparous women aged 16 and over without complicating conditions identified at the start of care in labour**

| Age (years)                          | OU                     |                                     | Non-OU                 |                                     |
|--------------------------------------|------------------------|-------------------------------------|------------------------|-------------------------------------|
|                                      | Events / Births<br>n/N | Weighted <sup>1</sup><br>% (95% CI) | Events / Births<br>n/N | Weighted <sup>1</sup><br>% (95% CI) |
| <b>Maternal composite</b>            |                        |                                     |                        |                                     |
| 16-19                                | 335/985                | 34.4 (30.9-38.1)                    | 221/1418               | 16.9 (14.6-19.4)                    |
| 20-24                                | 861/2039               | 42.3 (38.9-45.9)                    | 768/3382               | 22.7 (20.6-25.0)                    |
| 25-29                                | 1160/2302              | 50.1 (47.4-52.7)                    | 1453/4929              | 30.2 (27.5-33.0)                    |
| 30-34                                | 902/1680               | 54.5 (49.8-59.1)                    | 1524/4442              | 35.4 (33.2-37.6)                    |
| 35-39                                | 391/680                | 57.7 (53.4-62.0)                    | 685/1800               | 38.0 (34.3-41.9)                    |
| 40+                                  | 67/98                  | 66.1 (53.7-76.6)                    | 70/173                 | 42.4 (32.9-52.5)                    |
| Total                                | 3716/7784              | 48.1 (45.5-50.8)                    | 4721/16144             | 29.7 (27.8-31.6)                    |
| <b>Augmentation</b>                  |                        |                                     |                        |                                     |
| 16-19                                | 224/991                | 23.0 (19.9-26.4)                    | 119/1428               | 8.0 (6.5-9.9)                       |
| 20-24                                | 527/2044               | 25.8 (22.0-30.0)                    | 417/3406               | 12.0 (10.5-13.8)                    |
| 25-29                                | 701/2305               | 30.0 (27.5-32.6)                    | 777/4944               | 15.8 (14.1-17.7)                    |
| 30-34                                | 523/1678               | 31.4 (27.5-35.6)                    | 838/4462               | 18.8 (17.2-20.5)                    |
| 35-39                                | 239/676                | 34.8 (28.3-42.0)                    | 402/1817               | 21.1 (18.2-24.3)                    |
| 40+                                  | 41/99                  | 40.2 (27.9-53.9)                    | 37/173                 | 22.6 (14.3-33.8)                    |
| Total                                | 2255/7793              | 29.0 (26.2-32.0)                    | 2590/16230             | 15.7 (14.5-16.9)                    |
| <b>Instrumental delivery</b>         |                        |                                     |                        |                                     |
| 16-19                                | 139/1008               | 13.6 (10.8-16.9)                    | 92/1432                | 8.2 (6.4-10.5)                      |
| 20-24                                | 354/2073               | 17.0 (14.9-19.4)                    | 350/3418               | 10.0 (8.5-11.8)                     |
| 25-29                                | 512/2328               | 22.2 (19.9-24.6)                    | 672/4962               | 14.0 (12.2-16.0)                    |
| 30-34                                | 411/1700               | 25.3 (20.0-31.4)                    | 713/4487               | 16.8 (15.0-18.9)                    |
| 35-39                                | 191/686                | 28.9 (24.2-34.1)                    | 353/1819               | 19.3 (15.8-23.4)                    |
| 40+                                  | 26/99                  | 26.9 (17.8-38.5)                    | 31/174                 | 20.7 (12.8-31.6)                    |
| Total                                | 1633/7894              | 21.2 (18.7-23.9)                    | 2211/16292             | 14.0 (12.6-15.5)                    |
| <b>Intrapartum caesarean section</b> |                        |                                     |                        |                                     |
| 16-19                                | 65/1008                | 6.8 (4.9-9.4)                       | 45/1432                | 2.7 (2.0-3.7)                       |
| 20-24                                | 194/2073               | 9.4 (7.8-11.3)                      | 156/3418               | 4.6 (3.6-5.8)                       |
| 25-29                                | 308/2328               | 13.0 (11.2-15.1)                    | 343/4962               | 7.3 (6.3-8.5)                       |
| 30-34                                | 267/1700               | 15.8 (13.2-18.9)                    | 382/4487               | 8.3 (7.2-9.6)                       |
| 35-39                                | 125/686                | 18.3 (13.9-23.9)                    | 177/1819               | 10.1 (8.1-12.5)                     |
| 40+                                  | 27/99                  | 25.6 (16.1-38.2)                    | 18/174                 | 8.8 (4.8-15.4)                      |
| Total                                | 986/7894               | 12.6 (11.0-14.5)                    | 1121/16292             | 6.9 (6.2-7.6)                       |
| <b>Perinatal composite</b>           |                        |                                     |                        |                                     |
| 16-19                                | 26/1003                | 2.6 (1.8-3.8)                       | 23/1419                | 2.5 (1.6-4.0)                       |
| 20-24                                | 58/2064                | 2.9 (1.9-4.3)                       | 87/3402                | 2.4 (1.9-3.1)                       |
| 25-29                                | 57/2319                | 2.7 (2.0-3.5)                       | 104/4932               | 2.0 (1.5-2.6)                       |
| 30-34                                | 67/1694                | 3.7 (2.6-5.2)                       | 108/4459               | 2.9 (2.1-4.0)                       |
| 35-39                                | 14/682                 | 1.8 (1.0-3.4)                       | 56/1804                | 2.5 (1.8-3.4)                       |
| 40+                                  | 7/99                   | 7.8 (3.8-15.6)                      | 4/172                  | 2.1 (0.5-8.5)                       |
| Total                                | 229/7861               | 2.9 (2.3-3.7)                       | 382/16188              | 2.4 (2.0-2.9)                       |

<sup>1</sup> Probability weights are incorporated to account for differences in the probability of a woman being selected for inclusion in the study arising from differences in each unit/trust's period of participation and the stratum specific probabilities of selection of OUs.

**Table S9 Event rates in restricted sample of multiparous women aged 16 and over without complicating conditions identified at the start of care in labour**

| Age (years)                          | OU                     |                                     |  | Non-OU                 |                                     |  |
|--------------------------------------|------------------------|-------------------------------------|--|------------------------|-------------------------------------|--|
|                                      | Events / Births<br>n/N | Weighted <sup>1</sup><br>% (95% CI) |  | Events / Births<br>n/N | Weighted <sup>1</sup><br>% (95% CI) |  |
| <b>Maternal composite</b>            |                        |                                     |  |                        |                                     |  |
| 16-19                                | 23/149                 | 14.2 (8.7-22.1)                     |  | 18/323                 | 6.2 (3.8-10.0)                      |  |
| 20-24                                | 183/1311               | 14.1 (11.9-16.8)                    |  | 130/3320               | 4.3 (3.4-5.5)                       |  |
| 25-29                                | 334/2159               | 15.5 (13.8-17.3)                    |  | 272/6663               | 4.7 (3.9-5.6)                       |  |
| 30-34                                | 342/2155               | 15.7 (13.3-18.5)                    |  | 376/8033               | 5.1 (4.4-5.9)                       |  |
| 35-39                                | 232/1316               | 17.8 (15.4-20.3)                    |  | 242/5421               | 5.3 (4.5-6.2)                       |  |
| 40+                                  | 54/265                 | 20.3 (16.4-24.8)                    |  | 55/917                 | 6.8 (5.1-9.1)                       |  |
| Total                                | 1168/7355              | 15.9 (14.2-17.8)                    |  | 1093/24677             | 5.0 (4.5-5.6)                       |  |
| <b>Augmentation</b>                  |                        |                                     |  |                        |                                     |  |
| 16-19                                | 11/150                 | 6.8 (3.5-12.8)                      |  | 9/324                  | 3.2 (1.7-6.0)                       |  |
| 20-24                                | 101/1321               | 7.6 (6.0-9.6)                       |  | 53/3352                | 1.8 (1.3-2.5)                       |  |
| 25-29                                | 155/2179               | 7.2 (5.7-9.0)                       |  | 94/6743                | 1.6 (1.2-2.1)                       |  |
| 30-34                                | 165/2175               | 7.5 (5.9-9.6)                       |  | 112/8118               | 1.5 (1.2-1.9)                       |  |
| 35-39                                | 93/1331                | 6.9 (5.5-8.7)                       |  | 80/5476                | 1.7 (1.2-2.3)                       |  |
| 40+                                  | 22/268                 | 8.3 (5.0-13.3)                      |  | 12/927                 | 1.2 (0.6-2.3)                       |  |
| Total                                | 547/7424               | 7.3 (6.1-8.8)                       |  | 360/24940              | 1.6 (1.4-1.9)                       |  |
| <b>Instrumental delivery</b>         |                        |                                     |  |                        |                                     |  |
| 16-19                                | 7/151                  | 4.2 (1.9-9.1)                       |  | 7/324                  | 3.3 (1.4-7.4)                       |  |
| 20-24                                | 45/1334                | 3.4 (2.4-4.8)                       |  | 33/3352                | 1.3 (0.9-1.9)                       |  |
| 25-29                                | 111/2205               | 5.1 (4.3-6.0)                       |  | 95/6757                | 1.7 (1.3-2.3)                       |  |
| 30-34                                | 126/2194               | 5.8 (4.7-7.1)                       |  | 119/8126               | 1.6 (1.2-2.0)                       |  |
| 35-39                                | 80/1338                | 6.1 (4.7-8.0)                       |  | 73/5482                | 1.7 (1.3-2.3)                       |  |
| 40+                                  | 20/269                 | 7.2 (4.5-11.3)                      |  | 15/929                 | 2.3 (1.1-4.9)                       |  |
| Total                                | 389/7491               | 5.3 (4.5-6.2)                       |  | 342/24970              | 1.7 (1.4-2.0)                       |  |
| <b>Intrapartum caesarean section</b> |                        |                                     |  |                        |                                     |  |
| 16-19                                | 4/151                  | 2.5 (0.9-7.2)                       |  | 4/324                  | 1.0 (0.3-2.7)                       |  |
| 20-24                                | 48/1334                | 3.6 (2.2-6.1)                       |  | 17/3352                | 0.5 (0.2-1.0)                       |  |
| 25-29                                | 79/2205                | 3.6 (2.7-4.7)                       |  | 42/6757                | 0.6 (0.4-0.9)                       |  |
| 30-34                                | 80/2194                | 3.6 (2.6-4.9)                       |  | 54/8126                | 0.7 (0.5-1.1)                       |  |
| 35-39                                | 64/1338                | 4.8 (3.4-6.7)                       |  | 41/5482                | 0.9 (0.6-1.4)                       |  |
| 40+                                  | 11/269                 | 4.0 (2.2-7.4)                       |  | 14/929                 | 1.4 (0.7-2.6)                       |  |
| Total                                | 286/7491               | 3.8 (2.9-5.0)                       |  | 172/24970              | 0.7 (0.6-0.9)                       |  |
| <b>Perinatal composite</b>           |                        |                                     |  |                        |                                     |  |
| 16-19                                | 4/151                  | 2.2 (0.8-5.7)                       |  | 4/322                  | 1.5 (0.5-4.5)                       |  |
| 20-24                                | 19/1325                | 1.5 (0.9-2.5)                       |  | 39/3323                | 1.2 (0.8-1.7)                       |  |
| 25-29                                | 34/2199                | 1.6 (1.1-2.2)                       |  | 61/6701                | 1.0 (0.7-1.6)                       |  |
| 30-34                                | 30/2182                | 1.4 (0.9-2.0)                       |  | 97/8058                | 1.1 (0.9-1.4)                       |  |
| 35-39                                | 26/1334                | 2.0 (1.2-3.4)                       |  | 82/5445                | 1.6 (1.2-2.1)                       |  |
| 40+                                  | 6/268                  | 2.2 (0.9-5.1)                       |  | 17/920                 | 2.1 (1.1-4.0)                       |  |
| Total                                | 119/7459               | 1.6 (1.2-2.1)                       |  | 300/24769              | 1.2 (1.0-1.5)                       |  |

<sup>1</sup> Probability weights are incorporated to account for differences in the probability of a woman being selected for inclusion in the study arising from differences in each unit/trust's period of participation and the stratum specific probabilities of selection of OUs.

**Table S10 Relative risk for non-OU compared to OU by age groups in nulliparous women without complicating conditions**

| <u>Age (years)</u>               | <u>Unadjusted RR<sup>1</sup> (95% CI)</u> | <u>Adjusted RR<sup>1,2</sup> (95% CI)</u> |
|----------------------------------|-------------------------------------------|-------------------------------------------|
| <b><u>Maternal composite</u></b> |                                           |                                           |
| <u>16-19</u>                     | <u>0.49 (0.41-0.59)</u>                   | <u>0.52 (0.43-0.62)</u>                   |
| <u>20-24</u>                     | <u>0.54 (0.47-0.61)</u>                   | <u>0.54 (0.48-0.61)</u>                   |
| <u>25-29</u>                     | <u>0.60 (0.54-0.67)</u>                   | <u>0.61 (0.55-0.68)</u>                   |
| <u>30-34</u>                     | <u>0.65 (0.58-0.72)</u>                   | <u>0.67 (0.61-0.74)</u>                   |
| <u>35-39</u>                     | <u>0.66 (0.58-0.75)</u>                   | <u>0.67 (0.60-0.76)</u>                   |
| <u>40+</u>                       | <u>0.64 (0.48-0.86)</u>                   | <u>0.67 (0.48-0.92)</u>                   |
| <b><u>Augmentation</u></b>       |                                           |                                           |
| <u>16-19</u>                     | <u>0.35 (0.27-0.45)</u>                   | <u>0.37 (0.29-0.47)</u>                   |
| <u>20-24</u>                     | <u>0.47 (0.38-0.57)</u>                   | <u>0.47 (0.39-0.57)</u>                   |
| <u>25-29</u>                     | <u>0.53 (0.46-0.61)</u>                   | <u>0.54 (0.47-0.61)</u>                   |
| <u>30-34</u>                     | <u>0.60 (0.52-0.70)</u>                   | <u>0.63 (0.53-0.74)</u>                   |
| <u>35-39</u>                     | <u>0.61 (0.48-0.77)</u>                   | <u>0.61 (0.49-0.75)</u>                   |
| <u>40+</u>                       | <u>0.56 (0.33-0.97)</u>                   | <u>0.56 (0.33-0.95)</u>                   |

<sup>1</sup> Probability weights are incorporated to account for differences in the probability of a woman being selected for inclusion in the study arising from differences in each unit/trust's period of participation and the stratum specific probabilities of selection of OUs.

<sup>2</sup> Adjusted for ethnic group, understanding of English, marital/partner status, BMI in pregnancy, index of multiple deprivation score quintile, and gestation at delivery.



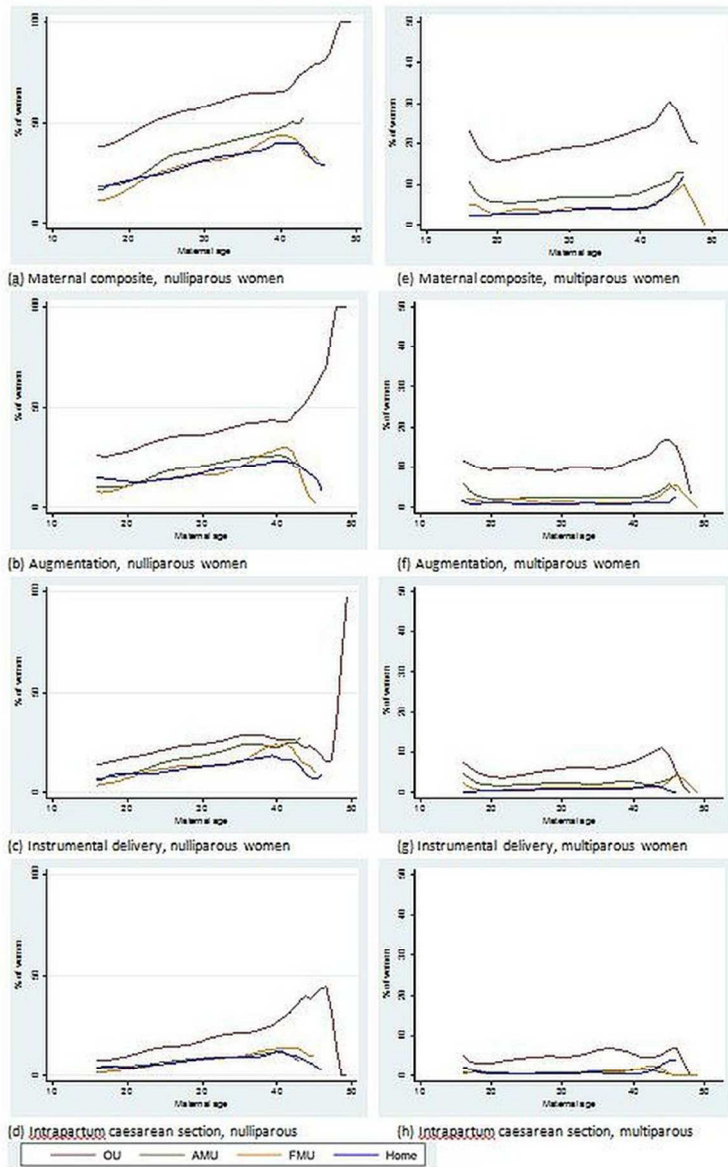

61x90mm (300 x 300 DPI)

1  
2  
3  
4  
5  
6  
7  
8  
9  
10  
11  
12  
13  
14  
15  
16  
17  
18  
19  
20  
21  
22  
23  
24  
25  
26  
27  
28  
29  
30  
31  
32  
33  
34  
35  
36  
37  
38  
39  
40  
41  
42  
43  
44  
45  
46  
47  
48  
49  
50  
51  
52  
53  
54  
55  
56  
57  
58  
59  
60

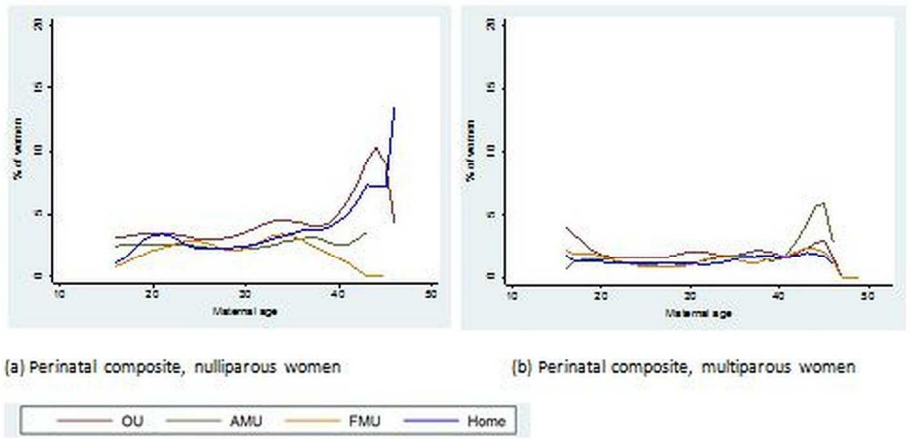

Figure 2 Association between maternal age and perinatal composite outcome in low risk women aged 16 and over

157x90mm (300 x 300 DPI)

review only

Please NOTE that the pages have been updated to be related to **the revised version with “track changes”**.

STROBE Statement—Checklist of items that should be included in reports of *cohort studies*

|                           | Item No | Recommendation                                                                                                                                                                       |                                                                                            |
|---------------------------|---------|--------------------------------------------------------------------------------------------------------------------------------------------------------------------------------------|--------------------------------------------------------------------------------------------|
| <b>Title and abstract</b> | 1       | (a) Indicate the study’s design with a commonly used term in the title or the abstract                                                                                               | Yes – title and abstract                                                                   |
|                           |         | (b) Provide in the abstract an informative and balanced summary of what was done and what was found                                                                                  | Yes, p2-3                                                                                  |
| <b>Introduction</b>       |         |                                                                                                                                                                                      |                                                                                            |
| Background/rationale      | 2       | Explain the scientific background and rationale for the investigation being reported                                                                                                 | Yes, p5                                                                                    |
| Objectives                | 3       | State specific objectives, including any prespecified hypotheses                                                                                                                     | Yes, p5                                                                                    |
| <b>Methods</b>            |         |                                                                                                                                                                                      |                                                                                            |
| Study design              | 4       | Present key elements of study design early in the paper                                                                                                                              | Yes, p6                                                                                    |
| Setting                   | 5       | Describe the setting, locations, and relevant dates, including periods of recruitment, exposure, follow-up, and data collection                                                      | Yes, p6-7. References also given to other publications providing more details              |
| Participants              | 6       | (a) Give the eligibility criteria, and the sources and methods of selection of participants. Describe methods of follow-up                                                           | more details                                                                               |
|                           |         | (b) For matched studies, give matching criteria and number of exposed and unexposed                                                                                                  | N/A                                                                                        |
| Variables                 | 7       | Clearly define all outcomes, exposures, predictors, potential confounders, and effect modifiers. Give diagnostic criteria, if applicable                                             | Yes, p7-8 and Table S1                                                                     |
| Data sources/measurement  | 8*      | For each variable of interest, give sources of data and details of methods of assessment (measurement). Describe comparability of assessment methods if there is more than one group | Yes, p8, more details in cited reports.                                                    |
| Bias                      | 9       | Describe any efforts to address potential sources of bias                                                                                                                            | Cohort study methods to minimise bias addressed elsewhere – ref 26.                        |
| Study size                | 10      | Explain how the study size was arrived at                                                                                                                                            | N/A. Secondary analysis of existing data. Original power calculations described in ref 26. |
| Quantitative variables    | 11      | Explain how quantitative variables were handled in the analyses. If applicable, describe which groupings were chosen and why                                                         | Yes, p7-9.                                                                                 |
| Statistical methods       | 12      | (a) Describe all statistical methods, including those used to control for confounding                                                                                                | Yes, p7-9                                                                                  |
|                           |         | (b) Describe any methods used to examine subgroups and interactions                                                                                                                  | Yes, interactions p8                                                                       |
|                           |         | (c) Explain how missing data were addressed                                                                                                                                          | N/A. Low level of missing data                                                             |
|                           |         | (d) If applicable, explain how loss to follow-up was addressed                                                                                                                       | N/A                                                                                        |
|                           |         | (e) Describe any sensitivity analyses                                                                                                                                                | Yes, p8                                                                                    |

| <b>Results</b>           |     |                                                                                                                                                                                                              |                                                                                                                |
|--------------------------|-----|--------------------------------------------------------------------------------------------------------------------------------------------------------------------------------------------------------------|----------------------------------------------------------------------------------------------------------------|
| Participants             | 13* | (a) Report numbers of individuals at each stage of study—eg numbers potentially eligible, examined for eligibility, confirmed eligible, included in the study, completing follow-up, and analysed            | P10 for current study; refs given for 'recruitment' into main study                                            |
|                          |     | (b) Give reasons for non-participation at each stage                                                                                                                                                         | Ditto                                                                                                          |
|                          |     | (c) Consider use of a flow diagram                                                                                                                                                                           | N/A                                                                                                            |
| Descriptive data         | 14* | (a) Give characteristics of study participants (eg demographic, clinical, social) and information on exposures and potential confounders                                                                     | Yes, Tables 1, S2 and S3                                                                                       |
|                          |     | (b) Indicate number of participants with missing data for each variable of interest                                                                                                                          | Yes, Tables 1, S2 and S3                                                                                       |
|                          |     | (c) Summarise follow-up time (eg, average and total amount)                                                                                                                                                  | N/A                                                                                                            |
| Outcome data             | 15* | Report numbers of outcome events or summary measures over time                                                                                                                                               | Yes, fully reported in tables                                                                                  |
| Main results             | 16  | (a) Give unadjusted estimates and, if applicable, confounder-adjusted estimates and their precision (eg, 95% confidence interval). Make clear which confounders were adjusted for and why they were included | Yes, unadjusted & adjusted estimates and 95% CIs reported in tables; adjustment variables described (Table S1) |
|                          |     | (b) Report category boundaries when continuous variables were categorized                                                                                                                                    | Yes. Maternal age – Table 1; confounders Table S1                                                              |
|                          |     | (c) If relevant, consider translating estimates of relative risk into absolute risk for a meaningful time period                                                                                             | Absolute event rates reported in tables                                                                        |
| Other analyses           | 17  | Report other analyses done—eg analyses of subgroups and interactions, and sensitivity analyses                                                                                                               | All analyses reported in manuscript or supplementary tables                                                    |
| <b>Discussion</b>        |     |                                                                                                                                                                                                              |                                                                                                                |
| Key results              | 18  | Summarise key results with reference to study objectives                                                                                                                                                     | Yes, p14                                                                                                       |
| Limitations              | 19  | Discuss limitations of the study, taking into account sources of potential bias or imprecision. Discuss both direction and magnitude of any potential bias                                                   | Yes, p14-15                                                                                                    |
| Interpretation           | 20  | Give a cautious overall interpretation of results considering objectives, limitations, multiplicity of analyses, results from similar studies, and other relevant evidence                                   | Other evidence comprehensively summarised p15-17; cautious interpretation p17                                  |
| Generalisability         | 21  | Discuss the generalisability (external validity) of the study results                                                                                                                                        | Yes, p14                                                                                                       |
| <b>Other information</b> |     |                                                                                                                                                                                                              |                                                                                                                |
| Funding                  | 22  | Give the source of funding and the role of the funders for the present study and, if applicable, for the original study on which the present article is based                                                | Yes, p18                                                                                                       |

\*Give information separately for exposed and unexposed groups.



**The effect of maternal age and planned place of birth on intrapartum outcomes in healthy women with straightforward pregnancies: secondary analysis of the Birthplace national prospective cohort study**

|                                 |                                                                                                                                                                                                                                                                                                                                                                                                                                                                                                                                                                                                                                                                                                                                                                                                                                                                                                                                                               |
|---------------------------------|---------------------------------------------------------------------------------------------------------------------------------------------------------------------------------------------------------------------------------------------------------------------------------------------------------------------------------------------------------------------------------------------------------------------------------------------------------------------------------------------------------------------------------------------------------------------------------------------------------------------------------------------------------------------------------------------------------------------------------------------------------------------------------------------------------------------------------------------------------------------------------------------------------------------------------------------------------------|
| Journal:                        | <i>BMJ Open</i>                                                                                                                                                                                                                                                                                                                                                                                                                                                                                                                                                                                                                                                                                                                                                                                                                                                                                                                                               |
| Manuscript ID:                  | bmjopen-2013-004026.R2                                                                                                                                                                                                                                                                                                                                                                                                                                                                                                                                                                                                                                                                                                                                                                                                                                                                                                                                        |
| Article Type:                   | Research                                                                                                                                                                                                                                                                                                                                                                                                                                                                                                                                                                                                                                                                                                                                                                                                                                                                                                                                                      |
| Date Submitted by the Author:   | 12-Dec-2013                                                                                                                                                                                                                                                                                                                                                                                                                                                                                                                                                                                                                                                                                                                                                                                                                                                                                                                                                   |
| Complete List of Authors:       | Li, Yangmei; University of Oxford, Policy Research Unit in Maternal Health and Care, National Perinatal Epidemiology Unit, Nuffield Department of Population Health<br>Townend, John; University of Oxford, Policy Research Unit in Maternal Health and Care, National Perinatal Epidemiology Unit, Nuffield Department of Population Health<br>Rowe, Rachel; University of Oxford, Policy Research Unit in Maternal Health and Care, National Perinatal Epidemiology Unit, Nuffield Department of Population Health<br>Knight, Marian; University of Oxford, Policy Research Unit in Maternal Health and Care, National Perinatal Epidemiology Unit, Nuffield Department of Population Health<br>Brocklehurst, Peter; University College London, Institute for Women's Health<br>Hollowell, Jennifer; University of Oxford, Policy Research Unit in Maternal Health and Care, National Perinatal Epidemiology Unit, Nuffield Department of Population Health |
| <b>Primary Subject Heading</b>: | Obstetrics and gynaecology                                                                                                                                                                                                                                                                                                                                                                                                                                                                                                                                                                                                                                                                                                                                                                                                                                                                                                                                    |
| Secondary Subject Heading:      | Epidemiology, Medical management, Evidence based practice, Health services research                                                                                                                                                                                                                                                                                                                                                                                                                                                                                                                                                                                                                                                                                                                                                                                                                                                                           |
| Keywords:                       | OBSTETRICS, Midwifery led care, Maternal medicine < OBSTETRICS, Intrapartum care                                                                                                                                                                                                                                                                                                                                                                                                                                                                                                                                                                                                                                                                                                                                                                                                                                                                              |
|                                 |                                                                                                                                                                                                                                                                                                                                                                                                                                                                                                                                                                                                                                                                                                                                                                                                                                                                                                                                                               |

SCHOLARONE™  
Manuscripts

1  
2  
3 **The effect of maternal age and planned place of birth on intrapartum**  
4 **outcomes in healthy women with straightforward pregnancies:**  
5 **secondary analysis of the Birthplace national prospective cohort**  
6 **study**  
7  
8  
9

10  
11  
12  
13  
14 **Authors**

15  
16  
17 Yangmei Li,<sup>1</sup> John Townend,<sup>1</sup> Rachel Rowe,<sup>1</sup> Marian Knight,<sup>1</sup> Peter Brocklehurst,<sup>2</sup> Jennifer Hollowell<sup>1</sup>

18  
19  
20 <sup>1</sup> Policy Research Unit in Maternal Health and Care, National Perinatal Epidemiology Unit, Nuffield  
21 Department of Population Health, University of Oxford, Oxford, UK  
22

23  
24 <sup>2</sup> Institute for Women's Health, University College London, London, UK  
25  
26  
27  
28

29 **Corresponding author**

30  
31  
32 Jennifer Hollowell PhD, Policy Research Unit in Maternal Health and Care, National Perinatal  
33 Epidemiology Unit, Nuffield Department of Population Health, University of Oxford, Old Road  
34 Campus, Headington, Oxford, OX3 7LF, United Kingdom  
35

36  
37  
38 Tel: +44 (0)1865 289452 (direct)/289700 (messages)

39  
40 Fax: +44 (0)1865 289701

41  
42  
43 Email: [jennifer.hollowell@npeu.ox.ac.uk](mailto:jennifer.hollowell@npeu.ox.ac.uk)  
44

45 **Keywords**

46  
47  
48 Maternal age, parity, birthing centre, home birth, augmentation, instrumental delivery, caesarean  
49 section, adverse maternal outcomes, adverse perinatal outcomes  
50  
51

52 **Word count**

53  
54  
55 Main text 4,630 words  
56  
57  
58  
59  
60

## Abstract

### Objectives

To describe the relationship between maternal age and intrapartum outcomes in 'low risk' women; and to evaluate whether the relationship between maternal age and intrapartum interventions and adverse outcomes differs by planned place of birth

### Design

Prospective cohort study

### Setting

Obstetric units, midwifery units and planned home births in England

### Participants

63,371 women aged over 16 without known medical or obstetric risk factors, with singleton pregnancies, planning vaginal birth

### Methods

Log Poisson regression was used to evaluate the association between maternal age, modelled as a continuous and categorical variable, and risk of intrapartum interventions and adverse maternal and perinatal outcomes.

### Main Outcome Measures

Intrapartum caesarean section, instrumental delivery, syntocinon augmentation and a composite measure of maternal interventions/adverse outcomes requiring obstetric care encompassing augmentation, instrumental delivery, intrapartum caesarean section, general anaesthesia, blood transfusion, 3<sup>rd</sup>/4<sup>th</sup> degree tear, maternal admission; adverse perinatal outcome (encompassing neonatal unit admission or perinatal death).

### Results

Interventions and adverse maternal outcomes requiring obstetric care generally increased with age, particularly in nulliparous women. For nulliparous women aged 16-40, the risk of experiencing an intervention or adverse outcome requiring obstetric care increased more steeply with age in

1 planned non-obstetric unit births than in planned obstetric unit births (adjusted RR 1.21 per 5-year  
2 increase in age, 95% CI 1.18-1.25 vs. adjusted RR 1.12, 95% CI 1.10-1.15) but absolute risks were  
3 lower in planned non-OU births at all ages. The risk of neonatal unit admission or perinatal death  
4 was significantly raised in nulliparous women aged 40+ relative to women aged 25-29 (adjusted RR  
5 2.29, 95% CI 1.28-4.09).  
6  
7  
8

### 9 **Conclusions**

10  
11  
12 At all ages 'low risk' women who plan birth in a non-obstetric unit setting tend to experience lower  
13 intervention rates than comparable women who plan birth in an OU. Younger nulliparous women  
14 appear to benefit more from this reduction than older nulliparous women.  
15  
16  
17  
18  
19  
20  
21  
22  
23  
24  
25  
26  
27  
28  
29  
30  
31  
32  
33  
34  
35  
36  
37  
38  
39  
40  
41  
42  
43  
44  
45  
46  
47  
48  
49  
50  
51  
52  
53  
54  
55  
56  
57  
58  
59  
60



## Article summary

### Article focus

- Does increasing age in women without known medical or obstetric risk factors increase the risk of intrapartum interventions and adverse outcomes that might affect their choice of planned place of birth?

### Key messages

- At all ages 'low risk' women who plan birth in a non-obstetric unit setting have lower intervention rates than comparable women who plan their birth in an obstetric unit
- The chances of experiencing an intervention or outcome that requires obstetric care increase with age, even in women who do not have known risk factors.
- Younger nulliparous women appear to benefit more than older nulliparous women from the reduction in interventions associated with planned birth in a non-obstetric unit setting

### Strengths and weaknesses

#### Strengths

- The study was based on a large, nationally representative cohort of 'low risk' women, with high quality data collected prospectively.

#### Weaknesses

- The number of women over 40 was relatively small so the study had limited power to explore effects in women over 40, particularly in non-obstetric unit settings.
- Planned births in non-obstetric unit settings were combined; graphical plots indicated that this was reasonable but important differences between settings cannot be ruled out.

## Background

The proportion of births in women aged 35 and over has been steadily rising in recent years in the UK and elsewhere.[1, 2] Currently approximately 16% of births in England and Wales are to women aged 35-39 and 4% of births are to women aged 40 and over.[1]

Advanced maternal age is associated with an increased risk of pregnancy complications including gestational diabetes,[3] pregnancy induced hypertension and preeclampsia,[4, 5] twin or higher order pregnancies,[3] breech presentation,[6] placenta praevia,[3, 7-9] preterm birth,[5, 10] post-term birth,[11], severe maternal morbidity,[12] and adverse perinatal outcomes including antepartum stillbirth,[13] intrapartum-related perinatal death,[14] early neonatal death[15] and neonatal unit admission.[5] Older women also have an increased risk of interventions such as induction and caesarean section.[16-20] However, many age-related pregnancy complications are known risk factors for intrapartum complications or adverse perinatal outcomes and women with these risk factors would normally be advised to give birth in an obstetric unit (OU). Relatively little is known about the incidence of intrapartum interventions and adverse maternal and perinatal outcomes in older women who do not have known risk factors.[21]

The current clinical guideline in England[22] recommends that healthy women with straightforward pregnancies should be offered a choice of planned birth at home, in a midwife-led unit or in an obstetric unit, but also suggest individual assessment when planning place of birth for women over 40 at booking.[22] The evidence for 'low risk' women in general shows that planned birth in a non-OU setting is associated with a lower incidence of intrapartum interventions[22-28] and research has demonstrated that in 'low risk' women, after adjustment for maternal characteristics, planned birth in a midwifery unit and planned birth at home (multiparous women only) is not associated with an increased risk to the baby compared with planned birth in an OU.[25] However, rates of intrapartum transfer increase with age in nulliparous women[29] and, more generally, the risks that might affect the choice of planned place of birth (PPOB) by healthy older women are not well documented.

The aim of this study was to evaluate the association between maternal age and intrapartum interventions and adverse maternal and perinatal outcomes that may influence the choice of planned place of birth, in 'low risk' women with singleton, term pregnancies planning a vaginal birth.

The main objectives were to describe the relationship between maternal age and intrapartum interventions and adverse outcomes that indicate a need for obstetric or neonatal care in 'low risk' women; and to evaluate whether the relationship between maternal age and intrapartum

1 interventions and adverse outcomes differs by planned place of birth.  
2  
3  
4  
5  
6  
7  
8  
9  
10  
11  
12  
13  
14  
15  
16  
17  
18  
19  
20  
21  
22  
23  
24  
25  
26  
27  
28  
29  
30  
31  
32  
33  
34  
35  
36  
37  
38  
39  
40  
41  
42  
43  
44  
45  
46  
47  
48  
49  
50  
51  
52  
53  
54  
55  
56  
57  
58  
59  
60

For peer review only

## Methods

### Settings and participants

The study used data from the Birthplace in England national prospective cohort study which was designed to compare perinatal and maternal outcomes and interventions by planned place of birth at the start of care in labour.

The cohort study methods are described in full elsewhere.[25, 26] Briefly, the Birthplace cohort included a total of 79,774 births between April 2008 and April 2010, including 32,257 planned OU births from a stratified random sample of 36 OUs, 11,666 planned births in 53 freestanding midwifery units (FMUs), 17,582 planned births in 43 alongside midwifery units (AMUs) and 18,269 planned home births from 142 NHS trusts across England. Births were eligible for inclusion if the woman was planning a vaginal birth and received some labour care from an NHS midwife in her planned birth setting. Women who had an elective caesarean section or caesarean section before the onset of labour, presented in preterm labour (<37 weeks' gestation), had a multiple pregnancy, an unplanned home birth, or who were "unbooked" (received no antenatal care) were excluded. Stillbirths occurring before the start of care in labour were excluded. Women in the cohort were classified as 'low risk' if before the start of labour they were not known to have any of the medical or obstetric risk factors listed in national guidelines on intrapartum care[22] as "indicating increased risk suggesting planned birth in an obstetric unit". The study had a high response rate and low levels of missing data.[25, 26]

The study population for the analyses reported here was 'low risk' women in the Birthplace cohort aged 16 years or over at the time of birth, with a term (gestational age 37<sup>+0</sup> weeks to 42<sup>+0</sup> weeks inclusive) pregnancy and parity less than 6. In the NICE intrapartum care guideline individual assessment is recommended when planning place of birth for women with parity of 6 or more and many midwifery units restrict admission to women of parity 5 or less.[30] We additionally excluded women for whom age, parity or gestational age was not known.

Research ethics committee approval for the Birthplace study was obtained from the Berkshire Research Ethics Committee and did not require consent to be sought from participants as no personally identifiable data were collected.

### Data

1 As described elsewhere,[25] maternal characteristics, and medical or obstetric risk factors known  
2 prior to the onset of labour were extracted from the woman's medical records by the midwife  
3 attending the birth. Complicating conditions identified by the midwife at the start of care in labour  
4 (for example prolonged rupture of membranes), intrapartum interventions and adverse maternal  
5 and perinatal outcomes were recorded by the attending midwife using a data collection form started  
6 during labour and completed on or after the fifth postnatal day.  
7  
8  
9

10  
11 Planned place of birth (OU, AMU, FMU or home) was based on the intended place of birth at the  
12 start of care in labour. Women were included in the group in which they planned to give birth at the  
13 start of care in labour regardless of whether they were transferred during labour care or  
14 immediately after the birth.  
15  
16  
17

### 18 **Outcomes**

19  
20 We focused on outcome measures that reflected interventions and adverse outcomes that indicated  
21 a need for obstetric and/or neonatal care, that is, outcomes that would require the woman and/or  
22 baby to be transferred to an obstetric or neonatal unit if labour care or birth took place elsewhere.  
23 For women, we considered the following outcomes both separately and as a combined maternal  
24 composite outcome ('interventions/adverse outcomes requiring obstetric care'): augmentation with  
25 syntocinon, instrumental delivery (ventouse or forceps), intrapartum caesarean section, general  
26 anaesthesia, maternal blood transfusion, 3<sup>rd</sup>/4<sup>th</sup> degree perineal tear, maternal admission for higher  
27 level care. The use of epidural/spinal analgesia was also considered as a secondary outcome. The  
28 main outcomes considered for women were the maternal composite outcome ('interventions and  
29 adverse outcomes requiring obstetric care'), augmentation, instrumental delivery, and intrapartum  
30 caesarean section.  
31  
32  
33  
34  
35  
36  
37  
38  
39

40 For babies, we considered a single composite outcome measure largely reflecting admission to a  
41 neonatal unit. This 'perinatal composite outcome' encompassed one or more of the following  
42 events: admission to a neonatal unit within 48 hours of birth, stillbirth after the onset of labour or  
43 early neonatal death.  
44  
45  
46

### 47 **Statistical analysis**

48  
49 Analyses were conducted separately by parity. We modelled age at the time of delivery both as a  
50 categorical and continuous variable, using log Poisson regression to estimate relative risks adjusted  
51 for the following potential confounders: ethnic group, understanding of English, marital or partner  
52 status, body mass index (BMI), index of multiple deprivation (IMD) score, gestational age at birth  
53 and, where appropriate, planned place of birth (see supplementary Table S1 for categorisation). We  
54  
55  
56  
57  
58  
59  
60

1 also carried out sensitivity analyses in which we additionally adjusted for the presence of  
2 complicating conditions identified at the start of care in labour (none, one or more) and for the use  
3 of epidural/spinal analgesia.  
4

5  
6 We fitted a series of models following a pre-specified, iterative strategy. In order to test our  
7 modelling assumptions regarding age and to determine whether it was appropriate to combine data  
8 for planned births in non-OU settings, we plotted outcomes by age and planned place of birth using  
9 polynomial smoothing.[31] Visual inspection of these plots (see Figure 1 and 2 for the main  
10 outcomes) indicated that it was reasonable to model age as a continuous variable within the age  
11 range 16-40 (inclusive) and further indicated that event rates were generally similar in the three  
12 non-OU settings, suggesting that it was reasonable to combine the non-OU settings for the purposes  
13 of exploring interactions between maternal age and planned place of birth. We did not model age as  
14 a continuous variable above the age of 40 because data were sparse, particularly for planned non-  
15 OU births to nulliparous women, and we could not be confident that the broadly linear trends seen  
16 at younger ages could be extrapolated above this age.  
17  
18

19  
20 We initially modelled the effect of age on study outcomes separately by parity and for all planned  
21 places of birth combined. Models in which age was modelled as a continuous variable were  
22 restricted to the age range 16-40 inclusive. For each of the study outcomes, we tested for an  
23 interaction between age (as a continuous variable) and planned place of birth (OU vs. non-OU) using  
24 a Wald test, and where the interaction was significant at the 5% level, we modelled the effect of age  
25 on the outcome separately by planned place of birth. For outcomes where the interaction between  
26 age and planned place of birth was significant, we calculated crude and adjusted relative risks  
27 associated with planned non-OU birth separately for each age band.  
28  
29

30  
31 In order to test whether the presence of complicating conditions at the start of care in labour (for  
32 example prolonged rupture of membranes) had an effect on the observed relationships, we fitted a  
33 further set of models in which we adjusted for both maternal characteristics and the presence of  
34 complicating conditions. Because previous analyses have shown that women planning birth in an OU  
35 have a higher prevalence of complicating conditions than in other settings[25] and this affects the  
36 magnitude of the difference in event rates between settings, we carried out further analyses of the  
37 main outcomes restricted to 'low risk' women without complicating conditions at the start of care in  
38 labour.  
39  
40

41  
42 Robust variance estimation was used to allow for the clustered nature of the data and, as described  
43 elsewhere,[25, 26] probability weights were incorporated to account for differences in the  
44 probability of a woman being selected for inclusion in the study arising from differences in each  
45  
46  
47  
48  
49  
50  
51

1 unit/trust's period of participation and the stratum specific probabilities of selection of OUs. The  
2 weighting is such that, when applied to the pooled data for all four settings, the weighted event  
3 rates represent the estimated average event rates for England as a whole.  
4

5  
6 For each outcome, we calculated the number of events, the number of births, the weighted  
7 incidence and 95% confidence intervals. We assessed statistical significance at the 5% level.  
8  
9

10  
11  
12  
13  
14  
15  
16  
17  
18  
19  
20  
21  
22  
23  
24  
25  
26  
27  
28  
29  
30  
31  
32  
33  
34  
35  
36  
37  
38  
39  
40  
41  
42  
43  
44  
45  
46  
47  
48  
49  
50  
51  
52  
53  
54  
55  
56  
57  
58  
59  
60

For peer review only

## Results

### Description of the study sample

From the 79,774 women in the Birthplace cohort we excluded 15,553 women who had pre-existing risk factors including 'NICE' medical and obstetric risk factors,[22] grand multiparity (parity 6 or over) and post-term pregnancy, 62 women who were aged under 16, 682 women who had missing data on risk factors, parity or gestational age, and 106 whose age was missing. The study population consisted of 63,371 eligible 'low risk' women. The proportion (weighted) of women who were ineligible because of pre-existing risk factors, increased from 31.9% in women aged 16-19 to 46.7% in women aged 40 and over.

Table 1 describes the characteristics of the sample by age. The percentages shown in the table are weighted so that they provide an estimate of the distribution of maternal characteristics that would apply to eligible 'low risk' births in England. Older women tended to be white, have a fluent understanding of English, and were more likely than younger women to live in a socioeconomically advantaged area. They were less likely than younger women to be nulliparous and more likely to have had multiple previous pregnancies. Planned home births were more common at older ages (Table 1 and supplementary Tables S2 and S3), particularly in multiparous women (supplementary Table S3). Older women were more likely to have complicating conditions, such as prolonged rupture of membranes, noted by the midwife at the start of care in labour (Table 1). Complicating conditions at start of care in labour were more common in nulliparous women (supplementary Tables S2 and S3).

[TABLE 1 HERE]

### Maternal interventions and adverse outcomes

Descriptive plots of outcomes by age indicated that the incidence of most outcomes tended to increase steadily with age in the age range 16 to 40, and that incidence rates were generally lower in planned non-OU births (Figure 1 and supplementary Figure S1). Rates for planned OU and non-OU births tended to diverge above this age range, but rates were based on small numbers of older women (supplementary Table S4) particularly for planned AMU and FMU births and therefore these rates have wide confidence intervals.

For nulliparous women in the age range 16-40 (all PPOBs combined), the adjusted risk of having an intervention/ adverse outcome requiring obstetric care (maternal composite) increased significantly



1 with age, as did the risk of augmentation with syntocinon, instrumental delivery, intrapartum  
2 caesarean section, 3<sup>rd</sup>/4<sup>th</sup> degree perineal tear, or maternal admission for higher level care (Table 2).  
3 For augmentation with syntocinon and the maternal composite outcome, the effect of age differed  
4 by PPOB (Table 2). The risk of augmentation increased more steeply with age in non-OU settings (RR  
5 1.23, 95% CI 1.18-1.28 for every 5-year increase in age in planned non-OU births vs. 1.12, 95% CI  
6 1.07-1.17 for planned OU births). Nevertheless, the proportion of women receiving augmentation  
7 was lower in planned non-OU births at all ages (Table 3). For example, 42.2% (95% CI 36.4%-48.1%)  
8 of nulliparous women aged 35-39 who planned birth in an OU received augmentation with  
9 syntocinon compared with 22.6% (95% CI 19.8%-25.7%) of nulliparous women of the same age who  
10 planned birth in a non-OU setting. A similar pattern was observed for the maternal composite  
11 outcome: the risk of an intervention/adverse outcome requiring obstetric care (maternal composite)  
12 increased slightly more steeply with age in the non-OU settings (RR 1.21, 95% CI 1.18-1.25 for every  
13 5-year increase in age in planned non-OU births vs. 1.12, 95% CI 1.10-1.15 for planned OU births) but  
14 the absolute risk was lower in the planned non-OU birth at all ages (Table 3). For example, 65.5%  
15 (95% CI 61.8%-69.1%) of nulliparous women aged 35-39 who planned birth in an OU experienced an  
16 intervention/adverse outcome requiring obstetric care compared with 39.9% (95% CI 36.0%-43.9%)  
17 of nulliparous women of the same age who planned birth in a non-OU setting. In nulliparous women,  
18 the risk of instrumental delivery and intrapartum caesarean section increased significantly with age  
19 (RR 1.18, 95% CI 1.12-1.25 and RR 1.27, 95% CI 1.23-1.32) across all settings. Again, absolute risks  
20 were substantially lower in planned non-OU births (Table 3).  
21  
22  
23  
24  
25  
26  
27  
28  
29  
30  
31  
32

33  
34 [TABLE 2 AND TABLE 3 HERE]

35  
36  
37 Similar patterns were observed when we adjusted for complicating conditions at the start of care in  
38 labour in order to take account of difference between settings in complicating conditions at the start  
39 of care in labour (23.9% in nulliparous planned OU births vs. 8.6% in nulliparous planned-non-OU  
40 births) (supplementary Table S5).  
41  
42

43  
44 However, although the risk of intervention increased with age, at all ages, nulliparous women who  
45 planned birth in a non-OU setting had a significantly reduced risk of receiving augmentation or of  
46 experiencing an intervention/adverse outcome requiring obstetric care. Table 4 shows the adjusted  
47 risks by age for the two outcomes (maternal composite and augmentation) where the effect of  
48 planned place of birth differed by age.  
49  
50

51  
52  
53 [TABLE 4 HERE]

54  
55  
56 For multiparous women aged 16-40 (all PPOBs combined), the combined risk of having an  
57 intervention or adverse outcome requiring obstetric care (maternal composite) or of instrumental  
58  
59

1 delivery, intrapartum caesarean section, and maternal admission for higher level care increased with  
2 age (Table 2). Augmentation with syntocinon, general anaesthesia, blood transfusion, and 3<sup>rd</sup>/4<sup>th</sup>  
3 degree perineal tear were not associated with maternal age in multiparous women (Table 2). For all  
4 of the outcomes considered, the effect of age did not differ by PPOB in multiparous women (Table  
5 2). Again, for the maternal composite outcome, augmentation with syntocinon, instrumental  
6 delivery, intrapartum caesarean section, the absolute event rates were lower in planned non-OU  
7 births in most age categories (Table 5). For example, 9.8% (95% CI 8.2%-11.6%) of multiparous  
8 women aged 35-39 who planned birth in an OU received augmentation with syntocinon compared  
9 with 1.8% (95% CI 1.3%-2.5%) of women of the same age who planned birth in a non-OU setting.

10  
11  
12  
13  
14  
15  
16 Up to age 40, other less common outcomes did not increase significantly with maternal age in  
17 nulliparous or multiparous women with the exception of maternal admission to higher level care  
18 (Table 2 and supplementary Tables S6 and S7).

19  
20  
21  
22 [TABLE 5 HERE]

23  
24  
25 Absolute event rates for the main outcomes (maternal composite, augmentation with syntocinon,  
26 instrumental delivery, intrapartum caesarean section and perinatal composite) were reduced when  
27 the analysis was restricted to women without complicating conditions identified at start of labour  
28 care (supplementary Tables S8 and S9). However, at all ages, nulliparous women without  
29 complicating conditions who planned birth in a non-OU setting had a significantly reduced risk of  
30 experiencing an intervention/adverse outcome requiring obstetric care (maternal composite  
31 outcome) (Table S8 and S10). For example, 38.0% (95% CI 34.3%-41.9%) of nulliparous women aged  
32 35-39 without complicating complications who planned birth in a non-OU setting experienced an  
33 intervention/adverse outcome requiring obstetric care, compared with 57.7% (95% CI 53.4%- 62.0%)  
34 of women of the same age without complicating conditions who planned birth in an OU.

35  
36  
37  
38  
39  
40  
41  
42 The use of epidural/spinal analgesia increased significantly with maternal age and lower rates of use  
43 were observed in planned non-OU births (supplementary Figure S2). Adjustment for use of epidural  
44 in the multivariable models attenuated but did not change the results materially (data not shown).

#### 45 46 47 **Perinatal outcome**

48  
49  
50 The perinatal composite outcome (admission to a neonatal unit within 48 hours of birth, stillbirth  
51 after the onset of labour or early neonatal death) showed a modest but not statistically significant  
52 increase with age in nulliparous women in the age range 16-40 (Table 2). The risk increased  
53 significantly in nulliparous women aged 40+ compared with women aged 25-29 (RR 2.29, 95%CI  
54 1.28-4.09, adjusted for maternal characteristics and planned place of birth, all settings combined).

1 Maternal age was not significantly associated with the risk of the perinatal composite outcome in  
2 multiparous women in the age range 16-40 (Table 2) and the risk was not significantly increased in  
3 births to multiparous women aged 40+ compared with women aged 25-29 (RR 1.21, 95% CI 0.60-  
4 2.43, adjustment as before). Absolute event rates are shown in Table 6.  
5  
6  
7

8 [TABLE 6 HERE]  
9  
10  
11  
12  
13  
14  
15  
16  
17  
18  
19  
20  
21  
22  
23  
24  
25  
26  
27  
28  
29  
30  
31  
32  
33  
34  
35  
36  
37  
38  
39  
40  
41  
42  
43  
44  
45  
46  
47  
48  
49  
50  
51  
52  
53  
54  
55  
56  
57  
58  
59  
60

For peer review only

## Discussion

### Principal findings

In women without known medical or obstetric risk factors prior to the onset of labour, interventions and adverse maternal outcomes requiring obstetric care generally increased with age, but there was no age at which there was a step-change in risk. For both nulliparous and multiparous women, maternal intervention rates were lower in births planned in non-OU settings compared with planned OU births at all ages. For nulliparous women the overall risk of experiencing an intervention or adverse outcome requiring obstetric care, and in particular of augmentation with syntocinon, increased more steeply with age in planned non-OU births than in planned OU births. As a consequence, although nulliparous women of all ages who planned birth in a non-OU setting had a significantly reduced risk of experiencing an intervention or adverse outcome requiring obstetric care, the benefit of planned non-OU birth was greatest at younger ages.

In low risk women up to the age of 40, the risk of neonatal unit admission or intrapartum stillbirth/early neonatal death did not show a statistically significant upward trend with age in either nulliparous or multiparous women. In planned OU births, the risk of neonatal unit admission or perinatal death was significantly higher in nulliparous women aged 40+ relative to women aged 25-29.

### Strengths and limitations

A strength of the study is that we were able to evaluate the effect of age on intrapartum outcomes by planned birth setting in a nationally representative sample of 'low risk' women. In order to strengthen the evidence supporting clinical guidelines on planned place of birth, the study specifically focused on outcomes that reflect need for obstetric or neonatal care in a sample of women who meet the current criteria for planned birth in a non-OU setting.[22] To our knowledge, this is the first study to investigate the effect of increasing maternal age in different birth settings with a focus on outcomes that would require transfer to an OU and hence may affect the choice of planned place of birth.

Despite the large overall sample size, the number of older women was relatively small, so we had limited ability to explore effects above age 40 or to separate results of individual non-OU birth settings. We combined data for the non-OU settings, having first explored the data to check that this was reasonable. This increased our statistical power to evaluate the association between maternal

1 age and the study outcomes (maternal and perinatal), but we still lacked the statistical power to  
2 evaluate uncommon outcomes. It is important to note that previous analyses[25] have shown that  
3 planned home births are associated with a significantly increased risk of adverse perinatal outcomes  
4 in nulliparous women.  
5  
6

7  
8 The risk of bias due to missing data and non-response was low: the study had a low level of missing  
9 data, a high response rate[25, 26] and, because consent was not required, there was no self-  
10 selection bias due to non-consent. We addressed potential differences in risk between groups in a  
11 number of ways. First, we controlled for important potential confounders such as body mass index.  
12 Second, we focused on a relatively homogeneous population of women without known medical or  
13 obstetric risk factors prior to the onset of labour. Third, because previous analyses[25] identified  
14 that the prevalence of complicating conditions at the start of care in labour was higher in the  
15 planned OU birth group, we conducted two additional analyses in which we controlled for  
16 complicating conditions and restricted the analysis to women without complicating conditions.  
17 Differences in the clinical characteristics of the OU and non-OU groups therefore seem unlikely to  
18 explain the age related trends observed or the significant reductions in risks observed in non-OU  
19 births. Nevertheless, women self-select their birth setting and it may be that some of the differences  
20 in outcomes that we observed between settings may have been due to unmeasured differences in  
21 the characteristics of women opting for OU and non-OU births, rather than to differences  
22 attributable to the birth setting.  
23  
24  
25  
26  
27  
28  
29  
30  
31  
32

### 33 **Comparison with the existing literature**

34  
35  
36 Older women have been shown to have an increased risk of intrapartum intervention,[6, 32] but  
37 many studies include women known to be at higher risk who would normally be advised to give birth  
38 in an obstetric unit. Evidence relating to 'low risk' women[17] or from studies that have controlled  
39 for pre-existing risk factors or complications[33] is more limited but is generally consistent with our  
40 finding that intervention rates increase with age in 'low risk' women.  
41  
42  
43  
44

45 There is extensive evidence that 'low risk' women who plan birth in a non-OU setting have a reduced  
46 risk of a range of intrapartum interventions, including augmentation, instrumental delivery and  
47 intrapartum caesarean section, and are more likely to have a spontaneous vaginal birth.[22-24, 27,  
48 28] Our study found that, at all ages, women who plan birth in a non-OU setting experience  
49 substantially lower intervention rates and are less likely to experience an outcome requiring  
50 obstetric care than women of the same age who plan birth in an obstetric unit.  
51  
52  
53  
54

55  
56 In nulliparous women we found that rates of augmentation of labour with syntocinon increased  
57 more steeply with maternal age in planned non-OU births compared with planned OU births,  
58  
59  
60

1 although absolute rates of augmentation were substantially lower in planned non-OU births at all  
2 ages. An age-related increase in augmentation is consistent with evidence of poorer uterine function  
3 at older ages,[34] longer labours[34] and an increased incidence of prolonged labour,[35, 36] but the  
4 reasons for a steeper increase in augmentation with age in non-OU settings is unclear. It has been  
5 suggested that labelling of older women as 'higher risk' and/or heightened concern about the safety  
6 of older nulliparous women, particularly those who have required fertility treatment, may result in  
7 increased rates of caesarean section for non-medical reasons,[20, 32, 33, 37] and it is possible that  
8 similar factors affect midwives' decision making regarding transfer for failure to progress, or for  
9 other reasons. Intrapartum transfers from midwifery units in the Birthplace study have been shown  
10 to increase significantly with age in nulliparous women[29] and, once transferred, women are  
11 'exposed' to the higher intervention rates found in obstetric units.  
12  
13  
14  
15  
16  
17  
18

19 It is also possible that age-related differences in women's expectations and expressed preferences  
20 may contribute to the pattern of intervention observed in our study. Older nulliparous women have  
21 been found to have a more positive attitude towards caesarean section,[38] for example, and also to  
22 have a higher perception of pregnancy risk, even in older women without known risk factors.[39]  
23 The significant positive association between maternal age and epidural use observed in our study  
24 (seen most strongly in nulliparous women planning a non-OU birth), would be consistent with a  
25 greater willingness of older women to consider interventions.  
26  
27  
28  
29  
30  
31

32 We found a significantly increased risk of maternal admission to higher level care at older ages in  
33 both nulliparous and multiparous women. The number of events was small and this could be a  
34 chance finding but an increase in serious obstetric complications at older ages observed in some  
35 studies[3, 6, 12] cannot be ruled out.  
36  
37  
38

39 Although studies including women with known risk factors have reported increased risks in women  
40 aged over 35,[3, 6, 35] our analysis shows that up to the age of 40, risks tend to increase in a broadly  
41 linear manner in healthy women with straightforward pregnancies, with no evidence of a step-  
42 change in risk below the age of 40. Other studies have similarly concluded that the association of  
43 adverse outcomes with maternal age is a continuum,[3] with the increase in adverse perinatal  
44 outcomes possibly gaining momentum above the age of 40.[40] Because of the small number of  
45 births to mothers aged over 40 in our sample we had limited power to evaluate risks at older ages  
46 and other evidence relating to older 'low risk' women is sparse.[21]  
47  
48  
49  
50  
51  
52

53 There is some evidence that the babies of older women are at increased risk of serious adverse  
54 outcomes, including intrapartum-related perinatal death,[14] early neonatal death[15] and neonatal  
55 unit admission,[5, 33] but these outcomes would be expected to be substantially reduced in 'low  
56  
57  
58  
59  
60

1 risk' women who, by definition, do not have medical or obstetric risk factors such as severe obesity,  
2 diabetes or previous caesarean section. Furthermore, the poorer outcomes associated with the  
3 increased risk of pre-term birth at older ages do not apply to women giving birth at term. In our 'low  
4 risk' cohort, we did not observe a significant increase with age in our composite measure of neonatal  
5 unit admission/perinatal death within the age range 16-40, but graphical plots for nulliparous  
6 women suggested a possible upturn in neonatal unit admission/perinatal death around the age of 40  
7 in nulliparous women. Further research evaluating perinatal outcomes in 'low risk' women aged over  
8 40 is needed.

### 14 **Conclusions and policy implications**

17 The incidence of intrapartum interventions and adverse outcomes requiring obstetric care increases  
18 with maternal age, but at all ages 'low risk' women who plan birth in a non-obstetric unit setting  
19 tend to experience lower intervention rates than comparable women who plan birth in an OU.  
20 Amongst nulliparous women, younger women appear to benefit more from the reduction in  
21 interventions associated with planned birth in a non-OU setting. Increased intervention rates at  
22 older ages may partly reflect women's expectations and preferences and possibly 'higher risk'  
23 labelling by clinicians.

28 All women, irrespective of age and parity, should be given information about the risks and benefits  
29 of different birth settings. Nulliparous women planning birth in non-OU setting should be informed  
30 that the risk of interventions that require transfer to an OU increases with age. Further research is  
31 required to evaluate adverse perinatal outcomes in 'low risk' women aged over 40.

## Acknowledgements

We thank Xiaosi Wang for conducting initial literature searches and statistical analysis.

## Competing interests

None.

## Contribution to authorship

JH conceived and developed the study outline with input from PB; YL developed the protocol and analysis plan with input from JH, JT and MK; YL conducted the analysis; JT provided statistical advice; YL and JH drafted the manuscript with input from RR, MK and PB. All authors were involved in interpretation of data, review and revision of the draft manuscript and approval of the final version.

## Ethics Approval

Research ethics committee approval for the Birthplace study was obtained from the Berkshire Research Ethics Committee (MREC ref 07/H0505/151).

## Funding

This paper reports on an independent study which is funded by the Policy Research Programme in the Department of Health. The views expressed are not necessarily those of the Department.

Birthplace combines the Evaluation of Maternity Units in England study funded in 2006 by the National Institute for Health Research Service Delivery and Organisation (NIHR SDO) programme, and the Birth at Home in England study funded in 2007 by the Department of Health Policy Research Programme (DH PRP). From January 2012, the NIHR SDO programme merged with the NIHR Health Services Research programme to establish the new NIHR health Services and Delivery Research (NIHR HS&DR) programme. The views and opinions expressed by the authors do not necessarily reflect those of the HS&DR Programme, NIHR, NHS, DH PRP or the Department of Health.



## References

1. Office for National Statistics. Live Births in England and Wales by Characteristics of Mother 1, 2011. November 2013. Available from: [http://www.ons.gov.uk/ons/dcp171778\\_296157.pdf](http://www.ons.gov.uk/ons/dcp171778_296157.pdf).
2. Martin JA, Hamilton BE, Ventura SJ, et al. Births: final data for 2009. *Natl Vital Stat Rep*. 2011;**60**(1):1-70. doi:
3. Biro MA, Davey M-A, Carolan M, et al. Advanced maternal age and obstetric morbidity for women giving birth in Victoria, Australia: A population-based study. *Aust N Z J Obstet Gynaecol*. 2012;**52**(3):229-34. doi: 10.1111/j.1479-828X.2012.01427.x
4. Carolan M. Maternal age  $\geq 45$  years and maternal and perinatal outcomes: A review of the evidence. *Midwifery*. 2013;**29**(5):479-89. doi: 10.1016/j.midw.2012.04.001
5. Delbaere I, Verstraelen H, Goetgeluk S, et al. Pregnancy outcome in primiparae of advanced maternal age. *European Journal of Obstetrics & Gynecology and Reproductive Biology*. 2007;**135**(1):41-6. doi: 10.1016/j.ejogrb.2006.10.030
6. Jolly M, Sebire N, Harris J, et al. The risks associated with pregnancy in women aged 35 years or older. *Hum Reprod*. 2000;**15**(11):2433-7. doi: 10.1093/humrep/15.11.2433
7. Ananth CV, Demissie K, Smulian JC, et al. Placenta previa in singleton and twin births in the United States, 1989 through 1998: A comparison of risk factor profiles and associated conditions. *Am J Obstet Gynecol*. 2003;**188**(1):275-81. doi: 10.1067/mob.2003.10
8. Ananth CV, Wilcox AJ, Savitz DA, et al. Effect of maternal age and parity on the risk of uteroplacental bleeding disorders in pregnancy. *Obstet Gynecol*. 1996;**88**(4, Part 1):511-6. doi: 10.1016/0029-7844(96)00236-0
9. Faiz AS, Ananth CV. Etiology and risk factors for placenta previa: an overview and meta-analysis of observational studies. *Journal of Maternal-Fetal and Neonatal Medicine*. 2003;**13**(3):175-90. doi: 10.1080/jmf.13.3.175.190
10. Jacobsson B, Ladfors L, Milsom I. Advanced Maternal Age and Adverse Perinatal Outcome. *Obstet Gynecol*. 2004;**104**(4):727-33. doi: 10.1097/01.AOG.0000140682.63746.be. doi: 10.1097/01.AOG.0000140682.63746.be

- 1 11. Roos N, Sahlin L, Ekman-Ordeberg G, et al. Maternal risk factors for postterm pregnancy and  
2 cesarean delivery following labor induction. *Acta Obstet Gynecol Scand*. 2010;**89**(8):1003-10. doi:  
3 10.3109/00016349.2010.500009
- 4  
5  
6 12. Knight M, Kurinczuk JJ, Spark P, et al. Inequalities in maternal health: national cohort study  
7 of ethnic variation in severe maternal morbidities. *BMJ*. 2009;**338**:b542. doi: 10.1136/bmj.b542
- 8  
9  
10 13. Huang L, Sauve R, Birkett N, et al. Maternal age and risk of stillbirth: a systematic review.  
11 *Can Med Assoc J*. 2008;**178**(2):165-72. doi: 10.1503/cmaj.070150
- 12  
13  
14 14. Pasupathy D, Wood AM, Pell JP, et al. Advanced maternal age and the risk of perinatal death  
15 due to intrapartum anoxia at term. *J Epidemiol Community Health*. 2011;**65**(3):241-5. doi:  
16 10.1136/jech.2009.097170
- 17  
18  
19 15. Gilbert WM, Nesbitt TS, Danielsen B. Childbearing Beyond Age 40: Pregnancy Outcome in  
20 24,032 Cases. *Obstet Gynecol*. 1999;**93**(1):9-14. doi:  
21  
22  
23 16. Ezra Y, McParland P, Farine D. High delivery intervention rates in nulliparous women over  
24 age 35. *European Journal of Obstetrics & Gynecology and Reproductive Biology*. 1995;**62**(2):203-7.  
25 doi: [http://dx.doi.org/10.1016/0301-2115\(95\)02201-H](http://dx.doi.org/10.1016/0301-2115(95)02201-H)
- 26  
27  
28 17. Gordon D, Milberg J, Daling J, et al. Advanced Maternal Age As a Risk Factor for Cesarean  
29 Delivery. *Obstet Gynecol*. 1991;**77**(4):493-7. doi:  
30  
31  
32 18. Heffner LJ, Elkin E, Fretts RC. Impact of labor induction, gestational age, and maternal age on  
33 cesarean delivery rates. *Obstet Gynecol*. 2003;**102**(2):287-93. doi: 10.1016/S0029-7844(03)00531-3
- 34  
35  
36 19. Patel RR, Peters TJ, Murphy DJ, et al. Prenatal risk factors for Caesarean section. Analyses of  
37 the ALSPAC cohort of 12 944 women in England. *Int J Epidemiol*. 2005;**34**(2):353-67. doi:  
38 10.1093/ije/dyh401
- 39  
40  
41 20. Peipert JF, Bracken MB. Maternal Age: An Independent Risk Factor for Cesarean Delivery.  
42 *Obstet Gynecol*. 1993;**81**(2):200-5. doi:  
43  
44  
45 21. Carolan M. The Graying of the Obstetric Population: Implications for the Older Mother. *J*  
46 *Obstet Gynecol Neonatal Nurs*. 2003;**32**(1):19-27. doi: 10.1177/0884217502239797
- 47  
48  
49 22. National Collaborating Centre for Women's and Children's Health. Intrapartum care of  
50 healthy women and their babies during childbirth. Commissioned by the National Institute for Health  
51 and Clinical Excellence (NICE). London: RCOG press; 2007.
- 52  
53  
54  
55  
56  
57  
58  
59  
60

- 1  
2  
3  
4  
5  
6  
7  
8  
9  
10  
11  
12  
13  
14  
15  
16  
17  
18  
19  
20  
21  
22  
23  
24  
25  
26  
27  
28  
29  
30  
31  
32  
33  
34  
35  
36  
37  
38  
39  
40  
41  
42  
43  
44  
45  
46  
47  
48  
49  
50  
51  
52  
53  
54  
55  
56  
57  
58  
59  
60
23. Hodnett ED, Downe S, Walsh D. Alternative versus conventional institutional settings for birth. *The Cochrane database of systematic reviews*. 2012;**8**:CD000012. doi: 10.1002/14651858.CD000012.pub4
24. Walsh D, Downe SM. Outcomes of free-standing, midwife-led birth centers: a structured review. *Birth*. 2004;**31**(3):222-9. doi: 10.1111/j.0730-7659.2004.00309.x
25. Birthplace in England Collaborative Group. Perinatal and maternal outcomes by planned place of birth for healthy women with low risk pregnancies: the Birthplace in England national prospective cohort study. *BMJ*. 2011;**343**:d7400. doi: 10.1136/bmj.d7400
26. Hollowell J, Puddicombe D, Rowe R, et al. The Birthplace national prospective cohort study: perinatal and maternal outcomes by planned place of birth. Birthplace in England research programme. Final report part 4. NIHR Service Delivery and Organisation programme, 2011.
27. Lindgren HE, Radestad IJ, Christensson K, et al. Outcome of planned home births compared to hospital births in Sweden between 1992 and 2004. A population-based register study. *Acta Obstet Gynecol Scand*. 2008;**87**(7):751-9. doi: 10.1080/00016340802199903
28. Janssen PA, Saxell L, Page LA, et al. Outcomes of planned home birth with registered midwife versus planned hospital birth with midwife or physician. *CMAJ*. 2009;**181**(6-7):377-83. doi: 10.1503/cmaj.081869
29. Rowe RE, Fitzpatrick R, Hollowell J, et al. Transfers of women planning birth in midwifery units: data from the Birthplace prospective cohort study. *BJOG*. 2012;**119**(9):1081-90. doi: 10.1111/j.1471-0528.2012.03414.x
30. Redshaw M, Rowe R, Schroeder L, et al. Mapping maternity care. The configuration of maternity care in England. Birthplace in England research programme. Final report part 3. NIHR Service Delivery and Organisation programme;, 2011.
31. Fan J, Gijbels I. Local Polynomial Modelling and Its Applications. London: Chapman & Hall; 1996.
32. Bayrampour H, Heaman M. Advanced Maternal Age and the Risk of Cesarean Birth: A Systematic Review. *Birth*. 2010;**37**(3):219-26. doi: 10.1111/j.1523-536X.2010.00409.x
33. Bell JS, Campbell DM, Graham WJ, et al. Can obstetric complications explain the high levels of obstetric interventions and maternity service use among older women? A retrospective analysis of routinely collected data. *BJOG*. 2001;**108**(9):910-8. doi: 10.1111/j.1471-0528.2001.00214.x

- 1  
2  
3  
4  
5  
6  
7  
8  
9  
10  
11  
12  
13  
14  
15  
16  
17  
18  
19  
20  
21  
22  
23  
24  
25  
26  
27  
28  
29  
30  
31  
32  
33  
34  
35  
36  
37  
38  
39  
40  
41  
42  
43  
44  
45  
46  
47  
48  
49  
50  
51  
52  
53  
54  
55  
56  
57  
58  
59  
60
34. Main DM, Main EK, Moore li DH. The relationship between maternal age and uterine dysfunction: A continuous effect throughout reproductive life. *Am J Obstet Gynecol*. 2000;**182**(6):1312-20. doi: 10.1067/mob.2000.106249
35. Berkowitz GS, Skovron ML, Lapinski RH, et al. Delayed Childbearing and the Outcome of Pregnancy. *N Engl J Med*. 1990;**322**(10):659-64. doi: 10.1056/NEJM199003083221004
36. Greenberg MB, Cheng YW, Sullivan M, et al. Does length of labor vary by maternal age? *Am J Obstet Gynecol*. 2007;**197**(4):428.e1-.e7. doi: 10.1016/j.ajog.2007.06.058
37. Cnattingius R, Cnattingius S, Notzon FC. Obstacles to reducing cesarean rates in a low-cesarean setting: the effect of maternal age, height, and weight. *Obstet Gynecol*. 1998;**92**(4, Part 1):501-6. doi: 10.1016/s0029-7844(98)00244-0
38. Aasheim V, Waldenstrom U, Rasmussen S, et al. Experience of childbirth in first-time mothers of advanced age - a Norwegian population-based study. *BMC Pregnancy Childbirth*. 2013;**13**:53. doi: 10.1186/1471-2393-13-53
39. Bayrampour H, Heaman M, Duncan KA, et al. Comparison of Perception of Pregnancy Risk of Nulliparous Women of Advanced Maternal Age and Younger Age. *Journal of Midwifery & Women's Health*. 2012;**57**(5):445-53. doi: 10.1111/j.1542-2011.2012.00188.x
40. Carolan M, Frankowska D. Advanced maternal age and adverse perinatal outcome: A review of the evidence. *Midwifery*. 2011;**27**(6):793-801. doi: 10.1016/j.midw.2010.07.006

- 1  
2 (a) Maternal composite, nulliparous women (e) Maternal composite, multiparous women  
3  
4 (b) Augmentation, nulliparous women (f) Augmentation, multiparous women  
5  
6 (c) Instrumental delivery, nulliparous women (g) Instrumental delivery, multiparous women  
7  
8 (d) Intrapartum caesarean section, nulliparous (h) Intrapartum caesarean section, multiparous  
9

10 **Figure 1 Association between maternal age and intrapartum interventions and adverse maternal outcomes**  
11 **in low risk women aged 16 and over<sup>1</sup>**

12 <sup>1</sup> NOTE THAT scales for nulliparous women and multiparous women are different.  
13  
14  
15  
16  
17  
18  
19  
20  
21  
22  
23  
24  
25  
26  
27  
28  
29  
30  
31  
32  
33  
34  
35  
36  
37  
38  
39  
40  
41  
42  
43  
44  
45  
46  
47  
48  
49  
50  
51  
52  
53  
54  
55  
56  
57  
58  
59  
60

For peer review only

1  
2  
3  
4  
5  
6  
7  
8  
9  
10  
11  
12  
13  
14  
15  
16  
17  
18  
19  
20  
21  
22  
23  
24  
25  
26  
27  
28  
29  
30  
31  
32  
33  
34  
35  
36  
37  
38  
39  
40  
41  
42  
43  
44  
45  
46  
47  
48  
49  
50  
51  
52  
53  
54  
55  
56  
57  
58  
59  
60

- (a) Perinatal composite, nulliparous women
- (b) Perinatal composite, multiparous women

**Figure 2 Association between maternal age and perinatal composite outcome in low risk women aged 16 and over**

For peer review only

**Table 1 Characteristics of low risk women aged 16 and over by maternal age category**

|                                            | 16 - 19 years |                | 20 - 24 years |                | 25 - 29 years |                | 30 - 34 years |                | 35 - 39 years |                | ≥ 40 years |                |
|--------------------------------------------|---------------|----------------|---------------|----------------|---------------|----------------|---------------|----------------|---------------|----------------|------------|----------------|
|                                            | n=3354        |                | n=11395       |                | n=18091       |                | n=18453       |                | n=10397       |                | n=1681     |                |
|                                            | n             | % <sup>1</sup> | n          | % <sup>1</sup> |
| <b>Ethnic group</b>                        |               |                |               |                |               |                |               |                |               |                |            |                |
| White                                      | 3078          | 90.1           | 9685          | 81.2           | 15146         | 77.5           | 16052         | 80.7           | 9339          | 84.3           | 1527       | 86.6           |
| Non-white                                  | 275           | 9.9            | 1697          | 18.8           | 2920          | 22.5           | 2375          | 19.3           | 1044          | 15.8           | 153        | 13.4           |
| Missing                                    | 1             |                | 13            |                | 25            |                | 26            |                | 14            |                | 1          |                |
| <b>Understanding of English</b>            |               |                |               |                |               |                |               |                |               |                |            |                |
| Fluent                                     | 3254          | 96.7           | 10394         | 89.6           | 16757         | 90.0           | 17605         | 92.9           | 10155         | 96.3           | 1638       | 96.7           |
| Not fluent                                 | 94            | 3.3            | 948           | 10.4           | 1251          | 10.0           | 776           | 7.1            | 214           | 3.7            | 36         | 3.4            |
| Missing                                    | 6             |                | 53            |                | 83            |                | 72            |                | 28            |                | 7          |                |
| <b>Marital/partner status</b>              |               |                |               |                |               |                |               |                |               |                |            |                |
| Married/living with partner                | 1836          | 51.9           | 9550          | 81.8           | 16868         | 92.1           | 17782         | 96.1           | 10004         | 95.4           | 1591       | 94.4           |
| Single/unsupported by partner              | 1440          | 48.1           | 1677          | 18.2           | 1010          | 7.9            | 493           | 3.9            | 293           | 4.7            | 68         | 5.7            |
| Missing                                    | 78            |                | 168           |                | 213           |                | 178           |                | 100           |                | 22         |                |
| <b>BMI in pregnancy (kg/m<sup>2</sup>)</b> |               |                |               |                |               |                |               |                |               |                |            |                |
| < 18.5                                     | 184           | 6.2            | 426           | 4.2            | 413           | 2.6            | 337           | 2.1            | 156           | 1.5            | 18         | 0.2            |
| 18.5 - 24.9                                | 1753          | 50.3           | 5316          | 45.6           | 8560          | 45.9           | 9059          | 46.7           | 4864          | 44.5           | 802        | 46.4           |
| 25.0 - 29.9                                | 598           | 17.9           | 2558          | 21.7           | 4341          | 24.6           | 4206          | 23.2           | 2572          | 26.9           | 415        | 27.6           |
| 30.0 - 35.0                                | 233           | 7.6            | 1096          | 10.0           | 1627          | 9.3            | 1399          | 8.8            | 769           | 8.9            | 109        | 8.1            |
| Not recorded                               | 581           | 18.1           | 1969          | 18.4           | 3091          | 17.6           | 3389          | 19.2           | 2000          | 18.3           | 329        | 17.7           |
| Missing                                    | 5             |                | 30            |                | 59            |                | 63            |                | 36            |                | 8          |                |
| <b>IMD quintile</b>                        |               |                |               |                |               |                |               |                |               |                |            |                |
| 1 <sup>st</sup> (Least deprived)           | 245           | 6.8            | 1102          | 8.5            | 2875          | 13.8           | 4255          | 20.5           | 2783          | 24.6           | 434        | 26.0           |
| 2 <sup>nd</sup>                            | 405           | 12.3           | 1521          | 13.3           | 3259          | 17.5           | 4114          | 21.7           | 2434          | 22.3           | 396        | 22.0           |
| 3 <sup>rd</sup>                            | 637           | 18.2           | 2115          | 18.0           | 3657          | 18.6           | 3759          | 19.7           | 2135          | 20.0           | 357        | 21.6           |
| 4 <sup>th</sup>                            | 827           | 25.3           | 2784          | 23.9           | 3957          | 22.7           | 3479          | 19.8           | 1765          | 17.9           | 291        | 16.9           |
| 5 <sup>th</sup> (Most deprived)            | 1221          | 37.5           | 3821          | 36.2           | 4262          | 27.5           | 2759          | 18.4           | 1215          | 15.2           | 197        | 13.7           |
| Missing                                    | 19            |                | 52            |                | 81            |                | 87            |                | 65            |                | 6          |                |
| <b>Previous pregnancies ≥ 24 weeks</b>     |               |                |               |                |               |                |               |                |               |                |            |                |

|                                                                          |      |      |      |      |      |      |      |      |      |      |     |      |
|--------------------------------------------------------------------------|------|------|------|------|------|------|------|------|------|------|-----|------|
| 0                                                                        | 2835 | 86.8 | 6341 | 62.0 | 8438 | 53.6 | 7307 | 46.7 | 2989 | 36.9 | 346 | 28.0 |
| 1                                                                        | 474  | 12.1 | 3772 | 29.4 | 5892 | 29.9 | 6963 | 33.9 | 3929 | 35.5 | 540 | 32.3 |
| 2                                                                        | 38   | 0.8  | 1006 | 6.8  | 2549 | 10.9 | 2779 | 12.2 | 2260 | 17.4 | 414 | 20.2 |
| 3-5                                                                      | 7    | 0.3  | 276  | 1.9  | 1212 | 5.6  | 1404 | 7.2  | 1219 | 10.2 | 381 | 19.5 |
| Missing                                                                  |      |      |      |      |      |      |      |      |      |      |     |      |
| <b>Gestation at delivery (completed weeks)</b>                           |      |      |      |      |      |      |      |      |      |      |     |      |
| 37                                                                       | 119  | 4.1  | 351  | 3.5  | 530  | 3.6  | 534  | 3.5  | 275  | 3.1  | 52  | 3.2  |
| 38                                                                       | 305  | 11.0 | 1136 | 10.1 | 1743 | 9.9  | 1739 | 9.9  | 971  | 10.2 | 146 | 9.9  |
| 39                                                                       | 783  | 22.5 | 2788 | 24.4 | 4409 | 24.2 | 4439 | 23.5 | 2516 | 23.2 | 410 | 27.2 |
| 40                                                                       | 1292 | 36.7 | 4361 | 36.7 | 6970 | 36.2 | 7090 | 37.5 | 3933 | 35.9 | 639 | 35.0 |
| 41 - 42+0 days                                                           | 855  | 25.7 | 2759 | 25.3 | 4439 | 26.1 | 4651 | 25.6 | 2702 | 27.7 | 434 | 24.7 |
| <b>Planned place of birth</b>                                            |      |      |      |      |      |      |      |      |      |      |     |      |
| OU                                                                       | 1445 | 87.5 | 4150 | 84.9 | 5601 | 82.6 | 4946 | 80.7 | 2571 | 80.2 | 497 | 83.2 |
| AMU                                                                      | 1038 | 8.5  | 3445 | 9.6  | 4958 | 10.1 | 4540 | 10.3 | 2212 | 9.6  | 294 | 7.9  |
| FMU                                                                      | 661  | 3.2  | 2115 | 3.5  | 3242 | 3.8  | 3216 | 3.9  | 1674 | 3.8  | 249 | 3.0  |
| Home                                                                     | 210  | 0.8  | 1685 | 2.0  | 4290 | 3.5  | 5751 | 5.1  | 3940 | 6.4  | 641 | 5.8  |
| <b>Birth weight (grams)</b>                                              |      |      |      |      |      |      |      |      |      |      |     |      |
| < 2500                                                                   | 53   | 1.9  | 146  | 1.8  | 166  | 1.4  | 159  | 1.1  | 75   | 1.0  | 17  | 1.3  |
| 2500 - 2999                                                              | 561  | 18.4 | 1728 | 16.4 | 2281 | 14.5 | 1924 | 12.7 | 1100 | 12.5 | 168 | 12.8 |
| 3000 - 3499                                                              | 1502 | 44.6 | 4678 | 41.1 | 7171 | 39.3 | 6960 | 38.2 | 3644 | 36.5 | 596 | 37.1 |
| 3500 - 3999                                                              | 977  | 28.4 | 3664 | 30.9 | 6256 | 33.4 | 6767 | 35.0 | 3888 | 35.3 | 617 | 36.9 |
| 4000 - 4499                                                              | 233  | 6.0  | 1023 | 8.7  | 1926 | 10.0 | 2294 | 11.4 | 1432 | 12.5 | 239 | 9.9  |
| ≥ 4500                                                                   | 21   | 0.7  | 135  | 1.2  | 262  | 1.5  | 303  | 1.6  | 237  | 2.3  | 40  | 2.0  |
| Missing                                                                  | 7    |      | 21   |      | 29   |      | 46   |      | 21   |      | 4   |      |
| <b>Complicating conditions identified at the start of care in labour</b> |      |      |      |      |      |      |      |      |      |      |     |      |
| Prolonged rupture of membranes > 18 hours                                | 145  | 7.1  | 411  | 6.1  | 678  | 6.5  | 706  | 7.1  | 415  | 7.0  | 78  | 8.9  |
| Meconium stained liquor                                                  | 126  | 5.8  | 322  | 4.8  | 469  | 5.0  | 541  | 6.1  | 295  | 5.9  | 60  | 7.4  |
| Proteinuria 1+ or more                                                   | 79   | 2.3  | 203  | 1.7  | 261  | 1.9  | 226  | 1.6  | 109  | 1.7  | 20  | 1.6  |
| Hypertension                                                             | 55   | 2.6  | 160  | 2.2  | 232  | 2.4  | 207  | 2.0  | 102  | 2.1  | 17  | 2.0  |
| Abnormal vaginal bleeding                                                | 16   | 0.7  | 57   | 0.9  | 79   | 0.9  | 119  | 1.5  | 77   | 2.1  | 16  | 2.1  |



|                                   |            |             |             |             |             |             |             |             |             |             |            |             |
|-----------------------------------|------------|-------------|-------------|-------------|-------------|-------------|-------------|-------------|-------------|-------------|------------|-------------|
| Non-cephalic presentation         | 5          | 0.2         | 31          | 0.5         | 44          | 0.4         | 64          | 0.5         | 46          | 0.7         | 3          | 0.3         |
| Abnormal fetal heart rate         | 41         | 1.5         | 106         | 1.7         | 162         | 1.8         | 143         | 1.7         | 82          | 1.7         | 27         | 3.0         |
| Other complications               | 14         | 0.6         | 24          | 0.3         | 23          | 0.2         | 27          | 0.1         | 11          | 0.2         | 2          | 0.2         |
| <b>Any complicating condition</b> | <b>431</b> | <b>18.5</b> | <b>1175</b> | <b>16.1</b> | <b>1744</b> | <b>16.6</b> | <b>1829</b> | <b>18.0</b> | <b>1001</b> | <b>18.1</b> | <b>199</b> | <b>22.5</b> |

<sup>1</sup> Probability weights are incorporated to account for differences in the probability of a woman being selected for inclusion in the study arising from differences in each unit/trust's period of participation and the stratum specific probabilities of selection of OUs.

1  
2  
3  
4  
5  
6  
7  
8  
9  
10  
11  
12  
13  
14  
15  
16  
17  
18  
19  
20  
21  
22  
23  
24  
25  
26  
27  
28  
29  
30  
31  
32  
33  
34  
35  
36  
37  
38  
39  
40  
41  
42  
43  
44  
45  
46  
47  
48  
49

**Table 2 Association between maternal age (per 5-year increase) and maternal and perinatal outcomes in low risk women aged between 16 and 40 years old (inclusive)**

|                                          | Nulliparous women                           |             |                         |             | Multiparous women                          |             |                         |             |
|------------------------------------------|---------------------------------------------|-------------|-------------------------|-------------|--------------------------------------------|-------------|-------------------------|-------------|
|                                          | Unadjusted <sup>1</sup>                     |             | Adjusted <sup>1,2</sup> |             | Unadjusted <sup>1</sup>                    |             | Adjusted <sup>1,2</sup> |             |
|                                          | RR                                          | (95% CI)    | RR                      | (95% CI)    | RR                                         | (95% CI)    | RR                      | (95% CI)    |
| Maternal composite                       | 1.13                                        | (1.11-1.16) | 1.13                    | (1.11-1.16) | 1.07                                       | (1.03-1.13) | 1.08                    | (1.03-1.14) |
| OU                                       | 1.13                                        | (1.11-1.16) | 1.12                    | (1.10-1.15) |                                            |             |                         |             |
| Non-OU <sup>1,3</sup>                    | 1.22                                        | (1.19-1.26) | 1.21                    | (1.18-1.25) |                                            |             |                         |             |
|                                          | Wald test for interaction $P^{1,4} < 0.001$ |             |                         |             | Wald test for interaction $P^{1,4} = 0.34$ |             |                         |             |
| Augmentation                             | 1.13                                        | (1.09-1.16) | 1.12                    | (1.08-1.17) | 1.00                                       | (0.92-1.08) | 1.01                    | (0.92-1.11) |
| OU                                       | 1.13                                        | (1.09-1.17) | 1.12                    | (1.07-1.17) |                                            |             |                         |             |
| Non-OU <sup>1,3</sup>                    | 1.25                                        | (1.20-1.31) | 1.23                    | (1.18-1.28) |                                            |             |                         |             |
|                                          | Wald test for interaction $P^{1,4} < 0.001$ |             |                         |             | Wald test for interaction $P^{1,4} = 0.24$ |             |                         |             |
| Instrumental delivery                    | 1.20                                        | (1.13-1.26) | 1.18                    | (1.12-1.25) | 1.14                                       | (1.04-1.25) | 1.15                    | (1.05-1.27) |
|                                          | Wald test for interaction $P^{1,4} = 0.18$  |             |                         |             | Wald test for interaction $P^{1,4} = 0.06$ |             |                         |             |
| Intrapartum caesarean section            | 1.27                                        | (1.23-1.31) | 1.27                    | (1.23-1.32) | 1.16                                       | (1.07-1.26) | 1.16                    | (1.06-1.28) |
|                                          | Wald test for interaction $P^{1,4} = 0.26$  |             |                         |             | Wald test for interaction $P^{1,4} = 0.50$ |             |                         |             |
| General anaesthesia                      | 1.06                                        | (0.93-1.20) | 1.06                    | (0.92-1.22) | 1.05                                       | (0.87-1.27) | 1.09                    | (0.91-1.32) |
|                                          | Wald test for interaction $P^{1,4} = 0.83$  |             |                         |             | Wald test for interaction $P^{1,4} = 0.15$ |             |                         |             |
| Maternal blood transfusion               | 1.09                                        | (0.97-1.23) | 1.13                    | (0.95-1.34) | 1.23                                       | (0.95-1.60) | 1.24                    | (0.94-1.62) |
|                                          | Wald test for interaction $P^{1,4} = 0.38$  |             |                         |             | Wald test for interaction $P^{1,4} = 0.44$ |             |                         |             |
| Third/fourth degree perineal tear        | 1.17                                        | (1.09-1.27) | 1.12                    | (1.02-1.23) | 1.10                                       | (0.98-1.23) | 1.01                    | (0.89-1.15) |
|                                          | Wald test for interaction $P^{1,4} = 0.43$  |             |                         |             | Wald test for interaction $P^{1,4} = 0.29$ |             |                         |             |
| Maternal admission for higher level care | 1.28                                        | (1.03-1.58) | 1.46                    | (1.07-1.99) | 1.40                                       | (1.01-1.92) | 1.49                    | (1.06-2.10) |
|                                          | Wald test for interaction $P^{1,4} = 0.41$  |             |                         |             | Wald test for interaction $P^{1,4} = 0.15$ |             |                         |             |
| Perinatal composite                      | 1.07                                        | (0.97-1.17) | 1.06                    | (0.95-1.17) | 1.02                                       | (0.87-1.19) | 0.98                    | (0.84-1.15) |
|                                          | Wald test for interaction $P^{1,4} = 0.92$  |             |                         |             | Wald test for interaction $P^{1,4} = 0.66$ |             |                         |             |

1  
2  
3  
4  
5 <sup>1</sup> Probability weights are incorporated to account for differences in the probability of a woman being selected for inclusion in the study arising from  
6 differences in each unit/trust's period of participation and the stratum specific probabilities of selection of OUs.  
7

8 <sup>2</sup> Adjusted for ethnic group, understanding of English, marital/partner status, BMI in pregnancy, index of multiple deprivation score quintile, gestation at  
9 delivery, and planned place of birth (OU vs. AMU vs. FMU vs. home).  
10

11 <sup>3</sup> Results in these rows were adjusted for ethnic group, understanding of English, marital/partner status, BMI in pregnancy, index of multiple deprivation  
12 score quintile, and gestation at delivery.  
13

14 <sup>4</sup> P for interaction, results in these rows were adjusted for ethnic group, understanding of English, marital/partner status, BMI in pregnancy, index of  
15 multiple deprivation score quintile, gestation at delivery, and planned place of birth (OU vs. non-OU).  
16  
17  
18  
19  
20  
21  
22  
23  
24  
25  
26  
27  
28  
29  
30  
31  
32  
33  
34  
35  
36  
37  
38  
39  
40  
41  
42  
43  
44  
45  
46  
47  
48  
49

**Table 3 Intrapartum interventions and adverse maternal outcomes by maternal age in low risk nulliparous women aged 16 and over**

| Age (years)                          | Events / Births<br>n/N | OU                         |             | Events / Births<br>n/N | Non-OU                     |             |
|--------------------------------------|------------------------|----------------------------|-------------|------------------------|----------------------------|-------------|
|                                      |                        | Weighted <sup>1</sup><br>% | (95% CI)    |                        | Weighted <sup>1</sup><br>% | (95% CI)    |
| <b>Maternal composite</b>            |                        |                            |             |                        |                            |             |
| 16-19                                | 480/1239               | 39.4                       | (35.6-43.3) | 252/1553               | 17.5                       | (15.2-20.1) |
| 20-24                                | 1229/2577              | 47.9                       | (44.7-51.1) | 886/3679               | 24.2                       | (21.8-26.8) |
| 25-29                                | 1670/3003              | 55.6                       | (53.4-57.9) | 1680/5354              | 32.3                       | (29.5-35.2) |
| 30-34                                | 1402/2322              | 61.1                       | (57.3-64.8) | 1730/4897              | 36.6                       | (34.2-39.1) |
| 35-39                                | 622/957                | 65.5                       | (61.8-69.1) | 792/1995               | 39.9                       | (36.0-43.9) |
| 40+                                  | 108/148                | 71.9                       | (63.0-79.3) | 83/196                 | 44.8                       | (35.2-54.7) |
| Total                                | 5511/10246             | 54.4                       | (51.9-56.9) | 5423/17674             | 31.3                       | (29.3-33.4) |
| <b>Augmentation</b>                  |                        |                            |             |                        |                            |             |
| 16-19                                | 317/1245               | 25.9                       | (22.5-29.7) | 141/1564               | 8.6                        | (7.0-10.5)  |
| 20-24                                | 790/2584               | 30.7                       | (26.9-34.7) | 489/3706               | 12.9                       | (11.1-14.9) |
| 25-29                                | 1079/3011              | 35.7                       | (33.4-38.1) | 918/5372               | 17.4                       | (15.6-19.3) |
| 30-34                                | 867/2318               | 37.5                       | (34.1-41.1) | 964/4921               | 19.9                       | (18.3-21.7) |
| 35-39                                | 402/955                | 42.2                       | (36.4-48.1) | 473/2015               | 22.6                       | (19.8-25.7) |
| 40+                                  | 71/149                 | 47.6                       | (37.0-58.4) | 44/196                 | 23.7                       | (15.7-34.1) |
| Total                                | 3526/10262             | 34.6                       | (31.9-37.4) | 3029/17774             | 16.9                       | (15.7-18.1) |
| <b>Instrumental delivery</b>         |                        |                            |             |                        |                            |             |
| 16-19                                | 191/1266               | 15.1                       | (12.5-18.2) | 99/1568                | 7.9                        | (6.2-10.2)  |
| 20-24                                | 469/2618               | 17.9                       | (15.9-20.0) | 392/3717               | 10.6                       | (8.9-12.5)  |
| 25-29                                | 707/3039               | 23.4                       | (21.3-25.6) | 772/5391               | 15.0                       | (13.1-17.0) |
| 30-34                                | 591/2349               | 26.3                       | (21.3-32.1) | 795/4950               | 17.0                       | (15.2-19.1) |
| 35-39                                | 275/968                | 29.5                       | (25.0-34.4) | 401/2018               | 19.4                       | (15.9-23.6) |
| 40+                                  | 41/149                 | 30.4                       | (20.0-43.2) | 37/197                 | 21.0                       | (13.3-31.5) |
| Total                                | 2274/10389             | 22.5                       | (19.9-25.3) | 2496/17841             | 14.5                       | (13.0-16.0) |
| <b>Intrapartum caesarean section</b> |                        |                            |             |                        |                            |             |
| 16-19                                | 101/1266               | 8.3                        | (6.5-10.5)  | 55/1568                | 3.3                        | (2.5-4.2)   |
| 20-24                                | 313/2618               | 12.2                       | (10.4-14.2) | 194/3717               | 5.2                        | (4.2-6.5)   |
| 25-29                                | 461/3039               | 15.2                       | (13.3-17.2) | 408/5391               | 8.0                        | (6.9-9.3)   |
| 30-34                                | 466/2349               | 19.8                       | (17.5-22.3) | 452/4950               | 9.0                        | (7.9-10.4)  |
| 35-39                                | 223/968                | 23.0                       | (19.8-26.5) | 212/2018               | 11.2                       | (9.0-13.9)  |
| 40+                                  | 47/149                 | 29.2                       | (20.9-39.3) | 22/197                 | 9.7                        | (5.2-17.2)  |
| Total                                | 1611/10389             | 15.7                       | (14.1-17.5) | 1343/17841             | 7.6                        | (6.8-8.4)   |

<sup>1</sup> Probability weights are incorporated to account for differences in the probability of a woman being selected for inclusion in the study arising from differences in each unit/trust's period of participation and the stratum specific probabilities of selection of OUs.

**Table 4 Relative risk for non-OU compared to OU by age groups in nulliparous women**

| Age (years)               | Unadjusted RR <sup>1</sup><br>(95% CI) | Adjusted RR <sup>1,2</sup> (95% CI) | Adjusted RR <sup>1,3</sup> (95% CI) |
|---------------------------|----------------------------------------|-------------------------------------|-------------------------------------|
| <b>Maternal composite</b> |                                        |                                     |                                     |
| 16-19                     | 0.44 (0.38-0.53)                       | 0.45 (0.38-0.54)                    | 0.49 (0.42-0.58)                    |
| 20-24                     | 0.51 (0.45-0.57)                       | 0.51 (0.45-0.58)                    | 0.55 (0.49-0.62)                    |
| 25-29                     | 0.58 (0.53-0.64)                       | 0.59 (0.54-0.65)                    | 0.63 (0.57-0.70)                    |
| 30-34                     | 0.60 (0.55-0.66)                       | 0.61 (0.56-0.67)                    | 0.66 (0.60-0.73)                    |
| 35-39                     | 0.61 (0.54-0.68)                       | 0.62 (0.56-0.69)                    | 0.68 (0.61-0.76)                    |
| 40+                       | 0.62 (0.49-0.80)                       | 0.66 (0.51-0.87)                    | 0.70 (0.53-0.93)                    |
| <b>Augmentation</b>       |                                        |                                     |                                     |
| 16-19                     | 0.33 (0.26-0.42)                       | 0.34 (0.27-0.44)                    | 0.37 (0.29-0.47)                    |
| 20-24                     | 0.42 (0.35-0.51)                       | 0.43 (0.35-0.52)                    | 0.47 (0.39-0.57)                    |
| 25-29                     | 0.49 (0.43-0.55)                       | 0.50 (0.45-0.57)                    | 0.56 (0.49-0.63)                    |
| 30-34                     | 0.53 (0.47-0.60)                       | 0.55 (0.48-0.63)                    | 0.61 (0.53-0.71)                    |
| 35-39                     | 0.54 (0.44-0.65)                       | 0.54 (0.46-0.64)                    | 0.61 (0.51-0.74)                    |
| 40+                       | 0.50 (0.32-0.78)                       | 0.53 (0.33-0.84)                    | 0.58 (0.36-0.94)                    |

<sup>1</sup> Probability weights are incorporated to account for differences in the probability of a woman being selected for inclusion in the study arising from differences in each unit/trust's period of participation and the stratum specific probabilities of selection of OUs.

<sup>2</sup> Adjusted for ethnic group, understanding of English, marital/partner status, BMI in pregnancy, index of multiple deprivation score quintile, and gestation at delivery.

<sup>3</sup> Adjusted for ethnic group, understanding of English, marital/partner status, BMI in pregnancy, index of multiple deprivation score quintile, gestation at delivery, and complicating conditions identified at the start of care in labour.

**Table 5 Intrapartum interventions and adverse maternal outcomes by maternal age in low risk multiparous women aged 16 and over**

| Age (years)                          | Events / Births<br>n/N | OU                         |             | Events / Births<br>n/N | Non-OU                     |            |
|--------------------------------------|------------------------|----------------------------|-------------|------------------------|----------------------------|------------|
|                                      |                        | Weighted <sup>1</sup><br>% | (95% CI)    |                        | Weighted <sup>1</sup><br>% | (95% CI)   |
| <b>Maternal composite</b>            |                        |                            |             |                        |                            |            |
| 16-19                                | 35/177                 | 20.2                       | (14.1-28.0) | 20/338                 | 6.6                        | (4.1-10.6) |
| 20-24                                | 242/1506               | 16.2                       | (13.8-19.0) | 146/3486               | 4.6                        | (3.6-5.8)  |
| 25-29                                | 468/2504               | 18.9                       | (16.9-20.9) | 297/6989               | 4.8                        | (4.1-5.7)  |
| 30-34                                | 492/2548               | 19.2                       | (16.8-21.8) | 418/8440               | 5.4                        | (4.7-6.2)  |
| 35-39                                | 344/1575               | 21.9                       | (19.4-24.7) | 273/5737               | 5.6                        | (4.8-6.6)  |
| 40+                                  | 82/340                 | 24.1                       | (20.7-28.0) | 65/975                 | 7.4                        | (5.6-9.7)  |
| Total                                | 1663/8650              | 19.3                       | (17.6-21.1) | 1219/25965             | 5.3                        | (4.7-5.9)  |
| <b>Augmentation</b>                  |                        |                            |             |                        |                            |            |
| 16-19                                | 19/178                 | 10.5                       | (5.9-17.9)  | 11/340                 | 3.8                        | (2.0-7.1)  |
| 20-24                                | 144/1516               | 9.4                        | (7.5-11.8)  | 62/3520                | 2.0                        | (1.4-2.7)  |
| 25-29                                | 247/2529               | 9.9                        | (8.2-12.0)  | 109/7077               | 1.8                        | (1.4-2.3)  |
| 30-34                                | 255/2572               | 9.7                        | (8.0-11.7)  | 132/8535               | 1.6                        | (1.3-2.0)  |
| 35-39                                | 156/1592               | 9.8                        | (8.2-11.6)  | 89/5796                | 1.8                        | (1.3-2.5)  |
| 40+                                  | 42/345                 | 12.2                       | (9.5-15.5)  | 18/985                 | 1.8                        | (1.1-3.2)  |
| Total                                | 863/8732               | 9.8                        | (8.5-11.4)  | 421/26253              | 1.8                        | (1.5-2.1)  |
| <b>Instrumental delivery</b>         |                        |                            |             |                        |                            |            |
| 16-19                                | 12/179                 | 7.5                        | (3.6-14.9)  | 7/340                  | 3.1                        | (1.3-7.1)  |
| 20-24                                | 55/1530                | 3.6                        | (2.7-4.9)   | 38/3520                | 1.4                        | (1.0-2.0)  |
| 25-29                                | 139/2557               | 5.5                        | (4.6-6.5)   | 102/7092               | 1.8                        | (1.4-2.3)  |
| 30-34                                | 159/2594               | 6.1                        | (5.0-7.5)   | 124/8544               | 1.6                        | (1.2-2.0)  |
| 35-39                                | 102/1600               | 6.6                        | (5.0-8.6)   | 82/5802                | 1.8                        | (1.4-2.4)  |
| 40+                                  | 30/347                 | 8.8                        | (5.5-13.8)  | 17/987                 | 2.5                        | (1.3-4.7)  |
| Total                                | 497/8807               | 5.7                        | (4.9-6.7)   | 370/26285              | 1.7                        | (1.4-2.1)  |
| <b>Intrapartum caesarean section</b> |                        |                            |             |                        |                            |            |
| 16-19                                | 6/179                  | 3.4                        | (1.4-7.7)   | 4/340                  | 0.9                        | (0.3-2.5)  |
| 20-24                                | 62/1530                | 4.1                        | (2.6-6.3)   | 21/3520                | 0.6                        | (0.3-1.1)  |
| 25-29                                | 121/2557               | 4.8                        | (3.8-6.1)   | 48/7092                | 0.7                        | (0.5-0.9)  |
| 30-34                                | 134/2594               | 5.1                        | (4.0-6.5)   | 70/8544                | 0.9                        | (0.6-1.2)  |
| 35-39                                | 110/1600               | 6.8                        | (5.1-9.1)   | 53/5802                | 1.1                        | (0.8-1.5)  |
| 40+                                  | 16/347                 | 4.8                        | (3.1-7.4)   | 15/987                 | 1.5                        | (0.8-2.7)  |
| Total                                | 449/8807               | 5.1                        | (4.2-6.3)   | 211/26285              | 0.8                        | (0.7-1.1)  |

<sup>1</sup> Probability weights are incorporated to account for differences in the probability of a woman being selected for inclusion in the study arising from differences in each unit/trust's period of participation and the stratum specific probabilities of selection of OUs.

Table 6 Perinatal outcomes by maternal age in low risk women aged 16 and over

| Age (years)        | OU                     |                                     | Non-OU                 |                                     |
|--------------------|------------------------|-------------------------------------|------------------------|-------------------------------------|
|                    | Events / Births<br>n/N | Weighted <sup>1</sup><br>% (95% CI) | Events / Births<br>n/N | Weighted <sup>1</sup><br>% (95% CI) |
| <b>Nulliparous</b> |                        |                                     |                        |                                     |
| 16-19              | 39/1260                | 3.2 (2.2-4.5)                       | 31/1553                | 2.9 (1.9-4.4)                       |
| 20-24              | 89/2610                | 3.5 (2.5-5.0)                       | 94/3700                | 2.4 (1.9-3.2)                       |
| 25-29              | 92/3026                | 3.3 (2.6-4.0)                       | 123/5357               | 2.1 (1.7-2.8)                       |
| 30-34              | 101/2340               | 4.2 (3.1-5.6)                       | 128/4918               | 3.0 (2.2-4.0)                       |
| 35-39              | 37/962                 | 3.9 (2.8-5.4)                       | 65/1999                | 3.0 (2.1-4.1)                       |
| 40+                | 10/149                 | 7.5 (3.4-15.7)                      | 8/195                  | 3.9 (1.0-14.0)                      |
| Total              | 368/10347              | 3.7 (2.9-4.6)                       | 449/17722              | 2.6 (2.2-3.1)                       |
| <b>Multiparous</b> |                        |                                     |                        |                                     |
| 16-19              | 6/179                  | 3.0 (1.4-6.4)                       | 5/337                  | 1.7 (0.6-4.6)                       |
| 20-24              | 26/1519                | 1.8 (1.2-2.7)                       | 43/3489                | 1.3 (0.8-2.0)                       |
| 25-29              | 41/2547                | 1.6 (1.2-2.3)                       | 73/7032                | 1.1 (0.8-1.6)                       |
| 30-34              | 50/2578                | 2.0 (1.5-2.6)                       | 111/8468               | 1.2 (1.0-1.5)                       |
| 35-39              | 33/1594                | 2.1 (1.3-3.3)                       | 88/5761                | 1.6 (1.2-2.2)                       |
| 40+                | 7/345                  | 2.1 (0.9-4.6)                       | 20/978                 | 2.3 (1.3-4.1)                       |
| Total              | 163/8762               | 1.9 (1.5-2.4)                       | 340/26065              | 1.3 (1.1-1.6)                       |

<sup>1</sup> Probability weights are incorporated to account for differences in the probability of a woman being selected for inclusion in the study arising from differences in each unit/trust's period of participation and the stratum specific probabilities of selection of OUs.

1  
2  
3 **The effect of maternal age and planned place of birth on intrapartum**  
4 **outcomes in healthy women with straightforward pregnancies:**  
5 **secondary analysis of the Birthplace national prospective cohort**  
6 **study**  
7  
8  
9

10  
11  
12  
13  
14 **Authors**

15  
16  
17 Yangmei Li,<sup>1</sup> John Townend,<sup>1</sup> Rachel Rowe,<sup>1</sup> Marian Knight,<sup>1</sup> Peter Brocklehurst,<sup>2</sup> Jennifer Hollowell<sup>1</sup>

18  
19  
20 <sup>1</sup> Policy Research Unit in Maternal Health and Care, National Perinatal Epidemiology Unit, Nuffield  
21 Department of Population Health, University of Oxford, Oxford, UK  
22

23  
24 <sup>2</sup> Institute for Women's Health, University College London, London, UK  
25  
26  
27  
28

29 **Corresponding author**

30  
31  
32 Jennifer Hollowell PhD, Policy Research Unit in Maternal Health and Care, National Perinatal  
33 Epidemiology Unit, Nuffield Department of Population Health, University of Oxford, Old Road  
34 Campus, Headington, Oxford, OX3 7LF, United Kingdom  
35

36  
37  
38 Tel: +44 (0)1865 289452 (direct)/289700 (messages)

39  
40 Fax: +44 (0)1865 289701

41  
42  
43 Email: [jennifer.hollowell@npeu.ox.ac.uk](mailto:jennifer.hollowell@npeu.ox.ac.uk)  
44

45 **Keywords**

46  
47  
48 Maternal age, parity, birthing centre, home birth, augmentation, instrumental delivery, caesarean  
49 section, adverse maternal outcomes, adverse perinatal outcomes  
50  
51

52 **Word count**

53  
54  
55 Main text 4,630 words  
56  
57  
58  
59  
60



## Abstract

### Objectives

To describe the relationship between maternal age and intrapartum outcomes in 'low risk' women; and to evaluate whether the relationship between maternal age and intrapartum interventions and adverse outcomes differs by planned place of birth

### Design

Prospective cohort study

### Setting

Obstetric units, midwifery units and planned home births in England

### Participants

63,371 women aged over 16 without known medical or obstetric risk factors, with singleton pregnancies, planning vaginal birth

### Methods

Log Poisson regression was used to evaluate the association between maternal age, modelled as a continuous and categorical variable, and risk of intrapartum interventions and adverse maternal and perinatal outcomes.

### Main Outcome Measures

Intrapartum caesarean section, instrumental delivery, syntocinon augmentation and a composite measure of maternal interventions/adverse outcomes requiring obstetric care encompassing augmentation, instrumental delivery, intrapartum caesarean section, general anaesthesia, blood transfusion, 3<sup>rd</sup>/4<sup>th</sup> degree tear, maternal admission; adverse perinatal outcome (encompassing neonatal unit admission or perinatal death).

### Results

Interventions and adverse maternal outcomes requiring obstetric care generally increased with age, particularly in nulliparous women. For nulliparous women aged 16-40, the risk of experiencing an intervention or adverse outcome requiring obstetric care increased more steeply with age in planned non-obstetric unit births than in planned obstetric unit births (adjusted RR 1.21 per 5-year

1 increase in age, 95% CI 1.18-1.25 vs. adjusted RR 1.12, 95% CI 1.10-1.15) but absolute risks were  
2 lower in planned non-OU births at all ages. The risk of neonatal unit admission or perinatal death  
3 was significantly raised in nulliparous women aged 40+ relative to women aged 25-29 (adjusted RR  
4 2.29, 95% CI 1.28-4.09).  
5  
6  
7

## 8 **Conclusions**

9  
10 At all ages 'low risk' women who plan birth in a non-obstetric unit setting tend to experience lower  
11 intervention rates than comparable women who plan birth in an OU. Younger nulliparous women  
12 appear to benefit more from this reduction than older nulliparous women.  
13  
14  
15  
16  
17  
18  
19  
20  
21  
22  
23  
24  
25  
26  
27  
28  
29  
30  
31  
32  
33  
34  
35  
36  
37  
38  
39  
40  
41  
42  
43  
44  
45  
46  
47  
48  
49  
50  
51  
52  
53  
54  
55  
56  
57  
58  
59  
60

## Article summary

### Article focus

- Does increasing age in women without known medical or obstetric risk factors increase the risk of intrapartum interventions and adverse outcomes that might affect their choice of planned place of birth?

### Key messages

- At all ages 'low risk' women who plan birth in a non-obstetric unit setting have lower intervention rates than comparable women who plan their birth in an obstetric unit
- ~~Older women having a first baby appear to benefit less than younger women from planned birth in a non-obstetric unit setting.~~
- The chances of experiencing an intervention or outcome that requires obstetric care increase with age, even in women who do not have known risk factors.
- Younger nulliparous women appear to benefit more than older nulliparous women from the reduction in interventions associated with planned birth in a non-obstetric unit setting
- ~~Increased intervention rates at older ages may partly reflect women's expectations and preferences and possibly 'higher risk' labelling by clinicians.~~

### Strengths and weaknesses

#### Strengths

- The study was based on a large, nationally representative cohort of 'low risk' women, with high quality data collected prospectively.

#### Weaknesses

- The number of women over 40 was relatively small so the study had limited power to explore effects in women over 40, particularly in non-obstetric unit settings.
- Planned births in non-obstetric unit settings were combined; graphical plots indicated that this was reasonable but important differences between settings cannot be ruled out.

## Background

The proportion of births in women aged 35 and over has been steadily rising in recent years in the UK and elsewhere.[1, 2] Currently approximately 16% of births in England and Wales are to women aged 35-39 and 4% of births are to women aged 40 and over.[1]

Advanced maternal age is associated with an increased risk of pregnancy complications including gestational diabetes,[3] pregnancy induced hypertension and preeclampsia,[4, 5] twin or higher order pregnancies,[3] breech presentation,[6] placenta praevia,[3, 7-9] preterm birth,[5, 10] post-term birth,[11], severe maternal morbidity,[12] and adverse perinatal outcomes including antepartum stillbirth,[13] intrapartum-related perinatal death,[14] early neonatal death[15] and neonatal unit admission.[5] Older women also have an increased risk of interventions such as induction and caesarean section.[16-20] However, many age-related pregnancy complications are known risk factors for intrapartum complications or adverse perinatal outcomes and women with these risk factors would normally be advised to give birth in an obstetric unit (OU). Relatively little is known about the incidence of intrapartum interventions and adverse maternal and perinatal outcomes in older women who do not have known risk factors.[21]

The current clinical guideline in England[22] recommends that healthy women with straightforward pregnancies should be offered a choice of planned birth at home, in a midwife-led unit or in an obstetric unit, but also suggest individual assessment when planning place of birth for women over 40 at booking.[22] The evidence for 'low risk' women in general shows that planned birth in a non-OU setting is associated with a lower incidence of intrapartum interventions[22-28] and research has demonstrated that in 'low risk' women, after adjustment for maternal characteristics, planned birth in a midwifery unit and planned birth at home (multiparous women only) is not associated with an increased risk to the baby compared with planned birth in an OU.[25] However, rates of intrapartum transfer increase with age in nulliparous women[29] and, more generally, the risks that might affect the choice of planned place of birth (PPOB) by healthy older women are not well documented.

The aim of this study was to evaluate the association between maternal age and intrapartum interventions and adverse maternal and perinatal outcomes that may influence the choice of planned place of birth, in 'low risk' women with singleton, term pregnancies planning a vaginal birth.

The main objectives were to describe the relationship between maternal age and intrapartum interventions and adverse outcomes that indicate a need for obstetric or neonatal care in 'low risk' women; and to evaluate whether the relationship between maternal age and intrapartum interventions and adverse outcomes differs by planned place of birth.

## Methods

### Settings and participants

The study used data from the Birthplace in England national prospective cohort study which was designed to compare perinatal and maternal outcomes and interventions by planned place of birth at the start of care in labour.

The cohort study methods are described in full elsewhere.[25, 26] Briefly, the Birthplace cohort included a total of 79,774 births between April 2008 and April 2010, including 32,257 planned OU births from a stratified random sample of 36 OUs, 11,666 planned births in 53 freestanding midwifery units (FMUs), 17,582 planned births in 43 alongside midwifery units (AMUs) and 18,269 planned home births from 142 NHS trusts across England. Births were eligible for inclusion if the woman was planning a vaginal birth and received some labour care from an NHS midwife in her planned birth setting. Women who had an elective caesarean section or caesarean section before the onset of labour, presented in preterm labour (<37 weeks' gestation), had a multiple pregnancy, an unplanned home birth, or who were "unbooked" (received no antenatal care) were excluded. Stillbirths occurring before the start of care in labour were excluded. Women in the cohort were classified as 'low risk' if before the start of labour they were not known to have any of the medical or obstetric risk factors listed in national guidelines on intrapartum care[22] as "indicating increased risk suggesting planned birth in an obstetric unit". The study had a high response rate and low levels of missing data.[25, 26]

The study population for the analyses reported here was 'low risk' women in the Birthplace cohort aged 16 years or over at the time of birth, with a term (gestational age 37<sup>+0</sup> weeks to 42<sup>+0</sup> weeks inclusive) pregnancy and parity less than 6. In the NICE intrapartum care guideline individual assessment is recommended when planning place of birth for women with parity of 6 or more and many midwifery units restrict admission to women of parity 5 or less.[30] We additionally excluded women for whom age, parity or gestational age was not known.

Research ethics committee approval for the Birthplace study was obtained from the Berkshire Research Ethics Committee and did not require consent to be sought from participants as no personally identifiable data were collected.

### Data

As described elsewhere,[25] maternal characteristics, and medical or obstetric risk factors known prior to the onset of labour were extracted from the woman's medical records by the midwife

1 attending the birth. Complicating conditions identified by the midwife at the start of care in labour  
2 (for example prolonged rupture of membranes), intrapartum interventions and adverse maternal  
3 and perinatal outcomes were recorded by the attending midwife using a data collection form started  
4 during labour and completed on or after the fifth postnatal day.  
5  
6

7  
8 Planned place of birth (OU, AMU, FMU or home) was based on the intended place of birth at the  
9 start of care in labour. Women were included in the group in which they planned to give birth at the  
10 start of care in labour regardless of whether they were transferred during labour care or  
11 immediately after the birth.  
12  
13

## 14 **Outcomes**

15  
16 We focused on outcome measures that reflected interventions and adverse outcomes that indicated  
17 a need for obstetric and/or neonatal care, that is, outcomes that would require the woman and/or  
18 baby to be transferred to an obstetric or neonatal unit if labour care or birth took place elsewhere.  
19 For women, we considered the following outcomes both separately and as a combined maternal  
20 composite outcome ('interventions/adverse outcomes requiring obstetric care'): augmentation with  
21 syntocinon, instrumental delivery (ventouse or forceps), intrapartum caesarean section, general  
22 anaesthesia, maternal blood transfusion, 3<sup>rd</sup>/4<sup>th</sup> degree perineal tear, maternal admission for higher  
23 level care. The use of epidural/spinal analgesia was also considered as a secondary outcome. The  
24 main outcomes considered for women were the maternal composite outcome ('interventions and  
25 adverse outcomes requiring obstetric care'), augmentation, instrumental delivery, and intrapartum  
26 caesarean section.  
27  
28

29 For babies, we considered a single composite outcome measure largely reflecting admission to a  
30 neonatal unit. This 'perinatal composite outcome' encompassed one or more of the following  
31 events: admission to a neonatal unit within 48 hours of birth, stillbirth after the onset of labour or  
32 early neonatal death.  
33  
34

## 35 **Statistical analysis**

36  
37 Analyses were conducted separately by parity. We modelled age at the time of delivery both as a  
38 categorical and continuous variable, using log Poisson regression to estimate relative risks adjusted  
39 for the following potential confounders: ethnic group, understanding of English, marital or partner  
40 status, body mass index (BMI), index of multiple deprivation (IMD) score, gestational age at birth  
41 and, where appropriate, planned place of birth (see supplementary Table S1 for categorisation). We  
42 also carried out sensitivity analyses in which we additionally adjusted for the presence of  
43  
44  
45  
46  
47  
48  
49  
50  
51  
52  
53  
54  
55  
56  
57  
58  
59  
60

1 complicating conditions identified at the start of care in labour (none, one or more) and for the use  
2 of epidural/spinal analgesia.  
3

4 We fitted a series of models following a pre-specified, iterative strategy. In order to test our  
5 modelling assumptions regarding age and to determine whether it was appropriate to combine data  
6 for planned births in non-OU settings, we plotted outcomes by age and planned place of birth using  
7 polynomial smoothing.[31] Visual inspection of these plots (see Figure 1 and 2 for the main  
8 outcomes) indicated that it was reasonable to model age as a continuous variable within the age  
9 range 16-40 (inclusive) and further indicated that event rates were generally similar in the three  
10 non-OU settings, suggesting that it was reasonable to combine the non-OU settings for the purposes  
11 of exploring interactions between maternal age and planned place of birth. We did not model age as  
12 a continuous variable above the age of 40 because data were sparse, particularly for planned non-  
13 OU births to nulliparous women, and we could not be confident that the broadly linear trends seen  
14 at younger ages could be extrapolated above this age.  
15  
16  
17  
18  
19  
20  
21  
22

23 We initially modelled the effect of age on study outcomes separately by parity and for all planned  
24 places of birth combined. Models in which age was modelled as a continuous variable were  
25 restricted to the age range 16-40 inclusive. For each of the study outcomes, we tested for an  
26 interaction between age (as a continuous variable) and planned place of birth (OU vs. non-OU) using  
27 a Wald test, and where the interaction was significant at the 5% level, we modelled the effect of age  
28 on the outcome separately by planned place of birth. For outcomes where the interaction between  
29 age and planned place of birth was significant, we calculated crude and adjusted relative risks  
30 associated with planned non-OU birth separately for each age band.  
31  
32  
33  
34  
35  
36

37 In order to test whether the presence of complicating conditions at the start of care in labour (for  
38 example prolonged rupture of membranes) had an effect on the observed relationships, we fitted a  
39 further set of models in which we adjusted for both maternal characteristics and the presence of  
40 complicating conditions. Because previous analyses have shown that women planning birth in an OU  
41 have a higher prevalence of complicating conditions than in other settings[25] and this affects the  
42 magnitude of the difference in event rates between settings, we carried out further analyses of the  
43 main outcomes restricted to 'low risk' women without complicating conditions at the start of care in  
44 labour.  
45  
46  
47  
48  
49  
50

51 Robust variance estimation was used to allow for the clustered nature of the data and, as described  
52 elsewhere,[25, 26] probability weights were incorporated to account for differences in the  
53 probability of a woman being selected for inclusion in the study arising from differences in each  
54 unit/trust's period of participation and the stratum specific probabilities of selection of OUs. The  
55  
56  
57  
58  
59  
60

1  
2  
3  
4  
5  
6  
7  
8  
9  
10  
11  
12  
13  
14  
15  
16  
17  
18  
19  
20  
21  
22  
23  
24  
25  
26  
27  
28  
29  
30  
31  
32  
33  
34  
35  
36  
37  
38  
39  
40  
41  
42  
43  
44  
45  
46  
47  
48  
49  
50  
51  
52  
53  
54  
55  
56  
57  
58  
59  
60

weighting is such that, when applied to the pooled data for all four settings, the weighted event rates represent the estimated average event rates for England as a whole.

For each outcome, we calculated the number of events, the number of births, the weighted incidence and 95% confidence intervals. We assessed statistical significance at the 5% level.

For peer review only



## Results

### Description of the study sample

From the 79,774 women in the Birthplace cohort we excluded 15,553 women who had pre-existing risk factors including 'NICE' medical and obstetric risk factors,[22] grand multiparity (parity 6 or over) and post-term pregnancy, 62 women who were aged under 16, 682 women who had missing data on risk factors, parity or gestational age, and 106 whose age was missing. The study population consisted of 63,371 eligible 'low risk' women. The proportion (weighted) of women who were ineligible because of pre-existing risk factors, increased from 31.9% in women aged 16-19 to 46.7% in women aged 40 and over.

Table 1 describes the characteristics of the sample by age. The percentages shown in the table are weighted so that they provide an estimate of the distribution of maternal characteristics that would apply to eligible 'low risk' births in England. Older women tended to be white, have a fluent understanding of English, and were more likely than younger women to live in a socioeconomically advantaged area. They were less likely than younger women to be nulliparous and more likely to have had multiple previous pregnancies. Planned home births were more common at older ages (Table 1 and supplementary Tables S2 and S3), particularly in multiparous women (supplementary Table S3). Older women were more likely to have complicating conditions, such as prolonged rupture of membranes, noted by the midwife at the start of care in labour (Table 1). Complicating conditions at start of care in labour were more common in nulliparous women (supplementary Tables S2 and S3).

[TABLE 1 HERE]

### Maternal interventions and adverse outcomes

Descriptive plots of outcomes by age indicated that the incidence of most outcomes tended to increase steadily with age in the age range 16 to 40, and that incidence rates were generally lower in planned non-OU births (Figure 1 and supplementary Figure S1). Rates for planned OU and non-OU births tended to diverge above this age range, but rates were based on small numbers of older women (supplementary Table S4) particularly for planned AMU and FMU births and therefore these rates have wide confidence intervals.

For nulliparous women in the age range 16-40 (all PPOBs combined), the adjusted risk of having an intervention/ adverse outcome requiring obstetric care (maternal composite) increased significantly with age, as did the risk of augmentation with syntocinon, instrumental delivery, intrapartum

1 caesarean section, 3<sup>rd</sup>/4<sup>th</sup> degree perineal tear, or maternal admission for higher level care (Table 2).  
2 For augmentation with syntocinon and the maternal composite outcome, the effect of age differed  
3 by PPOB (Table 2). The risk of augmentation increased more steeply with age in non-OU settings (RR  
4 1.23, 95% CI 1.18-1.28 for every 5-year increase in age in planned non-OU births vs. 1.12, 95% CI  
5 1.07-1.17 for planned OU births). Nevertheless, the proportion of women receiving augmentation  
6 was lower in planned non-OU births at all ages (Table 3). For example, 42.2% (95% CI 36.4%-48.1%)  
7 of nulliparous women aged 35-39 who planned birth in an OU received augmentation with  
8 syntocinon compared with 22.6% (95% CI 19.8%-25.7%) of nulliparous women of the same age who  
9 planned birth in a non-OU setting. A similar pattern was observed for the maternal composite  
10 outcome: the risk of an intervention/adverse outcome requiring obstetric care (maternal composite)  
11 increased slightly more steeply with age in the non-OU settings (RR 1.21, 95% CI 1.18-1.25 for every  
12 5-year increase in age in planned non-OU births vs. 1.12, 95% CI 1.10-1.15 for planned OU births) but  
13 the absolute risk was lower in the planned non-OU birth at all ages (Table 3). For example, 65.5%  
14 (95% CI 61.8%-69.1%) of nulliparous women aged 35-39 who planned birth in an OU experienced an  
15 intervention/adverse outcome requiring obstetric care compared with 39.9% (95% CI 36.0%-43.9%)  
16 of nulliparous women of the same age who planned birth in a non-OU setting. In nulliparous women,  
17 the risk of instrumental delivery and intrapartum caesarean section increased significantly with age  
18 (RR 1.18, 95% CI 1.12-1.25 and RR 1.27, 95% CI 1.23-1.32) across all settings. Again, absolute risks  
19 were substantially lower in planned non-OU births (Table 3).  
20  
21  
22  
23  
24  
25  
26  
27  
28  
29  
30  
31

32 [TABLE 2 AND TABLE 3 HERE]  
33  
34

35 Similar patterns were observed when we adjusted for complicating conditions at the start of care in  
36 labour in order to take account of difference between settings in complicating conditions at the start  
37 of care in labour (23.9% in nulliparous planned OU births vs. 8.6% in nulliparous planned-non-OU  
38 births) (supplementary Table S5).  
39  
40  
41

42 However, although the risk of intervention increased with age, at all ages, nulliparous women who  
43 planned birth in a non-OU setting had a significantly reduced risk of receiving augmentation or of  
44 experiencing an intervention/adverse outcome requiring obstetric care. Table 4 shows the adjusted  
45 risks by age for the two outcomes (maternal composite and augmentation) where the effect of  
46 planned place of birth differed by age.  
47  
48  
49  
50

51 [TABLE 4 HERE]  
52  
53

54 For multiparous women aged 16-40 (all PPOBs combined), the combined risk of having an  
55 intervention or adverse outcome requiring obstetric care (maternal composite) or of instrumental  
56 delivery, intrapartum caesarean section, and maternal admission for higher level care increased with  
57  
58  
59  
60

1 age (Table 2). Augmentation with syntocinon, general anaesthesia, blood transfusion, and 3<sup>rd</sup>/4<sup>th</sup>  
2 degree perineal tear were not associated with maternal age in multiparous women (Table 2). For all  
3 of the outcomes considered, the effect of age did not differ by PPOB in multiparous women (Table  
4 2). Again, for the maternal composite outcome, augmentation with syntocinon, instrumental  
5 delivery, intrapartum caesarean section, the absolute event rates were lower in planned non-OU  
6 births in most age categories (Table 5). For example, 9.8% (95% CI 8.2%-11.6%) of multiparous  
7 women aged 35-39 who planned birth in an OU received augmentation with syntocinon compared  
8 with 1.8% (95% CI 1.3%-2.5%) of women of the same age who planned birth in a non-OU setting.  
9

10  
11  
12  
13  
14 Up to age 40, other less common outcomes did not increase significantly with maternal age in  
15 nulliparous or multiparous women with the exception of maternal admission to higher level care  
16 (Table 2 and supplementary Tables S6 and S7).  
17  
18

19  
20 [TABLE 5 HERE]  
21  
22

23 Absolute event rates for the main outcomes (maternal composite, augmentation with syntocinon,  
24 instrumental delivery, intrapartum caesarean section and perinatal composite) were reduced when  
25 the analysis was restricted to women without complicating conditions identified at start of labour  
26 care (supplementary Tables S8 and S9). However, at all ages, nulliparous women without  
27 complicating conditions who planned birth in a non-OU setting had a significantly reduced risk of  
28 experiencing an intervention/adverse outcome requiring obstetric care (maternal composite  
29 outcome) (Table S8 and S10). For example, 38.0% (95% CI 34.3%-41.9%) of nulliparous women aged  
30 35-39 without complicating complications who planned birth in a non-OU setting experienced an  
31 intervention/adverse outcome requiring obstetric care, compared with 57.7% (95% CI 53.4%- 62.0%)  
32 of women of the same age without complicating conditions who planned birth in an OU.  
33  
34  
35  
36  
37  
38  
39

40 The use of epidural/spinal analgesia increased significantly with maternal age and lower rates of use  
41 were observed in planned non-OU births (supplementary Figure S2). Adjustment for use of epidural  
42 in the multivariable models attenuated but did not change the results materially (data not shown).  
43  
44  
45

#### 46 **Perinatal outcome**

47

48 The perinatal composite outcome (admission to a neonatal unit within 48 hours of birth, stillbirth  
49 after the onset of labour or early neonatal death) showed a modest but not statistically significant  
50 increase with age in nulliparous women in the age range 16-40 (Table 2). The risk increased  
51 significantly in nulliparous women aged 40+ compared with women aged 25-29 (RR 2.29, 95%CI  
52 1.28-4.09, adjusted for maternal characteristics and planned place of birth, all settings combined).  
53  
54  
55  
56  
57  
58  
59  
60

1  
2  
3  
4  
5  
6  
7  
8  
9  
10  
11  
12  
13  
14  
15  
16  
17  
18  
19  
20  
21  
22  
23  
24  
25  
26  
27  
28  
29  
30  
31  
32  
33  
34  
35  
36  
37  
38  
39  
40  
41  
42  
43  
44  
45  
46  
47  
48  
49  
50  
51  
52  
53  
54  
55  
56  
57  
58  
59  
60

multiparous women in the age range 16-40 (Table 2) and the risk was not significantly increased in births to multiparous women aged 40+ compared with women aged 25-29 (RR 1.21, 95% CI 0.60-2.43, adjustment as before). Absolute event rates are shown in Table 6.

[TABLE 6 HERE]

For peer review only

## Discussion

### Principal findings

In women without known medical or obstetric risk factors prior to the onset of labour, interventions and adverse maternal outcomes requiring obstetric care generally increased with age, but there was no age at which there was a step-change in risk. For both nulliparous and multiparous women, maternal intervention rates were lower in births planned in non-OU settings compared with planned OU births at all ages. For nulliparous women the overall risk of experiencing an intervention or adverse outcome requiring obstetric care, and in particular of augmentation with syntocinon, increased more steeply with age in planned non-OU births than in planned OU births. As a consequence, although nulliparous women of all ages who planned birth in a non-OU setting had a significantly reduced risk of experiencing an intervention or adverse outcome requiring obstetric care, the benefit of planned non-OU birth was greatest at younger ages.

In low risk women up to the age of 40, the risk of neonatal unit admission or intrapartum stillbirth/early neonatal death did not show a statistically significant upward trend with age in either nulliparous or multiparous women. In planned OU births, the risk of neonatal unit admission or perinatal death was significantly higher in nulliparous women aged 40+ relative to women aged 25-29.

### Strengths and limitations

A strength of the study is that we were able to evaluate the effect of age on intrapartum outcomes by planned birth setting in a nationally representative sample of 'low risk' women. In order to strengthen the evidence supporting clinical guidelines on planned place of birth, the study specifically focused on outcomes that reflect need for obstetric or neonatal care in a sample of women who meet the current criteria for planned birth in a non-OU setting.[22] To our knowledge, this is the first study to investigate the effect of increasing maternal age in different birth settings with a focus on outcomes that would require transfer to an OU and hence may affect the choice of planned place of birth.

Despite the large overall sample size, the number of older women was relatively small, so we had limited ability to explore effects above age 40 or to separate results of individual non-OU birth settings. We combined data for the non-OU settings, having first explored the data to check that this was reasonable. This increased our statistical power to evaluate the association between maternal age and the study outcomes (maternal and perinatal), but we still lacked the statistical power to evaluate uncommon outcomes. It is important to note that previous analyses[25] have shown that

1 planned home births are associated with a significantly increased risk of adverse perinatal outcomes  
2 in nulliparous women.  
3

4  
5 The risk of bias due to missing data and non-response was low: the study had a low level of missing  
6 data, a high response rate[25, 26] and, because consent was not required, there was no self-  
7 selection bias due to non-consent. We addressed potential differences in risk between groups in a  
8 number of ways. First, we controlled for important potential confounders such as body mass index.  
9  
10 Second, we focused on a relatively homogeneous population of women without known medical or  
11 obstetric risk factors prior to the onset of labour. Third, because previous analyses[25] identified  
12 that the prevalence of complicating conditions at the start of care in labour was higher in the  
13 planned OU birth group, we conducted two additional analyses in which we controlled for  
14 complicating conditions and restricted the analysis to women without complicating conditions.  
15  
16 Differences in the clinical characteristics of the OU and non-OU groups therefore seem unlikely to  
17 explain the age related trends observed or the significant reductions in risks observed in non-OU  
18 births. Nevertheless, women self-select their birth setting and it may be that some of the differences  
19 in outcomes that we observed between settings may have been due to unmeasured differences in  
20 the characteristics of women opting for OU and non-OU births, rather than to differences  
21 attributable to the birth setting.  
22  
23  
24  
25  
26  
27  
28

### 29 **Comparison with the existing literature**

30  
31  
32  
33 Older women have been shown to have an increased risk of intrapartum intervention,[6, 32] but  
34 many studies include women known to be at higher risk who would normally be advised to give birth  
35 in an obstetric unit. Evidence relating to 'low risk' women[17] or from studies that have controlled  
36 for pre-existing risk factors or complications[33] is more limited but is generally consistent with our  
37 finding that intervention rates increase with age in 'low risk' women.  
38  
39

40  
41  
42 There is extensive evidence that 'low risk' women who plan birth in a non-OU setting have a reduced  
43 risk of a range of intrapartum interventions, including augmentation, instrumental delivery and  
44 intrapartum caesarean section, and are more likely to have a spontaneous vaginal birth.[22-24, 27,  
45 28] Our study found that, ~~across the age range 16-40~~at all ages, women who plan birth in a non-OU  
46 setting experience substantially lower intervention rates and are less likely to experience an  
47 outcome requiring obstetric care than women of the same age who plan birth in an obstetric unit.  
48  
49

50  
51  
52 In nulliparous women we found that rates of augmentation of labour with syntocinon increased  
53 more steeply with maternal age in planned non-OU births compared with planned OU births,  
54 although absolute rates of augmentation were substantially lower in planned non-OU births at all  
55 ages. An age-related increase in augmentation is consistent with evidence of poorer uterine function  
56  
57  
58  
59  
60

1 at older ages,[34] longer labours[34] and an increased incidence of prolonged labour,[35, 36] but the  
2 reasons for a steeper increase in augmentation with age in non-OU settings is unclear. It has been  
3 suggested that labelling of older women as 'higher risk' and/or heightened concern about the safety  
4 of older nulliparous women, particularly those who have required fertility treatment, may result in  
5 increased rates of caesarean section for non-medical reasons,[20, 32, 33, 37] and it is possible that  
6 similar factors affect midwives' decision making regarding transfer for failure to progress, or for  
7 other reasons. Intrapartum transfers from midwifery units in the Birthplace study have been shown  
8 to increase significantly with age in nulliparous women[29] and, once transferred, women are  
9 'exposed' to the higher intervention rates found in obstetric units.

16 It is also possible that age-related differences in women's expectations and expressed preferences  
17 may contribute to the pattern of intervention observed in our study. Older nulliparous women have  
18 been found to have a more positive attitude towards caesarean section,[38] for example, and also to  
19 have a higher perception of pregnancy risk, even in older women without known risk factors.[39]  
20 The significant positive association between maternal age and epidural use observed in our study  
21 (seen most strongly in nulliparous women planning a non-OU birth), would be consistent with a  
22 greater willingness of older women to consider interventions.

28 We found a significantly increased risk of maternal admission to higher level care at older ages in  
29 both nulliparous and multiparous women. The number of events was small and this could be a  
30 chance finding but an increase in serious obstetric complications at older ages observed in some  
31 studies[3, 6, 12] cannot be ruled out.

36 Although studies including women with known risk factors have reported increased risks in women  
37 aged over 35,[3, 6, 35] our analysis shows that up to the age of 40, risks tend to increase in a broadly  
38 linear manner in healthy women with straightforward pregnancies, with no evidence of a step-  
39 change in risk below the age of 40. Other studies have similarly concluded that the association of  
40 adverse outcomes with maternal age is a continuum,[3] with the increase in adverse perinatal  
41 outcomes possibly gaining momentum above the age of 40.[40] Because of the small number of  
42 births to mothers aged over 40 in our sample we had limited power to evaluate risks at older ages  
43 and other evidence relating to older 'low risk' women is sparse.[21]

50 There is some evidence that the babies of older women are at increased risk of serious adverse  
51 outcomes, including intrapartum-related perinatal death,[14] early neonatal death[15] and neonatal  
52 unit admission,[5, 33] but these outcomes would be expected to be substantially reduced in 'low  
53 risk' women who, by definition, do not have medical or obstetric risk factors such as severe obesity,  
54 diabetes or previous caesarean section. Furthermore, the poorer outcomes associated with the  
55

1 increased risk of pre-term birth at older ages do not apply to women giving birth at term. In our 'low  
2 risk' cohort, we did not observe a significant increase with age in our composite measure of neonatal  
3 unit admission/perinatal death within the age range 16-40, but graphical plots for nulliparous  
4 women suggested a possible upturn in neonatal unit admission/perinatal death around the age of 40  
5 in nulliparous women. Further research evaluating perinatal outcomes in 'low risk' women aged over  
6 40 is needed.  
7  
8  
9

### 10 **Conclusions and policy implications**

11  
12  
13  
14 The incidence of intrapartum interventions and adverse outcomes requiring obstetric care increases  
15 with maternal age, but at all ages 'low risk' women who plan birth in a non-obstetric unit setting  
16 tend to experience lower intervention rates than comparable women who plan birth in an OU.  
17 Amongst nulliparous women, younger women appear to benefit more from the reduction in  
18 interventions associated with planned birth in a non-OU setting. Increased intervention rates at  
19 older ages may partly reflect women's expectations and preferences and possibly 'higher risk'  
20 labelling by clinicians.  
21  
22  
23  
24  
25

26 All women, irrespective of age and parity, should be given information about the risks and benefits  
27 of different birth settings. Nulliparous women planning birth in non-OU setting should be informed  
28 that the risk of interventions that require transfer to an OU increases with age. Further research is  
29 required to evaluate adverse perinatal outcomes in 'low risk' women aged over 40.  
30  
31  
32  
33  
34  
35  
36  
37  
38  
39  
40  
41  
42  
43  
44  
45  
46  
47  
48  
49  
50  
51  
52  
53  
54  
55  
56  
57  
58  
59  
60



## Acknowledgements

We thank Xiaosi Wang for conducting initial literature searches and statistical analysis.

## Competing interests

None.

## Contribution to authorship

JH conceived and developed the study outline with input from PB; YL developed the protocol and analysis plan with input from JH, JT and MK; YL conducted the analysis; JT provided statistical advice; YL and JH drafted the manuscript with input from RR, MK and PB. All authors were involved in interpretation of data, review and revision of the draft manuscript and approval of the final version.

## Ethics Approval

Research ethics committee approval for the Birthplace study was obtained from the Berkshire Research Ethics Committee (MREC ref 07/H0505/151).

## Funding

This paper reports on an independent study which is funded by the Policy Research Programme in the Department of Health. The views expressed are not necessarily those of the Department.

Birthplace combines the Evaluation of Maternity Units in England study funded in 2006 by the National Institute for Health Research Service Delivery and Organisation (NIHR SDO) programme, and the Birth at Home in England study funded in 2007 by the Department of Health Policy Research Programme (DH PRP). From January 2012, the NIHR SDO programme merged with the NIHR Health Services Research programme to establish the new NIHR health Services and Delivery Research (NIHR HS&DR) programme. The views and opinions expressed by the authors do not necessarily reflect those of the HS&DR Programme, NIHR, NHS, DH PRP or the Department of Health.

## References

1. Office for National Statistics. Live Births in England and Wales by Characteristics of Mother 1, 2011. November 2013. Available from: [http://www.ons.gov.uk/ons/dcp171778\\_296157.pdf](http://www.ons.gov.uk/ons/dcp171778_296157.pdf).
2. Martin JA, Hamilton BE, Ventura SJ, et al. Births: final data for 2009. *Natl Vital Stat Rep*. 2011;**60**(1):1-70. doi:
3. Biro MA, Davey M-A, Carolan M, et al. Advanced maternal age and obstetric morbidity for women giving birth in Victoria, Australia: A population-based study. *Aust N Z J Obstet Gynaecol*. 2012;**52**(3):229-34. doi: 10.1111/j.1479-828X.2012.01427.x
4. Carolan M. Maternal age  $\geq 45$  years and maternal and perinatal outcomes: A review of the evidence. *Midwifery*. 2013;**29**(5):479-89. doi: 10.1016/j.midw.2012.04.001
5. Delbaere I, Verstraelen H, Goetgeluk S, et al. Pregnancy outcome in primiparae of advanced maternal age. *European Journal of Obstetrics & Gynecology and Reproductive Biology*. 2007;**135**(1):41-6. doi: 10.1016/j.ejogrb.2006.10.030
6. Jolly M, Sebire N, Harris J, et al. The risks associated with pregnancy in women aged 35 years or older. *Hum Reprod*. 2000;**15**(11):2433-7. doi: 10.1093/humrep/15.11.2433
7. Ananth CV, Demissie K, Smulian JC, et al. Placenta previa in singleton and twin births in the United States, 1989 through 1998: A comparison of risk factor profiles and associated conditions. *Am J Obstet Gynecol*. 2003;**188**(1):275-81. doi: 10.1067/mob.2003.10
8. Ananth CV, Wilcox AJ, Savitz DA, et al. Effect of maternal age and parity on the risk of uteroplacental bleeding disorders in pregnancy. *Obstet Gynecol*. 1996;**88**(4, Part 1):511-6. doi: 10.1016/0029-7844(96)00236-0
9. Faiz AS, Ananth CV. Etiology and risk factors for placenta previa: an overview and meta-analysis of observational studies. *Journal of Maternal-Fetal and Neonatal Medicine*. 2003;**13**(3):175-90. doi: 10.1080/jmf.13.3.175.190
10. Jacobsson B, Ladfors L, Milsom I. Advanced Maternal Age and Adverse Perinatal Outcome. *Obstet Gynecol*. 2004;**104**(4):727-33. doi: 10.1097/01.AOG.0000140682.63746.be. doi: 10.1097/01.AOG.0000140682.63746.be

- 1 11. Roos N, Sahlin L, Ekman-Ordeberg G, et al. Maternal risk factors for postterm pregnancy and  
2 cesarean delivery following labor induction. *Acta Obstet Gynecol Scand*. 2010;**89**(8):1003-10. doi:  
3 10.3109/00016349.2010.500009
- 4  
5  
6 12. Knight M, Kurinczuk JJ, Spark P, et al. Inequalities in maternal health: national cohort study  
7 of ethnic variation in severe maternal morbidities. *BMJ*. 2009;**338**:b542. doi: 10.1136/bmj.b542
- 8  
9  
10 13. Huang L, Sauve R, Birkett N, et al. Maternal age and risk of stillbirth: a systematic review.  
11 *Can Med Assoc J*. 2008;**178**(2):165-72. doi: 10.1503/cmaj.070150
- 12  
13  
14 14. Pasupathy D, Wood AM, Pell JP, et al. Advanced maternal age and the risk of perinatal death  
15 due to intrapartum anoxia at term. *J Epidemiol Community Health*. 2011;**65**(3):241-5. doi:  
16 10.1136/jech.2009.097170
- 17  
18  
19 15. Gilbert WM, Nesbitt TS, Danielsen B. Childbearing Beyond Age 40: Pregnancy Outcome in  
20 24,032 Cases. *Obstet Gynecol*. 1999;**93**(1):9-14. doi:  
21
- 22 16. Ezra Y, McParland P, Farine D. High delivery intervention rates in nulliparous women over  
23 age 35. *European Journal of Obstetrics & Gynecology and Reproductive Biology*. 1995;**62**(2):203-7.  
24 doi: [http://dx.doi.org/10.1016/0301-2115\(95\)02201-H](http://dx.doi.org/10.1016/0301-2115(95)02201-H)
- 25  
26  
27 17. Gordon D, Milberg J, Daling J, et al. Advanced Maternal Age As a Risk Factor for Cesarean  
28 Delivery. *Obstet Gynecol*. 1991;**77**(4):493-7. doi:  
29
- 30 18. Heffner LJ, Elkin E, Fretts RC. Impact of labor induction, gestational age, and maternal age on  
31 cesarean delivery rates. *Obstet Gynecol*. 2003;**102**(2):287-93. doi: 10.1016/S0029-7844(03)00531-3
- 32  
33  
34 19. Patel RR, Peters TJ, Murphy DJ, et al. Prenatal risk factors for Caesarean section. Analyses of  
35 the ALSPAC cohort of 12 944 women in England. *Int J Epidemiol*. 2005;**34**(2):353-67. doi:  
36 10.1093/ije/dyh401
- 37  
38  
39 20. Peipert JF, Bracken MB. Maternal Age: An Independent Risk Factor for Cesarean Delivery.  
40 *Obstet Gynecol*. 1993;**81**(2):200-5. doi:  
41
- 42 21. Carolan M. The Graying of the Obstetric Population: Implications for the Older Mother. *J*  
43 *Obstet Gynecol Neonatal Nurs*. 2003;**32**(1):19-27. doi: 10.1177/0884217502239797
- 44  
45  
46 22. National Collaborating Centre for Women's and Children's Health. Intrapartum care of  
47 healthy women and their babies during childbirth. Commissioned by the National Institute for Health  
48 and Clinical Excellence (NICE). London: RCOG press; 2007.
- 49  
50  
51  
52  
53  
54  
55  
56  
57  
58  
59  
60

- 1 23. Hodnett ED, Downe S, Walsh D. Alternative versus conventional institutional settings for  
2 birth. *The Cochrane database of systematic reviews*. 2012;**8**:CD000012. doi:  
3 10.1002/14651858.CD000012.pub4  
4  
5  
6 24. Walsh D, Downe SM. Outcomes of free-standing, midwife-led birth centers: a structured  
7 review. *Birth*. 2004;**31**(3):222-9. doi: 10.1111/j.0730-7659.2004.00309.x  
8  
9  
10 25. Birthplace in England Collaborative Group. Perinatal and maternal outcomes by planned  
11 place of birth for healthy women with low risk pregnancies: the Birthplace in England national  
12 prospective cohort study. *BMJ*. 2011;**343**:d7400. doi: 10.1136/bmj.d7400  
13  
14  
15 26. Hollowell J, Puddicombe D, Rowe R, et al. The Birthplace national prospective cohort study:  
16 perinatal and maternal outcomes by planned place of birth. Birthplace in England research  
17 programme. Final report part 4. NIHR Service Delivery and Organisation programme, 2011.  
18  
19  
20 27. Lindgren HE, Radestad IJ, Christensson K, et al. Outcome of planned home births compared  
21 to hospital births in Sweden between 1992 and 2004. A population-based register study. *Acta Obstet*  
22 *Gynecol Scand*. 2008;**87**(7):751-9. doi: 10.1080/00016340802199903  
23  
24  
25 28. Janssen PA, Saxell L, Page LA, et al. Outcomes of planned home birth with registered midwife  
26 versus planned hospital birth with midwife or physician. *CMAJ*. 2009;**181**(6-7):377-83. doi:  
27 10.1503/cmaj.081869  
28  
29  
30 29. Rowe RE, Fitzpatrick R, Hollowell J, et al. Transfers of women planning birth in midwifery  
31 units: data from the Birthplace prospective cohort study. *BJOG*. 2012;**119**(9):1081-90. doi:  
32 10.1111/j.1471-0528.2012.03414.x  
33  
34  
35 30. Redshaw M, Rowe R, Schroeder L, et al. Mapping maternity care. The configuration of  
36 maternity care in England. Birthplace in England research programme. Final report part 3. NIHR  
37 Service Delivery and Organisation programme;, 2011.  
38  
39  
40 31. Fan J, Gijbels I. Local Polynomial Modelling and Its Applications. London: Chapman & Hall;  
41 1996.  
42  
43  
44 32. Bayrampour H, Heaman M. Advanced Maternal Age and the Risk of Cesarean Birth: A  
45 Systematic Review. *Birth*. 2010;**37**(3):219-26. doi: 10.1111/j.1523-536X.2010.00409.x  
46  
47  
48  
49 33. Bell JS, Campbell DM, Graham WJ, et al. Can obstetric complications explain the high levels  
50 of obstetric interventions and maternity service use among older women? A retrospective analysis  
51 of routinely collected data. *BJOG*. 2001;**108**(9):910-8. doi: 10.1111/j.1471-0528.2001.00214.x  
52  
53  
54  
55  
56  
57  
58  
59  
60

- 1  
2  
3  
4  
5  
6  
7  
8  
9  
10  
11  
12  
13  
14  
15  
16  
17  
18  
19  
20  
21  
22  
23  
24  
25  
26  
27  
28  
29  
30  
31  
32  
33  
34  
35  
36  
37  
38  
39  
40  
41  
42  
43  
44  
45  
46  
47  
48  
49  
50  
51  
52  
53  
54  
55  
56  
57  
58  
59  
60
34. Main DM, Main EK, Moore li DH. The relationship between maternal age and uterine dysfunction: A continuous effect throughout reproductive life. *Am J Obstet Gynecol*. 2000;**182**(6):1312-20. doi: 10.1067/mob.2000.106249
35. Berkowitz GS, Skovron ML, Lapinski RH, et al. Delayed Childbearing and the Outcome of Pregnancy. *N Engl J Med*. 1990;**322**(10):659-64. doi: 10.1056/NEJM199003083221004
36. Greenberg MB, Cheng YW, Sullivan M, et al. Does length of labor vary by maternal age? *Am J Obstet Gynecol*. 2007;**197**(4):428.e1-.e7. doi: 10.1016/j.ajog.2007.06.058
37. Cnattingius R, Cnattingius S, Notzon FC. Obstacles to reducing cesarean rates in a low-cesarean setting: the effect of maternal age, height, and weight. *Obstet Gynecol*. 1998;**92**(4, Part 1):501-6. doi: 10.1016/s0029-7844(98)00244-0
38. Aasheim V, Waldenstrom U, Rasmussen S, et al. Experience of childbirth in first-time mothers of advanced age - a Norwegian population-based study. *BMC Pregnancy Childbirth*. 2013;**13**:53. doi: 10.1186/1471-2393-13-53
39. Bayrampour H, Heaman M, Duncan KA, et al. Comparison of Perception of Pregnancy Risk of Nulliparous Women of Advanced Maternal Age and Younger Age. *Journal of Midwifery & Women's Health*. 2012;**57**(5):445-53. doi: 10.1111/j.1542-2011.2012.00188.x
40. Carolan M, Frankowska D. Advanced maternal age and adverse perinatal outcome: A review of the evidence. *Midwifery*. 2011;**27**(6):793-801. doi: 10.1016/j.midw.2010.07.006

1  
2  
3  
4  
5  
6  
7  
8  
9  
10  
11  
12  
13  
14  
15  
16  
17  
18  
19  
20  
21  
22  
23  
24  
25  
26  
27  
28  
29  
30  
31  
32  
33  
34  
35  
36  
37  
38  
39  
40  
41  
42  
43  
44  
45  
46  
47  
48  
49  
50  
51  
52  
53  
54  
55  
56  
57  
58  
59  
60



(a) Maternal composite, nulliparous women



(e) Maternal composite, multiparous women



(b) Augmentation, nulliparous women



(f) Augmentation, multiparous women



(c) Instrumental delivery, nulliparous women



(g) Instrumental delivery, multiparous women

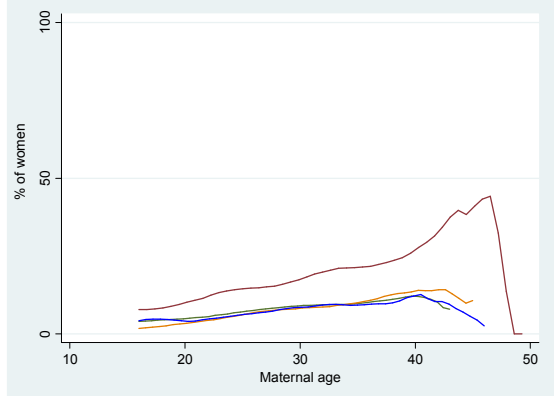

(d) Intrapartum caesarean section, nulliparous

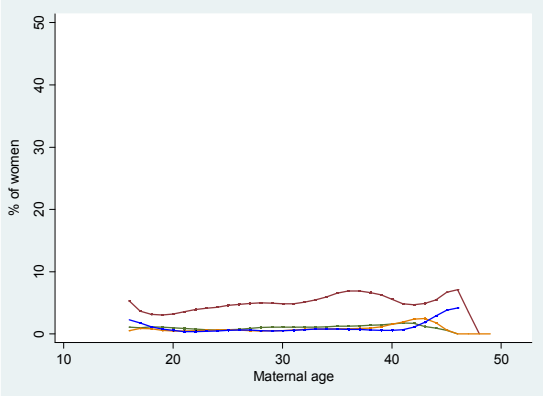

(h) Intrapartum caesarean section, multiparous



1 **Figure 1 Association between maternal age and intrapartum interventions and adverse maternal outcomes**  
2 **in low risk women aged 16 and over<sup>1</sup>**

3 <sup>1</sup> NOTE THAT scales for nulliparous women and multiparous women are different.  
4  
5  
6  
7  
8  
9  
10  
11  
12  
13  
14  
15  
16  
17  
18  
19  
20  
21  
22  
23  
24  
25  
26  
27  
28  
29  
30  
31  
32  
33  
34  
35  
36  
37  
38  
39  
40  
41  
42  
43  
44  
45  
46  
47  
48  
49  
50  
51  
52  
53  
54  
55  
56  
57  
58  
59  
60

For peer review only



(a) Perinatal composite, nulliparous women

(b) Perinatal composite, multiparous women



Figure 2 Association between maternal age and perinatal composite outcome in low risk women aged 16 and over

1  
2  
3  
4  
5  
6  
7  
8  
9  
10  
11  
12  
13  
14  
15  
16  
17  
18  
19  
20  
21  
22  
23  
24  
25  
26  
27  
28  
29  
30  
31  
32  
33  
34  
35  
36  
37  
38  
39  
40  
41  
42  
43  
44  
45  
46  
47  
48  
49  
50  
51  
52  
53  
54  
55  
56  
57  
58  
59  
60



**Table 1 Characteristics of low risk women aged 16 and over by maternal age category**

|                                            | 16 - 19 years<br>n=3354 |                | 20 - 24 years<br>n=11395 |                | 25 - 29 years<br>n=18091 |                | 30 - 34 years<br>n=18453 |                | 35 - 39 years<br>n=10397 |                | ≥ 40 years<br>n=1681 |                |
|--------------------------------------------|-------------------------|----------------|--------------------------|----------------|--------------------------|----------------|--------------------------|----------------|--------------------------|----------------|----------------------|----------------|
|                                            | n                       | % <sup>1</sup> | n                        | % <sup>1</sup> | n                        | % <sup>1</sup> | n                        | % <sup>1</sup> | n                        | % <sup>1</sup> | n                    | % <sup>1</sup> |
| <b>Ethnic group</b>                        |                         |                |                          |                |                          |                |                          |                |                          |                |                      |                |
| White                                      | 3078                    | 90.1           | 9685                     | 81.2           | 15146                    | 77.5           | 16052                    | 80.7           | 9339                     | 84.3           | 1527                 | 86.6           |
| Non-white                                  | 275                     | 9.9            | 1697                     | 18.8           | 2920                     | 22.5           | 2375                     | 19.3           | 1044                     | 15.8           | 153                  | 13.4           |
| Missing                                    | 1                       |                | 13                       |                | 25                       |                | 26                       |                | 14                       |                | 1                    |                |
| <b>Understanding of English</b>            |                         |                |                          |                |                          |                |                          |                |                          |                |                      |                |
| Fluent                                     | 3254                    | 96.7           | 10394                    | 89.6           | 16757                    | 90.0           | 17605                    | 92.9           | 10155                    | 96.3           | 1638                 | 96.7           |
| Not fluent                                 | 94                      | 3.3            | 948                      | 10.4           | 1251                     | 10.0           | 776                      | 7.1            | 214                      | 3.7            | 36                   | 3.4            |
| Missing                                    | 6                       |                | 53                       |                | 83                       |                | 72                       |                | 28                       |                | 7                    |                |
| <b>Marital/partner status</b>              |                         |                |                          |                |                          |                |                          |                |                          |                |                      |                |
| Married/living with partner                | 1836                    | 51.9           | 9550                     | 81.8           | 16868                    | 92.1           | 17782                    | 96.1           | 10004                    | 95.4           | 1591                 | 94.4           |
| Single/unsupported by partner              | 1440                    | 48.1           | 1677                     | 18.2           | 1010                     | 7.9            | 493                      | 3.9            | 293                      | 4.7            | 68                   | 5.7            |
| Missing                                    | 78                      |                | 168                      |                | 213                      |                | 178                      |                | 100                      |                | 22                   |                |
| <b>BMI in pregnancy (kg/m<sup>2</sup>)</b> |                         |                |                          |                |                          |                |                          |                |                          |                |                      |                |
| < 18.5                                     | 184                     | 6.2            | 426                      | 4.2            | 413                      | 2.6            | 337                      | 2.1            | 156                      | 1.5            | 18                   | 0.2            |
| 18.5 - 24.9                                | 1753                    | 50.3           | 5316                     | 45.6           | 8560                     | 45.9           | 9059                     | 46.7           | 4864                     | 44.5           | 802                  | 46.4           |
| 25.0 - 29.9                                | 598                     | 17.9           | 2558                     | 21.7           | 4341                     | 24.6           | 4206                     | 23.2           | 2572                     | 26.9           | 415                  | 27.6           |
| 30.0 - 35.0                                | 233                     | 7.6            | 1096                     | 10.0           | 1627                     | 9.3            | 1399                     | 8.8            | 769                      | 8.9            | 109                  | 8.1            |
| Not recorded                               | 581                     | 18.1           | 1969                     | 18.4           | 3091                     | 17.6           | 3389                     | 19.2           | 2000                     | 18.3           | 329                  | 17.7           |
| Missing                                    | 5                       |                | 30                       |                | 59                       |                | 63                       |                | 36                       |                | 8                    |                |
| <b>IMD quintile</b>                        |                         |                |                          |                |                          |                |                          |                |                          |                |                      |                |
| 1 <sup>st</sup> (Least deprived)           | 245                     | 6.8            | 1102                     | 8.5            | 2875                     | 13.8           | 4255                     | 20.5           | 2783                     | 24.6           | 434                  | 26.0           |
| 2 <sup>nd</sup>                            | 405                     | 12.3           | 1521                     | 13.3           | 3259                     | 17.5           | 4114                     | 21.7           | 2434                     | 22.3           | 396                  | 22.0           |
| 3 <sup>rd</sup>                            | 637                     | 18.2           | 2115                     | 18.0           | 3657                     | 18.6           | 3759                     | 19.7           | 2135                     | 20.0           | 357                  | 21.6           |
| 4 <sup>th</sup>                            | 827                     | 25.3           | 2784                     | 23.9           | 3957                     | 22.7           | 3479                     | 19.8           | 1765                     | 17.9           | 291                  | 16.9           |
| 5 <sup>th</sup> (Most deprived)            | 1221                    | 37.5           | 3821                     | 36.2           | 4262                     | 27.5           | 2759                     | 18.4           | 1215                     | 15.2           | 197                  | 13.7           |
| Missing                                    | 19                      |                | 52                       |                | 81                       |                | 87                       |                | 65                       |                | 6                    |                |
| <b>Previous pregnancies ≥ 24 weeks</b>     |                         |                |                          |                |                          |                |                          |                |                          |                |                      |                |
| 0                                          | 2835                    | 86.8           | 6341                     | 62.0           | 8438                     | 53.6           | 7307                     | 46.7           | 2989                     | 36.9           | 346                  | 28.0           |

|                                                                          |      |      |      |      |      |      |      |      |      |      |     |      |
|--------------------------------------------------------------------------|------|------|------|------|------|------|------|------|------|------|-----|------|
| 1                                                                        | 474  | 12.1 | 3772 | 29.4 | 5892 | 29.9 | 6963 | 33.9 | 3929 | 35.5 | 540 | 32.3 |
| 2                                                                        | 38   | 0.8  | 1006 | 6.8  | 2549 | 10.9 | 2779 | 12.2 | 2260 | 17.4 | 414 | 20.2 |
| 3-5                                                                      | 7    | 0.3  | 276  | 1.9  | 1212 | 5.6  | 1404 | 7.2  | 1219 | 10.2 | 381 | 19.5 |
| Missing                                                                  |      |      |      |      |      |      |      |      |      |      |     |      |
| <b>Gestation at delivery (completed weeks)</b>                           |      |      |      |      |      |      |      |      |      |      |     |      |
| 37                                                                       | 119  | 4.1  | 351  | 3.5  | 530  | 3.6  | 534  | 3.5  | 275  | 3.1  | 52  | 3.2  |
| 38                                                                       | 305  | 11.0 | 1136 | 10.1 | 1743 | 9.9  | 1739 | 9.9  | 971  | 10.2 | 146 | 9.9  |
| 39                                                                       | 783  | 22.5 | 2788 | 24.4 | 4409 | 24.2 | 4439 | 23.5 | 2516 | 23.2 | 410 | 27.2 |
| 40                                                                       | 1292 | 36.7 | 4361 | 36.7 | 6970 | 36.2 | 7090 | 37.5 | 3933 | 35.9 | 639 | 35.0 |
| 41 - 42+0 days                                                           | 855  | 25.7 | 2759 | 25.3 | 4439 | 26.1 | 4651 | 25.6 | 2702 | 27.7 | 434 | 24.7 |
| <b>Planned place of birth</b>                                            |      |      |      |      |      |      |      |      |      |      |     |      |
| OU                                                                       | 1445 | 87.5 | 4150 | 84.9 | 5601 | 82.6 | 4946 | 80.7 | 2571 | 80.2 | 497 | 83.2 |
| AMU                                                                      | 1038 | 8.5  | 3445 | 9.6  | 4958 | 10.1 | 4540 | 10.3 | 2212 | 9.6  | 294 | 7.9  |
| FMU                                                                      | 661  | 3.2  | 2115 | 3.5  | 3242 | 3.8  | 3216 | 3.9  | 1674 | 3.8  | 249 | 3.0  |
| Home                                                                     | 210  | 0.8  | 1685 | 2.0  | 4290 | 3.5  | 5751 | 5.1  | 3940 | 6.4  | 641 | 5.8  |
| <b>Birth weight (grams)</b>                                              |      |      |      |      |      |      |      |      |      |      |     |      |
| < 2500                                                                   | 53   | 1.9  | 146  | 1.8  | 166  | 1.4  | 159  | 1.1  | 75   | 1.0  | 17  | 1.3  |
| 2500 - 2999                                                              | 561  | 18.4 | 1728 | 16.4 | 2281 | 14.5 | 1924 | 12.7 | 1100 | 12.5 | 168 | 12.8 |
| 3000 - 3499                                                              | 1502 | 44.6 | 4678 | 41.1 | 7171 | 39.3 | 6960 | 38.2 | 3644 | 36.5 | 596 | 37.1 |
| 3500 - 3999                                                              | 977  | 28.4 | 3664 | 30.9 | 6256 | 33.4 | 6767 | 35.0 | 3888 | 35.3 | 617 | 36.9 |
| 4000 - 4499                                                              | 233  | 6.0  | 1023 | 8.7  | 1926 | 10.0 | 2294 | 11.4 | 1432 | 12.5 | 239 | 9.9  |
| ≥ 4500                                                                   | 21   | 0.7  | 135  | 1.2  | 262  | 1.5  | 303  | 1.6  | 237  | 2.3  | 40  | 2.0  |
| Missing                                                                  | 7    |      | 21   |      | 29   |      | 46   |      | 21   |      | 4   |      |
| <b>Complicating conditions identified at the start of care in labour</b> |      |      |      |      |      |      |      |      |      |      |     |      |
| Prolonged rupture of membranes > 18 hours                                | 145  | 7.1  | 411  | 6.1  | 678  | 6.5  | 706  | 7.1  | 415  | 7.0  | 78  | 8.9  |
| Meconium stained liquor                                                  | 126  | 5.8  | 322  | 4.8  | 469  | 5.0  | 541  | 6.1  | 295  | 5.9  | 60  | 7.4  |
| Proteinuria 1+ or more                                                   | 79   | 2.3  | 203  | 1.7  | 261  | 1.9  | 226  | 1.6  | 109  | 1.7  | 20  | 1.6  |
| Hypertension                                                             | 55   | 2.6  | 160  | 2.2  | 232  | 2.4  | 207  | 2.0  | 102  | 2.1  | 17  | 2.0  |
| Abnormal vaginal bleeding                                                | 16   | 0.7  | 57   | 0.9  | 79   | 0.9  | 119  | 1.5  | 77   | 2.1  | 16  | 2.1  |

|                                   |            |             |             |             |             |             |             |             |             |             |            |             |
|-----------------------------------|------------|-------------|-------------|-------------|-------------|-------------|-------------|-------------|-------------|-------------|------------|-------------|
| Non-cephalic presentation         | 5          | 0.2         | 31          | 0.5         | 44          | 0.4         | 64          | 0.5         | 46          | 0.7         | 3          | 0.3         |
| Abnormal fetal heart rate         | 41         | 1.5         | 106         | 1.7         | 162         | 1.8         | 143         | 1.7         | 82          | 1.7         | 27         | 3.0         |
| Other complications               | 14         | 0.6         | 24          | 0.3         | 23          | 0.2         | 27          | 0.1         | 11          | 0.2         | 2          | 0.2         |
| <b>Any complicating condition</b> | <b>431</b> | <b>18.5</b> | <b>1175</b> | <b>16.1</b> | <b>1744</b> | <b>16.6</b> | <b>1829</b> | <b>18.0</b> | <b>1001</b> | <b>18.1</b> | <b>199</b> | <b>22.5</b> |

<sup>1</sup> Probability weights are incorporated to account for differences in the probability of a woman being selected for inclusion in the study arising from differences in each unit/trust's period of participation and the stratum specific probabilities of selection of OUs.

**Table 2 Association between maternal age (per 5-year increase) and maternal and perinatal outcomes in low risk women aged between 16 and 40 years old (inclusive)**

|                                          | Nulliparous women         |             |                         |             | Multiparous women         |             |                         |             |
|------------------------------------------|---------------------------|-------------|-------------------------|-------------|---------------------------|-------------|-------------------------|-------------|
|                                          | Unadjusted <sup>1</sup>   |             | Adjusted <sup>1,2</sup> |             | Unadjusted <sup>1</sup>   |             | Adjusted <sup>1,2</sup> |             |
|                                          | RR                        | (95% CI)    | RR                      | (95% CI)    | RR                        | (95% CI)    | RR                      | (95% CI)    |
| Maternal composite                       | 1.13                      | (1.11-1.16) | 1.13                    | (1.11-1.16) | 1.07                      | (1.03-1.13) | 1.08                    | (1.03-1.14) |
| OU                                       | 1.13                      | (1.11-1.16) | 1.12                    | (1.10-1.15) |                           |             |                         |             |
| Non-OU <sup>1,3</sup>                    | 1.22                      | (1.19-1.26) | 1.21                    | (1.18-1.25) |                           |             |                         |             |
|                                          | Wald test for interaction |             |                         |             | Wald test for interaction |             |                         |             |
|                                          | $P^{1,4} < 0.001$         |             |                         |             | $P^{1,4} = 0.34$          |             |                         |             |
| Augmentation                             | 1.13                      | (1.09-1.16) | 1.12                    | (1.08-1.17) | 1.00                      | (0.92-1.08) | 1.01                    | (0.92-1.11) |
| OU                                       | 1.13                      | (1.09-1.17) | 1.12                    | (1.07-1.17) |                           |             |                         |             |
| Non-OU <sup>1,3</sup>                    | 1.25                      | (1.20-1.31) | 1.23                    | (1.18-1.28) |                           |             |                         |             |
|                                          | Wald test for interaction |             |                         |             | Wald test for interaction |             |                         |             |
|                                          | $P^{1,4} < 0.001$         |             |                         |             | $P^{1,4} = 0.24$          |             |                         |             |
| Instrumental delivery                    | 1.20                      | (1.13-1.26) | 1.18                    | (1.12-1.25) | 1.14                      | (1.04-1.25) | 1.15                    | (1.05-1.27) |
|                                          | Wald test for interaction |             |                         |             | Wald test for interaction |             |                         |             |
|                                          | $P^{1,4} = 0.18$          |             |                         |             | $P^{1,4} = 0.06$          |             |                         |             |
| Intrapartum caesarean section            | 1.27                      | (1.23-1.31) | 1.27                    | (1.23-1.32) | 1.16                      | (1.07-1.26) | 1.16                    | (1.06-1.28) |
|                                          | Wald test for interaction |             |                         |             | Wald test for interaction |             |                         |             |
|                                          | $P^{1,4} = 0.26$          |             |                         |             | $P^{1,4} = 0.50$          |             |                         |             |
| General anaesthesia                      | 1.06                      | (0.93-1.20) | 1.06                    | (0.92-1.22) | 1.05                      | (0.87-1.27) | 1.09                    | (0.91-1.32) |
|                                          | Wald test for interaction |             |                         |             | Wald test for interaction |             |                         |             |
|                                          | $P^{1,4} = 0.83$          |             |                         |             | $P^{1,4} = 0.15$          |             |                         |             |
| Maternal blood transfusion               | 1.09                      | (0.97-1.23) | 1.13                    | (0.95-1.34) | 1.23                      | (0.95-1.60) | 1.24                    | (0.94-1.62) |
|                                          | Wald test for interaction |             |                         |             | Wald test for interaction |             |                         |             |
|                                          | $P^{1,4} = 0.38$          |             |                         |             | $P^{1,4} = 0.44$          |             |                         |             |
| Third/fourth degree perineal tear        | 1.17                      | (1.09-1.27) | 1.12                    | (1.02-1.23) | 1.10                      | (0.98-1.23) | 1.01                    | (0.89-1.15) |
|                                          | Wald test for interaction |             |                         |             | Wald test for interaction |             |                         |             |
|                                          | $P^{1,4} = 0.43$          |             |                         |             | $P^{1,4} = 0.29$          |             |                         |             |
| Maternal admission for higher level care | 1.28                      | (1.03-1.58) | 1.46                    | (1.07-1.99) | 1.40                      | (1.01-1.92) | 1.49                    | (1.06-2.10) |
|                                          | Wald test for interaction |             |                         |             | Wald test for interaction |             |                         |             |
|                                          | $P^{1,4} = 0.41$          |             |                         |             | $P^{1,4} = 0.15$          |             |                         |             |
| Perinatal composite                      | 1.07                      | (0.97-1.17) | 1.06                    | (0.95-1.17) | 1.02                      | (0.87-1.19) | 0.98                    | (0.84-1.15) |
|                                          | Wald test for interaction |             |                         |             | Wald test for interaction |             |                         |             |
|                                          | $P^{1,4} = 0.92$          |             |                         |             | $P^{1,4} = 0.66$          |             |                         |             |

<sup>1</sup> Probability weights are incorporated to account for differences in the probability of a woman being selected for inclusion in the study arising from differences in each unit/trust's period of participation and the stratum specific probabilities of selection of OUs.

1  
2  
3  
4  
5 <sup>2</sup> Adjusted for ethnic group, understanding of English, marital/partner status, BMI in pregnancy, index of multiple deprivation score quintile, gestation at  
6 delivery, and planned place of birth (OU vs. AMU vs. FMU vs. home).  
7

8 <sup>3</sup> Results in these rows were adjusted for ethnic group, understanding of English, marital/partner status, BMI in pregnancy, index of multiple deprivation  
9 score quintile, and gestation at delivery.  
10

11 <sup>4</sup> P for interaction, results in these rows were adjusted for ethnic group, understanding of English, marital/partner status, BMI in pregnancy, index of  
12 multiple deprivation score quintile, gestation at delivery, and planned place of birth (OU vs. non-OU).  
13  
14  
15  
16  
17  
18  
19  
20  
21  
22  
23  
24  
25  
26  
27  
28  
29  
30  
31  
32  
33  
34  
35  
36  
37  
38  
39  
40  
41  
42  
43  
44  
45  
46  
47  
48  
49

**Table 3 Intrapartum interventions and adverse maternal outcomes by maternal age in low risk nulliparous women aged 16 and over**

| Age (years)                          | Events / Births<br>n/N | OU                         |             | Events / Births<br>n/N | Non-OU                     |             |
|--------------------------------------|------------------------|----------------------------|-------------|------------------------|----------------------------|-------------|
|                                      |                        | Weighted <sup>1</sup><br>% | (95% CI)    |                        | Weighted <sup>1</sup><br>% | (95% CI)    |
| <b>Maternal composite</b>            |                        |                            |             |                        |                            |             |
| 16-19                                | 480/1239               | 39.4                       | (35.6-43.3) | 252/1553               | 17.5                       | (15.2-20.1) |
| 20-24                                | 1229/2577              | 47.9                       | (44.7-51.1) | 886/3679               | 24.2                       | (21.8-26.8) |
| 25-29                                | 1670/3003              | 55.6                       | (53.4-57.9) | 1680/5354              | 32.3                       | (29.5-35.2) |
| 30-34                                | 1402/2322              | 61.1                       | (57.3-64.8) | 1730/4897              | 36.6                       | (34.2-39.1) |
| 35-39                                | 622/957                | 65.5                       | (61.8-69.1) | 792/1995               | 39.9                       | (36.0-43.9) |
| 40+                                  | 108/148                | 71.9                       | (63.0-79.3) | 83/196                 | 44.8                       | (35.2-54.7) |
| Total                                | 5511/10246             | 54.4                       | (51.9-56.9) | 5423/17674             | 31.3                       | (29.3-33.4) |
| <b>Augmentation</b>                  |                        |                            |             |                        |                            |             |
| 16-19                                | 317/1245               | 25.9                       | (22.5-29.7) | 141/1564               | 8.6                        | (7.0-10.5)  |
| 20-24                                | 790/2584               | 30.7                       | (26.9-34.7) | 489/3706               | 12.9                       | (11.1-14.9) |
| 25-29                                | 1079/3011              | 35.7                       | (33.4-38.1) | 918/5372               | 17.4                       | (15.6-19.3) |
| 30-34                                | 867/2318               | 37.5                       | (34.1-41.1) | 964/4921               | 19.9                       | (18.3-21.7) |
| 35-39                                | 402/955                | 42.2                       | (36.4-48.1) | 473/2015               | 22.6                       | (19.8-25.7) |
| 40+                                  | 71/149                 | 47.6                       | (37.0-58.4) | 44/196                 | 23.7                       | (15.7-34.1) |
| Total                                | 3526/10262             | 34.6                       | (31.9-37.4) | 3029/17774             | 16.9                       | (15.7-18.1) |
| <b>Instrumental delivery</b>         |                        |                            |             |                        |                            |             |
| 16-19                                | 191/1266               | 15.1                       | (12.5-18.2) | 99/1568                | 7.9                        | (6.2-10.2)  |
| 20-24                                | 469/2618               | 17.9                       | (15.9-20.0) | 392/3717               | 10.6                       | (8.9-12.5)  |
| 25-29                                | 707/3039               | 23.4                       | (21.3-25.6) | 772/5391               | 15.0                       | (13.1-17.0) |
| 30-34                                | 591/2349               | 26.3                       | (21.3-32.1) | 795/4950               | 17.0                       | (15.2-19.1) |
| 35-39                                | 275/968                | 29.5                       | (25.0-34.4) | 401/2018               | 19.4                       | (15.9-23.6) |
| 40+                                  | 41/149                 | 30.4                       | (20.0-43.2) | 37/197                 | 21.0                       | (13.3-31.5) |
| Total                                | 2274/10389             | 22.5                       | (19.9-25.3) | 2496/17841             | 14.5                       | (13.0-16.0) |
| <b>Intrapartum caesarean section</b> |                        |                            |             |                        |                            |             |
| 16-19                                | 101/1266               | 8.3                        | (6.5-10.5)  | 55/1568                | 3.3                        | (2.5-4.2)   |
| 20-24                                | 313/2618               | 12.2                       | (10.4-14.2) | 194/3717               | 5.2                        | (4.2-6.5)   |
| 25-29                                | 461/3039               | 15.2                       | (13.3-17.2) | 408/5391               | 8.0                        | (6.9-9.3)   |
| 30-34                                | 466/2349               | 19.8                       | (17.5-22.3) | 452/4950               | 9.0                        | (7.9-10.4)  |
| 35-39                                | 223/968                | 23.0                       | (19.8-26.5) | 212/2018               | 11.2                       | (9.0-13.9)  |
| 40+                                  | 47/149                 | 29.2                       | (20.9-39.3) | 22/197                 | 9.7                        | (5.2-17.2)  |
| Total                                | 1611/10389             | 15.7                       | (14.1-17.5) | 1343/17841             | 7.6                        | (6.8-8.4)   |

<sup>1</sup> Probability weights are incorporated to account for differences in the probability of a woman being selected for inclusion in the study arising from differences in each unit/trust's period of participation and the stratum specific probabilities of selection of OUs.

**Table 4 Relative risk for non-OU compared to OU by age groups in nulliparous women**

| Age (years)               | Unadjusted RR <sup>1</sup><br>(95% CI) | Adjusted RR <sup>1,2</sup> (95% CI) | Adjusted RR <sup>1,3</sup> (95% CI) |
|---------------------------|----------------------------------------|-------------------------------------|-------------------------------------|
| <b>Maternal composite</b> |                                        |                                     |                                     |
| 16-19                     | 0.44 (0.38-0.53)                       | 0.45 (0.38-0.54)                    | 0.49 (0.42-0.58)                    |
| 20-24                     | 0.51 (0.45-0.57)                       | 0.51 (0.45-0.58)                    | 0.55 (0.49-0.62)                    |
| 25-29                     | 0.58 (0.53-0.64)                       | 0.59 (0.54-0.65)                    | 0.63 (0.57-0.70)                    |
| 30-34                     | 0.60 (0.55-0.66)                       | 0.61 (0.56-0.67)                    | 0.66 (0.60-0.73)                    |
| 35-39                     | 0.61 (0.54-0.68)                       | 0.62 (0.56-0.69)                    | 0.68 (0.61-0.76)                    |
| 40+                       | 0.62 (0.49-0.80)                       | 0.66 (0.51-0.87)                    | 0.70 (0.53-0.93)                    |
| <b>Augmentation</b>       |                                        |                                     |                                     |
| 16-19                     | 0.33 (0.26-0.42)                       | 0.34 (0.27-0.44)                    | 0.37 (0.29-0.47)                    |
| 20-24                     | 0.42 (0.35-0.51)                       | 0.43 (0.35-0.52)                    | 0.47 (0.39-0.57)                    |
| 25-29                     | 0.49 (0.43-0.55)                       | 0.50 (0.45-0.57)                    | 0.56 (0.49-0.63)                    |
| 30-34                     | 0.53 (0.47-0.60)                       | 0.55 (0.48-0.63)                    | 0.61 (0.53-0.71)                    |
| 35-39                     | 0.54 (0.44-0.65)                       | 0.54 (0.46-0.64)                    | 0.61 (0.51-0.74)                    |
| 40+                       | 0.50 (0.32-0.78)                       | 0.53 (0.33-0.84)                    | 0.58 (0.36-0.94)                    |

<sup>1</sup> Probability weights are incorporated to account for differences in the probability of a woman being selected for inclusion in the study arising from differences in each unit/trust's period of participation and the stratum specific probabilities of selection of OUs.

<sup>2</sup> Adjusted for ethnic group, understanding of English, marital/partner status, BMI in pregnancy, index of multiple deprivation score quintile, and gestation at delivery.

<sup>3</sup> Adjusted for ethnic group, understanding of English, marital/partner status, BMI in pregnancy, index of multiple deprivation score quintile, gestation at delivery, and complicating conditions identified at the start of care in labour.

**Table 5 Intrapartum interventions and adverse maternal outcomes by maternal age in low risk multiparous women aged 16 and over**

| Age (years)                          | Events / Births<br>n/N | OU                         |             | Events / Births<br>n/N | Non-OU                     |            |
|--------------------------------------|------------------------|----------------------------|-------------|------------------------|----------------------------|------------|
|                                      |                        | Weighted <sup>1</sup><br>% | (95% CI)    |                        | Weighted <sup>1</sup><br>% | (95% CI)   |
| <b>Maternal composite</b>            |                        |                            |             |                        |                            |            |
| 16-19                                | 35/177                 | 20.2                       | (14.1-28.0) | 20/338                 | 6.6                        | (4.1-10.6) |
| 20-24                                | 242/1506               | 16.2                       | (13.8-19.0) | 146/3486               | 4.6                        | (3.6-5.8)  |
| 25-29                                | 468/2504               | 18.9                       | (16.9-20.9) | 297/6989               | 4.8                        | (4.1-5.7)  |
| 30-34                                | 492/2548               | 19.2                       | (16.8-21.8) | 418/8440               | 5.4                        | (4.7-6.2)  |
| 35-39                                | 344/1575               | 21.9                       | (19.4-24.7) | 273/5737               | 5.6                        | (4.8-6.6)  |
| 40+                                  | 82/340                 | 24.1                       | (20.7-28.0) | 65/975                 | 7.4                        | (5.6-9.7)  |
| Total                                | 1663/8650              | 19.3                       | (17.6-21.1) | 1219/25965             | 5.3                        | (4.7-5.9)  |
| <b>Augmentation</b>                  |                        |                            |             |                        |                            |            |
| 16-19                                | 19/178                 | 10.5                       | (5.9-17.9)  | 11/340                 | 3.8                        | (2.0-7.1)  |
| 20-24                                | 144/1516               | 9.4                        | (7.5-11.8)  | 62/3520                | 2.0                        | (1.4-2.7)  |
| 25-29                                | 247/2529               | 9.9                        | (8.2-12.0)  | 109/7077               | 1.8                        | (1.4-2.3)  |
| 30-34                                | 255/2572               | 9.7                        | (8.0-11.7)  | 132/8535               | 1.6                        | (1.3-2.0)  |
| 35-39                                | 156/1592               | 9.8                        | (8.2-11.6)  | 89/5796                | 1.8                        | (1.3-2.5)  |
| 40+                                  | 42/345                 | 12.2                       | (9.5-15.5)  | 18/985                 | 1.8                        | (1.1-3.2)  |
| Total                                | 863/8732               | 9.8                        | (8.5-11.4)  | 421/26253              | 1.8                        | (1.5-2.1)  |
| <b>Instrumental delivery</b>         |                        |                            |             |                        |                            |            |
| 16-19                                | 12/179                 | 7.5                        | (3.6-14.9)  | 7/340                  | 3.1                        | (1.3-7.1)  |
| 20-24                                | 55/1530                | 3.6                        | (2.7-4.9)   | 38/3520                | 1.4                        | (1.0-2.0)  |
| 25-29                                | 139/2557               | 5.5                        | (4.6-6.5)   | 102/7092               | 1.8                        | (1.4-2.3)  |
| 30-34                                | 159/2594               | 6.1                        | (5.0-7.5)   | 124/8544               | 1.6                        | (1.2-2.0)  |
| 35-39                                | 102/1600               | 6.6                        | (5.0-8.6)   | 82/5802                | 1.8                        | (1.4-2.4)  |
| 40+                                  | 30/347                 | 8.8                        | (5.5-13.8)  | 17/987                 | 2.5                        | (1.3-4.7)  |
| Total                                | 497/8807               | 5.7                        | (4.9-6.7)   | 370/26285              | 1.7                        | (1.4-2.1)  |
| <b>Intrapartum caesarean section</b> |                        |                            |             |                        |                            |            |
| 16-19                                | 6/179                  | 3.4                        | (1.4-7.7)   | 4/340                  | 0.9                        | (0.3-2.5)  |
| 20-24                                | 62/1530                | 4.1                        | (2.6-6.3)   | 21/3520                | 0.6                        | (0.3-1.1)  |
| 25-29                                | 121/2557               | 4.8                        | (3.8-6.1)   | 48/7092                | 0.7                        | (0.5-0.9)  |
| 30-34                                | 134/2594               | 5.1                        | (4.0-6.5)   | 70/8544                | 0.9                        | (0.6-1.2)  |
| 35-39                                | 110/1600               | 6.8                        | (5.1-9.1)   | 53/5802                | 1.1                        | (0.8-1.5)  |
| 40+                                  | 16/347                 | 4.8                        | (3.1-7.4)   | 15/987                 | 1.5                        | (0.8-2.7)  |
| Total                                | 449/8807               | 5.1                        | (4.2-6.3)   | 211/26285              | 0.8                        | (0.7-1.1)  |

<sup>1</sup> Probability weights are incorporated to account for differences in the probability of a woman being selected for inclusion in the study arising from differences in each unit/trust's period of participation and the stratum specific probabilities of selection of OUs.



Table 6 Perinatal outcomes by maternal age in low risk women aged 16 and over

| Age (years)        | OU                     |                                     | Non-OU                 |                                     |
|--------------------|------------------------|-------------------------------------|------------------------|-------------------------------------|
|                    | Events / Births<br>n/N | Weighted <sup>1</sup><br>% (95% CI) | Events / Births<br>n/N | Weighted <sup>1</sup><br>% (95% CI) |
| <b>Nulliparous</b> |                        |                                     |                        |                                     |
| 16-19              | 39/1260                | 3.2 (2.2-4.5)                       | 31/1553                | 2.9 (1.9-4.4)                       |
| 20-24              | 89/2610                | 3.5 (2.5-5.0)                       | 94/3700                | 2.4 (1.9-3.2)                       |
| 25-29              | 92/3026                | 3.3 (2.6-4.0)                       | 123/5357               | 2.1 (1.7-2.8)                       |
| 30-34              | 101/2340               | 4.2 (3.1-5.6)                       | 128/4918               | 3.0 (2.2-4.0)                       |
| 35-39              | 37/962                 | 3.9 (2.8-5.4)                       | 65/1999                | 3.0 (2.1-4.1)                       |
| 40+                | 10/149                 | 7.5 (3.4-15.7)                      | 8/195                  | 3.9 (1.0-14.0)                      |
| Total              | 368/10347              | 3.7 (2.9-4.6)                       | 449/17722              | 2.6 (2.2-3.1)                       |
| <b>Multiparous</b> |                        |                                     |                        |                                     |
| 16-19              | 6/179                  | 3.0 (1.4-6.4)                       | 5/337                  | 1.7 (0.6-4.6)                       |
| 20-24              | 26/1519                | 1.8 (1.2-2.7)                       | 43/3489                | 1.3 (0.8-2.0)                       |
| 25-29              | 41/2547                | 1.6 (1.2-2.3)                       | 73/7032                | 1.1 (0.8-1.6)                       |
| 30-34              | 50/2578                | 2.0 (1.5-2.6)                       | 111/8468               | 1.2 (1.0-1.5)                       |
| 35-39              | 33/1594                | 2.1 (1.3-3.3)                       | 88/5761                | 1.6 (1.2-2.2)                       |
| 40+                | 7/345                  | 2.1 (0.9-4.6)                       | 20/978                 | 2.3 (1.3-4.1)                       |
| Total              | 163/8762               | 1.9 (1.5-2.4)                       | 340/26065              | 1.3 (1.1-1.6)                       |

<sup>1</sup> Probability weights are incorporated to account for differences in the probability of a woman being selected for inclusion in the study arising from differences in each unit/trust's period of participation and the stratum specific probabilities of selection of OUs.

## Table of Contents

|                                                                                                                                                                                                                              |    |
|------------------------------------------------------------------------------------------------------------------------------------------------------------------------------------------------------------------------------|----|
| Figure S1 Association between maternal age and less common intrapartum interventions and adverse maternal outcomes in low risk women aged 16 and over .....                                                                  | 2  |
| Figure S2 Association between maternal age and epidural in low risk women aged 16 and over .....                                                                                                                             | 3  |
| Table S1 Categorisation of potential confounders .....                                                                                                                                                                       | 4  |
| Table S2 Characteristics of low risk nulliparous women aged 16 and over by maternal age category..                                                                                                                           | 5  |
| Table S3 Characteristics of low risk multiparous women aged 16 and over by maternal age category                                                                                                                             | 7  |
| Table S4 Sample size of low risk women aged 40 and over by planned place of birth and parity .....                                                                                                                           | 9  |
| Table S5 Association between maternal age and intrapartum interventions and adverse maternal outcomes in low risk women aged between 16 and 40 years old (inclusive) additionally adjusted for complicating conditions ..... | 12 |
| Table S6 Less common intrapartum interventions and adverse maternal outcomes by maternal age in low risk nulliparous women aged 16 and over .....                                                                            | 13 |
| Table S7 Less common intrapartum interventions and adverse maternal outcomes by maternal age in low risk multiparous women aged 16 and over.....                                                                             | 14 |
| Table S8 Event rates in restricted sample of nulliparous women aged 16 and over without complicating conditions identified at the start of care in labour .....                                                              | 15 |
| Table S9 Event rates in restricted sample of multiparous women aged 16 and over without complicating conditions identified at the start of care in labour .....                                                              | 16 |
| Table S10 Relative risk for non-OU compared to OU by age groups in nulliparous women without complicating conditions .....                                                                                                   | 17 |

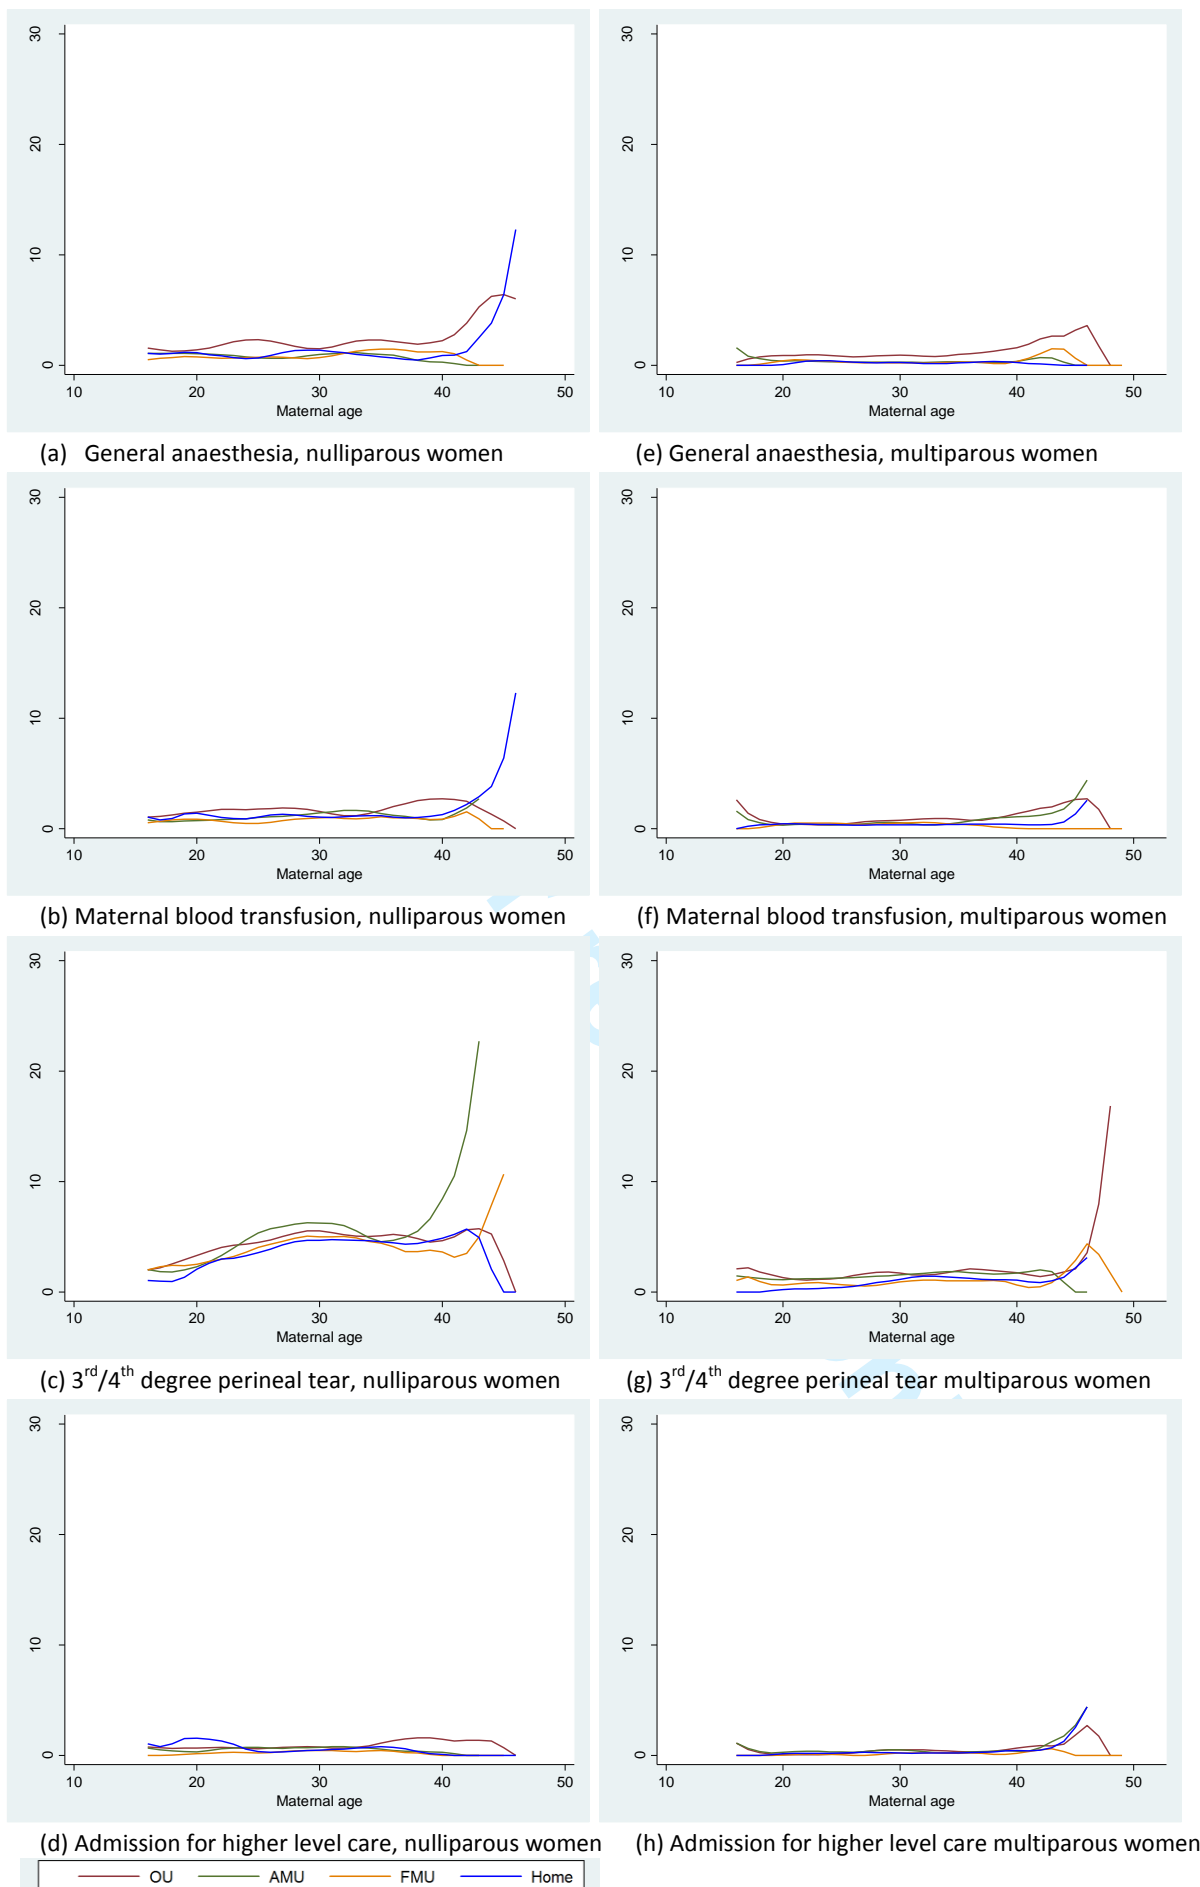

Figure S1 Association between maternal age and less common intrapartum interventions and adverse maternal outcomes in low risk women aged 16 and over

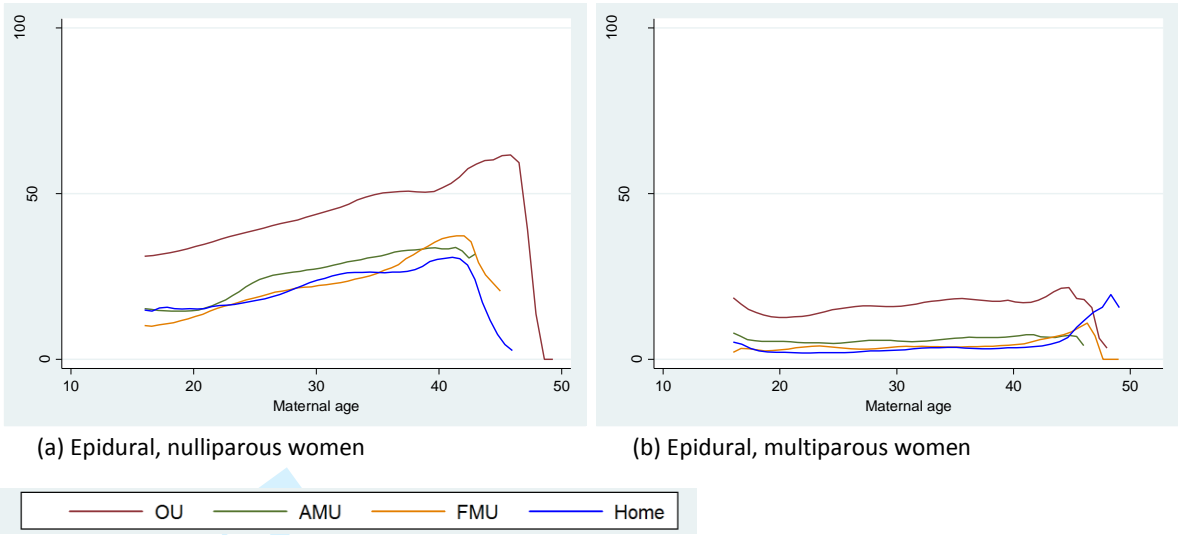

Figure S2 Association between maternal age and epidural in low risk women aged 16 and over

1  
2  
3  
4  
5  
6  
7  
8  
9  
10  
11  
12  
13  
14  
15  
16  
17  
18  
19  
20  
21  
22  
23  
24  
25  
26  
27  
28  
29  
30  
31  
32  
33  
34  
35  
36  
37  
38  
39  
40  
41  
42  
43  
44  
45  
46  
47  
48  
49  
50  
51  
52  
53  
54  
55  
56  
57  
58  
59  
60

For peer review only

Table S1 Categorisation of potential confounders

| Covariate                                                         | Response categories                                                                                                                                                                 | Alternative categories in case of few events                                                   |
|-------------------------------------------------------------------|-------------------------------------------------------------------------------------------------------------------------------------------------------------------------------------|------------------------------------------------------------------------------------------------|
| Ethnic group                                                      | 1 White<br>2 Non-white                                                                                                                                                              |                                                                                                |
| Understanding of English                                          | 1 Fluent<br>2 Not fluent (some/none)                                                                                                                                                |                                                                                                |
| Marital/partner status                                            | 1 Married/living with partner<br>2 Single/unsupported by partner                                                                                                                    |                                                                                                |
| BMI in pregnancy (kg/m <sup>2</sup> )                             | 1 Less than 18.5<br>2 18.5 to 24.9<br>3 25.0 to 29.9<br>4 30.0 to 35.0<br>5 Not recorded                                                                                            |                                                                                                |
| Index of Multiple Deprivation (IMD) quintile                      | 1 1 <sup>st</sup> quintile (least deprived)<br>2 2 <sup>nd</sup> quintile<br>3 3 <sup>rd</sup> quintile<br>4 4 <sup>th</sup> quintile<br>5 5 <sup>th</sup> quintile (most deprived) | 1 1 <sup>st</sup> to 3 <sup>rd</sup> quintile<br>2 4 <sup>th</sup> to 5 <sup>th</sup> quintile |
| Previous pregnancies ≥24 weeks                                    | 1 0 Nulliparous<br>2 1 previous<br>3 2 previous<br>4 3 or more previous                                                                                                             | 1 Nulliparous<br>2 Multiparous                                                                 |
| Gestation at delivery (completed weeks)                           | 1 37 weeks<br>2 38 weeks<br>3 39 weeks<br>4 40 weeks<br>5 41 weeks to 42 weeks+0 days                                                                                               | 1 37 - 39 weeks<br>2 ≥ 40 weeks                                                                |
| Planned place of birth                                            | 1 Obstetric unit<br>2 Alongside midwifery unit<br>3 Freestanding midwifery unit<br>4 Home                                                                                           |                                                                                                |
| Complicating conditions identified at the start of care in labour | 1 No complicating conditions<br>2 One or more complicating conditions                                                                                                               |                                                                                                |

Table S2 Characteristics of low risk nulliparous women aged 16 and over by maternal age category

|                                                | 16 - 19 years<br>n=2835 |                | 20 - 24 years<br>n=6341 |                | 25 - 29 years<br>n=8438 |                | 30 - 34 years<br>n=7307 |                | 35 - 39 years<br>n=2989 |                | ≥ 40 years<br>n=346 |                |
|------------------------------------------------|-------------------------|----------------|-------------------------|----------------|-------------------------|----------------|-------------------------|----------------|-------------------------|----------------|---------------------|----------------|
|                                                | n                       | % <sup>1</sup> | n                   | % <sup>1</sup> |
| <b>Ethnic group</b>                            |                         |                |                         |                |                         |                |                         |                |                         |                |                     |                |
| White                                          | 2600                    | 90.4           | 5329                    | 80.6           | 7085                    | 78.5           | 6434                    | 82.7           | 2686                    | 86.0           | 314                 | 86.1           |
| Non-white                                      | 234                     | 9.6            | 1004                    | 19.4           | 1340                    | 21.5           | 859                     | 17.3           | 298                     | 14.0           | 31                  | 13.9           |
| Missing                                        | 1                       |                | 8                       |                | 13                      |                | 14                      |                | 5                       |                | 1                   |                |
| <b>Understanding of English</b>                |                         |                |                         |                |                         |                |                         |                |                         |                |                     |                |
| Fluent                                         | 2749                    | 96.8           | 5709                    | 88.6           | 7757                    | 89.8           | 6999                    | 94.4           | 2931                    | 97.5           | 341                 | 98.7           |
| Not fluent                                     | 81                      | 3.2            | 602                     | 11.4           | 636                     | 10.2           | 276                     | 5.7            | 48                      | 2.5            | 3                   | 1.3            |
| Missing                                        | 5                       |                | 30                      |                | 45                      |                | 32                      |                | 10                      |                | 2                   |                |
| <b>Marital/partner status</b>                  |                         |                |                         |                |                         |                |                         |                |                         |                |                     |                |
| Married/living with partner                    | 1484                    | 50.2           | 5171                    | 80.1           | 7869                    | 92.2           | 7015                    | 95.9           | 2854                    | 94.9           | 320                 | 92.8           |
| Single/unsupported by partner                  | 1284                    | 49.8           | 1072                    | 19.9           | 474                     | 7.8            | 217                     | 4.1            | 97                      | 5.1            | 23                  | 7.3            |
| Missing                                        | 67                      |                | 98                      |                | 95                      |                | 75                      |                | 38                      |                | 3                   |                |
| <b>BMI in pregnancy (kg/m<sup>2</sup>)</b>     |                         |                |                         |                |                         |                |                         |                |                         |                |                     |                |
| < 18.5                                         | 163                     | 6.2            | 237                     | 3.9            | 183                     | 2.6            | 140                     | 2.2            | 49                      | 1.6            | 0                   | 0.0            |
| 18.5 - 24.9                                    | 1510                    | 51.0           | 3136                    | 47.8           | 4216                    | 47.2           | 3813                    | 48.7           | 1441                    | 46.0           | 170                 | 44.8           |
| 25.0 - 29.9                                    | 494                     | 18.1           | 1358                    | 20.9           | 1897                    | 23.6           | 1528                    | 21.7           | 682                     | 25.6           | 74                  | 24.3           |
| 30.0 - 35.0                                    | 189                     | 7.1            | 535                     | 9.0            | 641                     | 8.3            | 438                     | 7.6            | 192                     | 8.1            | 21                  | 8.0            |
| Not recorded                                   | 477                     | 17.7           | 1059                    | 18.4           | 1477                    | 18.3           | 1363                    | 19.9           | 616                     | 18.8           | 80                  | 22.9           |
| Missing                                        | 2                       |                | 16                      |                | 24                      |                | 25                      |                | 9                       |                | 1                   |                |
| <b>IMD quintile</b>                            |                         |                |                         |                |                         |                |                         |                |                         |                |                     |                |
| 1 <sup>st</sup> (Least deprived)               | 212                     | 7.2            | 670                     | 9.2            | 1475                    | 14.5           | 1667                    | 21.4           | 741                     | 22.8           | 89                  | 26.9           |
| 2 <sup>nd</sup>                                | 356                     | 12.6           | 940                     | 14.5           | 1690                    | 19.7           | 1641                    | 22.1           | 689                     | 22.0           | 89                  | 23.8           |
| 3 <sup>rd</sup>                                | 538                     | 17.7           | 1239                    | 18.9           | 1769                    | 19.3           | 1544                    | 20.7           | 633                     | 21.1           | 69                  | 20.0           |
| 4 <sup>th</sup>                                | 689                     | 25.3           | 1525                    | 23.6           | 1808                    | 22.7           | 1455                    | 20.7           | 558                     | 20.3           | 56                  | 16.9           |
| 5 <sup>th</sup> (Most deprived)                | 1025                    | 37.2           | 1932                    | 33.8           | 1663                    | 23.7           | 972                     | 15.2           | 353                     | 13.9           | 40                  | 12.5           |
| Missing                                        | 15                      |                | 35                      |                | 33                      |                | 28                      |                | 15                      |                | 3                   |                |
| <b>Gestation at delivery (completed weeks)</b> |                         |                |                         |                |                         |                |                         |                |                         |                |                     |                |
| 37                                             | 93                      | 3.7            | 189                     | 3.4            | 275                     | 4.0            | 243                     | 3.7            | 90                      | 3.2            | 9                   | 2.4            |
| 38                                             | 255                     | 10.9           | 631                     | 10.1           | 813                     | 9.8            | 717                     | 9.6            | 287                     | 9.3            | 29                  | 6.0            |
| 39                                             | 649                     | 21.9           | 1462                    | 23.5           | 1989                    | 23.3           | 1652                    | 22.2           | 700                     | 23.3           | 76                  | 23.6           |
| 40                                             | 1075                    | 36.5           | 2393                    | 36.3           | 3107                    | 34.3           | 2688                    | 36.6           | 1076                    | 35.0           | 132                 | 36.5           |
| 41 - 42+0 days                                 | 763                     | 27.1           | 1666                    | 26.8           | 2254                    | 28.6           | 2007                    | 27.9           | 836                     | 29.2           | 100                 | 31.6           |

|                                                                          |            |             |            |             |             |             |             |             |            |             |           |             |
|--------------------------------------------------------------------------|------------|-------------|------------|-------------|-------------|-------------|-------------|-------------|------------|-------------|-----------|-------------|
| <b>Planned place of birth</b>                                            |            |             |            |             |             |             |             |             |            |             |           |             |
| OU                                                                       | 1266       | 88.0        | 2620       | 86.6        | 3043        | 85.0        | 2351        | 83.5        | 968        | 84.4        | 149       | 89.2        |
| AMU                                                                      | 882        | 8.4         | 2040       | 9.3         | 2535        | 9.7         | 1984        | 10.0        | 752        | 9.2         | 56        | 5.9         |
| FMU                                                                      | 564        | 3.2         | 1235       | 3.3         | 1531        | 3.3         | 1302        | 3.4         | 456        | 2.7         | 47        | 2.0         |
| Home                                                                     | 123        | 0.5         | 446        | 0.8         | 1329        | 2.0         | 1670        | 3.2         | 813        | 3.7         | 94        | 3.0         |
| <b>Birth weight (grams)</b>                                              |            |             |            |             |             |             |             |             |            |             |           |             |
| < 2500                                                                   | 46         | 2.0         | 105        | 2.1         | 88          | 1.4         | 87          | 1.3         | 43         | 1.5         | 6         | 1.9         |
| 2500 - 2999                                                              | 470        | 17.8        | 1053       | 17.4        | 1209        | 16.0        | 914         | 14.1        | 453        | 16.2        | 48        | 10.9        |
| 3000 - 3499                                                              | 1286       | 44.7        | 2709       | 43.0        | 3536        | 41.1        | 3053        | 41.0        | 1167       | 38.8        | 139       | 43.0        |
| 3500 - 3999                                                              | 826        | 28.8        | 1913       | 28.9        | 2782        | 31.8        | 2481        | 33.4        | 997        | 32.1        | 110       | 32.3        |
| 4000 - 4499                                                              | 185        | 6.0         | 487        | 7.6         | 734         | 8.5         | 669         | 8.7         | 282        | 10.0        | 38        | 9.2         |
| ≥ 4500                                                                   | 15         | 0.7         | 64         | 0.9         | 77          | 1.1         | 82          | 1.5         | 40         | 1.5         | 5         | 2.7         |
| Missing                                                                  | 7          |             | 10         |             | 12          |             | 21          |             | 7          |             | 0         |             |
| <b>Complicating conditions identified at the start of care in labour</b> |            |             |            |             |             |             |             |             |            |             |           |             |
| Prolonged rupture of membranes > 18 hours                                | 130        | 7.2         | 293        | 7.4         | 457         | 8.7         | 466         | 10.6        | 209        | 10.8        | 34        | 14.7        |
| Meconium stained liquor                                                  | 112        | 5.9         | 220        | 5.6         | 285         | 6.0         | 286         | 7.4         | 127        | 7.6         | 16        | 6.1         |
| Proteinuria 1+ or more                                                   | 73         | 2.4         | 150        | 2.1         | 161         | 2.4         | 129         | 2.0         | 49         | 2.5         | 8         | 3.5         |
| Hypertension                                                             | 51         | 2.8         | 128        | 2.9         | 156         | 3.2         | 127         | 2.8         | 48         | 3.6         | 10        | 5.0         |
| Abnormal vaginal bleeding                                                | 16         | 0.8         | 38         | 1.0         | 54          | 1.2         | 66          | 1.8         | 42         | 3.3         | 7         | 2.9         |
| Non-cephalic presentation                                                | 5          | 0.2         | 20         | 0.5         | 29          | 0.4         | 38          | 0.7         | 18         | 0.7         | 1         | 0.5         |
| Abnormal fetal heart rate                                                | 35         | 1.5         | 79         | 2.1         | 108         | 2.3         | 83          | 2.1         | 41         | 2.6         | 9         | 3.7         |
| Other complications                                                      | 14         | 0.6         | 15         | 0.3         | 16          | 0.2         | 14          | 0.2         | 5          | 0.3         | 0         | 0.0         |
| <b>Any complicating conditions</b>                                       | <b>390</b> | <b>19.0</b> | <b>825</b> | <b>19.1</b> | <b>1112</b> | <b>21.0</b> | <b>1073</b> | <b>24.1</b> | <b>465</b> | <b>25.7</b> | <b>73</b> | <b>32.2</b> |

<sup>1</sup>Probability weights are incorporated to account for differences in the probability of a woman being selected for inclusion in the study arising from differences in each unit/trust's period of participation and the stratum specific probabilities of selection of OUs.

Table S3 Characteristics of low risk multiparous women aged 16 and over by maternal age category

|                                            | 16-19 years<br>n=519 |                | 20 - 24 years<br>n=5054 |                | 25 - 29 years<br>n=9653 |                | 30 - 34 years<br>n=11146 |                | 35 - 39 years<br>n=7408 |                | ≥ 40 years<br>n=1335 |                |
|--------------------------------------------|----------------------|----------------|-------------------------|----------------|-------------------------|----------------|--------------------------|----------------|-------------------------|----------------|----------------------|----------------|
|                                            | n                    | % <sup>1</sup> | n                       | % <sup>1</sup> | n                       | % <sup>1</sup> | n                        | % <sup>1</sup> | n                       | % <sup>1</sup> | n                    | % <sup>1</sup> |
| <b>Ethnic group</b>                        |                      |                |                         |                |                         |                |                          |                |                         |                |                      |                |
| White                                      | 478                  | 88.2           | 4356                    | 82.1           | 8061                    | 76.3           | 9618                     | 78.9           | 6653                    | 83.2           | 1213                 | 86.8           |
| Non-white                                  | 41                   | 11.8           | 693                     | 17.9           | 1580                    | 23.7           | 1516                     | 21.1           | 746                     | 16.8           | 122                  | 13.2           |
| Missing                                    | 0                    |                | 5                       |                | 12                      |                | 12                       |                | 9                       |                | 0                    |                |
| <b>Understanding of English</b>            |                      |                |                         |                |                         |                |                          |                |                         |                |                      |                |
| Fluent                                     | 505                  | 96.3           | 4685                    | 91.3           | 9000                    | 90.3           | 10606                    | 91.7           | 7224                    | 95.6           | 1297                 | 95.9           |
| Not fluent                                 | 13                   | 3.8            | 346                     | 8.8            | 615                     | 9.7            | 500                      | 8.3            | 166                     | 4.5            | 33                   | 4.1            |
| Missing                                    | 1                    |                | 23                      |                | 38                      |                | 40                       |                | 18                      |                | 5                    |                |
| <b>Marital/partner status</b>              |                      |                |                         |                |                         |                |                          |                |                         |                |                      |                |
| Married/living with partner                | 352                  | 63.0           | 4379                    | 84.5           | 8999                    | 92.0           | 10767                    | 96.3           | 7150                    | 95.6           | 1271                 | 95.0           |
| Single/unsupported by partner              | 156                  | 37.1           | 605                     | 15.5           | 536                     | 8.0            | 276                      | 3.7            | 196                     | 4.4            | 45                   | 5.0            |
| Missing                                    | 11                   |                | 70                      |                | 118                     |                | 103                      |                | 62                      |                | 19                   |                |
| <b>BMI in pregnancy (kg/m<sup>2</sup>)</b> |                      |                |                         |                |                         |                |                          |                |                         |                |                      |                |
| < 18.5                                     | 21                   | 5.9            | 189                     | 4.6            | 230                     | 2.6            | 197                      | 2.0            | 107                     | 1.5            | 18                   | 0.3            |
| 18.5 - 24.9                                | 243                  | 45.8           | 2180                    | 42.2           | 4344                    | 44.4           | 5246                     | 45.0           | 3423                    | 43.7           | 632                  | 47.0           |
| 25.0 - 29.9                                | 104                  | 17.2           | 1200                    | 23.1           | 2444                    | 25.7           | 2678                     | 24.6           | 1890                    | 27.6           | 341                  | 28.9           |
| 30.0 - 35.0                                | 44                   | 10.4           | 561                     | 11.7           | 986                     | 10.5           | 961                      | 10.0           | 577                     | 9.3            | 88                   | 8.1            |
| Not recorded                               | 104                  | 20.7           | 910                     | 18.5           | 1614                    | 16.9           | 2026                     | 18.5           | 1384                    | 17.9           | 249                  | 15.7           |
| Missing                                    | 3                    |                | 14                      |                | 35                      |                | 38                       |                | 27                      |                | 7                    |                |
| <b>IMD quintile</b>                        |                      |                |                         |                |                         |                |                          |                |                         |                |                      |                |
| 1 <sup>st</sup> (Least deprived)           | 33                   | 3.6            | 432                     | 7.4            | 1400                    | 13.0           | 2588                     | 19.6           | 2042                    | 25.7           | 345                  | 25.6           |
| 2 <sup>nd</sup>                            | 49                   | 10.0           | 581                     | 11.4           | 1569                    | 15.0           | 2473                     | 21.4           | 1745                    | 22.4           | 307                  | 21.3           |
| 3 <sup>rd</sup>                            | 99                   | 21.2           | 876                     | 16.4           | 1888                    | 17.7           | 2215                     | 19.0           | 1502                    | 19.4           | 288                  | 22.2           |
| 4 <sup>th</sup>                            | 138                  | 25.6           | 1259                    | 24.6           | 2149                    | 22.6           | 2024                     | 18.9           | 1207                    | 16.5           | 235                  | 16.8           |
| 5 <sup>th</sup> (Most deprived)            | 196                  | 39.6           | 1889                    | 40.2           | 2599                    | 31.7           | 1787                     | 21.1           | 862                     | 16.0           | 157                  | 14.1           |
| Missing                                    | 4                    |                | 17                      |                | 48                      |                | 59                       |                | 50                      |                | 3                    |                |
| <b>Previous pregnancies ≥ 24 weeks</b>     |                      |                |                         |                |                         |                |                          |                |                         |                |                      |                |
| 1                                          | 474                  | 91.6           | 3772                    | 77.1           | 5892                    | 64.5           | 6963                     | 63.6           | 3929                    | 56.3           | 540                  | 44.9           |
| 2                                          | 38                   | 6.3            | 1006                    | 17.9           | 2549                    | 23.4           | 2779                     | 22.9           | 2260                    | 27.5           | 414                  | 28.0           |
| 3-5                                        | 7                    | 2.2            | 276                     | 5.0            | 1212                    | 12.1           | 1404                     | 13.5           | 1219                    | 16.2           | 381                  | 27.1           |



|                                                                          |           |             |            |             |            |             |            |             |            |             |            |             |
|--------------------------------------------------------------------------|-----------|-------------|------------|-------------|------------|-------------|------------|-------------|------------|-------------|------------|-------------|
| <b>Gestation at delivery (completed weeks)</b>                           |           |             |            |             |            |             |            |             |            |             |            |             |
| 37                                                                       | 26        | 6.9         | 162        | 3.8         | 255        | 3.2         | 291        | 3.4         | 185        | 3.0         | 43         | 3.6         |
| 38                                                                       | 50        | 12.3        | 505        | 10.0        | 930        | 10.0        | 1022       | 10.3        | 684        | 10.8        | 117        | 11.4        |
| 39                                                                       | 134       | 26.5        | 1326       | 26.0        | 2420       | 25.2        | 2787       | 24.5        | 1816       | 23.1        | 334        | 28.6        |
| 40                                                                       | 217       | 37.7        | 1968       | 37.4        | 3863       | 38.4        | 4402       | 38.2        | 2857       | 36.3        | 507        | 34.4        |
| 41 - 42+0 days                                                           | 92        | 16.7        | 1093       | 22.8        | 2185       | 23.2        | 2644       | 23.6        | 1866       | 26.8        | 334        | 22.0        |
| <b>Planned place of birth</b>                                            |           |             |            |             |            |             |            |             |            |             |            |             |
| OU                                                                       | 179       | 84.6        | 1530       | 82.2        | 2558       | 79.8        | 2595       | 78.3        | 1603       | 77.7        | 348        | 80.9        |
| AMU                                                                      | 156       | 9.6         | 1405       | 10.0        | 2423       | 10.6        | 2556       | 10.5        | 1460       | 9.8         | 238        | 8.7         |
| FMU                                                                      | 97        | 3.4         | 880        | 3.9         | 1711       | 4.4         | 1914       | 4.4         | 1218       | 4.5         | 202        | 3.4         |
| Home                                                                     | 87        | 2.5         | 1239       | 3.9         | 2961       | 5.3         | 4081       | 6.7         | 3127       | 8.0         | 547        | 6.9         |
| <b>Birth weight (grams)</b>                                              |           |             |            |             |            |             |            |             |            |             |            |             |
| < 2500                                                                   | 7         | 0.8         | 41         | 1.3         | 78         | 1.3         | 72         | 1.0         | 32         | 0.7         | 11         | 1.1         |
| 2500 - 2999                                                              | 91        | 22.7        | 675        | 14.6        | 1072       | 12.7        | 1010       | 11.5        | 647        | 10.3        | 120        | 13.5        |
| 3000 - 3499                                                              | 216       | 44.0        | 1969       | 37.9        | 3635       | 37.3        | 3907       | 35.8        | 2477       | 35.2        | 457        | 34.9        |
| 3500 - 3999                                                              | 151       | 26.0        | 1751       | 34.0        | 3474       | 35.2        | 4286       | 36.3        | 2891       | 37.1        | 507        | 38.7        |
| 4000 - 4499                                                              | 48        | 6.1         | 536        | 10.6        | 1192       | 11.6        | 1625       | 13.8        | 1150       | 14.0        | 201        | 10.1        |
| ≥ 4500                                                                   | 6         | 0.5         | 71         | 1.7         | 185        | 1.9         | 221        | 1.6         | 197        | 2.8         | 35         | 1.8         |
| Missing                                                                  | 0         |             | 11         |             | 17         |             | 25         |             | 14         |             | 4          |             |
| <b>Complicating conditions identified at the start of care in labour</b> |           |             |            |             |            |             |            |             |            |             |            |             |
| Prolonged rupture of membranes > 18 hours                                | 15        | 6.1         | 118        | 4.0         | 221        | 4.0         | 240        | 4.0         | 206        | 4.8         | 44         | 6.6         |
| Meconium stained liquor                                                  | 14        | 5.6         | 102        | 3.7         | 184        | 3.8         | 255        | 4.9         | 168        | 4.9         | 44         | 7.9         |
| Proteinuria 1+ or more                                                   | 6         | 1.9         | 53         | 0.9         | 100        | 1.3         | 97         | 1.2         | 60         | 1.2         | 12         | 0.9         |
| Hypertension                                                             | 4         | 1.6         | 32         | 0.9         | 76         | 1.5         | 80         | 1.4         | 54         | 1.2         | 7          | 0.8         |
| Abnormal vaginal bleeding                                                | 0         | 0.0         | 19         | 0.8         | 25         | 0.5         | 53         | 1.2         | 35         | 1.4         | 9          | 1.8         |
| Non-cephalic presentation                                                | 0         | 0.0         | 11         | 0.4         | 15         | 0.3         | 26         | 0.4         | 28         | 0.8         | 2          | 0.3         |
| Abnormal fetal heart rate                                                | 6         | 1.9         | 27         | 1.0         | 54         | 1.2         | 60         | 1.3         | 41         | 1.2         | 18         | 2.8         |
| Other complications                                                      | 0         | 0.0         | 9          | 0.3         | 7          | 0.2         | 13         | 0.1         | 6          | 0.2         | 2          | 0.3         |
| <b>Any complicating conditions</b>                                       | <b>41</b> | <b>15.5</b> | <b>350</b> | <b>11.2</b> | <b>632</b> | <b>11.5</b> | <b>756</b> | <b>12.7</b> | <b>536</b> | <b>13.6</b> | <b>126</b> | <b>18.7</b> |

<sup>1</sup> Probability weights are incorporated to account for differences in the probability of a woman being selected for inclusion in the study arising from differences in each unit/trust's period of participation and the stratum specific probabilities of selection of OUs.

Table S4 Sample size of low risk women aged 40 and over by planned place of birth and parity

| Age (years)  | Nulliparous women |           |           |           | Multiparous women |            |            |            |
|--------------|-------------------|-----------|-----------|-----------|-------------------|------------|------------|------------|
|              | OU                | AMU       | FMU       | Home      | OU                | AMU        | FMU        | Home       |
| 40           | 64                | 32        | 24        | 38        | 157               | 103        | 93         | 242        |
| 41           | 31                | 17        | 11        | 26        | 86                | 63         | 47         | 147        |
| 42           | 24                | 6         | 3         | 13        | 53                | 39         | 25         | 83         |
| 43           | 12                | 1         | 2         | 10        | 29                | 18         | 22         | 37         |
| 44           | 14                | 0         | 4         | 4         | 12                | 10         | 10         | 23         |
| 45           | 2                 | 0         | 3         | 2         | 4                 | 4          | 2          | 9          |
| 46           | 1                 | 0         | 0         | 1         | 5                 | 1          | 1          | 5          |
| 47           | 0                 | 0         | 0         | 0         | 1                 | 0          | 1          | 0          |
| 48           | 0                 | 0         | 0         | 0         | 1                 | 0          | 0          | 0          |
| 49           | 0                 | 0         | 0         | 0         | 0                 | 0          | 1          | 0          |
| 50           | 1                 | 0         | 0         | 0         | 0                 | 0          | 0          | 0          |
| 51           | 0                 | 0         | 0         | 0         | 0                 | 0          | 0          | 0          |
| 52           | 0                 | 0         | 0         | 0         | 0                 | 0          | 0          | 1          |
| <b>Total</b> | <b>149</b>        | <b>56</b> | <b>47</b> | <b>94</b> | <b>348</b>        | <b>238</b> | <b>202</b> | <b>547</b> |

**Table S5 Less common intrapartum interventions and adverse maternal outcomes by maternal age in low-risk nulliparous women aged 16 and over**

| Age (years)                                               | OU                       |                            |           | Non-OU                   |                            |            |
|-----------------------------------------------------------|--------------------------|----------------------------|-----------|--------------------------|----------------------------|------------|
|                                                           | Events/<br>Births<br>n/N | Weighted <sup>‡</sup><br>% | (95% CI)  | Events/<br>Births<br>n/N | Weighted <sup>‡</sup><br>% | (95% CI)   |
| <b>General anaesthesia</b>                                |                          |                            |           |                          |                            |            |
| 16-19                                                     | 17/1251                  | 1.4                        | (0.8-2.4) | 14/1562                  | 0.8                        | (0.4-1.5)  |
| 20-24                                                     | 47/2587                  | 1.8                        | (1.4-2.4) | 31/3698                  | 0.9                        | (0.6-1.4)  |
| 25-29                                                     | 58/2984                  | 1.9                        | (1.5-2.5) | 41/5349                  | 0.8                        | (0.5-1.3)  |
| 30-34                                                     | 44/2312                  | 1.8                        | (1.3-2.7) | 57/4900                  | 1.3                        | (0.9-1.9)  |
| 35-39                                                     | 20/949                   | 2.0                        | (1.2-3.5) | 16/2001                  | 0.9                        | (0.4-1.9)  |
| 40+                                                       | 5/143                    | 3.0                        | (1.2-7.6) | 2/195                    | 0.6                        | (0.1-2.5)  |
| Total                                                     | 191/10226                | 1.9                        | (1.5-2.3) | 161/17705                | 1.0                        | (0.8-1.2)  |
| <b>Maternal blood transfusion</b>                         |                          |                            |           |                          |                            |            |
| 16-19                                                     | 13/1260                  | 1.1                        | (0.7-1.9) | 10/1555                  | 0.6                        | (0.3-1.2)  |
| 20-24                                                     | 47/2606                  | 1.8                        | (1.4-2.5) | 29/3697                  | 0.8                        | (0.6-1.2)  |
| 25-29                                                     | 57/3024                  | 1.8                        | (1.2-2.6) | 54/5359                  | 1.0                        | (0.8-1.3)  |
| 30-34                                                     | 27/2335                  | 1.2                        | (0.8-1.8) | 64/4923                  | 1.7                        | (1.2-2.5)  |
| 35-39                                                     | 21/961                   | 2.3                        | (1.3-3.9) | 21/2002                  | 1.2                        | (0.7-2.1)  |
| 40+                                                       | 4/149                    | 2.8                        | (1.1-6.8) | 5/196                    | 1.6                        | (0.5-4.6)  |
| Total                                                     | 169/10335                | 1.6                        | (1.3-2.0) | 183/17732                | 1.1                        | (1.0-1.4)  |
| <b>3<sup>rd</sup>/4<sup>th</sup> degree perineal tear</b> |                          |                            |           |                          |                            |            |
| 16-19                                                     | 25/1259                  | 2.0                        | (1.2-3.2) | 30/1567                  | 1.9                        | (1.2-2.8)  |
| 20-24                                                     | 107/2609                 | 4.1                        | (3.3-5.3) | 118/3709                 | 3.2                        | (2.5-4.1)  |
| 25-29                                                     | 153/3030                 | 4.8                        | (3.9-5.8) | 274/5389                 | 5.4                        | (4.7-6.3)  |
| 30-34                                                     | 121/2343                 | 5.1                        | (4.3-6.1) | 267/4942                 | 5.8                        | (5.0-6.7)  |
| 35-39                                                     | 49/968                   | 5.0                        | (3.4-7.2) | 85/2007                  | 4.1                        | (3.2-5.2)  |
| 40+                                                       | 9/149                    | 5.3                        | (2.9-9.6) | 17/196                   | 11.1                       | (5.0-22.7) |
| Total                                                     | 464/10358                | 4.4                        | (3.8-5.1) | 791/17810                | 4.6                        | (4.1-5.2)  |
| <b>Maternal admission for higher level care</b>           |                          |                            |           |                          |                            |            |
| 16-19                                                     | 9/1266                   | 0.7                        | (0.3-1.6) | 5/1569                   | 0.3                        | (0.1-0.8)  |
| 20-24                                                     | 18/2620                  | 0.7                        | (0.4-1.2) | 22/3721                  | 0.8                        | (0.4-1.5)  |
| 25-29                                                     | 22/3043                  | 0.7                        | (0.4-1.3) | 24/5395                  | 0.7                        | (0.4-1.3)  |
| 30-34                                                     | 16/2351                  | 0.7                        | (0.4-1.3) | 31/4956                  | 1.3                        | (0.5-3.1)  |
| 35-39                                                     | 14/968                   | 1.9                        | (0.7-4.8) | 10/2021                  | 0.5                        | (0.2-1.1)  |
| 40+                                                       | 2/149                    | 1.5                        | (0.3-6.8) | 0/197                    | 0                          | -          |
| Total                                                     | 81/10397                 | 0.8                        | (0.5-1.4) | 92/17859                 | 0.8                        | (0.4-1.5)  |

<sup>‡</sup>Probability weights are incorporated to account for differences in the probability of a woman being selected for inclusion in the study arising from differences in each unit/trust's period of participation and the stratum-specific probabilities of selection of OUs.

**Table S6 Less common intrapartum interventions and adverse maternal outcomes by maternal age in low risk multiparous women aged 16 and over**

| Age (years)                                               | OU                     |                                     | Non-OU                 |                                     |
|-----------------------------------------------------------|------------------------|-------------------------------------|------------------------|-------------------------------------|
|                                                           | Events / Births<br>n/N | Weighted <sup>‡</sup><br>% (95% CI) | Events / Births<br>n/N | Weighted <sup>‡</sup><br>% (95% CI) |
| <b>General anaesthesia</b>                                |                        |                                     |                        |                                     |
| 16-19                                                     | 1/177                  | 0.7 (0.1-4.3)                       | 1/339                  | 0.5 (0.1-3.6)                       |
| 20-24                                                     | 15/1516                | 1.0 (0.6-1.7)                       | 15/3518                | 0.4 (0.2-0.8)                       |
| 25-29                                                     | 19/2528                | 0.8 (0.5-1.2)                       | 18/7072                | 0.3 (0.1-0.5)                       |
| 30-34                                                     | 21/2569                | 0.8 (0.5-1.3)                       | 17/8526                | 0.2 (0.1-0.4)                       |
| 35-39                                                     | 19/1584                | 1.1 (0.7-1.7)                       | 16/5790                | 0.3 (0.1-0.5)                       |
| 40+                                                       | 9/343                  | 2.6 (1.5-4.6)                       | 5/985                  | 0.5 (0.2-1.6)                       |
| Total                                                     | 84/8717                | 0.9 (0.7-1.2)                       | 72/26230               | 0.3 (0.2-0.4)                       |
| <b>Maternal blood transfusion</b>                         |                        |                                     |                        |                                     |
| 16-19                                                     | 3/179                  | 1.7 (0.4-6.4)                       | 1/339                  | 0.5 (0.1-3.6)                       |
| 20-24                                                     | 6/1519                 | 0.4 (0.2-0.9)                       | 15/3495                | 0.5 (0.2-0.9)                       |
| 25-29                                                     | 16/2544                | 0.6 (0.3-1.0)                       | 26/7024                | 0.4 (0.3-0.6)                       |
| 30-34                                                     | 23/2575                | 0.9 (0.5-1.6)                       | 35/8478                | 0.4 (0.3-0.5)                       |
| 35-39                                                     | 11/1593                | 0.6 (0.3-1.1)                       | 30/5759                | 0.6 (0.4-1.0)                       |
| 40+                                                       | 7/345                  | 2.2 (1.1-4.3)                       | 6/979                  | 0.8 (0.3-1.8)                       |
| Total                                                     | 66/8755                | 0.7 (0.6-1.0)                       | 113/26074              | 0.5 (0.4-0.6)                       |
| <b>3<sup>rd</sup>/4<sup>th</sup> degree perineal tear</b> |                        |                                     |                        |                                     |
| 16-19                                                     | 5/179                  | 2.7 (1.2-5.9)                       | 4/340                  | 0.9 (0.3-2.4)                       |
| 20-24                                                     | 15/1529                | 1.1 (0.6-1.8)                       | 29/3518                | 1.0 (0.7-1.4)                       |
| 25-29                                                     | 44/2550                | 1.8 (1.3-2.3)                       | 60/7075                | 1.0 (0.7-1.3)                       |
| 30-34                                                     | 42/2588                | 1.6 (1.1-2.3)                       | 123/8531               | 1.6 (1.3-2.1)                       |
| 35-39                                                     | 32/1600                | 2.0 (1.3-3.1)                       | 71/5792                | 1.3 (1.0-1.7)                       |
| 40+                                                       | 5/345                  | 1.4 (0.6-3.3)                       | 12/985                 | 1.2 (0.6-2.2)                       |
| Total                                                     | 143/8791               | 1.7 (1.3-2.1)                       | 299/26241              | 1.3 (1.1-1.5)                       |
| <b>Maternal admission for higher level care</b>           |                        |                                     |                        |                                     |
| 16-19                                                     | 1/179                  | 0.5 (0.1-3.6)                       | 1/340                  | 0.5 (0.1-3.6)                       |
| 20-24                                                     | 1/1530                 | 0.1 (0.0-0.5)                       | 8/3524                 | 0.2 (0.1-0.5)                       |
| 25-29                                                     | 9/2558                 | 0.3 (0.2-0.7)                       | 17/7095                | 0.3 (0.2-0.5)                       |
| 30-34                                                     | 13/2595                | 0.5 (0.2-1.1)                       | 22/8551                | 0.3 (0.2-0.5)                       |
| 35-39                                                     | 4/1603                 | 0.3 (0.1-0.7)                       | 16/5805                | 0.3 (0.2-0.5)                       |
| 40+                                                       | 4/348                  | 1.2 (0.5-3.1)                       | 7/987                  | 0.7 (0.3-1.6)                       |
| Total                                                     | 32/8813                | 0.4 (0.2-0.6)                       | 71/26302               | 0.3 (0.2-0.4)                       |

<sup>‡</sup>Probability weights are incorporated to account for differences in the probability of a woman being selected for inclusion in the study arising from differences in each unit/trust's period of participation and the stratum-specific probabilities of selection of OUs.

**Table S7-S5 Association between maternal age and intrapartum interventions and adverse maternal outcomes in low risk women aged between 16 and 40 years old (inclusive) additionally adjusted for complicating conditions**

|                                                       | Nulliparous women<br>Adjusted <sup>1</sup> |               | Multiparous women<br>Adjusted <sup>1</sup> |              |
|-------------------------------------------------------|--------------------------------------------|---------------|--------------------------------------------|--------------|
|                                                       | RR                                         | (95% CI)      | RR                                         | (95% CI)     |
| Maternal composite                                    | 1.12                                       | (1.09-1.15)   | 1.07                                       | (1.02-1.12)  |
| OU <sup>2</sup>                                       | 1.11                                       | (1.08-1.14)   |                                            |              |
| Non-OU <sup>2</sup>                                   | 1.21                                       | (1.18-1.24)   |                                            |              |
|                                                       | Wald test for interaction                  | $P^3 < 0.001$ | Wald test for interaction                  | $P^3 = 0.50$ |
| Augmentation                                          | 1.11                                       | (1.06-1.15)   | 0.98                                       | (0.90-1.07)  |
| OU <sup>2</sup>                                       | 1.10                                       | (1.05-1.15)   |                                            |              |
| Non-OU <sup>2</sup>                                   | 1.22                                       | (1.17-1.28)   |                                            |              |
|                                                       | Wald test for interaction                  | $P^3 < 0.001$ | Wald test for interaction                  | $P^3 = 0.33$ |
| Instrumental delivery                                 | 1.18                                       | (1.11-1.25)   | 1.14                                       | (1.04-1.25)  |
|                                                       | Wald test for interaction                  | $P^3 = 0.17$  | Wald test for interaction                  | $P^3 = 0.08$ |
| Intrapartum caesarean section                         | 1.25                                       | (1.20-1.30)   | 1.13                                       | (1.03-1.23)  |
|                                                       | Wald test for interaction                  | $P^3 = 0.12$  | Wald test for interaction                  | $P^3 = 0.40$ |
| General anaesthesia                                   | 1.04                                       | (0.91-1.19)   | 1.07                                       | (0.89-1.29)  |
|                                                       | Wald test for interaction                  | $P^3 = 0.71$  | Wald test for interaction                  | $P^3 = 0.17$ |
| Maternal blood transfusion                            | 1.13                                       | (0.95-1.33)   | 1.21                                       | (0.93-1.59)  |
|                                                       | Wald test for interaction                  | $P^3 = 0.38$  | Wald test for interaction                  | $P^3 = 0.50$ |
| 3 <sup>rd</sup> /4 <sup>th</sup> degree perineal tear | 1.12                                       | (1.02-1.23)   | 1.01                                       | (0.89-1.15)  |
|                                                       | Wald test for interaction                  | $P^3 = 0.41$  | Wald test for interaction                  | $P^3 = 0.30$ |
| Maternal admission for higher level care              | 1.45                                       | (1.07-1.96)   | 1.47                                       | (1.04-2.08)  |
|                                                       | Wald test for interaction                  | $P^3 = 0.43$  | Wald test for interaction                  | $P^3 = 0.16$ |
| Neonatal composite                                    | 1.04                                       | (0.94-1.16)   | 0.97                                       | (0.83-1.13)  |
|                                                       | Wald test for interaction                  | $P^3 = 0.78$  | Wald test for interaction                  | $P^3 = 0.66$ |

<sup>1</sup> Probability weights are incorporated to account for differences in the probability of a woman being selected for inclusion in the study arising from differences in each unit/trust's period of participation and the stratum specific probabilities of selection of OUs. Models were adjusted for ethnic group, understanding of English, marital/partner status, BMI in pregnancy, index of multiple deprivation score quintile, gestation at delivery, planned place of birth (OU/AMU/FMU/home), and complicating conditions identified at the start of care in labour.

<sup>2</sup> Results in these rows were weighted and adjusted as in footnote 1, with the exception of planned place of birth.

<sup>3</sup>  $P$  for interaction, results in these rows were weighted and adjusted as in footnote 1 except that planned place of birth was included as a binary variable (OU vs. non-OU).

**Table S5-S6** Less common intrapartum interventions and adverse maternal outcomes by maternal age in low risk nulliparous women aged 16 and over

| Age (years)                                               | Events / Births<br>n/N | OU                         |           | Events / Births<br>n/N | Non-OU                     |            |
|-----------------------------------------------------------|------------------------|----------------------------|-----------|------------------------|----------------------------|------------|
|                                                           |                        | Weighted <sup>1</sup><br>% | (95% CI)  |                        | Weighted <sup>1</sup><br>% | (95% CI)   |
| <b>General anaesthesia</b>                                |                        |                            |           |                        |                            |            |
| 16-19                                                     | 17/1251                | 1.4                        | (0.8-2.4) | 14/1562                | 0.8                        | (0.4-1.5)  |
| 20-24                                                     | 47/2587                | 1.8                        | (1.4-2.4) | 31/3698                | 0.9                        | (0.6-1.4)  |
| 25-29                                                     | 58/2984                | 1.9                        | (1.5-2.5) | 41/5349                | 0.8                        | (0.5-1.3)  |
| 30-34                                                     | 44/2312                | 1.8                        | (1.3-2.7) | 57/4900                | 1.3                        | (0.9-1.9)  |
| 35-39                                                     | 20/949                 | 2.0                        | (1.2-3.5) | 16/2001                | 0.9                        | (0.4-1.9)  |
| 40+                                                       | 5/143                  | 3.0                        | (1.2-7.6) | 2/195                  | 0.6                        | (0.1-2.5)  |
| Total                                                     | 191/10226              | 1.9                        | (1.5-2.3) | 161/17705              | 1.0                        | (0.8-1.2)  |
| <b>Maternal blood transfusion</b>                         |                        |                            |           |                        |                            |            |
| 16-19                                                     | 13/1260                | 1.1                        | (0.7-1.9) | 10/1555                | 0.6                        | (0.3-1.2)  |
| 20-24                                                     | 47/2606                | 1.8                        | (1.4-2.5) | 29/3697                | 0.8                        | (0.6-1.2)  |
| 25-29                                                     | 57/3024                | 1.8                        | (1.2-2.6) | 54/5359                | 1.0                        | (0.8-1.3)  |
| 30-34                                                     | 27/2335                | 1.2                        | (0.8-1.8) | 64/4923                | 1.7                        | (1.2-2.5)  |
| 35-39                                                     | 21/961                 | 2.3                        | (1.3-3.9) | 21/2002                | 1.2                        | (0.7-2.1)  |
| 40+                                                       | 4/149                  | 2.8                        | (1.1-6.8) | 5/196                  | 1.6                        | (0.5-4.6)  |
| Total                                                     | 169/10335              | 1.6                        | (1.3-2.0) | 183/17732              | 1.1                        | (1.0-1.4)  |
| <b>3<sup>rd</sup>/4<sup>th</sup> degree perineal tear</b> |                        |                            |           |                        |                            |            |
| 16-19                                                     | 25/1259                | 2.0                        | (1.2-3.2) | 30/1567                | 1.9                        | (1.2-2.8)  |
| 20-24                                                     | 107/2609               | 4.1                        | (3.3-5.3) | 118/3709               | 3.2                        | (2.5-4.1)  |
| 25-29                                                     | 153/3030               | 4.8                        | (3.9-5.8) | 274/5389               | 5.4                        | (4.7-6.3)  |
| 30-34                                                     | 121/2343               | 5.1                        | (4.3-6.1) | 267/4942               | 5.8                        | (5.0-6.7)  |
| 35-39                                                     | 49/968                 | 5.0                        | (3.4-7.2) | 85/2007                | 4.1                        | (3.2-5.2)  |
| 40+                                                       | 9/149                  | 5.3                        | (2.9-9.6) | 17/196                 | 11.1                       | (5.0-22.7) |
| Total                                                     | 464/10358              | 4.4                        | (3.8-5.1) | 791/17810              | 4.6                        | (4.1-5.2)  |
| <b>Maternal admission for higher level care</b>           |                        |                            |           |                        |                            |            |
| 16-19                                                     | 9/1266                 | 0.7                        | (0.3-1.6) | 5/1569                 | 0.3                        | (0.1-0.8)  |
| 20-24                                                     | 18/2620                | 0.7                        | (0.4-1.2) | 22/3721                | 0.8                        | (0.4-1.5)  |
| 25-29                                                     | 22/3043                | 0.7                        | (0.4-1.3) | 24/5395                | 0.7                        | (0.4-1.3)  |
| 30-34                                                     | 16/2351                | 0.7                        | (0.4-1.3) | 31/4956                | 1.3                        | (0.5-3.1)  |
| 35-39                                                     | 14/968                 | 1.9                        | (0.7-4.8) | 10/2021                | 0.5                        | (0.2-1.1)  |
| 40+                                                       | 2/149                  | 1.5                        | (0.3-6.8) | 0/197                  | 0                          | -          |
| Total                                                     | 81/10397               | 0.8                        | (0.5-1.4) | 92/17859               | 0.8                        | (0.4-1.5)  |

<sup>1</sup>Probability weights are incorporated to account for differences in the probability of a woman being selected for inclusion in the study arising from differences in each unit/trust's period of participation and the stratum specific probabilities of selection of OUs.

**Table S6-S7** Less common intrapartum interventions and adverse maternal outcomes by maternal age in low risk multiparous women aged 16 and over

| Age (years)                                               | Events / Births<br>n/N | OU                         |           | Events / Births<br>n/N | Non-OU                     |           |
|-----------------------------------------------------------|------------------------|----------------------------|-----------|------------------------|----------------------------|-----------|
|                                                           |                        | Weighted <sup>1</sup><br>% | (95% CI)  |                        | Weighted <sup>1</sup><br>% | (95% CI)  |
| <b>General anaesthesia</b>                                |                        |                            |           |                        |                            |           |
| 16-19                                                     | 1/177                  | 0.7                        | (0.1-4.3) | 1/339                  | 0.5                        | (0.1-3.6) |
| 20-24                                                     | 15/1516                | 1.0                        | (0.6-1.7) | 15/3518                | 0.4                        | (0.2-0.8) |
| 25-29                                                     | 19/2528                | 0.8                        | (0.5-1.2) | 18/7072                | 0.3                        | (0.1-0.5) |
| 30-34                                                     | 21/2569                | 0.8                        | (0.5-1.3) | 17/8526                | 0.2                        | (0.1-0.4) |
| 35-39                                                     | 19/1584                | 1.1                        | (0.7-1.7) | 16/5790                | 0.3                        | (0.1-0.5) |
| 40+                                                       | 9/343                  | 2.6                        | (1.5-4.6) | 5/985                  | 0.5                        | (0.2-1.6) |
| Total                                                     | 84/8717                | 0.9                        | (0.7-1.2) | 72/26230               | 0.3                        | (0.2-0.4) |
| <b>Maternal blood transfusion</b>                         |                        |                            |           |                        |                            |           |
| 16-19                                                     | 3/179                  | 1.7                        | (0.4-6.4) | 1/339                  | 0.5                        | (0.1-3.6) |
| 20-24                                                     | 6/1519                 | 0.4                        | (0.2-0.9) | 15/3495                | 0.5                        | (0.2-0.9) |
| 25-29                                                     | 16/2544                | 0.6                        | (0.3-1.0) | 26/7024                | 0.4                        | (0.3-0.6) |
| 30-34                                                     | 23/2575                | 0.9                        | (0.5-1.6) | 35/8478                | 0.4                        | (0.3-0.5) |
| 35-39                                                     | 11/1593                | 0.6                        | (0.3-1.1) | 30/5759                | 0.6                        | (0.4-1.0) |
| 40+                                                       | 7/345                  | 2.2                        | (1.1-4.3) | 6/979                  | 0.8                        | (0.3-1.8) |
| Total                                                     | 66/8755                | 0.7                        | (0.6-1.0) | 113/26074              | 0.5                        | (0.4-0.6) |
| <b>3<sup>rd</sup>/4<sup>th</sup> degree perineal tear</b> |                        |                            |           |                        |                            |           |
| 16-19                                                     | 5/179                  | 2.7                        | (1.2-5.9) | 4/340                  | 0.9                        | (0.3-2.4) |
| 20-24                                                     | 15/1529                | 1.1                        | (0.6-1.8) | 29/3518                | 1.0                        | (0.7-1.4) |
| 25-29                                                     | 44/2550                | 1.8                        | (1.3-2.3) | 60/7075                | 1.0                        | (0.7-1.3) |
| 30-34                                                     | 42/2588                | 1.6                        | (1.1-2.3) | 123/8531               | 1.6                        | (1.3-2.1) |
| 35-39                                                     | 32/1600                | 2.0                        | (1.3-3.1) | 71/5792                | 1.3                        | (1.0-1.7) |
| 40+                                                       | 5/345                  | 1.4                        | (0.6-3.3) | 12/985                 | 1.2                        | (0.6-2.2) |
| Total                                                     | 143/8791               | 1.7                        | (1.3-2.1) | 299/26241              | 1.3                        | (1.1-1.5) |
| <b>Maternal admission for higher level care</b>           |                        |                            |           |                        |                            |           |
| 16-19                                                     | 1/179                  | 0.5                        | (0.1-3.6) | 1/340                  | 0.5                        | (0.1-3.6) |
| 20-24                                                     | 1/1530                 | 0.1                        | (0.0-0.5) | 8/3524                 | 0.2                        | (0.1-0.5) |
| 25-29                                                     | 9/2558                 | 0.3                        | (0.2-0.7) | 17/7095                | 0.3                        | (0.2-0.5) |
| 30-34                                                     | 13/2595                | 0.5                        | (0.2-1.1) | 22/8551                | 0.3                        | (0.2-0.5) |
| 35-39                                                     | 4/1603                 | 0.3                        | (0.1-0.7) | 16/5805                | 0.3                        | (0.2-0.5) |
| 40+                                                       | 4/348                  | 1.2                        | (0.5-3.1) | 7/987                  | 0.7                        | (0.3-1.6) |
| Total                                                     | 32/8813                | 0.4                        | (0.2-0.6) | 71/26302               | 0.3                        | (0.2-0.4) |

<sup>1</sup> Probability weights are incorporated to account for differences in the probability of a woman being selected for inclusion in the study arising from differences in each unit/trust's period of participation and the stratum specific probabilities of selection of OUs.

**Table S8 Event rates in restricted sample of nulliparous women aged 16 and over without complicating conditions identified at the start of care in labour**

| Age (years)                          | OU                     |                                     |  | Non-OU                 |                                     |  |
|--------------------------------------|------------------------|-------------------------------------|--|------------------------|-------------------------------------|--|
|                                      | Events / Births<br>n/N | Weighted <sup>1</sup><br>% (95% CI) |  | Events / Births<br>n/N | Weighted <sup>1</sup><br>% (95% CI) |  |
| <b>Maternal composite</b>            |                        |                                     |  |                        |                                     |  |
| 16-19                                | 335/985                | 34.4 (30.9-38.1)                    |  | 221/1418               | 16.9 (14.6-19.4)                    |  |
| 20-24                                | 861/2039               | 42.3 (38.9-45.9)                    |  | 768/3382               | 22.7 (20.6-25.0)                    |  |
| 25-29                                | 1160/2302              | 50.1 (47.4-52.7)                    |  | 1453/4929              | 30.2 (27.5-33.0)                    |  |
| 30-34                                | 902/1680               | 54.5 (49.8-59.1)                    |  | 1524/4442              | 35.4 (33.2-37.6)                    |  |
| 35-39                                | 391/680                | 57.7 (53.4-62.0)                    |  | 685/1800               | 38.0 (34.3-41.9)                    |  |
| 40+                                  | 67/98                  | 66.1 (53.7-76.6)                    |  | 70/173                 | 42.4 (32.9-52.5)                    |  |
| Total                                | 3716/7784              | 48.1 (45.5-50.8)                    |  | 4721/16144             | 29.7 (27.8-31.6)                    |  |
| <b>Augmentation</b>                  |                        |                                     |  |                        |                                     |  |
| 16-19                                | 224/991                | 23.0 (19.9-26.4)                    |  | 119/1428               | 8.0 (6.5-9.9)                       |  |
| 20-24                                | 527/2044               | 25.8 (22.0-30.0)                    |  | 417/3406               | 12.0 (10.5-13.8)                    |  |
| 25-29                                | 701/2305               | 30.0 (27.5-32.6)                    |  | 777/4944               | 15.8 (14.1-17.7)                    |  |
| 30-34                                | 523/1678               | 31.4 (27.5-35.6)                    |  | 838/4462               | 18.8 (17.2-20.5)                    |  |
| 35-39                                | 239/676                | 34.8 (28.3-42.0)                    |  | 402/1817               | 21.1 (18.2-24.3)                    |  |
| 40+                                  | 41/99                  | 40.2 (27.9-53.9)                    |  | 37/173                 | 22.6 (14.3-33.8)                    |  |
| Total                                | 2255/7793              | 29.0 (26.2-32.0)                    |  | 2590/16230             | 15.7 (14.5-16.9)                    |  |
| <b>Instrumental delivery</b>         |                        |                                     |  |                        |                                     |  |
| 16-19                                | 139/1008               | 13.6 (10.8-16.9)                    |  | 92/1432                | 8.2 (6.4-10.5)                      |  |
| 20-24                                | 354/2073               | 17.0 (14.9-19.4)                    |  | 350/3418               | 10.0 (8.5-11.8)                     |  |
| 25-29                                | 512/2328               | 22.2 (19.9-24.6)                    |  | 672/4962               | 14.0 (12.2-16.0)                    |  |
| 30-34                                | 411/1700               | 25.3 (20.0-31.4)                    |  | 713/4487               | 16.8 (15.0-18.9)                    |  |
| 35-39                                | 191/686                | 28.9 (24.2-34.1)                    |  | 353/1819               | 19.3 (15.8-23.4)                    |  |
| 40+                                  | 26/99                  | 26.9 (17.8-38.5)                    |  | 31/174                 | 20.7 (12.8-31.6)                    |  |
| Total                                | 1633/7894              | 21.2 (18.7-23.9)                    |  | 2211/16292             | 14.0 (12.6-15.5)                    |  |
| <b>Intrapartum caesarean section</b> |                        |                                     |  |                        |                                     |  |
| 16-19                                | 65/1008                | 6.8 (4.9-9.4)                       |  | 45/1432                | 2.7 (2.0-3.7)                       |  |
| 20-24                                | 194/2073               | 9.4 (7.8-11.3)                      |  | 156/3418               | 4.6 (3.6-5.8)                       |  |
| 25-29                                | 308/2328               | 13.0 (11.2-15.1)                    |  | 343/4962               | 7.3 (6.3-8.5)                       |  |
| 30-34                                | 267/1700               | 15.8 (13.2-18.9)                    |  | 382/4487               | 8.3 (7.2-9.6)                       |  |
| 35-39                                | 125/686                | 18.3 (13.9-23.9)                    |  | 177/1819               | 10.1 (8.1-12.5)                     |  |
| 40+                                  | 27/99                  | 25.6 (16.1-38.2)                    |  | 18/174                 | 8.8 (4.8-15.4)                      |  |
| Total                                | 986/7894               | 12.6 (11.0-14.5)                    |  | 1121/16292             | 6.9 (6.2-7.6)                       |  |
| <b>Perinatal composite</b>           |                        |                                     |  |                        |                                     |  |
| 16-19                                | 26/1003                | 2.6 (1.8-3.8)                       |  | 23/1419                | 2.5 (1.6-4.0)                       |  |
| 20-24                                | 58/2064                | 2.9 (1.9-4.3)                       |  | 87/3402                | 2.4 (1.9-3.1)                       |  |
| 25-29                                | 57/2319                | 2.7 (2.0-3.5)                       |  | 104/4932               | 2.0 (1.5-2.6)                       |  |
| 30-34                                | 67/1694                | 3.7 (2.6-5.2)                       |  | 108/4459               | 2.9 (2.1-4.0)                       |  |
| 35-39                                | 14/682                 | 1.8 (1.0-3.4)                       |  | 56/1804                | 2.5 (1.8-3.4)                       |  |
| 40+                                  | 7/99                   | 7.8 (3.8-15.6)                      |  | 4/172                  | 2.1 (0.5-8.5)                       |  |
| Total                                | 229/7861               | 2.9 (2.3-3.7)                       |  | 382/16188              | 2.4 (2.0-2.9)                       |  |

<sup>1</sup> Probability weights are incorporated to account for differences in the probability of a woman being selected for inclusion in the study arising from differences in each unit/trust's period of participation and the stratum specific probabilities of selection of OUs.



**Table S9 Event rates in restricted sample of multiparous women aged 16 and over without complicating conditions identified at the start of care in labour**

| Age (years)                          | OU                     |                                     |  | Non-OU                 |                                     |  |
|--------------------------------------|------------------------|-------------------------------------|--|------------------------|-------------------------------------|--|
|                                      | Events / Births<br>n/N | Weighted <sup>1</sup><br>% (95% CI) |  | Events / Births<br>n/N | Weighted <sup>1</sup><br>% (95% CI) |  |
| <b>Maternal composite</b>            |                        |                                     |  |                        |                                     |  |
| 16-19                                | 23/149                 | 14.2 (8.7-22.1)                     |  | 18/323                 | 6.2 (3.8-10.0)                      |  |
| 20-24                                | 183/1311               | 14.1 (11.9-16.8)                    |  | 130/3320               | 4.3 (3.4-5.5)                       |  |
| 25-29                                | 334/2159               | 15.5 (13.8-17.3)                    |  | 272/6663               | 4.7 (3.9-5.6)                       |  |
| 30-34                                | 342/2155               | 15.7 (13.3-18.5)                    |  | 376/8033               | 5.1 (4.4-5.9)                       |  |
| 35-39                                | 232/1316               | 17.8 (15.4-20.3)                    |  | 242/5421               | 5.3 (4.5-6.2)                       |  |
| 40+                                  | 54/265                 | 20.3 (16.4-24.8)                    |  | 55/917                 | 6.8 (5.1-9.1)                       |  |
| Total                                | 1168/7355              | 15.9 (14.2-17.8)                    |  | 1093/24677             | 5.0 (4.5-5.6)                       |  |
| <b>Augmentation</b>                  |                        |                                     |  |                        |                                     |  |
| 16-19                                | 11/150                 | 6.8 (3.5-12.8)                      |  | 9/324                  | 3.2 (1.7-6.0)                       |  |
| 20-24                                | 101/1321               | 7.6 (6.0-9.6)                       |  | 53/3352                | 1.8 (1.3-2.5)                       |  |
| 25-29                                | 155/2179               | 7.2 (5.7-9.0)                       |  | 94/6743                | 1.6 (1.2-2.1)                       |  |
| 30-34                                | 165/2175               | 7.5 (5.9-9.6)                       |  | 112/8118               | 1.5 (1.2-1.9)                       |  |
| 35-39                                | 93/1331                | 6.9 (5.5-8.7)                       |  | 80/5476                | 1.7 (1.2-2.3)                       |  |
| 40+                                  | 22/268                 | 8.3 (5.0-13.3)                      |  | 12/927                 | 1.2 (0.6-2.3)                       |  |
| Total                                | 547/7424               | 7.3 (6.1-8.8)                       |  | 360/24940              | 1.6 (1.4-1.9)                       |  |
| <b>Instrumental delivery</b>         |                        |                                     |  |                        |                                     |  |
| 16-19                                | 7/151                  | 4.2 (1.9-9.1)                       |  | 7/324                  | 3.3 (1.4-7.4)                       |  |
| 20-24                                | 45/1334                | 3.4 (2.4-4.8)                       |  | 33/3352                | 1.3 (0.9-1.9)                       |  |
| 25-29                                | 111/2205               | 5.1 (4.3-6.0)                       |  | 95/6757                | 1.7 (1.3-2.3)                       |  |
| 30-34                                | 126/2194               | 5.8 (4.7-7.1)                       |  | 119/8126               | 1.6 (1.2-2.0)                       |  |
| 35-39                                | 80/1338                | 6.1 (4.7-8.0)                       |  | 73/5482                | 1.7 (1.3-2.3)                       |  |
| 40+                                  | 20/269                 | 7.2 (4.5-11.3)                      |  | 15/929                 | 2.3 (1.1-4.9)                       |  |
| Total                                | 389/7491               | 5.3 (4.5-6.2)                       |  | 342/24970              | 1.7 (1.4-2.0)                       |  |
| <b>Intrapartum caesarean section</b> |                        |                                     |  |                        |                                     |  |
| 16-19                                | 4/151                  | 2.5 (0.9-7.2)                       |  | 4/324                  | 1.0 (0.3-2.7)                       |  |
| 20-24                                | 48/1334                | 3.6 (2.2-6.1)                       |  | 17/3352                | 0.5 (0.2-1.0)                       |  |
| 25-29                                | 79/2205                | 3.6 (2.7-4.7)                       |  | 42/6757                | 0.6 (0.4-0.9)                       |  |
| 30-34                                | 80/2194                | 3.6 (2.6-4.9)                       |  | 54/8126                | 0.7 (0.5-1.1)                       |  |
| 35-39                                | 64/1338                | 4.8 (3.4-6.7)                       |  | 41/5482                | 0.9 (0.6-1.4)                       |  |
| 40+                                  | 11/269                 | 4.0 (2.2-7.4)                       |  | 14/929                 | 1.4 (0.7-2.6)                       |  |
| Total                                | 286/7491               | 3.8 (2.9-5.0)                       |  | 172/24970              | 0.7 (0.6-0.9)                       |  |
| <b>Perinatal composite</b>           |                        |                                     |  |                        |                                     |  |
| 16-19                                | 4/151                  | 2.2 (0.8-5.7)                       |  | 4/322                  | 1.5 (0.5-4.5)                       |  |
| 20-24                                | 19/1325                | 1.5 (0.9-2.5)                       |  | 39/3323                | 1.2 (0.8-1.7)                       |  |
| 25-29                                | 34/2199                | 1.6 (1.1-2.2)                       |  | 61/6701                | 1.0 (0.7-1.6)                       |  |
| 30-34                                | 30/2182                | 1.4 (0.9-2.0)                       |  | 97/8058                | 1.1 (0.9-1.4)                       |  |
| 35-39                                | 26/1334                | 2.0 (1.2-3.4)                       |  | 82/5445                | 1.6 (1.2-2.1)                       |  |
| 40+                                  | 6/268                  | 2.2 (0.9-5.1)                       |  | 17/920                 | 2.1 (1.1-4.0)                       |  |
| Total                                | 119/7459               | 1.6 (1.2-2.1)                       |  | 300/24769              | 1.2 (1.0-1.5)                       |  |

<sup>1</sup> Probability weights are incorporated to account for differences in the probability of a woman being selected for inclusion in the study arising from differences in each unit/trust's period of participation and the stratum specific probabilities of selection of OUs.

**Table S10 Relative risk for non-OU compared to OU by age groups in nulliparous women without complicating conditions**

| <b>Age (years)</b>        | <b>Unadjusted RR<sup>1</sup> (95% CI)</b> | <b>Adjusted RR<sup>1,2</sup> (95% CI)</b> |
|---------------------------|-------------------------------------------|-------------------------------------------|
| <b>Maternal composite</b> |                                           |                                           |
| <u>16-19</u>              | <u>0.49 (0.41-0.59)</u>                   | <u>0.52 (0.43-0.62)</u>                   |
| <u>20-24</u>              | <u>0.54 (0.47-0.61)</u>                   | <u>0.54 (0.48-0.61)</u>                   |
| <u>25-29</u>              | <u>0.60 (0.54-0.67)</u>                   | <u>0.61 (0.55-0.68)</u>                   |
| <u>30-34</u>              | <u>0.65 (0.58-0.72)</u>                   | <u>0.67 (0.61-0.74)</u>                   |
| <u>35-39</u>              | <u>0.66 (0.58-0.75)</u>                   | <u>0.67 (0.60-0.76)</u>                   |
| <u>40+</u>                | <u>0.64 (0.48-0.86)</u>                   | <u>0.67 (0.48-0.92)</u>                   |
| <b>Augmentation</b>       |                                           |                                           |
| <u>16-19</u>              | <u>0.35 (0.27-0.45)</u>                   | <u>0.37 (0.29-0.47)</u>                   |
| <u>20-24</u>              | <u>0.47 (0.38-0.57)</u>                   | <u>0.47 (0.39-0.57)</u>                   |
| <u>25-29</u>              | <u>0.53 (0.46-0.61)</u>                   | <u>0.54 (0.47-0.61)</u>                   |
| <u>30-34</u>              | <u>0.60 (0.52-0.70)</u>                   | <u>0.63 (0.53-0.74)</u>                   |
| <u>35-39</u>              | <u>0.61 (0.48-0.77)</u>                   | <u>0.61 (0.49-0.75)</u>                   |
| <u>40+</u>                | <u>0.56 (0.33-0.97)</u>                   | <u>0.56 (0.33-0.95)</u>                   |

<sup>1</sup> Probability weights are incorporated to account for differences in the probability of a woman being selected for inclusion in the study arising from differences in each unit/trust's period of participation and the stratum specific probabilities of selection of OUs.

<sup>2</sup> Adjusted for ethnic group, understanding of English, marital/partner status, BMI in pregnancy, index of multiple deprivation score quintile, and gestation at delivery.



61x90mm (300 x 300 DPI)

1  
2  
3  
4  
5  
6  
7  
8  
9  
10  
11  
12  
13  
14  
15  
16  
17  
18  
19  
20  
21  
22  
23  
24  
25  
26  
27  
28  
29  
30  
31  
32  
33  
34  
35  
36  
37  
38  
39  
40  
41  
42  
43  
44  
45  
46  
47  
48  
49  
50  
51  
52  
53  
54  
55  
56  
57  
58  
59  
60

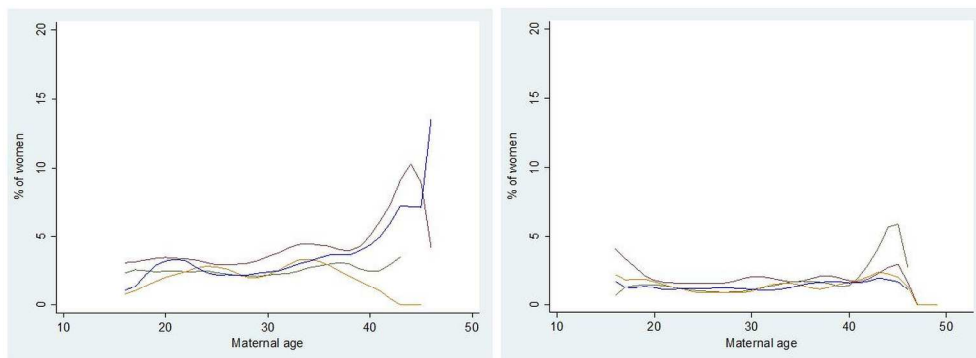

(a) Perinatal composite, nulliparous women (b) Perinatal composite, multiparous women

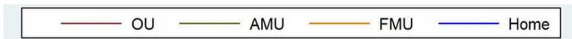

Figure 2 Association between maternal age and perinatal composite outcome in low risk women aged 16 and over

323x188mm (300 x 300 DPI)

review only

Please NOTE that the pages have been updated to be related to **the revised version with “track changes”**.

STROBE Statement—Checklist of items that should be included in reports of *cohort studies*

|                          | Item No | Recommendation                                                                                                                                                                       |                                                                                            |
|--------------------------|---------|--------------------------------------------------------------------------------------------------------------------------------------------------------------------------------------|--------------------------------------------------------------------------------------------|
| Title and abstract       | 1       | (a) Indicate the study’s design with a commonly used term in the title or the abstract                                                                                               | Yes – title and abstract                                                                   |
|                          |         | (b) Provide in the abstract an informative and balanced summary of what was done and what was found                                                                                  | Yes, p2-3                                                                                  |
| <b>Introduction</b>      |         |                                                                                                                                                                                      |                                                                                            |
| Background/rationale     | 2       | Explain the scientific background and rationale for the investigation being reported                                                                                                 | Yes, p5                                                                                    |
| Objectives               | 3       | State specific objectives, including any prespecified hypotheses                                                                                                                     | Yes, p5                                                                                    |
| <b>Methods</b>           |         |                                                                                                                                                                                      |                                                                                            |
| Study design             | 4       | Present key elements of study design early in the paper                                                                                                                              | Yes, p6                                                                                    |
| Setting                  | 5       | Describe the setting, locations, and relevant dates, including periods of recruitment, exposure, follow-up, and data collection                                                      | Yes, p6-7. References also given to other publications providing more details              |
| Participants             | 6       | (a) Give the eligibility criteria, and the sources and methods of selection of participants. Describe methods of follow-up                                                           | more details                                                                               |
|                          |         | (b) For matched studies, give matching criteria and number of exposed and unexposed                                                                                                  | N/A                                                                                        |
| Variables                | 7       | Clearly define all outcomes, exposures, predictors, potential confounders, and effect modifiers. Give diagnostic criteria, if applicable                                             | Yes, p7-8 and Table S1                                                                     |
| Data sources/measurement | 8*      | For each variable of interest, give sources of data and details of methods of assessment (measurement). Describe comparability of assessment methods if there is more than one group | Yes, p8, more details in cited reports.                                                    |
| Bias                     | 9       | Describe any efforts to address potential sources of bias                                                                                                                            | Cohort study methods to minimise bias addressed elsewhere – ref 26.                        |
| Study size               | 10      | Explain how the study size was arrived at                                                                                                                                            | N/A. Secondary analysis of existing data. Original power calculations described in ref 26. |
| Quantitative variables   | 11      | Explain how quantitative variables were handled in the analyses. If applicable, describe which groupings were chosen and why                                                         | Yes, p7-9.                                                                                 |
| Statistical methods      | 12      | (a) Describe all statistical methods, including those used to control for confounding                                                                                                | Yes, p7-9                                                                                  |
|                          |         | (b) Describe any methods used to examine subgroups and interactions                                                                                                                  | Yes, interactions p8                                                                       |
|                          |         | (c) Explain how missing data were addressed                                                                                                                                          | N/A. Low level of missing data                                                             |
|                          |         | (d) If applicable, explain how loss to follow-up was addressed                                                                                                                       | N/A                                                                                        |
|                          |         | (e) Describe any sensitivity analyses                                                                                                                                                | Yes, p8                                                                                    |

| <b>Results</b>           |     |                                                                                                                                                                                                              |                                                                                                                |
|--------------------------|-----|--------------------------------------------------------------------------------------------------------------------------------------------------------------------------------------------------------------|----------------------------------------------------------------------------------------------------------------|
| Participants             | 13* | (a) Report numbers of individuals at each stage of study—eg numbers potentially eligible, examined for eligibility, confirmed eligible, included in the study, completing follow-up, and analysed            | P10 for current study; refs given for 'recruitment' into main study                                            |
|                          |     | (b) Give reasons for non-participation at each stage                                                                                                                                                         | Ditto                                                                                                          |
|                          |     | (c) Consider use of a flow diagram                                                                                                                                                                           | N/A                                                                                                            |
| Descriptive data         | 14* | (a) Give characteristics of study participants (eg demographic, clinical, social) and information on exposures and potential confounders                                                                     | Yes, Tables 1, S2 and S3                                                                                       |
|                          |     | (b) Indicate number of participants with missing data for each variable of interest                                                                                                                          | Yes, Tables 1, S2 and S3                                                                                       |
|                          |     | (c) Summarise follow-up time (eg, average and total amount)                                                                                                                                                  | N/A                                                                                                            |
| Outcome data             | 15* | Report numbers of outcome events or summary measures over time                                                                                                                                               | Yes, fully reported in tables                                                                                  |
| Main results             | 16  | (a) Give unadjusted estimates and, if applicable, confounder-adjusted estimates and their precision (eg, 95% confidence interval). Make clear which confounders were adjusted for and why they were included | Yes, unadjusted & adjusted estimates and 95% CIs reported in tables; adjustment variables described (Table S1) |
|                          |     | (b) Report category boundaries when continuous variables were categorized                                                                                                                                    | Yes. Maternal age – Table 1; confounders Table S1                                                              |
|                          |     | (c) If relevant, consider translating estimates of relative risk into absolute risk for a meaningful time period                                                                                             | Absolute event rates reported in tables                                                                        |
| Other analyses           | 17  | Report other analyses done—eg analyses of subgroups and interactions, and sensitivity analyses                                                                                                               | All analyses reported in manuscript or supplementary tables                                                    |
| <b>Discussion</b>        |     |                                                                                                                                                                                                              |                                                                                                                |
| Key results              | 18  | Summarise key results with reference to study objectives                                                                                                                                                     | Yes, p14                                                                                                       |
| Limitations              | 19  | Discuss limitations of the study, taking into account sources of potential bias or imprecision. Discuss both direction and magnitude of any potential bias                                                   | Yes, p14-15                                                                                                    |
| Interpretation           | 20  | Give a cautious overall interpretation of results considering objectives, limitations, multiplicity of analyses, results from similar studies, and other relevant evidence                                   | Other evidence comprehensively summarised p15-17; cautious interpretation p17                                  |
| Generalisability         | 21  | Discuss the generalisability (external validity) of the study results                                                                                                                                        | Yes, p14                                                                                                       |
| <b>Other information</b> |     |                                                                                                                                                                                                              |                                                                                                                |
| Funding                  | 22  | Give the source of funding and the role of the funders for the present study and, if applicable, for the original study on which the present article is based                                                | Yes, p18                                                                                                       |

\*Give information separately for exposed and unexposed groups.
